# Supplementary material for: Single-cell RNA Sequencing Reveals Heterogeneity of Cultured Bovine Satellite Cells
Source: Front Genet. 2021 Oct 28;12:742077. doi: 10.3389/fgene.2021.742077 (PMC8580861; doi:10.3389/fgene.2021.742077)
Supplement: Supplementary file 3 [file DataSheet2.csv]

FeatureID	FeatureName	Cluster 1 Average	Cluster 1 Log2 Fold Change	Cluster 1 P-Value	Cluster 2 Average	Cluster 2 Log2 Fold Change	Cluster 2 P-Value	Cluster 3 Average	Cluster 3 Log2 Fold Change	Cluster 3 P-Value	Cluster 4 Average	Cluster 4 Log2 Fold Change	Cluster 4 P-Value	Cluster 5 Average	Cluster 5 Log2 Fold Change	Cluster 5 P-Value	Cluster 6 Average	Cluster 6 Log2 Fold Change	Cluster 6 P-Value	Cluster 7 Average	Cluster 7 Log2 Fold Change	Cluster 7 P-Value	Cluster 8 Average	Cluster 8 Log2 Fold Change	Cluster 8 P-Value	Cluster 9 Average	Cluster 9 Log2 Fold Change	Cluster 9 P-Value	Cluster 10 Average	Cluster 10 Log2 Fold Change	Cluster 10 P-Value	Cluster 11 Average	Cluster 11 Log2 Fold Change	Cluster 11 P-Value	Cluster 12 Average	Cluster 12 Log2 Fold Change	Cluster 12 P-Value	Cluster 13 Average	Cluster 13 Log2 Fold Change	Cluster 13 P-Value	Cluster 14 Average	Cluster 14 Log2 Fold Change	Cluster 14 P-Value	Cluster 15 Average	Cluster 15 Log2 Fold Change	Cluster 15 P-Value
ENSBTAG00000019262	TOP2A	0.268749876	-3.970481983	3.58E-26	8.535896504	1.52222228	1.39E-11	0.343209801	-3.623084791	1.93E-24	11.16190218	2.04009343	4.38E-20	0.822604738	-2.291987232	1.97E-08	2.773936902	-0.48006379	0.894800043	7.677988982	1.037569592	0.472742407	0.236756921	-4.063884772	3.77E-13	4.017717907	0.110706687	0.941581818	3.684025133	-0.027199111	1	2.674436309	-0.511225287	1	0.379169715	-3.360217253	1.27E-07	3.741443606	-0.017873205	1	2.098058229	-0.847930502	1	4.004627118	0.025460705	0.724684135
ENSBTAG00000017446	E2F8	0.017622943	-4.169170059	3.68E-24	0.446919375	0.768511925	0.012549853	0.015581304	-4.353775994	8.86E-27	0.535095034	1.076816816	0.000110647	0.200125336	-0.564642328	0.886466875	0.539469121	1.070248988	0.000617068	0.274465234	-0.044580373	0.974861623	0.02104506	-3.800702253	1.56E-10	0.41029371	0.574851452	0.108953728	0.29823971	0.057260098	1	0.488608135	0.822545413	0.228442456	0.013198946	-4.386481521	1.53E-09	0.179589293	-0.590261276	1	0.216294663	-0.360982027	1	0.407250215	0.626931568	0.724684135
ENSBTAG00000048508	INHBA	0.034805312	-4.273959375	3.75E-24	0.030497447	-4.49829332	3.81E-30	0.042532748	-3.994869448	2.48E-23	0.049776282	-3.764105565	6.07E-21	0.059141517	-3.460071407	8.78E-13	0.048047955	-3.795639745	1.73E-18	3.40618393	2.538483284	0.021605736	0.098210278	-2.685141679	4.65E-06	5.375581271	5.547988541	5.01E-159	1.173840909	0.996026264	0.951640972	0.065976441	-3.249074117	1.19E-06	0.051595879	-3.578054406	6.37E-07	0.658494075	0.134972458	1	0.34607146	-0.778703923	1	0.475125251	-0.249671622	0.724684135
ENSBTAG00000010774	NUSAP1	0.129969202	-3.757674	3.75E-24	4.008343442	1.772527753	5.00E-16	0.18655453	-3.239658673	8.46E-21	4.219827234	1.815313779	2.29E-15	0.335135264	-2.330229596	3.46E-08	1.398147926	-0.185330819	1	1.090823366	-0.528061996	1	0.087687748	-4.232004635	1.04E-13	1.410349354	-0.168371016	0.899656257	1.661348127	0.084334166	1	1.069009579	-0.579612524	1	0.182385433	-3.153761872	6.94E-07	1.661200961	0.07469513	1	1.178805912	-0.416105108	1	1.968376041	0.282117579	0.724684135
ENSBTAG00000014326	CDCA8	0.033483591	-3.887265474	1.31E-23	1.105438319	1.705129837	2.65E-14	0.042111632	-3.565906605	2.86E-22	1.071477385	1.578758249	5.71E-11	0.123062147	-1.948667753	9.82E-06	0.439567432	-0.022438795	1	0.450404487	0.026738132	0.922769932	0.030690712	-3.904744773	2.12E-11	0.459957873	0.050276977	1	0.598391213	0.440094639	0.969251526	0.386296843	-0.216116208	1	0.07199425	-2.663116868	3.86E-05	0.463939007	0.081670849	1	0.237924129	-0.861009387	1	0.407250215	-0.003373918	0.724684135
ENSBTAG00000008180	SPDL1	0.056393417	-3.756645518	1.70E-23	1.602057237	1.584693771	1.86E-12	0.088013311	-3.118710002	3.97E-19	1.432784537	1.308341517	2.00E-07	0.268227689	-1.428236089	0.002271413	0.779708898	0.216736747	1	0.879696263	0.369549485	0.707281597	0.051735772	-3.782297484	2.24E-11	0.892261836	0.431682582	0.319396346	0.594567626	-0.203513437	1	0.703748703	0.04622454	1	0.085193196	-3.041381636	2.25E-06	0.538767879	-0.325272754	1	0.58399559	-0.216070553	1	0.746625395	0.159315608	0.724684135
ENSBTAG00000002613	MIS18BP1	0.143186409	-3.646665989	2.35E-23	3.478968007	1.423922586	5.38E-10	0.144864014	-3.638219255	2.27E-24	3.909154576	1.611627619	8.56E-12	0.556766606	-1.610887149	0.000151733	1.802511906	0.193699329	1	3.497672341	1.133339812	0.312214949	0.142054152	-3.568049192	7.53E-11	1.785088038	0.17403639	0.824974265	1.586788199	-0.014015359	1	1.682877334	0.075928194	1	0.152387829	-3.44189865	8.13E-08	1.55644054	-0.04826652	1	0.800290252	-0.999825713	1	1.221750646	-0.406806012	0.724684135
ENSBTAG00000002826	CLSPN	0.041413915	-3.749121256	1.24E-22	0.660024991	0.476305389	0.307691955	0.052218424	-3.422784111	4.28E-21	0.759517409	0.710328557	0.043864452	0.511365037	0.035125852	1	1.014240006	1.215900529	2.57E-05	1.133048787	1.1916352	0.298150973	0.063135179	-3.046117919	3.33E-08	0.63660427	0.388630588	0.408670231	0.487507218	-0.035835035	1	1.049885973	1.164146086	0.014212516	0.033597317	-3.908116222	1.02E-08	0.404075909	-0.278414621	1	0.216294663	-1.159222811	1	0.543000287	0.19313076	0.724684135
ENSBTAG00000002756	CDCA2	0.074897507	-3.533279088	8.69E-22	1.89234775	1.666539143	6.18E-14	0.089697776	-3.279602224	9.02E-21	1.834856747	1.543622619	1.11E-10	0.249111239	-1.729757339	8.64E-05	0.737845333	-0.08302698	1	0.760057571	-0.028574042	0.948537863	0.067519566	-3.58848234	1.10E-10	0.923866303	0.278418038	0.621336433	0.753246446	-0.044841728	1	0.717135228	-0.121270035	1	0.091192716	-3.130652625	1.07E-06	0.553733654	-0.472850965	1	0.529921924	-0.540456376	1	0.543000287	-0.441828791	0.724684135
ENSBTAG00000007799	MTFR2	0.018944663	-3.781134833	2.43E-21	0.422069604	1.029526788	0.000109959	0.025688096	-3.354732066	2.36E-19	0.551830163	1.516423456	8.96E-10	0.140983819	-0.798670816	0.37256184	0.288763454	0.327126477	1	0.274465234	0.240548784	0.798506689	0.027183202	-3.158041686	3.33E-08	0.345956044	0.617749299	0.076694196	0.252356677	0.102056012	1	0.280160829	0.260987221	1	0.021598275	-3.437751989	6.17E-07	0.194555067	-0.199449991	1	0.162220997	-0.47087119	1	0.067875036	-0.898791729	0.902260231
ENSBTAG00000000752	SGO1	0.028637282	-3.659327945	3.62E-21	0.596394516	1.074982743	3.45E-05	0.025266979	-3.848342731	1.15E-23	0.719181457	1.402230831	2.42E-08	0.210878339	-0.67758211	0.610572506	0.460974937	0.572207163	0.391001555	0.323728225	0.006900756	0.941040395	0.057873914	-2.551003398	3.77E-06	0.393362745	0.298866049	0.538253495	0.378535016	0.22270891	1	0.391077744	0.277480926	1	0.055195591	-2.590639054	7.75E-05	0.374144361	0.230794934	1	0.227109396	-0.475851981	1	0.475125251	0.638029277	0.724684135
ENSBTAG00000021193	FBXO5	0.033043018	-3.611330939	6.46E-21	0.425081697	0.263340454	0.864378214	0.030741491	-3.724412778	7.34E-23	0.648808092	0.999850021	0.000515402	0.274798968	-0.437861582	1	0.782087509	1.324386572	2.69E-06	0.591155889	0.712505183	0.52218981	0.035951977	-3.387679612	3.18E-09	0.493819802	0.493725739	0.197754794	0.238974126	-0.613117479	1	0.797454373	1.234355043	0.004691077	0.037197029	-3.305545059	8.99E-07	0.299315488	-0.23504521	1	0.259553595	-0.447379595	1	0.407250215	0.288931773	0.724684135
ENSBTAG00000053398	KNL1	0.105297083	-3.408717631	6.46E-21	2.242880132	1.487206515	6.44E-11	0.112438058	-3.321558336	3.39E-21	2.30129484	1.488679023	6.79E-10	0.455210465	-1.209980816	0.017234256	0.967619218	-0.055156857	1	2.427961685	1.287646234	0.258879536	0.085057116	-3.625346568	6.53E-11	1.277159099	0.39245906	0.389356588	0.7933941	-0.343309018	1	1.084308464	0.121946305	1	0.080393579	-3.678330587	1.82E-08	0.957809563	-0.063173918	1	0.508292458	-0.966577734	1	0.407250215	-1.170727	0.770865251
ENSBTAG00000018571	IL1RL1	0.010133192	-4.446019373	9.44E-21	0.016566514	-3.791474959	8.36E-20	0.005053396	-5.408831513	2.79E-26	0.04162327	-2.431628434	2.54E-09	0.030466842	-2.830614017	6.31E-08	0.015223115	-3.858180026	2.18E-15	0.893771403	2.16886932	0.083961991	0.02455257	-3.084737168	3.07E-06	1.783394941	5.406142252	3.40E-129	0.225591575	0.158064329	1	0.153945029	-0.419858525	1	0.009599233	-4.303709377	3.38E-07	0.089794647	-0.98654376	1	0.162220997	-0.255256381	1	0.203625108	0.316844074	0.724684135
ENSBTAG00000005129	CEP55	0.082827831	-3.400780265	9.44E-21	1.969532646	1.733989036	3.41E-15	0.144442898	-2.595694917	9.50E-15	1.677803995	1.346879286	6.00E-08	0.302876254	-1.453341812	0.00168317	0.638895088	-0.327949005	1	0.964147104	0.300997467	0.746753107	0.075411464	-3.443632331	4.22E-10	1.040689959	0.457581467	0.277099463	0.892807336	0.193215074	1	0.653071147	-0.277100577	1	0.073194154	-3.458263952	1.04E-07	0.77822027	-0.004933301	1	0.72458712	-0.108643602	1	0.610875323	-0.303231755	0.724684135
ENSBTAG00000007860	ASPM	0.18151631	-3.363357461	9.68E-21	4.857377301	2.07367491	2.25E-22	0.317100589	-2.553362061	1.76E-14	4.093670105	1.619086756	8.00E-12	0.343498711	-2.386485618	1.93E-08	0.809679405	-1.133902639	0.005318952	4.954449352	1.58208697	0.171903228	0.091195258	-4.266802865	9.43E-14	1.775493825	0.097165555	0.966063146	1.477815998	-0.182170518	1	0.890203862	-0.946322063	0.394713866	0.125989937	-3.776538964	7.20E-09	1.182296179	-0.5032348	1	0.616439789	-1.432890206	1	1.086000574	-0.62870478	0.724684135
ENSBTAG00000015875	FOXM1	0.016301222	-3.793102838	9.81E-21	0.365216338	1.017722706	0.000177043	0.018108002	-3.65355886	8.46E-21	0.481027693	1.518820813	1.37E-09	0.080647523	-1.42732328	0.004429854	0.313501015	0.701696657	0.109573264	0.330765795	0.708124083	0.547226756	0.02455257	-3.099988179	1.10E-07	0.229696754	0.174868298	0.787978641	0.401476532	1.004006031	0.951640972	0.202710224	-0.021120693	1	0.032397412	-2.674440777	8.49E-05	0.329247037	0.720397379	1	0.064888399	-1.466416794	1	0.135750072	-0.113714372	0.728709933
ENSBTAG00000054548	ENSBTAG00000054548	0.087233566	-3.341101192	2.71E-20	0.838491532	0.094907729	1	0.119597035	-2.888739197	2.95E-17	1.33451929	0.896085538	0.00248946	0.393679392	-1.076604313	0.051546518	1.879103201	1.51410723	7.16E-09	0.358916075	-1.130978782	1	0.061381424	-3.753930808	2.24E-11	1.281109657	0.786806019	0.014547128	0.483683632	-0.72539729	0.994129097	1.79761897	1.29125747	0.002713514	0.101991854	-2.999428234	2.65E-06	0.314281263	-1.291922186	1	0.291997795	-1.408132377	1	0.271500144	-1.31919455	0.808142576
ENSBTAG00000000660	FAM83D	0.045819651	-3.454986617	3.56E-20	1.173963447	1.808853962	4.53E-16	0.065694146	-2.939948593	6.43E-17	0.996812962	1.406190034	1.98E-08	0.091997916	-2.395166202	4.48E-08	0.43909171	-0.046326051	1	1.020447665	1.188044108	0.301642505	0.036828854	-3.667053511	2.02E-10	0.542355234	0.293206269	0.604404078	0.409123704	-0.1439482	1	0.31649568	-0.536362316	1	0.081593483	-2.503864244	0.000113907	0.448973233	0.015881161	1	0.324441994	-0.448826884	1	0.475125251	0.169679121	0.724684135
ENSBTAG00000010048	SPC25	0.040532768	-3.418470985	4.38E-20	0.815147807	1.34154403	1.65E-08	0.049691726	-3.131881773	1.17E-18	0.920432115	1.5396455	2.03E-10	0.206696615	-0.978617435	0.114240751	0.505692836	0.427318595	0.894719094	0.274465234	-0.485598895	1	0.042966997	-3.235802092	6.58E-09	0.436818888	0.180332104	0.765508584	0.219856196	-0.836817122	0.971074806	0.418806973	0.108872536	1	0.052795783	-2.912238052	7.46E-06	0.179589293	-1.02940468	1	0.324441994	-0.236853499	1	0.271500144	-0.297612494	0.724684135
ENSBTAG00000010109	CDK1	0.048022519	-3.40323026	4.85E-20	1.04105482	1.522137812	3.31E-11	0.051797307	-3.302228615	3.74E-20	1.104947644	1.590979443	3.82E-11	0.155918545	-1.635988985	0.000315517	0.485712498	0.099479943	1	0.534855328	0.23714582	0.790391315	0.056120159	-3.083361531	2.36E-08	0.585811376	0.400712532	0.384267562	0.233238747	-0.981585748	0.954409037	0.40828899	-0.169934761	1	0.062395016	-2.903268029	8.02E-06	0.209520842	-1.050141583	1	0.540736657	0.256674865	1	0.33937518	-0.261705427	0.724684135
ENSBTAG00000020100	ENSBTAG00000020100	0.100450773	-3.301930797	6.84E-20	2.289567582	1.792564445	3.96E-16	0.183606716	-2.425726458	3.19E-13	1.858886676	1.30425762	2.26E-07	0.231189567	-2.037968764	2.32E-06	0.717389273	-0.341511554	1	1.970519629	1.158275344	0.306247387	0.069273321	-3.745643008	2.70E-11	1.02940265	0.236943284	0.708286245	1.372667382	0.650040642	0.951640972	0.607174493	-0.573816162	1	0.291576711	-1.646160498	0.012405155	1.406782796	0.660594123	1	0.465033525	-0.918907771	1	1.15387561	0.365928779	0.724684135
ENSBTAG00000005708	KIF20B	0.215881048	-3.218411084	1.11E-19	4.180785796	1.565508404	2.65E-12	0.197924671	-3.353448857	7.24E-22	4.314230527	1.575123344	3.04E-11	0.797514398	-1.24827009	0.007289546	1.773017121	-0.023288989	1	4.616645987	1.369351547	0.229886049	0.242018186	-2.966972369	2.40E-08	1.789602962	-0.008115587	1	1.477815998	-0.291345822	1	1.695307678	-0.090491112	1	0.211183133	-3.140807267	7.35E-07	1.661200961	-0.123328799	1	0.973325983	-0.888484613	1	2.104126113	0.177796103	0.724684135
ENSBTAG00000037811	CCL2	0.06917005	-3.637747043	1.87E-19	0.058359312	-3.916534576	1.28E-24	0.055587354	-3.962913768	7.34E-23	0.0583584	-3.888841255	1.39E-21	0.081244912	-3.356147274	4.87E-12	0.059465291	-3.842380585	1.73E-18	1.907181498	1.317782767	0.276327046	0.130654745	-2.627108414	9.95E-06	7.221620782	6.047737439	2.82E-185	0.657656796	-0.234072555	1	0.088924768	-3.174490551	2.90E-06	0.068394537	-3.530507994	1.14E-06	0.493870556	-0.622912485	1	0.789475519	0.03831529	1	1.49325079	0.923961373	0.724684135
ENSBTAG00000005456	TTK	0.048022519	-3.323510698	2.44E-19	1.004156675	1.561359413	7.33E-12	0.062325215	-2.952953353	3.66E-17	1.02298842	1.545090518	1.77E-10	0.13978904	-1.716572017	0.000134064	0.454790547	0.081228568	1	0.548930468	0.353899526	0.719337991	0.031567589	-3.821914988	4.44E-11	0.504542746	0.246606983	0.639596221	0.430153428	-0.005658015	1	0.40828899	-0.087062371	1	0.031197508	-3.801694648	2.21E-08	0.329247037	-0.353242946	1	0.324441994	-0.385911699	1	0.271500144	-0.446175113	0.725512415
ENSBTAG00000014453	PLK1	0.128647482	-3.203807411	2.73E-19	2.815554411	1.85473379	1.98E-17	0.140652851	-3.081691469	4.26E-19	2.62526978	1.635912963	4.35E-12	0.214462673	-2.41242142	1.52E-08	0.719767884	-0.618191227	0.472472014	1.484927292	0.483984825	0.636021056	0.081549606	-3.771909735	1.53E-11	1.371972501	0.412383734	0.351162506	0.875601199	-0.285845092	1	0.628210459	-0.791169897	0.780381367	0.147588212	-2.893607695	5.15E-06	0.897946465	-0.24110081	1	0.886808117	-0.259932157	1	1.221750646	0.184945878	0.724684135
ENSBTAG00000009983	KIF23	0.087233566	-3.228720719	3.15E-19	1.939411711	1.848177057	3.50E-17	0.080012101	-3.362941151	3.04E-21	1.837002277	1.662604691	1.94E-12	0.212073117	-1.883642596	1.57E-05	0.639370811	-0.22160985	1	1.252687478	0.776855884	0.480734207	0.092072136	-3.060736428	1.75E-08	0.691347723	-0.094550536	1	0.49515439	-0.578269373	1	0.516337364	-0.530800347	1	0.077993771	-3.27187425	4.53E-07	0.493870556	-0.551641333	1	0.443404059	-0.710666673	1	0.543000287	-0.35990619	0.724684135
ENSBTAG00000002117	KIF18A	0.018944663	-3.580114479	3.15E-19	0.438636118	1.379123922	1.69E-08	0.023161398	-3.301916309	3.65E-18	0.525225598	1.698416302	4.35E-12	0.09558225	-1.175092074	0.037729706	0.195521877	-0.084472529	1	0.372991215	0.879537166	0.458445678	0.035075099	-2.59671225	6.09E-06	0.245498987	0.281323102	0.591465779	0.133825511	-0.621434393	1	0.214184388	0.061839547	1	0.020398371	-3.316302944	2.54E-06	0.13469197	-0.486767589	1	0.183850463	-0.100531443	1	0.33937518	0.88665324	0.724684135
ENSBTAG00000024726	HJURP	0.057274564	-3.289829875	3.75E-19	1.045196449	1.329127269	2.56E-08	0.045901679	-3.619278957	8.63E-23	1.352541737	1.811151666	7.37E-15	0.148152487	-1.855711093	2.81E-05	0.516158727	0.040109959	1	0.914884113	0.870648556	0.437652766	0.052612649	-3.316755273	3.18E-09	0.546870158	0.13183676	0.913521738	0.724569551	0.543386728	0.954409037	0.401595727	-0.341870732	1	0.055195591	-3.218477921	1.05E-06	0.823117593	0.716128657	1	0.259553595	-0.916760482	1	0.475125251	0.013387873	0.724684135
ENSBTAG00000004943	CCNA2	0.110143392	-3.180105971	4.13E-19	2.084368711	1.568101058	2.73E-12	0.145706247	-2.778777137	2.07E-16	1.937413053	1.368418541	2.98E-08	0.305265811	-1.639627259	0.000222474	0.85772736	-0.069687451	1	0.71783215	-0.317324366	1	0.064888934	-3.851470985	8.15E-12	1.352784074	0.672510167	0.050334113	0.867954027	-0.045995391	1	0.813709438	-0.145591332	1	0.10679147	-3.110617805	1.12E-06	0.77822027	-0.197214677	1	0.627254522	-0.506690791	1	0.746625395	-0.231790481	0.724684135
ENSBTAG00000009383	KIF11	0.115430275	-3.166421151	5.04E-19	2.203722916	1.607408408	6.00E-13	0.122965966	-3.082286102	4.16E-19	2.358795028	1.691124323	4.77E-13	0.338719598	-1.540701715	0.000644311	0.781611787	-0.278263607	1	0.809320562	-0.198992156	1	0.089441503	-3.445622081	3.39E-10	1.094304681	0.261663693	0.657764916	0.69206907	-0.434911102	1	0.872036437	-0.097269577	1	0.051595879	-4.200976586	3.28E-10	0.688425623	-0.425094652	1	0.594810323	-0.636300912	1	0.678750359	-0.411333187	0.724684135
ENSBTAG00000009812	CXCL5	0.160809352	-3.345292844	6.04E-19	0.132908626	-3.654227584	1.28E-24	0.135599455	-3.602046039	5.97E-22	0.14375047	-3.513510966	1.70E-20	0.206696615	-2.933765341	9.61E-11	0.124163528	-3.707978911	5.73E-19	4.398481314	1.603225052	0.181030268	0.523495858	-1.538359248	0.011384526	13.02216926	5.561099839	9.82E-168	1.785614672	0.296333818	1	0.210359667	-2.861893521	7.24E-06	0.152387829	-3.31050018	1.13E-06	1.107467307	-0.403959001	1	1.730357302	0.237907523	1	2.715001436	0.834866214	0.724684135
ENSBTAG00000040065	RAD51AP1	0.077540948	-3.160240476	1.59E-18	1.08322413	0.982022413	0.000194212	0.109069127	-2.669381084	3.45E-15	0.981794256	0.7770095	0.017005856	0.385913334	-0.74156297	0.453941196	1.175985598	1.084857442	0.000329822	0.950071964	0.61504202	0.56713323	0.068396444	-3.249719268	3.40E-09	0.741576251	0.280104679	0.620988739	0.780011549	0.335348921	0.994129097	1.000164597	0.734615865	0.435549906	0.091192716	-2.810414887	1.17E-05	0.733322947	0.243832804	1	0.34607146	-0.822412166	1	0.271500144	-0.971723252	0.766808376
ENSBTAG00000001343	DEPDC1	0.022909826	-3.41027003	1.64E-18	0.527869388	1.621745304	2.26E-12	0.039163818	-2.643502763	9.88E-14	0.481885904	1.382298344	6.73E-08	0.093790083	-1.308104061	0.011386176	0.209317825	-0.087294828	1	0.337803365	0.635611584	0.572954131	0.027183202	-3.059058081	1.16E-07	0.262429952	0.276083577	0.592929244	0.25426847	0.214565569	1	0.209403486	-0.078942721	1	0.015598754	-3.781355981	1.24E-07	0.239452391	0.180262349	1	0.194665197	-0.123293371	1	0.135750072	-0.215184594	0.736523304
ENSBTAG00000008216	RRM2	0.252889228	-3.06090448	1.92E-18	2.196192683	0.253517269	0.865105814	0.303624867	-2.800657127	6.76E-17	2.231779687	0.275143252	0.867133829	1.807101912	-0.072281606	1	3.587422086	1.093295304	0.000236138	2.012745049	0.085384211	0.87097791	0.262186368	-2.924262157	3.10E-08	3.753030494	1.141692157	4.24E-05	2.175620447	0.206683104	1	4.026475258	1.187002868	0.008954107	0.215982749	-3.181491294	4.85E-07	2.214934615	0.217022908	1	1.773616235	-0.099887598	1	2.443501292	0.314666678	0.724684135
ENSBTAG00000004221	ESM1	0.017182369	-3.7327597	2.85E-18	0.028238377	-3.053684003	4.53E-16	0.021898049	-3.396170579	5.54E-17	0.066082306	-1.778944852	4.63E-06	0.057946739	-1.929078042	0.000135382	0.038057786	-2.574653472	2.69E-09	0.71079458	1.801175163	0.146021851	0.029813834	-2.840845324	5.06E-06	1.645125397	4.75603072	1.62E-106	0.344122742	0.756217007	0.951640972	0.163506832	-0.360303233	1	0.0287977	-2.853393161	0.000114229	0.149657744	-0.362452837	1	0.302812528	0.57796781	1	0.33937518	0.87311358	0.724684135
ENSBTAG00000008934	ESPL1	0.046260225	-3.259460695	3.52E-18	1.012439932	1.755609361	7.35E-15	0.094330056	-2.224700322	7.22E-11	0.851775174	1.341585834	1.71E-07	0.130828205	-1.694479181	0.000252777	0.333957075	-0.285223955	1	1.597528413	2.029660833	0.078445363	0.033321344	-3.62842142	5.62E-10	0.436818888	0.144819134	0.838358294	0.359417086	-0.150769556	1	0.325101303	-0.309008426	1	0.063594921	-2.679528495	5.42E-05	0.434007458	0.148374155	1	0.227109396	-0.765316304	1	0.407250215	0.156320738	0.724684135
ENSBTAG00000001911	ENSBTAG00000001911	0.004846309	-4.505644868	3.87E-18	0.009789304	-3.585139617	3.96E-16	0.003368931	-4.997017915	7.89E-21	0.0072948	-3.959636754	7.00E-16	0.011350392	-3.273501299	1.53E-08	0.005708668	-4.264408161	7.21E-15	0.753020001	2.8952554	0.010997971	0.016660672	-2.676539161	0.00014186	0.948134019	5.572641925	2.12E-125	0.156767027	0.594541762	0.954409037	0.021992147	-2.278226769	0.007835323	0.011999042	-3.068953639	0.000301762	0.044897323	-0.852911351	1	0.064888399	-0.508121326	1	0	-0.743193509	1
ENSBTAG00000033441	SHCBP1	0.036127033	-3.208296721	5.01E-18	0.676968017	1.490021567	1.34E-10	0.047165028	-2.829683925	7.72E-16	0.71360308	1.545935714	2.14E-10	0.102750919	-1.636170735	0.000343377	0.307316625	0.030624227	1	0.204089533	-0.529401789	1	0.022798815	-3.756244862	1.56E-10	0.417630461	0.527401662	0.15351533	0.145296269	-1.059771085	0.954409037	0.318408041	0.084541303	1	0.033597317	-3.176103485	2.00E-06	0.104760421	-1.358892766	1	0.291997795	-0.011210299	1	0.475125251	0.752965044	0.724684135
ENSBTAG00000002444	MKI67	0.686413618	-2.940715203	5.01E-18	11.83903355	1.72853514	2.94E-15	0.742428073	-2.833322884	9.43E-18	11.21382399	1.553227706	5.71E-11	1.234803191	-2.035335317	6.56E-07	4.103105091	-0.227386325	1	10.9926845	1.223525366	0.364417183	0.373549808	-3.740991468	9.11E-12	4.540320349	-0.063822827	1	6.716128848	0.52235022	0.968484537	3.577070515	-0.422657579	1	0.471562336	-3.381020161	1.00E-07	6.584940746	0.462799736	1	2.043984563	-1.220727382	1	3.461626831	-0.515793712	0.724684135
ENSBTAG00000005010	MXD3	0.066086035	-3.11607293	7.69E-18	1.209732057	1.585125116	2.85E-12	0.074958705	-2.940664647	3.72E-17	1.377858984	1.800739695	1.06E-14	0.135607317	-2.020618388	3.95E-06	0.533760454	0.056572698	1	0.591155889	0.205576397	0.81018079	0.044720752	-3.582340798	2.87E-10	0.435125791	-0.266964049	0.784201465	0.581185075	0.179658938	1	0.330838385	-0.66734533	0.993708397	0.093592525	-2.498462599	0.000103611	0.478904782	-0.084167193	1	0.410959859	-0.30698232	1	0.814500431	0.680790737	0.724684135
ENSBTAG00000040390	EBF2	0.002202868	-4.746046411	1.12E-17	0.010542327	-2.705057329	5.09E-11	0.003368931	-4.231626286	8.84E-17	0.015447812	-2.126703026	8.19E-07	0.010753003	-2.577787704	5.38E-06	0.00808728	-3.021406893	2.23E-09	0.204089533	1.765778876	0.18369811	0.012276285	-2.326761284	0.000877034	0.538969041	5.28380267	7.17E-116	0.105148616	0.796632706	0.951640972	0.021992147	-1.505246677	0.17122382	0.003599712	-3.770494988	3.03E-05	0.029931549	-0.506263764	1	0	-2.55835291	1	0	0.018212944	1
ENSBTAG00000021874	KIF14	0.014538928	-3.486419684	1.23E-17	0.356180058	1.618991548	9.67E-12	0.018108002	-3.183502008	1.82E-16	0.341568281	1.477587284	4.51E-09	0.048388514	-1.702076309	0.000474312	0.152706868	0.037844665	1	0.401141496	1.456934108	0.227869926	0.01403004	-3.408713928	3.28E-08	0.161972895	0.131799577	0.875644097	0.118531167	-0.323351873	1	0.1262158	-0.248137865	1	0.07199425	-1.06629724	0.214614032	0.089794647	-0.536885939	1	0.054073666	-1.224494128	1	0.067875036	-0.234919881	0.812354105
ENSBTAG00000050061	INCENP	0.020266384	-3.314939428	1.46E-17	0.483441009	1.838124227	5.00E-16	0.025266979	-3.007118505	3.49E-16	0.466438093	1.692113787	4.35E-12	0.044206791	-2.139533618	2.88E-06	0.156036924	-0.259666571	1	0.232239813	0.37299324	0.744030099	0.021921937	-3.091438279	1.22E-07	0.180596956	-0.024578893	1	0.137649097	-0.41049702	1	0.121434899	-0.61650042	1	0.027597796	-2.731202141	6.01E-05	0.164623519	-0.055693126	1	0.097332598	-0.784262336	1	0	-1.533339141	1
ENSBTAG00000009396	EXO1	0.017182369	-3.408717631	1.53E-17	0.153993281	-0.13031308	1	0.013054606	-3.808507295	6.21E-21	0.228284329	0.530748408	0.246056788	0.185787998	0.175039923	1	0.354888858	1.307790545	4.95E-06	0.394103926	1.27056222	0.294202676	0.022798815	-2.895329346	1.02E-06	0.253964469	0.688216446	0.04642546	0.240885919	0.556920975	0.954409037	0.401595727	1.392632433	0.000824453	0.008399329	-4.182349234	4.35E-08	0.13469197	-0.179030802	1	0.118962065	-0.379793073	1	0.135750072	0.192676153	0.724684135
ENSBTAG00000005825	NEIL3	0.015860648	-3.448570809	2.01E-17	0.265440741	0.911664973	0.001361103	0.01600242	-3.445841434	3.60E-18	0.33126974	1.301803341	7.51E-07	0.114101311	-0.506646777	1	0.207890658	0.450080485	0.813113133	0.281502804	0.861942116	0.47442436	0.025429447	-2.668119908	6.82E-06	0.236469139	0.65375228	0.0680039	0.160590613	0.033075964	1	0.223746191	0.536371517	0.87561802	0.010799137	-3.786156967	4.64E-07	0.119726195	-0.258159736	1	0.140591531	-0.083040161	1	0.203625108	0.681379352	0.724684135
ENSBTAG00000005250	BGN	0.074456933	-3.141755237	7.70E-17	0.092998387	-2.846968129	1.42E-16	0.069484193	-3.250814557	1.70E-18	0.097836141	-2.747500579	8.11E-14	0.094984861	-2.741086523	2.07E-09	0.080872796	-3.008120822	1.24E-13	3.462484491	2.597458193	0.013604103	0.149069172	-2.046768268	0.000370256	4.776789489	4.887635411	1.55E-125	1.357373038	1.253085203	0.951640972	0.097530391	-2.654551159	4.65E-05	0.103191758	-2.55603097	0.000156298	0.733322947	0.320587333	1	0.335256727	-0.790293657	1	0.407250215	-0.409584437	0.724684135
ENSBTAG00000006551	ESCO2	0.12600404	-2.92874316	8.22E-17	1.633307707	1.146411393	3.51E-06	0.267408864	-1.823412218	1.89E-08	1.290321384	0.684077493	0.054296961	0.468353025	-0.942446921	0.142456315	1.668358209	1.129016324	0.000139126	1.034522805	0.263908684	0.765368419	0.064888934	-3.79726506	1.53E-11	0.85049879	-0.022446417	1	0.674862933	-0.361736716	1	1.317616458	0.655630549	0.614149496	0.310775178	-1.510755364	0.024436485	0.718357172	-0.256643287	1	0.854363918	-0.011399451	1	1.425375754	0.697559606	0.724684135
ENSBTAG00000004085	ASF1B	0.056393417	-3.001337785	1.27E-16	0.830208275	1.292998847	8.46E-08	0.079169868	-2.513116942	1.75E-13	0.756513668	1.076835333	9.36E-05	0.225215676	-0.913010049	0.192798775	0.520440228	0.404542227	0.982251717	0.274465234	-0.546893776	1	0.048228262	-3.132555894	1.96E-08	0.5903263	0.603751346	0.102893266	0.458830323	0.1799698	1	0.463747447	0.200190606	1	0.059995208	-2.791878419	1.94E-05	0.463939007	0.212623038	1	0.497477724	0.305307918	1	0.543000287	0.490116828	0.724684135
ENSBTAG00000007102	GTSE1	0.092079876	-2.949811512	1.55E-16	1.442416281	1.498908367	7.10E-11	0.124650431	-2.513411523	1.08E-13	1.344817831	1.310695332	2.38E-07	0.2676303	-1.33498464	0.006611096	0.660302593	0.05025321	1	1.513077572	1.252031516	0.278879862	0.105225298	-2.669475076	9.27E-07	0.768101429	0.292568036	0.60055158	0.711187	0.157041281	1	0.589963247	-0.123820718	1	0.10079195	-2.706700157	2.76E-05	0.808151819	0.342177726	1	0.519107191	-0.289893217	1	0.882375467	0.47516539	0.724684135
ENSBTAG00000010384	CDC6	0.022469252	-3.178248561	1.91E-16	0.078690943	-1.357538905	6.44E-05	0.021898049	-3.224539801	1.55E-17	0.100410776	-0.967406704	0.021058219	0.324382261	0.918388149	0.020593213	0.553740791	1.989277036	1.60E-15	0.260390094	0.523918712	0.639276456	0.029813834	-2.670048645	3.51E-06	0.285568937	0.708834138	0.035310187	0.195002887	0.08744207	1	0.529723888	1.681956396	5.13E-06	0.017998562	-3.33061442	2.42E-06	0.194555067	0.156398702	1	0.118962065	-0.531522644	1	0.067875036	-0.544016694	0.853293052
ENSBTAG00000020227	FAM72A	0.005286883	-3.931721143	2.09E-16	0.170559795	1.450862236	1.71E-08	0.007158977	-3.531490645	2.29E-15	0.197817811	1.704327501	5.86E-11	0.016129505	-2.320525135	1.27E-05	0.050902289	-0.655505965	0.691701283	0.077413271	0.112295632	0.941023175	0.005261265	-3.744307344	1.96E-07	0.137705179	0.952483525	0.004293469	0.10132503	0.421983887	0.98954227	0.053546097	-0.536484642	1	0.016798658	-2.160360749	0.00541252	0.119726195	0.777248576	1	0.054073666	-0.275365244	1	0.135750072	1.298263327	0.724684135
ENSBTAG00000016726	KIF15	0.081065536	-2.919066006	2.17E-16	1.27938672	1.557749509	6.54E-12	0.073695356	-3.066458964	2.13E-18	1.232821196	1.42999543	6.19E-09	0.24194257	-1.264487703	0.011717023	0.586565632	0.098162583	1	0.893771403	0.702094486	0.522135768	0.056120159	-3.358342355	1.64E-09	0.645069753	0.249224927	0.687916065	0.498977976	-0.147927729	1	0.533548609	-0.051764515	1	0.040796742	-3.779018296	1.70E-08	0.50883633	-0.09853875	1	0.248738862	-1.109080363	1	0.271500144	-0.798158636	0.748614395
ENSBTAG00000026971	CDCA5	0.01233606	-3.371887972	2.18E-16	0.169053748	0.627523305	0.080692873	0.013054606	-3.3021025	9.54E-17	0.202967082	0.938843507	0.001870917	0.093790083	-0.350168121	1	0.23690972	1.201798823	6.14E-05	0.133713832	0.246692737	0.827138768	0.008768775	-3.695708232	1.03E-08	0.16253726	0.524300312	0.18602451	0.086030686	-0.436896037	1	0.215140568	0.943355567	0.1163273	0.01439885	-2.976865108	3.86E-05	0.029931549	-1.418309149	1	0.043258933	-1.144764628	1	0.203625108	1.109229503	0.724684135
ENSBTAG00000001920	POLQ	0.036127033	-3.081121135	4.45E-16	0.479675892	0.976615493	0.000406147	0.043374981	-2.824055203	5.88E-15	0.51149421	1.068349233	0.000176065	0.18459322	-0.626042872	0.801538526	0.37582064	0.508139644	0.574801	1.456777011	2.439950446	0.026350679	0.036828854	-2.954583424	3.29E-07	0.354985892	0.403101598	0.351198855	0.326916605	0.253378912	1	0.397771006	0.562558611	0.787207997	0.0287977	-3.265408158	2.71E-06	0.224486616	-0.23125823	1	0.108147331	-1.237906952	1	0.271500144	0.199510344	0.724684135
ENSBTAG00000048666	ENSBTAG00000048666	0.012776633	-3.376630585	4.70E-16	0.181102122	0.684673576	0.046782821	0.014317955	-3.225286903	6.03E-16	0.24373214	1.21054978	1.01E-05	0.053765016	-1.247531249	0.031874309	0.254511446	1.265887773	2.00E-05	0.119638692	0.039377971	0.945336707	0.011399407	-3.399768142	9.76E-08	0.125853504	0.050182993	1	0.055441997	-1.118324857	0.954409037	0.260081043	1.189046057	0.013511931	0.022798179	-2.40491074	0.000799047	0.104760421	-0.053831183	1	0.108147331	-0.057243261	1	0.135750072	0.639887223	0.724684135
ENSBTAG00000002331	DLGAP5	0.198698679	-2.801108503	5.27E-16	3.184159355	1.773136346	4.53E-16	0.336050824	-2.031741877	3.36E-10	2.702937944	1.374273567	2.28E-08	0.482092973	-1.451395278	0.001566282	1.05372496	-0.268740163	1	1.456777011	0.224578055	0.787923555	0.091195258	-3.842006742	6.05E-12	1.486538695	0.283734233	0.609497219	0.621332729	-1.022046271	0.954409037	1.124468037	-0.1559211	1	0.118790512	-3.436158106	8.53E-08	0.389110135	-1.64909992	1	1.124732247	-0.149691797	1	0.814500431	-0.592542263	0.724684135
ENSBTAG00000014435	TCF19	0.043616783	-2.956945911	5.75E-16	0.33434238	0.148598552	1	0.034110422	-3.321958949	1.34E-19	0.594311645	1.159033616	1.58E-05	0.296902364	-0.047583892	1	0.624147696	1.225791709	2.45E-05	0.239277383	-0.327302886	1	0.048228262	-2.718080301	1.02E-06	0.344827313	0.19080377	0.754093219	0.477948253	0.667548529	0.951640972	0.516337364	0.812931028	0.236762898	0.041996646	-2.883951907	1.34E-05	0.26938394	-0.129693707	1	0.259553595	-0.196983714	1	0.203625108	-0.269480103	0.72492632
ENSBTAG00000002298	CKAP2L	0.090758155	-2.836013464	8.31E-16	1.167562748	1.253910198	1.90E-07	0.069905309	-3.225260564	6.53E-20	1.265862349	1.371954415	3.31E-08	0.275396358	-1.154213649	0.029631652	0.722622218	0.350303098	1	0.992297384	0.772159205	0.486572169	0.068396444	-3.156144522	8.26E-09	0.743269347	0.388782556	0.401711826	0.577361489	-0.015275738	1	0.727653211	0.338226988	1	0.062395016	-3.258854106	5.52E-07	0.463939007	-0.30902949	1	0.313627261	-0.867107095	1	0.407250215	-0.39306534	0.724684135
ENSBTAG00000046332	ACTA1	0.147592145	-3.466415093	1.46E-15	0.119730717	-3.802424219	3.13E-20	0.539450007	-1.558097948	5.67E-05	0.108992894	-3.9118946	1.11E-18	0.106932642	-3.885629228	1.23E-12	0.165551371	-3.285922664	2.58E-12	2.589825798	0.830959872	0.47894553	0.150822927	-3.346258052	6.59E-07	0.134883352	-3.557604427	4.62E-13	0.650009624	-1.18653582	0.960297367	0.109004555	-3.806029087	6.42E-07	27.92776938	6.822804336	2.95E-157	1.706098284	0.218596986	1	3.449899872	1.241064296	1	7.059003734	2.19868853	0.724684135
ENSBTAG00000007094	MINAR1	0.001762294	-4.797768283	2.30E-15	0.003765117	-3.912021784	1.10E-14	0.00463228	-3.599053929	2.04E-12	0.006007482	-3.241950222	2.17E-10	0.014934727	-1.900017744	0.003356469	0.002378612	-4.408285804	2.58E-12	0.267427664	2.374754831	0.07347619	0.014906917	-1.84499767	0.022909621	0.45657168	5.151164901	5.02E-95	0.112795788	1.124907908	0.951640972	0.023904508	-1.170658689	0.617994693	0.005999521	-2.970389805	0.00155736	0.059863098	0.445649884	1	0.043258933	-0.019058161	1	0	0.229971448	1
ENSBTAG00000021673	NDC80	0.1000102	-2.779065225	2.30E-15	1.547463042	1.723824356	6.78E-15	0.112016941	-2.620569668	8.32E-15	1.558083454	1.674696334	1.24E-12	0.229994789	-1.510205481	0.000988067	0.504741391	-0.326286207	1	0.943034394	0.613775782	0.567779308	0.059627669	-3.436748756	5.97E-10	0.606692899	-0.031271115	1	0.367064258	-0.765555027	0.984104183	0.486695774	-0.363170194	1	0.0575954	-3.456480602	1.31E-07	0.50883633	-0.263147864	1	0.367700927	-0.727855909	1	0.610875323	0.038288721	0.724684135
ENSBTAG00000050477	ENSBTAG00000050477	0.02467212	-3.007952156	2.30E-15	0.22741306	0.394446207	0.494218293	0.02400363	-3.056622116	1.76E-16	0.350150399	1.156804214	1.40E-05	0.112906533	-0.723742371	0.526171298	0.401985368	1.391450265	3.87E-07	0.112601122	-0.609844075	1	0.014906917	-3.601044006	3.14E-09	0.194706093	0.12177523	0.88863238	0.130001925	-0.468889986	1	0.371954138	1.134634622	0.016342354	0.025197987	-2.83330806	3.53E-05	0.089794647	-0.811217144	1	0.108147331	-0.622168008	1	0.135750072	0.076569717	0.724684135
ENSBTAG00000002224	UHRF1	0.276239627	-2.711641923	2.76E-15	2.053871264	0.396849543	0.489534793	0.253933141	-2.843184321	3.33E-17	1.886349453	0.243886074	0.932867722	1.930164059	0.270669319	1	3.319114692	1.225675603	1.33E-05	2.702426919	0.731436264	0.498589071	0.304276487	-2.49016026	2.18E-06	2.215698905	0.498074434	0.208629586	1.850615635	0.188681533	1	3.556034548	1.228476919	0.005433707	0.173986104	-3.276209922	2.57E-07	1.721064059	0.071024297	1	1.049029115	-0.637795304	1	1.018125539	-0.679761622	0.724684135
ENSBTAG00000014239	CCNB1	0.257735537	-2.717265711	2.90E-15	4.231991386	1.960963761	8.10E-20	0.255617607	-2.737166399	3.31E-16	3.529395871	1.501694649	3.67E-10	0.4970277	-1.707840373	1.00E-04	0.882940643	-0.862304532	0.078004085	1.35825103	-0.171368337	1	0.152576682	-3.395103137	4.19E-10	1.913763369	0.364939433	0.442856417	1.022809261	-0.590160203	1	0.970523008	-0.682580311	0.862364652	0.163186966	-3.273636479	2.86E-07	1.04760421	-0.54473208	1	1.578951038	0.044274452	1	2.511376328	0.663663841	0.724684135
ENSBTAG00000005607	ERCC6L	0.058155711	-2.820705528	3.61E-15	0.607313355	0.866581933	0.002192895	0.058114052	-2.829985965	5.26E-16	0.545822681	0.653691427	0.083567854	0.323187483	-0.216761108	1	0.706923381	1.100414077	0.000296482	0.647456449	0.815356714	0.473535696	0.063135179	-2.612189269	1.88E-06	0.452621121	0.319039233	0.496740204	0.294416124	-0.33697652	1	0.669326212	0.919282695	0.106164151	0.040796742	-3.203999071	1.39E-06	0.224486616	-0.65669259	1	0.151406264	-1.214714488	1	0.33937518	0.038084532	0.724684135
ENSBTAG00000017844	STIL	0.017182369	-3.080105579	6.78E-15	0.233060736	0.995051149	0.000249839	0.017265769	-3.082747789	9.88E-16	0.259179952	1.165428556	1.84E-05	0.077660578	-0.825640297	0.370449944	0.207414936	0.744195734	0.077022023	0.281502804	1.116574418	0.354593272	0.035075099	-1.957508836	0.000994168	0.146170661	0.152618451	0.836256865	0.149119855	0.182754544	1	0.217052929	0.762529061	0.372144122	0.008399329	-3.85745896	4.00E-07	0.149657744	0.284163925	1	0.064888399	-0.834902659	1	0	-1.069107739	1
ENSBTAG00000016619	MIS18A	0.084149551	-2.729265376	7.00E-15	0.974412251	1.188323663	1.23E-06	0.112016941	-2.316164463	3.04E-12	0.803286209	0.797826333	0.012782986	0.341109154	-0.605403106	0.790555848	0.82918402	0.839274097	0.019511967	0.351878505	-0.502799296	1	0.065765811	-2.997595961	3.33E-08	0.694733915	0.520956883	0.18596014	0.328828398	-0.624206445	1	0.668370032	0.435910605	1	0.081593483	-2.661516211	3.18E-05	0.179589293	-1.397578554	1	0.519107191	0.057414573	1	0.407250215	-0.179708729	0.724684135
ENSBTAG00000018775	TPX2	0.700071399	-2.586225583	7.29E-15	9.171824747	1.653688538	5.73E-14	0.608091967	-2.801333672	1.40E-17	9.2081831	1.602607329	8.56E-12	1.479732706	-1.43835876	0.00092385	3.0103709	-0.367857357	1	3.722874584	-0.032236448	0.94146259	0.649766216	-2.616613136	5.69E-07	4.473160856	0.266660642	0.639872617	3.024456544	-0.334428582	1	2.757623995	-0.481146164	1	0.410367224	-3.261324584	2.25E-07	2.693839396	-0.506317258	1	2.433314956	-0.649789257	1	2.239876185	-0.809788263	0.724684135
ENSBTAG00000016746	UBE2C	0.974108158	-2.587290748	7.65E-15	12.47119668	1.602549122	5.07E-13	1.172808953	-2.320173502	3.63E-13	12.36296954	1.528638451	1.22E-10	1.893125937	-1.564578017	0.000234715	5.712473731	0.130126048	1	2.74465234	-0.953440024	1	0.631351789	-3.139923287	3.18E-09	5.576495385	0.088807664	0.978712923	3.202253294	-0.737170065	0.960297367	3.962411177	-0.433786507	1	0.927525918	-2.560278078	3.81E-05	2.648942073	-1.008861695	1	4.671964716	-0.187403783	1	5.2942528	-0.070381267	0.724684135
ENSBTAG00000021686	MELK	0.084590125	-2.729117489	1.09E-14	0.914170381	1.053876816	4.40E-05	0.08927666	-2.657995428	7.10E-15	0.989089056	1.171465374	9.26E-06	0.336330042	-0.634809206	0.720073956	0.678855764	0.485302115	0.673844217	0.886733833	0.81754765	0.466239658	0.089441503	-2.562353759	2.21E-06	0.704892494	0.536544184	0.169409314	0.378535016	-0.42572789	1	0.682712737	0.460994302	0.965663729	0.059995208	-3.107727891	2.03E-06	0.419041684	-0.244997838	1	0.410959859	-0.280783259	1	0.610875323	0.32795871	0.724684135
ENSBTAG00000009035	CENPE	0.529128855	-2.55283506	2.48E-14	7.321646307	1.825131795	6.48E-17	0.447225532	-2.808162453	2.13E-17	6.789742355	1.597911044	1.46E-11	0.948056441	-1.65089643	0.000100359	1.731629279	-0.759704127	0.178890501	7.839853094	1.496842395	0.248845547	0.372672931	-2.984287212	2.11E-08	3.063940233	0.144096811	0.88292286	2.219591686	-0.344463689	1	1.762240299	-0.698748035	0.827261798	0.253179778	-3.520361681	4.28E-08	2.454387005	-0.202757374	1	1.546506839	-0.86443284	1	2.443501292	-0.251240474	0.724684135
ENSBTAG00000024449	CENPF	1.886095443	-2.544793229	2.58E-14	26.50755245	1.874447082	5.45E-18	2.070628948	-2.414212019	6.89E-14	25.06493272	1.682846627	5.73E-13	3.098059675	-1.771651185	2.15E-05	6.466017901	-0.678541435	0.315879153	30.54305425	1.635889213	0.199561877	1.008409107	-3.378070317	7.53E-11	7.120034994	-0.519814857	0.293279242	10.31985867	0.05668007	1	6.08130673	-0.738684772	0.743811749	1.033117484	-3.320875153	1.65E-07	10.46107632	0.058028384	1	5.147812975	-0.961754694	1	7.12687877	-0.557953212	0.724684135
ENSBTAG00000032455	HIST2H2BF	0.010573766	-3.203787148	2.75E-14	0.132908626	0.669854533	0.0583291	0.015160188	-2.70216324	3.79E-12	0.185802846	1.267424024	3.13E-06	0.037038122	-1.348335402	0.016427241	0.170308594	1.080609217	0.000844312	0.035187851	-1.118227829	1	0.006138142	-3.775595056	2.72E-08	0.111180001	0.335730462	0.510410285	0.068824548	-0.369670432	1	0.184542799	1.122028443	0.02854777	0.015598754	-2.486649354	0.00072409	0.014965774	-1.623601804	1	0.054073666	-0.499996138	1	0.067875036	0.488256006	0.740531051
ENSBTAG00000002981	PIMREG	0.169620824	-2.623599091	3.03E-14	2.352445034	1.719009319	6.78E-15	0.23919407	-2.12285061	8.55E-11	2.038252935	1.366809755	3.31E-08	0.338719598	-1.5618512	0.000544505	0.595128634	-0.728061311	0.228553213	1.224537198	0.37840822	0.69708671	0.113117196	-3.128165496	7.34E-09	1.395675851	0.638407804	0.070687145	0.825894581	-0.195662124	1	0.664545311	-0.528634386	1	0.171586295	-2.502931178	7.43E-05	0.613596751	-0.608298589	1	0.811104985	-0.214655309	1	1.357500718	0.501868704	0.724684135
ENSBTAG00000018383	ATAD5	0.054631122	-2.743316177	4.44E-14	0.348649824	0.087617004	1	0.049691726	-2.889869548	5.26E-16	0.420952869	0.402547505	0.572610078	0.385913334	0.245247607	1	0.653642481	1.167118077	0.000104214	0.992297384	1.605098493	0.175374918	0.085933993	-1.999404545	0.000370256	0.426660309	0.409940072	0.330704308	0.487507218	0.580110389	0.954409037	0.737215014	1.261666291	0.003648273	0.07199425	-2.230285809	0.000764008	0.434007458	0.419203214	1	0.20547993	-0.632764251	1	0.407250215	0.426247892	0.724684135
ENSBTAG00000015280	KIF2C	0.064323741	-2.681504055	4.95E-14	0.954457132	1.773096751	1.58E-15	0.069484193	-2.57638254	5.81E-14	0.792558562	1.331342508	1.52E-07	0.175034995	-1.161291795	0.031253674	0.319685405	-0.248367456	1	0.6826443	0.883896351	0.433561199	0.042090119	-3.200231997	1.18E-08	0.452056756	0.308065461	0.519465202	0.160590613	-1.22626711	0.951640972	0.34804963	-0.104747767	1	0.025197987	-3.884472086	1.70E-08	0.119726195	-1.496142388	1	0.237924129	-0.604366722	1	0.407250215	0.252739121	0.724684135
ENSBTAG00000018563	SFRP2	0.02599384	-3.780574914	4.95E-14	0.023720236	-3.946727799	5.63E-17	0.028214793	-3.672293026	2.96E-14	0.065224094	-2.451133679	2.01E-07	0.067504964	-2.352290914	0.000152246	0.038057786	-3.217588657	1.96E-09	2.216834582	2.838760909	0.026350679	0.305153365	-0.083834694	1	2.62655698	4.92340369	1.07E-83	0.342210949	0.091409373	1	0.045896655	-2.856567501	0.001977818	0.026397892	-3.609704986	0.000119496	0.419041684	0.406607313	1	0.151406264	-1.012487645	1	0.33937518	0.240034898	0.724684135
ENSBTAG00000001938	CKS2	0.700952546	-2.479995554	6.91E-14	8.048313867	1.524931056	9.85E-12	0.784960822	-2.319829811	3.47E-13	8.099373504	1.485673561	5.01E-10	1.350696669	-1.468990592	0.000666115	3.58837353	0.026784798	1	2.167571592	-0.712627524	1	0.55418657	-2.745105055	1.57E-07	4.346742987	0.33496312	0.498826157	1.785614672	-1.003871577	0.951640972	2.889576877	-0.304237616	1	0.626349973	-2.546338922	4.15E-05	1.122433082	-1.658241377	1	4.379966922	0.301571283	1	4.615502441	0.314062888	0.724684135
ENSBTAG00000016406	MCM10	0.135696659	-2.549645271	1.34E-13	0.861458745	0.310602559	0.719426839	0.119175919	-2.748245392	4.53E-16	0.965059126	0.497823738	0.30181172	0.828578629	0.228608561	1	1.387682035	1.128147641	0.000135144	0.830433272	0.213815052	0.797281444	0.185898027	-2.010333105	0.000177813	1.034481939	0.593808508	0.103259705	0.546772801	-0.400269387	1	1.564310976	1.225565937	0.006068568	0.087593004	-3.073872455	1.59E-06	0.404075909	-0.800364612	1	0.432589326	-0.713500017	1	0.678750359	-0.038226934	0.724684135
ENSBTAG00000018643	PRC1	0.515471074	-2.451564115	1.39E-13	6.522311991	1.777899978	3.86E-16	0.727689002	-1.946434413	6.15E-10	5.570223441	1.390322583	1.24E-08	0.79631962	-1.769133455	2.03E-05	1.949985828	-0.42641957	1	3.054305425	0.257985643	0.764951245	0.318306527	-3.075305286	6.92E-09	2.878828353	0.196206766	0.779813008	3.097104678	0.289675177	1	1.527019945	-0.771163194	0.686991165	0.421166361	-2.647484674	2.22E-05	2.918326012	0.183603692	1	1.470803707	-0.799544175	1	2.715001436	0.03367911	0.724684135
ENSBTAG00000009618	NEK2	0.01233606	-3.137843725	1.45E-13	0.255651437	1.764578006	1.74E-13	0.023582514	-2.215531079	6.15E-09	0.237295552	1.545614376	3.37E-09	0.032856398	-1.678222737	0.001590166	0.066601126	-0.642858758	0.687198033	0.133713832	0.479709999	0.693459706	0.009645652	-3.337419765	5.46E-07	0.126417869	0.375630248	0.450605251	0.07647172	-0.370753364	1	0.075538244	-0.415533646	1	0.010799137	-3.125426958	5.73E-05	0.059863098	-0.448731037	1	0.118962065	0.354895181	1	0.271500144	1.663126773	0.724684135
ENSBTAG00000021582	NCAPG	0.295624864	-2.510857033	1.52E-13	3.062169568	1.268241995	8.46E-08	0.287201331	-2.561058577	9.50E-15	3.172379778	1.297199092	2.01E-07	0.851279413	-0.897001595	0.13754259	1.808220574	0.283609312	1	2.090158321	0.457520731	0.649506962	0.333213444	-2.257899425	1.67E-05	1.903040425	0.360721441	0.449803407	0.992220573	-0.630233291	1	1.834910002	0.287612679	1	0.208783324	-2.914155277	3.60E-06	0.793186044	-0.936051952	1	1.211250112	-0.332520435	1	1.561125826	0.00438413	0.724684135
ENSBTAG00000008121	RSPO3	0.009692618	-3.403288649	1.79E-13	0.006024187	-4.104407091	4.52E-19	0.008422326	-3.610325041	2.81E-15	0.017164235	-2.598035644	1.85E-09	0.019713839	-2.341096396	2.07E-05	0.00808728	-3.635891584	1.75E-12	0.126676262	0.478347567	0.682472379	0.052612649	-0.878883165	0.426353598	0.821151785	5.28380267	6.98E-117	0.181620336	0.976248257	0.951640972	0.021035967	-2.184496555	0.010035617	0.004799617	-4.056363028	5.29E-06	0.104760421	0.304575015	1	0.054073666	-0.576762029	1	0.271500144	1.735974328	0.724684135
ENSBTAG00000012861	KIF4A	0.094723317	-2.538007948	3.12E-13	1.214626709	1.669958809	7.31E-14	0.096435637	-2.519410592	7.61E-14	1.180899384	1.552304498	1.06E-10	0.198333169	-1.405747441	0.003065301	0.408169759	-0.317558478	1	0.506705047	0.03530809	0.913784997	0.064012056	-3.018992986	3.10E-08	0.577910259	0.239621825	0.705670286	0.313534054	-0.676188024	1	0.433149677	-0.210006393	1	0.039596837	-3.670562269	3.72E-08	0.239452391	-0.992676813	1	0.281183062	-0.788434827	1	0.33937518	-0.38499539	0.724684135
ENSBTAG00000005077	CXCL12	0.025112693	-2.914366642	4.45E-13	0.021837678	-3.149468065	1.28E-16	0.016423537	-3.532626567	9.43E-18	0.026604565	-2.836092959	1.45E-12	0.026285119	-2.796858152	1.93E-08	0.028067617	-2.739520556	3.84E-10	0.513742617	1.60475062	0.196806195	0.061381424	-1.530385307	0.021008063	1.439131994	5.077087898	1.47E-123	0.353681707	1.083470816	0.951640972	0.023904508	-2.867342825	5.88E-05	0.035997125	-2.267225964	0.001940055	0.149657744	-0.090345768	1	0.216294663	0.382242558	1	0.203625108	0.559001031	0.724684135
ENSBTAG00000016931	E2F7	0.01233606	-2.953593088	6.95E-13	0.094127922	0.107012956	1	0.013475722	-2.837884375	5.53E-13	0.134739247	0.717355255	0.052225349	0.075271022	-0.245613008	1	0.201706268	1.438246818	3.90E-07	0.126676262	0.588161794	0.654964971	0.00701502	-3.572542248	8.43E-08	0.11005127	0.355480694	0.478629973	0.135737304	0.654543334	0.954409037	0.18836752	1.191576187	0.014286122	0.007199425	-3.460286377	9.29E-06	0.13469197	0.73734335	1	0.086517865	0.119772697	1	0	-0.480444193	1
ENSBTAG00000008181	CHAF1A	0.061239726	-2.544613608	8.19E-13	0.348273312	0.12218004	1	0.04000605	-3.173606647	1.55E-18	0.36044894	0.17703467	1	0.369783829	0.21128968	1	0.712156327	1.3679466	7.84E-07	0.443366916	0.468518173	0.667007601	0.074534586	-2.174094599	7.74E-05	0.501156553	0.712700584	0.029027823	0.311622261	-0.052287277	1	0.75538244	1.337191476	0.001130091	0.039596837	-3.048627379	4.34E-06	0.239452391	-0.372138045	1	0.108147331	-1.466282991	1	0.475125251	0.650148919	0.724684135
ENSBTAG00000020710	CENPQ	0.059477432	-2.537540678	8.19E-13	0.364086803	0.255753174	0.865105814	0.04927061	-2.820994217	7.92E-16	0.454852234	0.632140569	0.103707402	0.378147276	0.301564545	1	0.59845869	1.106730673	0.000271729	0.267427664	-0.202924994	1	0.085933993	-1.91837727	0.000543002	0.44020508	0.552574917	0.127421785	0.342210949	0.136082983	1	0.568927281	0.931509697	0.095920557	0.065994729	-2.274368873	0.000460943	0.284349714	-0.08807601	1	0.302812528	-0.014546172	1	0.203625108	-0.302022556	0.725866511
ENSBTAG00000012925	NCAPH	0.049784813	-2.582938458	1.10E-12	0.516574037	1.161352074	5.03E-06	0.055587354	-2.429288438	2.64E-12	0.541102516	1.214981379	5.30E-06	0.151736822	-0.891138482	0.236708195	0.305413735	0.197731366	1	0.591155889	1.145770011	0.322879806	0.046474507	-2.591605846	3.98E-06	0.371352491	0.512548673	0.180721019	0.388093981	0.540877004	0.954409037	0.305021517	0.185049224	1	0.031197508	-3.122674098	4.49E-06	0.254418165	-0.029685387	1	0.20547993	-0.341828869	1	0.203625108	-0.091676756	0.724684135
ENSBTAG00000010758	SMIM5	0.024231546	-2.889792348	1.18E-12	0.030120935	-2.605691857	1.46E-12	0.191607926	0.263307204	0.643274797	0.011156753	-3.999106833	1.83E-19	0.009558225	-4.138492873	7.00E-14	0.02854334	-2.639011889	1.98E-09	0.147788972	-0.093152901	0.995361091	0.016660672	-3.305670451	3.02E-07	0.011851675	-3.854352751	6.66E-15	0.122354753	-0.412231199	1	0.010517983	-3.913956218	2.07E-07	2.699784365	5.818941461	6.41E-121	0.164623519	0.110669855	1	0.270368328	0.767950235	1	0.33937518	1.219746118	0.724684135
ENSBTAG00000014730	NCAPD2	0.103094215	-2.48510574	1.41E-12	1.149113675	1.448363209	4.69E-10	0.120860384	-2.257993438	1.62E-11	1.140563432	1.385832362	2.98E-08	0.239553014	-1.196125124	0.023158785	0.540896288	0.056434063	1	1.477889722	1.516395651	0.194536897	0.113994073	-2.257165043	3.30E-05	0.544612696	0.06637926	1	0.464565702	-0.171242623	1	0.47235307	-0.152413423	1	0.10079195	-2.411395926	0.000185498	0.329247037	-0.625783189	1	0.270368328	-0.913177458	1	0.475125251	-0.039665426	0.724684135
ENSBTAG00000007237	BUB1B	0.196055238	-2.408653698	1.94E-12	2.420593649	1.78506881	3.96E-16	0.238772954	-2.123893742	7.99E-11	2.197880322	1.518940849	2.28E-10	0.353056936	-1.498572176	0.001018008	0.686943044	-0.502795798	0.834853322	1.597528413	0.765941828	0.484459069	0.110486563	-3.160552909	5.25E-09	0.961678791	0.033072208	1	0.667215761	-0.507934744	1	0.678888015	-0.495026909	1	0.12119032	-3.002292849	2.48E-06	0.568699428	-0.713924449	1	0.735401854	-0.353089626	1	0.746625395	-0.304681457	0.724684135
ENSBTAG00000011044	TACC3	0.223370799	-2.404078625	2.09E-12	2.533923668	1.606103442	6.69E-13	0.37774134	-1.627760198	4.91E-07	2.117637523	1.197126395	3.81E-06	0.409211507	-1.468274084	0.001430486	1.035647511	-0.052185688	1	2.512412527	1.240673174	0.277165315	0.141177275	-2.991441239	2.41E-08	1.188553717	0.168615169	0.83475534	1.053397949	-0.022732633	1	0.849088109	-0.349979916	1	0.297576232	-1.888519475	0.003186645	0.763254496	-0.481662706	1	0.58399559	-0.865237659	1	1.018125539	-0.072799313	0.724684135
ENSBTAG00000001631	KIFC1	0.1383401	-2.421168551	2.43E-12	1.450699538	1.41362661	1.09E-09	0.128440478	-2.53821759	4.41E-14	1.578680536	1.536053909	1.74E-10	0.283759804	-1.317361201	0.007080306	0.630807809	-0.099162563	1	1.477889722	1.149208313	0.310712355	0.117501583	-2.577859839	1.62E-06	0.776566911	0.234749017	0.714550293	0.569714317	-0.239920705	1	0.568927281	-0.249504894	1	0.12958965	-2.412912422	0.000148869	0.538767879	-0.299342272	1	0.55155139	-0.271363942	1	0.814500431	0.300786016	0.724684135
ENSBTAG00000021211	DPT	0.010133192	-3.148898913	2.54E-12	0.010165816	-3.183041173	1.86E-14	0.007580094	-3.564702424	3.42E-15	0.016306023	-2.477887864	5.41E-09	0.020311228	-2.105014677	0.000115396	0.010941614	-3.023856291	6.23E-10	0.337803365	2.064454882	0.104173224	0.032444467	-1.386632739	0.070457462	0.706021225	5.147556762	6.16E-114	0.084118892	0.035699941	1	0.021992147	-1.930106819	0.025624373	0.008399329	-3.185532487	0.000117688	0.104760421	0.494947058	1	0.129776798	0.735228389	1	0.135750072	1.187232015	0.724684135
ENSBTAG00000000064	FEN1	0.103534788	-2.430203156	2.74E-12	0.666802201	0.475713792	0.302684095	0.137283921	-2.019841392	8.82E-10	0.600748233	0.287178308	0.858693732	0.497625089	-0.024607161	1	1.028987398	1.22312495	1.95E-05	0.738944861	0.555722557	0.605860181	0.130654745	-2.010781197	0.00021962	0.735932596	0.610575512	0.093837923	0.447359565	-0.178177116	1	0.928451075	0.948477242	0.107875181	0.065994729	-2.969937762	4.67E-06	0.359178586	-0.457621243	1	0.486662991	-0.039465486	1	0.814500431	0.709018603	0.724684135
ENSBTAG00000018216	SKA1	0.106618803	-2.403007795	3.93E-12	0.991355277	1.19375007	1.10E-06	0.112859174	-2.326587421	2.87E-12	0.974928562	1.126491822	2.46E-05	0.335732653	-0.651915098	0.66110275	0.620341917	0.318255035	1	0.316690655	-0.673418674	1	0.097333401	-2.453846897	4.88E-06	0.712229246	0.53812502	0.164847565	0.453094944	-0.175456641	1	0.623429558	0.305619904	1	0.051595879	-3.335386622	3.70E-07	0.478904782	-0.071581381	1	0.638069255	0.330227984	1	0.678750359	0.452045878	0.724684135
ENSBTAG00000013009	AURKA	0.233063417	-2.354205099	4.72E-12	2.410051322	1.481126211	7.37E-11	0.215611556	-2.476650749	7.41E-14	2.449765475	1.464112648	1.44E-09	0.419367121	-1.44471368	0.001741394	1.021375841	-0.088602636	1	1.175274207	0.122878312	0.849959369	0.265693878	-2.085932325	8.89E-05	1.348833516	0.359439672	0.455518324	1.08589843	0.009351232	1	0.78884875	-0.473765112	1	0.14998802	-2.89266998	4.89E-06	1.017672661	-0.08496819	1	0.811104985	-0.409779816	1	1.289625682	0.236844443	0.724684135
ENSBTAG00000016131	NCAPG2	0.103094215	-2.391402267	6.16E-12	0.907016659	1.100491543	1.43E-05	0.119597035	-2.17934381	5.50E-11	0.926010491	1.107441627	4.04E-05	0.333343097	-0.599507931	0.811142598	0.666962706	0.509487914	0.579468997	0.999334955	1.037926231	0.357993063	0.100840911	-2.342276537	1.41E-05	0.57283097	0.249426107	0.688332658	0.508536941	0.056161804	1	0.585182346	0.271789365	1	0.092392621	-2.444243113	0.000138211	0.493870556	0.031459625	1	0.291997795	-0.71428621	1	0.407250215	-0.140970193	0.724684135
ENSBTAG00000002418	TICRR	0.005286883	-3.263659134	6.56E-12	0.081703037	0.906668765	0.004456334	0.002947814	-4.046088521	8.77E-16	0.094403294	1.149385442	0.000156962	0.035843344	-0.466795004	1	0.078018462	0.787174289	0.09598947	0.084450841	0.896819297	0.51485747	0.01052253	-2.177263957	0.001780556	0.053614721	0.15623817	0.865543256	0.042059446	-0.166498243	1	0.100398932	1.136008346	0.045894217	0.003599712	-3.415174648	8.76E-05	0.044897323	0.265304898	1	0.010814733	-1.20249906	1	0	0.372521326	1
ENSBTAG00000014082	CHST9	0.017622943	-2.771246581	6.89E-12	0.025602795	-2.260807855	3.21E-10	0.021055816	-2.523563729	4.10E-11	0.039477741	-1.596142166	4.34E-05	0.051375459	-1.163952983	0.063856926	0.035203452	-1.751009099	6.43E-05	0.274465234	1.352910144	0.276701488	0.057873914	-0.958052011	0.26596357	0.785596759	4.245982781	1.51E-84	0.183532129	0.769045291	0.951640972	0.073625883	-0.598545611	1	0.013198946	-3.000997791	6.49E-05	0.074828872	-0.324642198	1	0.097332598	-0.049636657	1	0.067875036	0.199510344	0.758438799
ENSBTAG00000009819	CDC20	0.257735537	-2.316320132	9.41E-12	2.850193487	1.680066695	2.70E-14	0.29983482	-2.098979646	1.09E-10	2.498254439	1.354810258	4.24E-08	0.530481487	-1.205178484	0.017319328	0.922901319	-0.369773711	1	1.470852151	0.338695634	0.717171019	0.127147235	-3.264012967	1.70E-09	1.495004177	0.405206868	0.363092722	0.598391213	-0.976243469	0.954409037	1.006857859	-0.218954067	1	0.112790991	-3.410780094	1.14E-07	0.478904782	-1.259814003	1	1.113917513	-0.063835347	1	1.49325079	0.330559165	0.724684135
ENSBTAG00000008772	SMC2	0.553360401	-2.232475274	1.08E-11	3.812557364	0.845424597	0.002281508	0.490179397	-2.419356529	4.38E-14	4.006990717	0.913159448	0.001574082	2.173301407	-0.128473249	1	3.926612106	0.860117463	0.012518159	3.096530845	0.390131098	0.686745058	0.555063448	-2.153968514	3.99E-05	2.712340534	0.224416862	0.729121743	1.695760401	-0.487675094	1	3.65643348	0.679325041	0.539139237	0.255579587	-3.257927445	2.41E-07	1.69113251	-0.489251296	1	1.600580505	-0.566552407	1	2.511376328	0.035196747	0.724684135
ENSBTAG00000000988	BRCA2	0.20134212	-2.33121554	1.29E-11	1.046702496	0.222467701	0.926022637	0.147390712	-2.79832062	2.55E-16	1.164593361	0.398301327	0.561597425	1.307087268	0.569806939	0.507014215	1.672163988	1.02006807	0.00111503	3.687686734	2.031923158	0.071271248	0.390210481	-1.284141069	0.036412507	1.069472599	0.24495312	0.695410816	0.871777613	-0.076148008	1	1.881762837	1.125745533	0.019588026	0.095992333	-3.299238211	3.90E-07	0.733322947	-0.317320953	1	0.497477724	-0.871544655	1	0.610875323	-0.530698655	0.724684135
ENSBTAG00000049308	GAS2L3	0.01850409	-2.649213089	1.35E-11	0.273723998	1.780064963	9.98E-15	0.02863591	-2.022186142	2.05E-08	0.241157505	1.454692302	1.17E-08	0.034051177	-1.717159033	0.000544505	0.099425967	-0.10986852	1	0.112601122	0.153754902	0.890361079	0.023675692	-2.192550714	0.000272056	0.08126863	-0.420458759	0.544403671	0.116619374	0.150850885	1	0.084143867	-0.347246381	1	0.020398371	-2.360607657	0.000945554	0.164623519	0.730624152	1	0.043258933	-1.002101706	1	0	-0.750303898	1
ENSBTAG00000018806	PSRC1	0.042295062	-2.443341032	1.76E-11	0.545188926	1.812272673	1.12E-15	0.02400363	-3.273829918	2.61E-18	0.594740751	1.93139385	1.80E-16	0.062725852	-1.82256381	7.94E-05	0.140338087	-0.633119252	0.574801	0.147788972	-0.450852507	1	0.054366404	-1.992114409	0.000466805	0.11625929	-0.909169068	0.038500247	0.202650059	-0.039773384	1	0.137689964	-0.626667811	1	0.029997604	-2.805930254	3.43E-05	0.179589293	-0.130170742	1	0.270368328	0.409841247	1	0.203625108	0.277988657	0.724684135
ENSBTAG00000019278	KNTC1	0.050225387	-2.456409659	1.94E-11	0.368604944	0.670687411	0.052720443	0.055166238	-2.32642113	3.21E-11	0.417949128	0.878358245	0.005581634	0.218047008	-0.216905975	1	0.414829871	0.849036807	0.019084135	0.809320562	1.716869275	0.147709907	0.041213242	-2.651132554	3.59E-06	0.296856247	0.272554193	0.607054861	0.309710468	0.320068393	1	0.406376629	0.751226117	0.375085361	0.035997125	-2.810533352	3.88E-05	0.299315488	0.305030053	1	0.097332598	-1.23340093	1	0.33937518	0.604989015	0.724684135
ENSBTAG00000012182	DIRAS3	0.007049177	-3.32148472	2.43E-11	0.008283257	-3.138682057	2.55E-12	0.005895628	-3.578541332	3.41E-13	0.015876918	-2.179936019	2.03E-06	0.029869453	-1.207465015	0.147239115	0.012368781	-2.517475814	1.21E-06	0.077413271	0.330757002	0.787686893	0.016660672	-1.997171487	0.008824	0.551949447	5.024210865	7.95E-95	0.086030686	0.406648508	1	0.035378671	-0.917882983	0.901350773	0.004799617	-3.537810004	0.000145486	0.044897323	-0.180396775	1	0.075703132	0.359453463	1	0.067875036	0.929187284	0.724684135
ENSBTAG00000017133	GINS4	0.043616783	-2.403465262	3.76E-11	0.227789572	0.135744441	1	0.037479353	-2.633343309	1.30E-13	0.25317247	0.310185207	0.766704673	0.245526904	0.248681599	1	0.369160528	0.95401905	0.003658076	0.246314954	0.259640876	0.793874512	0.078918974	-1.456451144	0.017077018	0.384332897	0.998291974	0.000722147	0.231326954	0.14986827	1	0.423587874	1.098855281	0.02349231	0.038396933	-2.464519328	0.000241845	0.194555067	-0.027960179	1	0.20547993	0.024074416	1	0.067875036	-0.727786462	0.875867831
ENSBTAG00000055045	HSPB7	0.09384217	-2.359317223	4.35E-11	0.105423273	-2.214598552	1.32E-11	0.06864196	-2.826287613	1.66E-15	0.185802846	-1.342812343	0.000258821	0.215060062	-1.089103002	0.063856926	0.135580864	-1.803003319	5.34E-06	0.492629907	0.184221533	0.816790898	0.186774904	-1.272922046	0.048326274	3.064504599	4.192952981	2.76E-90	0.716922379	0.741224038	0.951640972	0.320320402	-0.467804393	1	0.080393579	-2.476126949	0.000188996	0.478904782	0.155179988	1	0.627254522	0.533252721	1	0.475125251	0.218299517	0.724684135
ENSBTAG00000046286	CCNB3	0.033483591	-2.463859185	5.51E-11	0.446166352	1.850360106	8.97E-16	0.026109212	-2.833977108	2.69E-14	0.420523763	1.654604937	3.38E-11	0.053765016	-1.726965086	0.000343377	0.104658912	-0.749907293	0.322756747	0.281502804	0.770922718	0.509746507	0.02455257	-2.808177397	2.16E-06	0.155764875	-0.122582714	1	0.214120817	0.364490967	0.994129097	0.09466185	-0.857380857	0.743811749	0.025197987	-2.733350608	9.34E-05	0.179589293	0.184075012	1	0.097332598	-0.660496127	1	0.135750072	0.175955616	0.724684135
ENSBTAG00000009125	ALDH1A3	0.004846309	-3.320047056	7.02E-11	0.009036281	-2.500014386	9.10E-09	0.012212373	-2.04266058	2.80E-06	0.005578376	-3.137651559	2.43E-10	0.007766058	-2.604957578	2.00E-05	0.012844503	-1.946290734	0.000199741	0.077413271	0.840431375	0.556003306	0.008768775	-2.360812005	0.001837492	0.379817973	4.879507551	1.93E-90	0.074559927	0.721606516	0.954409037	0.027729229	-0.749681405	1	0.011999042	-1.88426856	0.034679564	0.044897323	0.32542589	1	0.032444199	-0.139282154	1	0	0.432445143	1
ENSBTAG00000022520	BRCA1	0.098247906	-2.261953672	7.18E-11	0.587734747	0.546116803	0.167567673	0.08127545	-2.549027656	6.32E-14	0.695151527	0.82951854	0.008282169	0.417574954	-0.039404842	1	0.691224545	0.804571831	0.03340153	0.830433272	0.967019948	0.390608773	0.107855931	-2.046787171	0.000177	0.54912762	0.401008997	0.38151846	0.430153428	0.009539816	1	0.853869011	1.080898717	0.023130572	0.039596837	-3.453048973	2.15E-07	0.344212812	-0.276844519	1	0.183850463	-1.157653867	1	0.135750072	-1.168706595	0.840977033
ENSBTAG00000005862	SMC4	0.842376661	-2.133276778	7.48E-11	7.075784174	1.361618422	3.54E-09	1.041841777	-1.822730134	5.48E-09	6.037948851	1.01745239	0.000196169	1.997669023	-0.80394875	0.248153314	3.837176309	0.218837057	1	5.813032905	0.792262734	0.465320058	0.757622147	-2.216138114	2.17E-05	4.165581665	0.347456715	0.475115611	2.406947401	-0.492505389	1	3.738664986	0.164492208	1	0.715142881	-2.280685705	0.000238316	2.140105742	-0.662157308	1	2.152131895	-0.651666199	1	3.325876759	-0.078494177	0.724684135
ENSBTAG00000015101	HMGB2	1.773749183	-2.123369486	8.64E-11	17.10454953	1.66770392	2.70E-14	3.005086064	-1.336893943	2.08E-05	13.03966951	1.077315471	5.08E-05	3.311924959	-1.155452654	0.016222043	8.156735059	0.245871775	1	5.693394213	-0.311984634	1	1.319700614	-2.483758249	6.18E-07	5.669051325	-0.336622609	0.592227757	5.920822956	-0.253739037	1	5.994294322	-0.240624273	1	1.491480874	-2.285808791	7.96E-05	4.459800778	-0.672362502	1	5.839955896	-0.278965891	1	8.212879344	0.144316571	0.724684135
ENSBTAG00000011455	POLA2	0.074897507	-2.274816163	9.89E-11	0.388183551	0.277439297	0.827193364	0.071168658	-2.357700885	4.03E-12	0.395635622	0.303701883	0.821752528	0.348875212	0.090263251	1	0.700738991	1.303866339	4.06E-06	0.471517197	0.531158835	0.625373759	0.081549606	-2.069749365	0.000180396	0.483096858	0.621546642	0.07267015	0.265739229	-0.312379964	1	0.66167677	1.091653265	0.022233791	0.052795783	-2.667320737	4.68E-05	0.194555067	-0.678492287	1	0.227109396	-0.489281112	1	0.407250215	0.431755244	0.724684135
ENSBTAG00000015702	PITX3	0.078862669	1.912852811	1.23E-10	0.047440473	0.947662518	0.012881967	0.027372561	-0.012547613	1	0.008582118	-1.766419431	0.000803789	0.014337337	-0.970871369	0.514212414	0.025213283	-0.139427633	1	0.02815028	0.322536495	0.972434184	0.002630632	-3.076204647	0.000616367	0.009594213	-1.554700951	0.007060007	0.015294344	-0.720668185	1	0.00095618	-3.949251868	0.000444866	0.031197508	0.219356637	0.957400591	0.044897323	1.080818343	1	0.021629466	0.198348162	1	0	1.18451763	1
ENSBTAG00000006882	IQGAP3	0.074016359	-2.301905204	1.24E-10	0.667555225	1.265770324	2.86E-07	0.062746332	-2.552600378	2.72E-13	0.792558562	1.565340221	1.91E-10	0.13978904	-1.321278569	0.00986868	0.338238576	0.031257944	1	1.182311777	1.858573228	0.110701805	0.063135179	-2.44889665	1.17E-05	0.349906602	0.084999804	0.945184003	0.424418048	0.369136188	0.986677003	0.254343961	-0.400137376	1	0.052795783	-2.676773507	6.05E-05	0.299315488	-0.101334361	1	0.237924129	-0.434339946	1	0.33937518	0.199738709	0.724684135
ENSBTAG00000016958	PHF19	0.014979501	-2.590746124	1.47E-10	0.205198871	1.686403753	1.00E-12	0.026530328	-1.767091821	1.54E-06	0.146754211	0.976770151	0.001408806	0.042414623	-1.025973479	0.151090715	0.09181441	0.160330908	1	0.098525981	0.328926171	0.823233733	0.016660672	-2.325538142	0.00019183	0.070545686	-0.256586795	0.826652953	0.066912755	-0.290871528	1	0.075538244	-0.136998147	1	0.079193675	-0.061041627	1	0.029931549	-0.920998653	1	0.010814733	-1.971576839	1	0.067875036	0.604989015	0.734951768
ENSBTAG00000021681	PRR11	0.002202868	-3.918530697	1.65E-10	0.093374899	1.846223421	2.59E-10	0.003368931	-3.401280943	9.20E-10	0.089254023	1.681343539	1.25E-07	0.002986945	-3.429097657	3.95E-06	0.023310394	-0.636595946	1	0.042225421	0.466495041	0.760176118	0	-5.427824427	1.36E-06	0.055872183	0.757733858	0.105158547	0.01911793	-0.774949096	1	0.026773048	-0.376324724	1	0.003599712	-2.944854713	0.004820467	0.044897323	0.735624833	1	0.010814733	-0.73337057	1	0.067875036	1.843195284	0.724684135
ENSBTAG00000021786	AUNIP	0.006608604	-2.938843152	1.73E-10	0.033886052	-0.566596278	0.441399085	0.00463228	-3.434423227	2.26E-13	0.055354659	0.234274339	0.978167559	0.088413581	0.998801044	0.021658375	0.116551971	1.55120178	1.47E-07	0.042225421	0.014729509	1	0.01052253	-2.156777501	0.001939331	0.063208935	0.44398574	0.369535656	0.021029723	-1.101930419	0.954409037	0.129084341	1.572393522	0.000264276	0.001199904	-4.398027341	6.38E-06	0	-1.719115091	1	0.054073666	0.408992923	1	0	0.392742719	1
ENSBTAG00000017140	CIP2A	0.097366758	-2.204276086	2.22E-10	0.72440849	1.020242425	9.73E-05	0.135178339	-1.722738752	1.66E-07	0.659106633	0.819834282	0.00984069	0.259864242	-0.699619434	0.543023629	0.609400304	0.668633447	0.156127239	0.563005608	0.474959439	0.655910768	0.105225298	-2.012592612	0.000237539	0.545741427	0.469438689	0.266965404	0.27912178	-0.554965181	1	0.565102559	0.501997107	0.897344209	0.123590129	-1.757672611	0.007596703	0.26938394	-0.545599292	1	0.291997795	-0.449205296	1	0.33937518	-0.09912198	0.724684135
ENSBTAG00000021916	MYL4	0.039211048	-2.732147272	2.66E-10	0.055347218	-2.255683367	7.34E-09	0.265724398	0.194509517	0.799418387	0.024888141	-3.394710494	3.22E-14	0.016129505	-3.947326763	6.68E-12	0.057562402	-2.157728035	5.49E-06	0.337803365	0.537855118	0.622702392	0.018414427	-3.700219679	1.71E-07	0.074496244	-1.755322528	0.000219055	0.068824548	-1.773453148	0.951640972	0.019123606	-3.635258664	5.24E-06	3.689705299	5.552503066	5.93E-93	0.044897323	-2.008408086	1	0.854363918	1.87337457	1	1.15387561	2.277868106	0.724684135
ENSBTAG00000006015	POLH	0.068288903	-2.236810176	2.71E-10	0.569662186	1.196941393	1.67E-06	0.072010891	-2.16587741	1.76E-10	0.583583998	1.206978872	5.56E-06	0.138594262	-1.147988665	0.037943045	0.304938013	0.06453317	1	0.520780188	0.845722798	0.458236351	0.059627669	-2.350224543	2.16E-05	0.419887923	0.583809907	0.102200679	0.3555935	0.291247774	1	0.305021517	0.062752472	1	0.081593483	-1.873681098	0.004889186	0.404075909	0.494947058	1	0.248738862	-0.193191318	1	0.203625108	-0.206766344	0.724684135
ENSBTAG00000010731	CDKN2D	0.045379077	-2.279609276	2.76E-10	0.356933081	1.020722576	0.000158757	0.037479353	-2.567789229	4.12E-13	0.562128704	1.897362556	8.56E-16	0.06989452	-1.602546319	0.000739334	0.176968707	-0.203957791	1	0.140751402	-0.459012461	1	0.088564626	-1.222002038	0.06349078	0.221795637	0.158081089	0.818006964	0.248533091	0.322163637	1	0.173068635	-0.222965131	1	0.049196071	-2.048582608	0.002283181	0.179589293	-0.070974949	1	0.140591531	-0.428390072	1	0.067875036	-0.663705245	0.869784367
ENSBTAG00000001717	AURKB	0.220286784	-2.130159046	3.30E-10	1.882181934	1.398175188	1.38E-09	0.282147935	-1.767620798	4.17E-08	1.90222637	1.373631861	2.47E-08	0.377549887	-1.291524737	0.007919216	0.911959705	0.063692681	1	0.738944861	-0.245190251	1	0.183267394	-2.323876504	1.11E-05	1.001184375	0.212252686	0.753238172	0.642362452	-0.458450531	1	0.785980209	-0.166313287	1	0.211183133	-2.096857806	0.000901101	0.598630977	-0.538260093	1	0.702957654	-0.313958968	1	1.15387561	0.383979894	0.724684135
ENSBTAG00000018142	DTL	0.04317621	-2.313858941	3.38E-10	0.163782585	-0.29487761	0.894023167	0.035794887	-2.596288252	6.04E-13	0.161343811	-0.313272962	0.935597944	0.310642312	0.749391424	0.140512038	0.448606157	1.446160353	2.63E-07	0.351878505	0.87076218	0.454033505	0.062258301	-1.697571809	0.004536881	0.282747109	0.597134741	0.102007169	0.168237785	-0.213139853	1	0.493389037	1.465836432	0.000264276	0.0287977	-2.765495653	6.38E-05	0.164623519	-0.148957584	1	0.129776798	-0.497800746	1	0.135750072	-0.040584079	0.725203879
ENSBTAG00000006404	CENPT	0.104856509	-2.170259011	3.93E-10	0.86032921	1.257157958	2.10E-07	0.119175919	-1.98737018	1.86E-09	0.824741503	1.138459252	2.09E-05	0.246721683	-0.856069111	0.259579388	0.519964506	0.313597319	1	0.563005608	0.400790153	0.690794422	0.078918974	-2.503566699	3.98E-06	0.513572594	0.28697343	0.612991123	0.531478457	0.318583896	1	0.446536202	0.060230461	1	0.076793866	-2.517078102	9.52E-05	0.344212812	-0.281271869	1	0.291997795	-0.522880029	1	0.543000287	0.412898539	0.724684135
ENSBTAG00000017659	BFSP2	0.067848329	-2.294678727	3.94E-10	0.162276538	-1.003152583	0.007704888	0.633358946	1.307216528	3.13E-07	0.019738871	-4.086955959	2.84E-23	0.020311228	-3.982589164	1.26E-15	0.135580864	-1.251837858	0.005010353	0.232239813	-0.353615442	1	0.02104506	-3.873566823	3.39E-10	0.038941219	-3.063913599	8.58E-13	0.242797712	-0.319416819	1	0.019123606	-3.993712635	7.11E-09	3.552916225	4.523977726	3.55E-68	0.374144361	0.340290796	1	0.465033525	0.639101941	1	0.882375467	1.556053491	0.724684135
ENSBTAG00000040098	ENSBTAG00000040098	0.219405637	-2.127890525	3.94E-10	1.076823431	0.36010321	0.601177442	0.236246256	-2.024892999	5.04E-10	1.57095663	1.019794791	0.000227421	0.52868932	-0.775101804	0.381733871	1.771114232	1.219247089	1.79E-05	0.647456449	-0.427065925	1	0.166606722	-2.454291145	3.86E-06	1.016422243	0.245584002	0.691688448	0.583096868	-0.592278174	1	1.698176219	1.042507749	0.044868495	0.179985624	-2.320283279	0.000239775	0.568699428	-0.602593199	1	0.605625056	-0.518245017	1	0.475125251	-0.778834804	0.731812052
ENSBTAG00000011636	DDIAS	0.027756135	-2.376395446	4.07E-10	0.200304219	0.727382179	0.025537669	0.016844653	-3.106489141	1.30E-15	0.270765811	1.263929934	2.20E-06	0.105737864	-0.342602256	1	0.174590095	0.463007722	0.774067264	0.182976823	0.517380716	0.664831066	0.021921937	-2.61172937	1.27E-05	0.184547515	0.54463952	0.1610856	0.168237785	0.372416472	0.994129097	0.183586618	0.512758219	0.926294955	0.023998083	-2.446199973	0.000522487	0.239452391	0.927115755	1	0.097332598	-0.307159327	1	0.203625108	0.944031131	0.724684135
ENSBTAG00000012397	DCK	0.085911846	-2.169651052	4.28E-10	0.603171726	0.953177213	0.000408175	0.108648011	-1.827714459	2.96E-08	0.496475504	0.580410628	0.167965266	0.276591136	-0.376316699	1	0.665535539	1.086825167	0.00036396	0.218164673	-0.65976572	1	0.080672729	-2.181447365	6.35E-05	0.366837567	0.065928707	0.977156499	0.334563777	-0.071047641	1	0.544066593	0.674581361	0.492368059	0.075593962	-2.250373648	0.000492226	0.344212812	0.006408738	1	0.291997795	-0.235043254	1	0.135750072	-0.886259051	0.808288256
ENSBTAG00000008997	ENG	0.040532768	-2.373978627	4.28E-10	0.038404192	-2.482789033	1.77E-12	0.042111632	-2.325867376	1.79E-10	0.092257764	-1.150783488	0.005211815	0.086024025	-1.222566815	0.037420318	0.041863565	-2.31398148	2.86E-08	0.372991215	0.986509635	0.402368031	0.120132215	-0.699865252	0.533780752	1.220158185	3.821524005	1.16E-67	0.621332729	1.791551819	0.129376324	0.116653997	-0.73962178	0.958999655	0.059995208	-1.694694414	0.020664241	0.688425623	1.866347426	1	0.129776798	-0.466048806	1	0.203625108	0.40651463	0.724684135
ENSBTAG00000013674	EDNRA	0.045379077	-2.342073363	4.28E-10	0.03350954	-2.816047907	2.47E-15	0.026109212	-3.15453099	1.81E-16	0.137742988	-0.671741027	0.246932181	0.177424551	-0.260183907	1	0.044242177	-2.366581775	9.08E-09	0.950071964	2.217332912	0.053123263	0.329705934	0.707167517	0.201941586	1.237653515	3.566166857	2.32E-58	0.210297231	0.01280429	1	0.168287733	-0.32881281	1	0.026397892	-2.985714479	2.73E-05	0.119726195	-0.663944151	1	0.108147331	-0.838422061	1	0.067875036	-0.724540802	0.854802748
ENSBTAG00000021181	BUB1	0.145829851	-2.141849359	4.36E-10	1.390457668	1.610708818	7.81E-13	0.154128573	-2.066765296	3.37E-10	1.223380867	1.300125792	2.73E-07	0.295110197	-1.054271906	0.064471262	0.538517677	-0.134952043	1	0.893771403	0.616642347	0.566462798	0.093825891	-2.705168405	5.51E-07	0.606128534	0.055145034	1	0.546772801	-0.099663812	1	0.531636249	-0.146246267	1	0.080393579	-2.901265444	6.74E-06	0.434007458	-0.406295771	1	0.270368328	-1.077973461	1	0.814500431	0.496907683	0.724684135
ENSBTAG00000026375	RMI2	0.053749975	-2.224850063	4.36E-10	0.241720504	0.089576717	1	0.03200484	-2.990310813	1.65E-16	0.344142917	0.690428336	0.048974152	0.329161373	0.584258113	0.431874595	0.354888858	0.731960313	0.072364503	0.112601122	-0.95499748	1	0.11487095	-1.033514029	0.151613128	0.349342237	0.687636965	0.040562587	0.284857159	0.328963134	1	0.428368776	0.977249878	0.072437012	0.023998083	-3.246356092	2.19E-06	0.284349714	0.363402357	1	0.248738862	0.16305625	1	0.203625108	0.148034127	0.724684135
ENSBTAG00000001034	IL18R1	0.001762294	-3.917669129	4.37E-10	0.003765117	-3.024779089	6.56E-09	0.002105582	-3.726234009	2.23E-10	0.009440329	-1.711990495	0.00164778	0.019713839	-0.585703943	1	0.004281501	-2.779640865	8.46E-06	0.112601122	2.03970822	0.172289625	0.01753755	-0.718912353	0.68397873	0.219538175	4.456504756	1.66E-62	0.022941516	-0.260018275	1	0.033466311	0.231582032	1	0.002399808	-3.096857806	0.003853953	0.029931549	0.583621739	1	0.021629466	0.118913695	1	0	1.105373745	1
ENSBTAG00000004877	TRAIP	0.005727456	-2.980546332	5.24E-10	0.068901639	0.81248535	0.02235669	0.006737861	-2.769311694	8.33E-10	0.069086047	0.797408857	0.043652507	0.037038122	-0.231845716	1	0.066125404	0.708397176	0.233321788	0.063338131	0.687450515	0.687951997	0.00350751	-3.395402949	1.16E-05	0.076189341	0.932473659	0.009213172	0.036324067	-0.197020187	1	0.073625883	0.83412955	0.392427535	0.003599712	-3.242535261	0.000321831	0.044897323	0.437944284	1	0.043258933	0.296911997	1	0	0.544571774	1
ENSBTAG00000002719	ORC1	0.033483591	-2.307608578	5.42E-10	0.147969094	-0.040192193	1	0.030320375	-2.460806197	9.59E-12	0.137313882	-0.160421261	1	0.199527947	0.441737968	0.881065161	0.333481353	1.368178777	1.10E-06	0.239277383	0.694000216	0.56713323	0.048228262	-1.69136763	0.004993674	0.248320815	0.809282747	0.012732052	0.116619374	-0.369560212	1	0.355699073	1.347712596	0.001618208	0.013198946	-3.459427886	2.12E-06	0.044897323	-1.367912771	1	0.17303573	0.261350811	1	0.135750072	0.328408078	0.724684135
ENSBTAG00000008499	TROAP	0.090317581	-2.168966899	7.19E-10	0.901368984	1.666488308	2.00E-13	0.089697776	-2.186499418	1.09E-10	0.828603456	1.436624001	8.76E-09	0.148749876	-1.390940995	0.00479443	0.252132835	-0.607636127	0.628361763	0.985259814	1.430919253	0.221504588	0.062258301	-2.627133235	2.15E-06	0.356678988	-0.057144279	1	0.569714317	0.646587231	0.951640972	0.232351814	-0.697901854	0.960615829	0.089992812	-2.071759689	0.001683466	0.6435283	0.813616502	1	0.183850463	-0.945944527	1	0.271500144	-0.220041351	0.724684135
ENSBTAG00000044073	CD248	0.062120873	-2.44095557	8.28E-10	0.031626982	-3.455892438	1.03E-18	0.029057026	-3.553735097	7.52E-18	0.108563788	-1.616618576	5.31E-05	0.145762931	-1.138295563	0.098763098	0.043766454	-2.938863324	3.99E-11	3.026155144	3.396467676	0.000133061	0.28936957	-0.084920177	1	2.103390173	4.106329663	5.57E-74	0.51427232	0.777220219	0.951640972	0.105179833	-1.585327929	0.085478018	0.041996646	-2.884449473	0.000126745	0.314281263	0.082058518	1	0.270368328	-0.140648519	1	0.271500144	0.052200553	0.724684135
ENSBTAG00000021162	CKAP2	0.730030402	-1.98320549	1.47E-09	5.993689579	1.523437499	1.12E-11	0.602617455	-2.275524849	9.29E-13	5.807948099	1.408982866	6.81E-09	1.362047061	-1.014862339	0.054804775	2.212108831	-0.277989324	1	5.200764306	0.986323301	0.371176818	0.661165623	-2.05836979	9.79E-05	2.62034896	-0.006148684	1	2.680333802	0.026591467	1	2.163836027	-0.296808935	1	0.451163965	-2.594755464	3.22E-05	2.454387005	-0.112516637	1	2.357611825	-0.167197789	1	2.239876185	-0.283300597	0.724684135
ENSBTAG00000021508	LMOD3	0.010573766	-3.008838123	1.49E-09	0.007530234	-3.524465444	1.33E-13	0.050533958	-0.711668923	0.214055722	0.003861953	-4.38851702	5.28E-15	0.005973891	-3.717358039	1.77E-08	0.00808728	-3.364506738	1.98E-09	0.154826542	1.029405665	0.449492759	0.004384387	-3.999666006	2.06E-06	0.002821827	-4.686782601	7.29E-13	0.034412274	-1.152274491	0.970881815	0.003824721	-4.131261777	1.83E-05	1.481881641	6.615637929	3.14E-121	0.044897323	-0.429521446	1	0.097332598	0.433454044	1	0.543000287	2.857055969	0.724684135
ENSBTAG00000006065	PCNA	0.929169654	-1.972938113	1.54E-09	4.35774629	0.465077949	0.307691955	0.849812735	-2.112871993	2.10E-11	4.461842951	0.495013053	0.298693915	3.753395476	0.192902165	1	6.248612796	1.077073201	0.000289766	2.202759442	-0.602616307	1	0.97245713	-1.83662132	0.000264515	4.499686034	0.48979435	0.217215455	1.477815998	-1.192641327	0.951640972	6.33469451	1.007399402	0.057349587	0.493160611	-2.806029113	6.48E-06	1.2870566	-1.376545725	1	4.217745925	0.333784815	1	5.362127836	0.614136878	0.724684135
ENSBTAG00000031579	SGO2	0.409292844	-1.983000445	1.67E-09	3.638608964	1.694352335	1.41E-14	0.391638178	-2.055583933	8.95E-11	3.319992201	1.446905174	2.30E-09	0.462379134	-1.764815071	4.91E-05	1.06609374	-0.517013671	0.779712632	2.800952901	0.928691133	0.398564038	0.406871153	-1.921106092	0.000328921	1.529994837	0.058278843	1	1.428109379	-0.048526351	1	0.930363435	-0.695177242	0.830867058	0.370770386	-2.037600489	0.001242889	1.481611668	-0.000258334	1	0.875993384	-0.752198409	1	1.357500718	-0.144007067	0.724684135
ENSBTAG00000013235	TINAGL1	0.037889327	-2.330297451	1.77E-09	0.039910239	-2.283026215	1.18E-10	0.032425957	-2.566038872	9.71E-12	0.081101012	-1.199906043	0.003791029	0.078855356	-1.207838094	0.047355181	0.048047955	-1.969059638	4.06E-06	0.907846543	2.428934419	0.034095845	0.12539348	-0.491242146	0.801118179	1.181216966	4.058460554	3.84E-76	0.21603261	0.330061397	1	0.09466185	-0.904776238	0.732336382	0.023998083	-2.847158039	0.000100448	0.089794647	-0.757754118	1	0.216294663	0.368613462	1	0.135750072	0.129969411	0.724684135
ENSBTAG00000026936	ZGRF1	0.083268404	-2.118557329	2.24E-09	0.437883094	0.487542801	0.294866735	0.050533958	-2.859982723	8.77E-16	0.489180704	0.669232328	0.076228162	0.373368164	0.198154519	1	0.604643081	1.031566844	0.001281889	0.914884113	1.491585733	0.206069783	0.106102176	-1.687292218	0.00355405	0.326203252	-0.016536058	1	0.315445847	-0.060739314	1	0.668370032	1.107702454	0.020472722	0.047996166	-2.802777927	2.67E-05	0.26938394	-0.236998728	1	0.216294663	-0.55685616	1	0.135750072	-0.791786278	0.788755422
ENSBTAG00000050614	ENSBTAG00000050614	0.002202868	-3.437404007	2.76E-09	0.033886052	0.506399546	0.4677244	0.00463228	-2.493443741	5.34E-07	0.045914329	1.033908224	0.005586993	0.007766058	-1.701331	0.016958822	0.051853734	1.236337573	0.000972353	0.00703757	-0.873860718	1	0.002630632	-2.941970071	0.000590489	0.038941219	0.712645969	0.115574884	0.022941516	-0.04242684	1	0.059283179	1.356082253	0.014821872	0.001199904	-3.471400527	0.000928927	0.014965774	0.209079018	1	0	-1.258606726	1	0	1.317959128	1
ENSBTAG00000011635	CENPN	0.162571646	-2.022496474	2.98E-09	1.213497174	1.269296085	1.06E-07	0.169709877	-1.965428085	1.64E-09	1.214798749	1.232220088	1.56E-06	0.393679392	-0.659933014	0.624375753	0.620341917	0.047936287	1	0.401141496	-0.57540693	1	0.108732808	-2.533192599	2.15E-06	0.739883154	0.330883898	0.516585341	0.741775688	0.310525509	1	0.588050887	-0.035969382	1	0.087593004	-2.819450422	1.01E-05	0.658494075	0.139762537	1	0.638069255	0.0919872	1	0.610875323	0.077282853	0.724684135
ENSBTAG00000013688	PGF	0.004846309	-3.206470444	3.00E-09	0.002635582	-4.058680835	8.52E-14	0.001684465	-4.555985207	5.20E-14	0.008153012	-2.498586857	9.42E-07	0.015532116	-1.520411548	0.047355181	0.001902889	-4.356755503	7.77E-11	0.168901682	2.036013736	0.155003025	0.007891897	-2.386632739	0.004020333	0.374174318	5.28380267	1.53E-92	0.070736341	0.761400709	0.954409037	0.013386524	-1.660449471	0.213942458	0.005999521	-2.654075316	0.006772059	0.044897323	0.437944284	1	0.010814733	-1.030252747	1	0.067875036	1.546313108	0.724684135
ENSBTAG00000021218	MYLPF	2.382621854	-2.011030893	3.02E-09	4.499314685	-1.067697601	0.001564965	19.86279349	1.472336962	8.11E-10	0.654815574	-3.913326891	2.13E-26	0.557363995	-4.095017878	6.88E-20	2.72446178	-1.800457332	1.61E-06	15.7008189	0.844231327	0.603262465	0.56120159	-4.043706197	1.92E-12	0.865172293	-3.464127696	6.79E-18	3.114310815	-1.516686802	0.951640972	0.515381184	-4.159552974	3.33E-11	102.0182517	4.510535231	8.90E-72	3.352333471	-1.400698516	1	15.65973359	0.832319378	1	29.18626544	1.650711622	0.724684135
ENSBTAG00000047206	HIST1H1E	0.403124814	-1.944603142	3.31E-09	1.802737968	0.413826727	0.444572661	0.429117531	-1.857866677	3.52E-09	2.554896415	1.023115933	0.000194906	0.746736327	-0.986825935	0.06990951	2.748247897	1.13577872	0.000105169	0.520780188	-1.440370635	1	0.292000202	-2.345599393	8.17E-06	1.72978022	0.321946202	0.52792012	1.294283869	-0.133486771	1	2.528140722	0.903165264	0.144421304	0.419966457	-1.796511396	0.004947969	0.808151819	-0.805962951	1	0.486662991	-1.528951376	1	0.475125251	-1.477983442	0.803504593
ENSBTAG00000003329	FST	0.258176111	-2.114630815	3.58E-09	0.279371673	-2.022800842	7.25E-10	0.251406443	-2.161187323	3.30E-10	0.615337833	-0.801587331	0.074411758	0.453418298	-1.239202265	0.023279778	0.325869796	-1.757111891	1.21E-05	3.4132215	1.765702436	0.138397472	0.541910285	-0.949195451	0.241212783	6.818099458	4.015048005	8.14E-80	1.022809261	0.008633401	1	0.545978953	-0.934336359	0.617994693	0.161987062	-2.695695382	5.99E-05	0.748288721	-0.436618232	1	0.692142921	-0.5503374	1	1.086000574	0.08773896	0.724684135
ENSBTAG00000010859	HYLS1	0.044057357	-2.135864568	3.58E-09	0.363710292	1.305671636	1.34E-07	0.037900469	-2.364862936	1.68E-11	0.387911716	1.390407343	6.73E-08	0.08303708	-1.158092608	0.039767789	0.216929382	0.332876603	1	0.168901682	-0.022808264	0.989178857	0.038582609	-2.240266028	8.44E-05	0.193012997	0.137911361	0.860118607	0.131913718	-0.420066744	1	0.163506832	-0.117427701	1	0.053995687	-1.731580936	0.011579094	0.059863098	-1.270373908	1	0.20547993	0.271346226	1	0.271500144	0.841483902	0.724684135
ENSBTAG00000051299	ENSBTAG00000051299	0.146270424	-2.012948932	3.92E-09	0.519586131	-0.060045129	1	0.094330056	-2.668347237	3.59E-15	0.751364398	0.561785066	0.187575592	0.761671054	0.558548735	0.538004478	0.995686835	1.046551971	0.000684678	0.760057571	0.504136882	0.634409417	0.292000202	-0.922082462	0.222164457	0.769794525	0.580033436	0.118916931	0.491330804	-0.133655309	1	1.001120778	0.967753743	0.090582117	0.056395496	-3.285270035	4.68E-07	0.224486616	-1.194267588	1	0.259553595	-1.01385114	1	0.407250215	-0.276322046	0.724684135
ENSBTAG00000002918	RAD51	0.101331921	-2.035628951	4.13E-09	0.511679386	0.515789292	0.223066549	0.102752382	-2.022036375	1.06E-09	0.557408539	0.652959616	0.082867338	0.391289836	0.050051082	1	0.657448259	0.930905509	0.005375759	0.408179066	0.120693241	0.862678294	0.115747828	-1.76577512	0.001584053	0.526553	0.532007763	0.176451884	0.388093981	0.037794345	1	0.600481231	0.712856706	0.401022432	0.056395496	-2.776739995	1.98E-05	0.299315488	-0.294322788	1	0.291997795	-0.34259081	1	0.407250215	0.22977156	0.724684135
ENSBTAG00000033690	BARD1	0.060358579	-2.09308768	4.53E-09	0.280501208	0.298523014	0.733340697	0.050112842	-2.374868812	8.04E-12	0.34071007	0.626278174	0.099357306	0.262851187	0.176667986	1	0.509498615	1.338408558	2.41E-06	0.408179066	0.815531911	0.476475188	0.071027076	-1.776127484	0.002047072	0.22010254	-0.104820269	1	0.189267508	-0.312004091	1	0.455141824	1.032134937	0.044820474	0.053995687	-2.145319295	0.001294335	0.284349714	0.325102815	1	0.108147331	-1.005006138	1	0	-1.891092204	1
ENSBTAG00000020301	BLM	0.083268404	-2.073585945	4.78E-09	0.442024723	0.558022989	0.164237538	0.081696566	-2.109076422	5.45E-10	0.408508799	0.409201112	0.55809395	0.323784872	0.019713835	1	0.550886457	0.918812632	0.007937326	0.738944861	1.224582687	0.296164357	0.097333401	-1.768620273	0.002040178	0.471245182	0.630314718	0.070296019	0.261915643	-0.289258136	1	0.579445264	0.926541265	0.107875181	0.062395016	-2.385666062	0.000314194	0.194555067	-0.635032923	1	0.216294663	-0.51311706	1	0.407250215	0.47516539	0.724684135
ENSBTAG00000039552	PLK4	0.066526609	-2.058607613	5.53E-09	0.426211232	0.918887245	0.000950512	0.053481773	-2.388108034	4.03E-12	0.522221857	1.273778443	9.63E-07	0.195346223	-0.404200154	1	0.342044355	0.497199341	0.577832386	0.387066356	0.631979114	0.572997911	0.048228262	-2.442104141	1.11E-05	0.26017249	0.043455296	1	0.31735764	0.340110311	0.995180414	0.337531647	0.443572192	1	0.037197029	-2.780153233	3.08E-05	0.344212812	0.482884321	1	0.086517865	-1.401358873	1	0.067875036	-0.996812135	0.912816717
ENSBTAG00000012068	BRIP1	0.013657781	-2.477419686	5.57E-09	0.098646063	0.579753411	0.188495023	0.012212373	-2.646907052	1.42E-10	0.125728023	0.99927634	0.001929306	0.065115408	-0.118478758	1	0.131775085	1.065112702	0.002416793	0.161864112	1.259277614	0.32818549	0.015783795	-2.157278611	0.001268358	0.072238782	0.043547515	1	0.055441997	-0.314414244	1	0.12525962	0.899782789	0.241292404	0.005999521	-3.357743746	5.44E-05	0.059863098	0.058626761	1	0.075703132	0.275216926	1	0	-0.15573407	1
ENSBTAG00000008758	KIF20A	0.238790874	-1.973456907	6.18E-09	2.001536139	1.57904011	2.00E-12	0.247616396	-1.926107996	2.98E-09	1.88034197	1.399443762	1.25E-08	0.413393231	-1.118312271	0.037729706	0.578478352	-0.620998803	0.467279206	1.259725048	0.561186742	0.595120908	0.176252374	-2.344566618	1.03E-05	1.012471685	0.270303086	0.638774521	0.879424785	0.041170261	1	0.676019475	-0.356671067	1	0.113990895	-2.950746551	3.75E-06	0.733322947	-0.215465567	1	0.616439789	-0.465337944	1	0.678750359	-0.291492775	0.724684135
ENSBTAG00000053626	ENSBTAG00000053626	0.11234626	-2.154566314	6.20E-09	0.197668637	-1.328820455	0.00016741	0.943721674	1.290080196	7.18E-07	0.019309765	-4.709818138	1.17E-27	0.010753003	-5.457266764	1.79E-22	0.105610357	-2.234269015	4.35E-08	2.526487667	2.51570212	0.023583254	0.009645652	-5.524436127	2.34E-15	0.026525178	-4.205543571	2.55E-19	0.338387363	-0.433834986	1	0.012430344	-5.169313602	2.68E-12	5.667147359	4.705984307	8.37E-74	0.314281263	-0.491277319	1	0.140591531	-1.609395574	1	0.067875036	-1.842182604	0.969535332
ENSBTAG00000002655	ZWINT	0.044057357	-2.094342086	7.36E-09	0.307233538	1.028794896	8.73E-05	0.048849493	-1.949110218	1.48E-08	0.341997387	1.200737312	5.33E-06	0.109919587	-0.693179223	0.603730574	0.218356549	0.390511011	0.982341502	0.112601122	-0.542168301	1	0.050858894	-1.802415548	0.001983937	0.233082946	0.489449594	0.21509888	0.152943441	-0.163428823	1	0.175937176	0.036179833	1	0.034797221	-2.314531679	0.000624739	0.119726195	-0.380292701	1	0.237924129	0.514812895	1	0.135750072	0.143963532	0.724684135
ENSBTAG00000039129	ENSBTAG00000039129	0.044938504	-2.099189021	7.51E-09	0.113330018	-0.71659745	0.108592208	0.040427167	-2.262617427	1.16E-10	0.149757952	-0.264031796	0.997596906	0.13381515	-0.427431495	1	0.158891258	-0.166088964	1	0.443366916	1.357626836	0.251414904	0.078042096	-1.213184671	0.070466878	0.763022139	2.713486945	2.13E-31	0.13956089	-0.330711402	1	0.323188943	0.946692382	0.100430556	0.025197987	-2.798738059	4.80E-05	0.074828872	-0.999622244	1	0.129776798	-0.345840732	1	0.067875036	-0.474445452	0.845598349
ENSBTAG00000034885	RGCC	0.010573766	-2.560407961	7.58E-09	0.00677721	-3.224473892	8.52E-14	0.005053396	-3.593822028	2.92E-14	0.050634494	-0.222471806	1	0.0764658	0.441204469	1	0.009038724	-2.763902217	2.51E-08	0.056300561	0.105096867	0.952754555	0.192036169	1.948147957	2.65E-08	0.264123048	2.824091432	3.34E-29	0.059265583	0.063345032	1	0.054502277	-0.083096942	1	0.005999521	-3.081316955	0.000301762	0.029931549	-0.404738345	1	0.032444199	-0.45310975	1	0	0.119562188	1
ENSBTAG00000007431	CEMIP	0.003524589	-3.476932371	8.21E-09	0.003388605	-3.583188711	1.51E-10	0.002526698	-3.917583447	1.09E-10	0.0145896	-1.509234101	0.011001709	0.027479897	-0.526781241	1	0.004281501	-3.197935748	1.05E-06	0.380028786	3.387570381	0.003604515	0.056997036	0.599571616	0.5580638	0.259608124	3.962500609	5.68E-44	0.030588688	-0.285407181	1	0.033466311	-0.204517082	1	0.003599712	-3.093633905	0.005496555	0.014965774	-0.417022177	1	0	-1.883660249	1	0.067875036	1.694835633	0.724684135
ENSBTAG00000004645	ADAMTSL3	0.010133192	-2.562559138	8.42E-09	0.013930932	-2.140383277	7.68E-08	0.009685675	-2.636746219	8.33E-10	0.024459035	-1.285174317	0.004971332	0.031064231	-0.889644264	0.418993513	0.023310394	-1.34234425	0.01102971	0.161864112	1.597919294	0.229854783	0.042090119	-0.411550372	0.909982253	0.372481222	3.972829032	1.60E-64	0.072648134	0.417004779	0.994129097	0.038247212	-0.547560435	1	0.015598754	-1.790942029	0.033338739	0.059863098	0.391878628	1	0.021629466	-0.81249922	1	0	0.176404984	1
ENSBTAG00000013556	UNC13D	0.095163891	-2.064515898	8.51E-09	0.133285138	-1.584590333	1.73E-06	0.072432007	-2.475065212	1.57E-12	0.140317623	-1.487685376	4.36E-05	0.198333169	-0.93207034	0.201844666	0.187434598	-1.036486632	0.034002256	0.527817758	0.552305989	0.616447267	0.110486563	-1.770229187	0.002429297	2.327443272	3.845348506	1.07E-72	0.550596387	0.622744758	0.952111684	0.354742893	-0.034363613	1	0.077993771	-2.250873647	0.000806032	0.344212812	-0.038639303	1	0.519107191	0.531639687	1	0.203625108	-0.515922088	0.731812052
ENSBTAG00000003425	MGME1	0.078422095	-2.008328197	1.03E-08	0.476287287	0.883592468	0.001752651	0.08927666	-1.822368124	4.83E-08	0.417520022	0.625976828	0.112921061	0.259864242	-0.163065307	1	0.452887658	0.756151995	0.067410678	0.415216636	0.543298003	0.622903903	0.071903954	-2.056520476	0.000210973	0.357243354	0.344510824	0.450924924	0.246621298	-0.224702544	1	0.462791267	0.73398642	0.381774135	0.058795304	-2.319927252	0.00040741	0.359178586	0.35394593	1	0.183850463	-0.586537676	1	0.203625108	-0.183578511	0.724684135
ENSBTAG00000019886	BORA	0.097366758	-2.016505856	1.08E-08	0.597147539	0.893360531	0.001601844	0.082959915	-2.260962826	3.55E-11	0.636793127	0.986803989	0.000701301	0.1529316	-1.308231386	0.010514918	0.203133435	-0.89889606	0.09685926	0.886733833	1.317725216	0.257358828	0.1324085	-1.49174444	0.012514718	1.014729147	1.793001393	2.19E-12	0.357505293	-0.005403345	1	0.270599026	-0.428833925	1	0.082793387	-2.151387373	0.001137389	0.329247037	-0.086588048	1	0.410959859	0.213926809	1	0.543000287	0.66867949	0.724684135
ENSBTAG00000000892	CGAS	0.009252045	-2.51557908	1.12E-08	0.036898146	-0.481039251	0.604099357	0.008843443	-2.589766161	1.08E-09	0.04891807	-0.020605935	1	0.068102353	0.512088046	0.838952889	0.117979138	1.514241423	3.42E-07	0.01407514	-1.258778228	1	0.02104506	-1.240092928	0.125644992	0.078446803	0.749527583	0.046991642	0.032500481	-0.552978454	1	0.133865242	1.581089437	0.00021163	0.004799617	-3.116305568	0.000257875	0.014965774	-0.762322022	1	0.064888399	0.587946084	1	0	0.348016362	1
ENSBTAG00000004207	CD93	0.05551227	1.733657422	1.16E-08	0.020331631	-0.061932088	1	0.055587354	1.757094986	1.85E-09	0.003003741	-2.80619528	7.48E-07	0.001792167	-3.28782097	1.81E-05	0.016650282	-0.363540108	1	0	-1.627422822	0.890440052	0.000876877	-3.697965719	0.000180396	0.001693096	-3.377975428	6.18E-07	0.015294344	-0.331101373	1	0.004780902	-1.966357345	0.104071613	0.032397412	0.681170445	0.449444813	0.044897323	1.466164158	1	0.021629466	0.582860794	1	0.067875036	2.570915081	0.724684135
ENSBTAG00000039709	PARPBP	0.080624963	-1.988518737	1.21E-08	0.69089895	1.597841537	2.49E-12	0.090961125	-1.815859861	4.54E-08	0.605039292	1.279664639	7.19E-07	0.167268937	-0.862031521	0.255194015	0.281627619	-0.061343853	1	0.267427664	-0.104484068	1	0.056997036	-2.412523219	1.11E-05	0.299678074	0.038732545	1	0.130001925	-1.175696621	0.951640972	0.281117009	-0.058708099	1	0.034797221	-3.082878595	3.69E-06	0.059863098	-1.99385025	1	0.259553595	-0.131441577	1	0.33937518	0.381300954	0.724684135
ENSBTAG00000032340	KNSTRN	0.311485512	-1.916193046	1.39E-08	2.884832562	1.886632915	3.40E-18	0.193713507	-2.627309015	3.53E-15	2.554896415	1.558777279	5.56E-11	0.427133179	-1.409964775	0.002486493	0.634613587	-0.829547412	0.104938848	0.640418879	-0.744105802	1	0.293753957	-1.932030028	0.00031433	1.009085492	-0.098302372	1	0.965455471	-0.157192595	1	0.542154232	-1.025458754	0.388603986	0.166786679	-2.732517447	1.49E-05	0.91291224	-0.232657074	1	1.124732247	0.065731414	1	1.15387561	0.091817884	0.724684135
ENSBTAG00000051969	HIST1H2AG	0.006608604	-2.652694312	1.44E-08	0.056100242	0.602834021	0.196870909	0.009685675	-2.126300932	6.78E-07	0.074235317	1.091913828	0.000708091	0.014934727	-1.443272542	0.029945022	0.078494184	1.172717848	0.000758097	0.042225421	0.29776859	0.887563476	0.008768775	-2.116543576	0.00394648	0.051921625	0.443583114	0.383850608	0.021029723	-0.817172116	0.992403538	0.075538244	1.017976513	0.141942595	0.007199425	-2.29977122	0.006794965	0.029931549	0.150662332	1	0.010814733	-0.900915279	1	0	0.673746027	1
ENSBTAG00000019437	SLFN11	0.028637282	-2.177644733	1.45E-08	0.224400967	1.136817057	1.82E-05	0.026951445	-2.274512255	7.94E-10	0.296083058	1.648096204	4.13E-11	0.069297131	-0.828480687	0.400777855	0.074688406	-0.731729593	0.403050454	0.260390094	1.168162497	0.331786099	0.037705732	-1.690534959	0.007169748	0.197527921	0.832239295	0.011891552	0.055441997	-1.080206522	0.954409037	0.09466185	-0.336971638	1	0.013198946	-3.109043345	3.03E-05	0.014965774	-2.019898638	1	0.086517865	-0.310224002	1	0.203625108	1.09323139	0.724684135
ENSBTAG00000053621	ENSBTAG00000053621	0.001762294	-3.462432801	1.45E-08	0.029744423	0.571202412	0.377856637	0.001684465	-3.536619882	2.26E-09	0.044627012	1.293413819	0.000163136	0.009558225	-1.164288874	0.277486949	0.043290732	1.211200572	0.002518164	0.02815028	0.69804563	0.747747955	0.00350751	-2.376037624	0.007736987	0.026525178	0.360970531	0.617386438	0.017206137	-0.186293781	1	0.043028114	1.1111783	0.152211683	0.003599712	-2.224962632	0.027056365	0	-0.555052328	1	0	-1.019760373	1	0	1.556805482	1
ENSBTAG00000021697	PDGFB	0.169620824	1.498270666	1.52E-08	0.089986294	0.357527208	0.679562869	0.082538799	0.205976634	0.781802121	0.038190423	-1.016717849	0.02829975	0.045998958	-0.703680284	0.725140323	0.07563985	0.061199479	1	0.070375701	0.069805911	0.96778625	0.01753755	-2.060929601	0.001550128	0.008465482	-3.145604071	1.49E-10	0.082207099	0.202449475	1	0.019123606	-1.928532683	0.0171407	0.14998802	1.11526628	0.017652935	0.074828872	0.273073872	1	0.097332598	0.549492045	1	0.067875036	0.795820523	0.724684135
ENSBTAG00000052518	TUBB4B	2.892365472	-1.837963576	1.64E-08	19.67311227	1.335576661	7.82E-09	4.930850997	-1.034036295	0.001384131	17.0080407	1.017935197	0.000186877	4.80838456	-1.042152474	0.041732624	8.396499113	-0.190918857	1	10.7111817	0.173043702	1	2.467533242	-2.004333629	5.75E-05	12.99451536	0.515430967	0.181011698	3.871380848	-1.313337062	0.951640972	8.678292434	-0.130919584	1	5.089993457	-0.924160213	0.194331128	3.487025441	-1.456739244	1	9.830592424	0.043348824	1	13.77863229	0.456938327	0.724684135
ENSBTAG00000018810	THBS2	0.029077855	-2.418438728	1.64E-08	0.021084655	-2.917292383	5.75E-13	0.014317955	-3.4467814	7.45E-15	0.042910588	-1.850912113	1.34E-05	0.035245955	-2.092017337	0.000167806	0.019504616	-2.980739893	8.32E-10	1.780505236	3.770418006	7.02E-06	0.113117196	-0.340986207	0.989833474	0.998926913	4.196100254	6.70E-72	0.227503368	0.709870408	0.951640972	0.034422491	-2.072553628	0.016342354	0.0287977	-2.300461706	0.004973252	0.179589293	0.430172712	1	0.086517865	-0.567186584	1	0.203625108	0.836788042	0.724684135
ENSBTAG00000002620	DNA2	0.012776633	-2.359601855	1.64E-08	0.088103735	0.636644551	0.105548971	0.013475722	-2.292473798	8.23E-09	0.104701835	0.929278145	0.004736593	0.054362405	-0.172601861	1	0.117503415	1.11984197	0.000751887	0.126676262	1.128023106	0.384652653	0.01052253	-2.501068525	0.000173556	0.079575534	0.432141595	0.359653848	0.024853309	-1.22099206	0.951640972	0.09466185	0.687827912	0.630762833	0	-5.739889363	6.52E-08	0.014965774	-1.058171984	1	0.043258933	-0.197232048	1	0	0.052447992	1
ENSBTAG00000011661	CEP152	0.039651621	-2.056829917	1.91E-08	0.188632356	0.376083752	0.555211434	0.027372561	-2.607259824	7.12E-13	0.254459787	0.892561628	0.003435803	0.1529316	0.018734593	1	0.245472722	0.812915837	0.032417806	0.323728225	1.127916157	0.341726139	0.058750791	-1.402585656	0.026603127	0.198092286	0.435464257	0.306216468	0.126178339	-0.252560441	1	0.288766452	1.011099811	0.062528852	0.021598275	-2.790439085	6.19E-05	0.104760421	-0.363409818	1	0.064888399	-1.021263963	1	0.067875036	-0.254555538	0.819868279
ENSBTAG00000017582	CHEK1	0.11234626	-1.930458848	2.51E-08	0.440518676	0.198765462	0.959712993	0.080854334	-2.424747146	8.49E-13	0.535095034	0.525358839	0.260166411	0.482092973	0.332162459	1	0.632710698	0.805954877	0.033933515	0.591155889	0.605574936	0.576274519	0.206066209	-0.965419225	0.191973874	0.633218077	0.78690533	0.016065061	0.332651984	-0.237068348	1	0.711398146	0.930811484	0.097132819	0.062395016	-2.679679954	3.75E-05	0.254418165	-0.563995083	1	0.248738862	-0.612502321	1	0.543000287	0.546119523	0.724684135
ENSBTAG00000013100	SPAG5	0.114989701	-1.934777471	2.57E-08	0.907016659	1.501304298	7.92E-11	0.058114052	-2.947238867	6.36E-17	0.910133574	1.457583281	3.62E-09	0.189969722	-1.150194606	0.034501095	0.32872413	-0.32212691	1	0.69671944	0.804879036	0.47442436	0.078042096	-2.42311463	9.24E-06	0.476888837	0.274242032	0.589685767	0.416770876	0.056529969	1	0.34804963	-0.217425648	1	0.045596358	-3.162710354	1.87E-06	0.463939007	0.231042271	1	0.324441994	-0.279658607	1	0.33937518	-0.077047118	0.724684135
ENSBTAG00000021254	CENPI	0.057715137	-1.992550853	2.80E-08	0.430729372	1.300622737	1.39E-07	0.06527303	-1.816775919	1.00E-07	0.466008987	1.413671775	3.06E-08	0.106932642	-1.037695087	0.095841834	0.200754823	-0.074883611	1	0.323728225	0.646850124	0.572044267	0.072780831	-1.575975195	0.008357316	0.254528835	0.306725415	0.533762626	0.086030686	-1.286713379	0.951640972	0.194104602	-0.11869733	1	0.0575954	-1.889840611	0.005283318	0.044897323	-1.840364539	1	0.097332598	-0.980982608	1	0.271500144	0.593781455	0.724684135
ENSBTAG00000017329	GMNN	0.283288804	-1.873430069	2.88E-08	0.948056433	-0.001677804	1	0.229087278	-2.196595072	1.68E-11	1.135843267	0.299341851	0.81232821	1.446278919	0.682341822	0.233488121	1.822016521	1.115613135	0.000166364	0.851545982	-0.155715227	1	0.44633064	-1.134650362	0.078166501	1.306506104	0.517883227	0.183978088	0.523831285	-0.872985613	0.964033473	1.917141508	1.101968331	0.023130572	0.13558917	-2.851745308	6.49E-06	0.448973233	-1.056613199	1	0.875993384	-0.113880748	1	1.086000574	0.187391844	0.724684135
ENSBTAG00000014711	DBF4	0.217643342	-1.875643084	3.08E-08	1.390081156	1.156348486	2.46E-06	0.169709877	-2.252657529	6.82E-12	1.587262654	1.377018765	2.35E-08	0.422354067	-0.846796922	0.255194015	0.738321055	0.01748467	1	0.66856916	-0.123774047	1	0.277093285	-1.451211842	0.011440723	0.855578079	0.253686611	0.674558141	0.858395062	0.240327405	1	0.738171194	0.016402375	1	0.122390225	-2.619044532	3.45E-05	0.823117593	0.177386358	1	0.508292458	-0.510547012	1	0.543000287	-0.353072196	0.724684135
ENSBTAG00000019120	WDHD1	0.184159751	-1.881795289	3.25E-08	0.955963179	0.754706548	0.012306559	0.213084858	-1.66977002	2.75E-07	0.783547339	0.389533213	0.585428298	0.630842849	0.02565609	1	1.103675804	0.976233865	0.002330612	0.745982431	0.270400172	0.766059529	0.227988146	-1.498153311	0.008887535	0.664822545	0.109533425	0.947315732	0.554419973	-0.165524854	1	1.07187812	0.849849967	0.222009522	0.141588691	-2.17231031	0.000633172	0.613596751	-0.00379224	1	0.335256727	-0.862041887	1	0.678750359	0.171388186	0.724684135
ENSBTAG00000011416	ARHGEF39	0.059918005	-1.955553155	3.70E-08	0.460473796	1.411551156	3.19E-09	0.053902889	-2.119483344	5.88E-10	0.449273857	1.31770119	3.37E-07	0.111711755	-0.990689807	0.121502466	0.199803378	-0.102479601	1	0.365953645	0.804256181	0.484555094	0.051735772	-2.088335053	0.000207816	0.240984063	0.198324006	0.747490292	0.233238747	0.142096925	1	0.196016962	-0.122698435	1	0.029997604	-2.83045053	2.71E-05	0.13469197	-0.534192019	1	0.194665197	-0.069691882	1	0.067875036	-0.747108559	0.882749168
ENSBTAG00000032372	HASPIN	0.03216187	-2.057039085	3.98E-08	0.191267938	0.77112983	0.01327805	0.030320375	-2.151489264	2.15E-09	0.252314258	1.262847203	2.00E-06	0.068699742	-0.892183189	0.273320685	0.173162928	0.567850402	0.398451064	0.126676262	0.107435109	0.913836189	0.01753755	-2.821018807	3.07E-06	0.141655737	0.227659592	0.704159615	0.162502406	0.425711356	0.980210086	0.18836752	0.662551858	0.592221176	0.039596837	-1.641247598	0.023870228	0.164623519	0.523080197	1	0.118962065	0.058372153	1	0	-0.956802061	1
ENSBTAG00000005696	DBF4B	0.007049177	-2.555490077	4.57E-08	0.07793792	1.229356444	2.12E-05	0.010106792	-2.057559457	1.52E-06	0.083675647	1.329268518	8.37E-06	0.020311228	-0.988612952	0.311731712	0.036630619	-0.108043094	1	0.077413271	1.09274662	0.44541357	0.004384387	-2.992940143	8.97E-05	0.050792894	0.416557879	0.438566716	0.05735379	0.597180239	0.960875194	0.047809015	0.316309906	1	0.007199425	-2.292076828	0.007804982	0.074828872	1.164082848	1	0.032444199	0.110565113	1	0	0.681379352	1
ENSBTAG00000000949	DNAJC9	0.084590125	-1.904561826	4.80E-08	0.289537489	-0.003414355	1	0.053902889	-2.577179429	8.23E-14	0.312818187	0.124497702	1	0.459989578	0.748404621	0.114240751	0.671719929	1.467085194	4.79E-08	0.253352524	-0.168660025	1	0.105225298	-1.511096934	0.009959935	0.325638886	0.185224119	0.761169456	0.065000962	-2.151528363	0.951640972	0.657852049	1.290885023	0.002162668	0.047996166	-2.617050052	6.49E-05	0.044897323	-2.303816494	1	0.281183062	-0.007618711	1	0.203625108	-0.191958684	0.724684135
ENSBTAG00000017021	MCM4	0.586403419	-1.785393069	4.90E-08	2.269612462	0.347842025	0.628230753	0.537765541	-1.921582192	9.32E-10	2.209037075	0.294343215	0.823631091	2.198989137	0.274558599	1	3.284386962	0.972745745	0.002160747	2.463149536	0.409886465	0.675691766	0.612060484	-1.655912552	0.002483568	2.606239823	0.554980838	0.136648479	2.016941627	0.126232538	1	3.49770755	0.993826332	0.066321022	0.261579107	-2.873641694	4.49E-06	1.885687577	0.016950387	1	1.319397443	-0.494092183	1	1.561125826	-0.279139896	0.724684135
ENSBTAG00000000897	IQGAP2	0.010133192	-2.591209343	5.17E-08	0.007530234	-3.048111593	1.53E-11	0.00800121	-2.933824088	3.74E-10	0.017593341	-1.802593043	0.000114794	0.008960836	-2.697505235	1.04E-05	0.007611557	-2.973091392	3.37E-08	0.246314954	2.170533402	0.105180134	0.036828854	-0.637614943	0.720521845	0.467858989	4.947347195	4.52E-91	0.061177376	0.138737061	1	0.012430344	-2.163470358	0.023130572	0.002399808	-4.056363028	4.44E-05	0.029931549	-0.375883482	1	0.010814733	-1.426878209	1	0	0.148364679	1
ENSBTAG00000005979	HELLS	0.158165911	-1.868581209	5.17E-08	0.516197526	-0.03975771	1	0.10527908	-2.479185939	1.79E-13	0.681849245	0.426565945	0.492895024	0.704321704	0.46088517	0.86485652	0.922425597	0.942722961	0.004359023	1.111936076	1.08336172	0.337862661	0.324444669	-0.737128127	0.426452445	0.773180718	0.618513407	0.086962845	0.397652946	-0.417036658	1	1.097694988	1.146813017	0.015944819	0.074394058	-2.863690913	9.13E-06	0.314281263	-0.706959686	1	0.400145126	-0.380872261	1	0.33937518	-0.471866908	0.724684135
ENSBTAG00000010179	COL5A3	0.079303242	1.697869448	5.25E-08	0.021084655	-0.608885428	0.524758566	0.018529118	-0.795841979	0.171805696	0.032612047	0.096822432	1	0.024492952	-0.339633958	1	0.017126004	-0.899920996	0.468219359	0.112601122	1.96254036	0.186573161	0.046474507	0.651665305	0.458745826	0.010158579	-1.633176743	0.004863003	0.043971239	0.575507474	0.971074806	0.010517983	-1.49411567	0.381774135	0.038396933	0.362573812	0.806288523	0.044897323	0.925818432	1	0.021629466	0.043625567	1	0	1.0303467	1
ENSBTAG00000007101	F3	0.012776633	-2.485872716	5.72E-08	0.010165816	-2.84794191	4.26E-11	0.007580094	-3.231754326	5.03E-12	0.035186682	-0.998016543	0.069483431	0.059738906	-0.160124204	1	0.019028893	-1.897323885	0.000204506	0.365953645	2.522624556	0.045592213	0.054366404	-0.290205551	1	0.400135131	3.623620924	8.86E-48	0.07647172	0.23593922	1	0.087012408	0.423530136	1	0.009599233	-2.684108484	0.002129721	0.014965774	-1.181534098	1	0.097332598	0.684809745	1	0.067875036	0.930323712	0.724684135
ENSBTAG00000001500	FIGNL1	0.029518429	-2.045517472	5.72E-08	0.149475141	0.493581515	0.286755471	0.021476932	-2.517820052	1.18E-11	0.150187058	0.490846495	0.343454549	0.123659536	0.157770923	1	0.219307994	1.147929237	0.000186879	0.070375701	-0.552203577	1	0.044720752	-1.357237794	0.040618319	0.139398275	0.351540285	0.474550179	0.065000962	-0.768176888	0.98954227	0.212272027	0.998829078	0.079305222	0.021598275	-2.355818717	0.000849843	0.074828872	-0.347115598	1	0.194665197	0.859952783	1	0.067875036	0.177079298	0.771854757
ENSBTAG00000006587	ZNF367	0.098688479	-1.871313024	7.69E-08	0.346014242	0.075341105	1	0.081696566	-2.159053204	1.32E-10	0.419665552	0.397862386	0.576637889	0.504196368	0.682343677	0.211061835	0.720719329	1.350413312	1.13E-06	0.506705047	0.629579077	0.5717791	0.128024113	-1.417420243	0.017440354	0.270895434	-0.31385115	0.705415315	0.346034535	0.070837126	1	0.620561017	0.982555923	0.064175084	0.085193196	-1.988091807	0.002370336	0.179589293	-0.790691673	1	0.151406264	-1.048490114	1	0.203625108	-0.381336048	0.729246133
ENSBTAG00000000590	POLE	0.003524589	-2.925690488	7.74E-08	0.036145122	0.520323017	0.441399085	0.006316745	-2.149664925	7.79E-06	0.033041153	0.35848104	0.845005253	0.033453787	0.370796787	1	0.056135235	1.278675631	0.000593889	0.02815028	0.375408769	0.958631668	0.009645652	-1.415661788	0.135450932	0.032168833	0.308893651	0.674227139	0.028676895	0.182827884	1	0.049721376	0.982613697	0.293464563	0.002399808	-2.96475427	0.003390073	0.014965774	0.127942256	1	0	-1.339580805	1	0	1.23698505	1
ENSBTAG00000007247	NUF2	0.410614565	-1.761062916	8.15E-08	2.73272184	1.394332202	1.38E-09	0.392901527	-1.833642749	5.31E-09	2.645866862	1.286400564	2.75E-07	0.909823541	-0.526735391	0.872853381	1.114617418	-0.217083847	1	1.681979255	0.398383811	0.683559439	0.291123325	-2.197621105	3.06E-05	1.472429558	0.22982583	0.719270401	0.546772801	-1.24294993	0.951640972	1.321441179	0.053652659	1	0.125989937	-3.38614346	1.19E-07	0.448973233	-1.483855993	1	1.330212176	0.056978264	1	1.561125826	0.258351705	0.724684135
ENSBTAG00000006925	CENPL	0.054190549	-1.948774101	8.38E-08	0.314010749	0.866421763	0.00243448	0.039163818	-2.434760502	7.94E-12	0.419236446	1.386398297	9.14E-08	0.114101311	-0.800552493	0.400678725	0.273064617	0.586397807	0.320831196	0.302615514	0.684654207	0.55170551	0.046474507	-2.089976777	0.00030656	0.225746195	0.261490208	0.626620644	0.175884957	-0.118102361	1	0.213228208	0.164576721	1	0.0287977	-2.736023804	7.16E-05	0.119726195	-0.535813492	1	0.194665197	0.081438989	1	0.271500144	0.726467242	0.724684135
ENSBTAG00000019901	RAD54L	0.012776633	-2.343011637	8.43E-08	0.081326525	0.513959743	0.342683622	0.010527908	-2.628774627	7.67E-10	0.091828659	0.714474648	0.09026642	0.059141517	-0.023845834	1	0.0979988	0.815833053	0.080740842	0.126676262	1.144453451	0.388743964	0.018414427	-1.714307359	0.018351735	0.085219189	0.56306339	0.197946211	0.074559927	0.343224393	1	0.112829276	0.982718894	0.165867946	0.011999042	-2.25171536	0.006419285	0.059863098	0.283707268	1	0.010814733	-1.506690791	1	0.067875036	1.069875064	0.724684135
ENSBTAG00000049555	ENSBTAG00000049555	0.001762294	-3.521468272	8.43E-08	0.027485353	0.3620919	0.849499498	0.004211163	-2.437590506	1.26E-05	0.036044894	0.824389328	0.123560594	0.011947781	-0.906150792	0.780470002	0.049950845	1.402096811	0.000563449	0.035187851	0.905451167	0.636794818	0.002630632	-2.760399766	0.005121959	0.033861929	0.690978052	0.19012897	0.015294344	-0.401490701	1	0.045896655	1.148170418	0.189622071	0.004799617	-1.95852965	0.093223519	0	-0.613524731	1	0.010814733	-0.074858049	1	0.135750072	3.090052946	0.724684135
ENSBTAG00000014230	VRK1	0.312807233	-1.803846733	8.82E-08	1.526754899	0.738731683	0.014363792	0.379004689	-1.521325586	2.32E-06	1.505303431	0.694965628	0.0459236	0.813046513	-0.324444137	1	1.491865225	0.667453069	0.143141526	0.830433272	-0.268109162	1	0.388456726	-1.417602303	0.013898362	1.391725293	0.535536383	0.161088356	0.671039347	-0.587794703	1	1.556661534	0.685127063	0.533565307	0.286777095	-1.844321935	0.003835098	0.463939007	-1.086604545	1	0.821919719	-0.281107069	1	1.289625682	0.346270998	0.724684135
ENSBTAG00000011340	NSL1	0.049784813	-1.923282735	9.38E-08	0.277112603	0.822281914	0.004646046	0.03663712	-2.382628236	1.37E-11	0.287071834	0.864598576	0.004847437	0.15890549	-0.135202549	1	0.273540339	0.764278113	0.052997883	0.133713832	-0.315625126	1	0.053489527	-1.738887187	0.003065359	0.210508327	0.312535774	0.525943193	0.154855234	-0.154701625	1	0.256256321	0.605872391	0.689079126	0.034797221	-2.323806652	0.000592906	0.104760421	-0.559870807	1	0.183850463	0.149725919	1	0.271500144	0.872603755	0.724684135
ENSBTAG00000025903	GLDC	0.024231546	-2.155961346	1.10E-07	0.019578608	-2.497952634	4.31E-11	0.013054606	-3.056169205	1.75E-13	0.054925553	-0.937043243	0.059225619	0.05734935	-0.841513326	0.454557257	0.025689006	-2.057696516	5.34E-06	0.309653085	1.680430087	0.187773564	0.058750791	-0.780033969	0.484610839	0.660871986	3.972747971	1.61E-68	0.114707581	0.229646102	1	0.108048374	0.134497838	1	0.011999042	-2.975748721	0.000143232	0.089794647	0.049600804	1	0.075703132	-0.221699437	1	0.203625108	1.351817932	0.724684135
ENSBTAG00000020685	ENSBTAG00000020685	0.014979501	-2.182180193	1.15E-07	0.160017468	1.747998572	4.01E-13	0.025266979	-1.422575331	0.000205263	0.111567529	0.981948527	0.001946579	0.037038122	-0.809894832	0.487974617	0.07754274	0.339212719	1	0.056300561	-0.012688422	1	0.008768775	-2.794856553	2.97E-05	0.051921625	-0.299866514	0.761169456	0.028676895	-1.076338705	0.954409037	0.048765195	-0.371169782	1	0.021598275	-1.520142776	0.057034615	0.014965774	-1.108071936	1	0.064888399	0.240568697	1	0.067875036	1.003785874	0.724684135
ENSBTAG00000003971	E2F1	0.04317621	-1.950154444	1.24E-07	0.169806772	0.173029683	0.982135352	0.062746332	-1.398596375	7.03E-05	0.175933411	0.229062774	0.956026907	0.161892436	0.088554909	1	0.295899289	1.124609796	0.000251206	0.197051963	0.403635882	0.716513771	0.047351384	-1.734053274	0.004020333	0.200349748	0.433106614	0.317446053	0.237062333	0.657918329	0.951640972	0.266774305	0.864092738	0.202009361	0.062395016	-1.311954451	0.08616553	0.284349714	0.946044612	1	0.108147331	-0.385624157	1	0	-1.273434048	1
ENSBTAG00000002898	UNC45B	0.021588105	-2.19698598	1.25E-07	0.033886052	-1.557889583	5.02E-05	0.152022992	0.87868529	0.00453493	0.009011224	-3.448336617	3.08E-14	0.008363447	-3.474039779	7.82E-10	0.019980338	-2.295487566	7.33E-07	0.274465234	1.633067895	0.206069783	0.00701502	-3.619043917	3.60E-07	0.008465482	-3.470249697	1.25E-11	0.066912755	-0.424492526	1	0.006693262	-3.657403765	5.37E-06	1.256299658	5.040016544	1.80E-79	0.074828872	-0.049477282	1	0.075703132	-0.097485737	1	0.067875036	0.474099578	0.727987978
ENSBTAG00000014921	IL6	0.002202868	-3.639037868	1.26E-07	0.003388605	-3.151790239	1.83E-07	0.002526698	-3.488216579	6.94E-08	0.011585859	-1.401230481	0.048207019	0.01254517	-1.232700444	0.431661413	0.002854334	-3.288986876	1.04E-05	0.112601122	2.052980577	0.207460254	0.019291305	-0.56891386	0.916034887	0.23138985	4.767124909	3.47E-55	0.017206137	-0.633274172	1	0.019123606	-0.573144673	1	0.001199904	-3.671478363	0.00496069	0	-0.993591262	1	0.032444199	0.549492045	1	0.067875036	2.120858993	0.724684135
ENSBTAG00000010721	MCM3	0.612397259	-1.729952905	1.27E-07	2.418334579	0.447766415	0.35668103	0.520078656	-1.981131489	3.09E-10	1.925398088	0.054210296	1	2.119536392	0.205161756	1	4.35000498	1.484462297	1.08E-08	2.427961685	0.379666603	0.692592108	0.491051391	-1.988328533	0.000177225	1.812741947	-0.043593071	1	1.745467019	-0.097559676	1	3.600975023	1.030412305	0.046432197	0.242380641	-2.993028057	1.93E-06	1.616303638	-0.213540864	1	1.211250112	-0.626091042	1	1.221750646	-0.625607632	0.724684135
ENSBTAG00000020701	MEF2C	0.004405736	-3.098987789	1.42E-07	0.004141629	-3.231592918	2.85E-09	0.017265769	-1.1745561	0.031625103	0.002145529	-4.027044987	3.40E-10	0.004181723	-3.075191518	4.91E-05	0.004281501	-3.11352004	2.25E-06	0.084450841	1.306650385	0.402443264	0.002630632	-3.486461614	0.000318471	0.054179087	0.63105008	0.240053236	0.024853309	-0.486526804	1	0.002868541	-3.354064696	0.003519435	0.589152944	5.641784366	5.63E-70	0.029931549	0.253473138	1	0.010814733	-0.798245236	1	0.067875036	1.778320618	0.724684135
ENSBTAG00000008169	C24H18orf54	0.020266384	-2.072639714	1.46E-07	0.128013974	0.850589605	0.005629516	0.011370141	-2.912714408	5.35E-13	0.158769176	1.226791403	9.59E-06	0.053167627	-0.602813819	0.885200032	0.070406905	-0.178532533	1	0.168901682	1.155528977	0.353936912	0.021921937	-1.860996942	0.003691582	0.158022337	1.158485727	0.000106367	0.095589651	0.307460517	1	0.084143867	0.109407796	1	0.009599233	-2.931434197	0.00012862	0.059863098	-0.102798747	1	0.054073666	-0.30351155	1	0.067875036	0.684252294	0.729643096
ENSBTAG00000047902	ULBP21	0.055071696	-1.893083491	1.84E-07	0.14269793	-0.450588235	0.575933126	0.050955075	-2.015481978	6.64E-09	0.160914705	-0.250706712	1	0.189372333	0.014414741	1	0.21645366	0.232354662	1	0.506705047	1.457982846	0.221217264	0.071027076	-1.444667937	0.020350415	0.63660427	2.164300922	3.07E-18	0.084118892	-1.153627592	0.951640972	0.431237317	1.311548203	0.002415235	0.017998562	-3.352628278	2.44E-06	0.014965774	-2.677801617	1	0.162220997	-0.136856777	1	0.067875036	-0.565943807	0.852706124
ENSBTAG00000017048	CENPJ	0.151557307	-1.800554764	1.84E-07	0.824560599	0.942583778	0.000490844	0.130546059	-2.029940011	8.70E-10	0.741924068	0.727069466	0.034765172	0.40741934	-0.269814568	1	0.675525708	0.553184114	0.432048	1.090823366	1.184472593	0.300755555	0.180636762	-1.473385453	0.011693205	0.597098686	0.337759317	0.508505765	0.349858121	-0.475076784	1	0.729565571	0.634985349	0.584208987	0.131989458	-1.91119839	0.003393537	0.434007458	-0.131016295	1	0.367700927	-0.372546778	1	0.33937518	-0.344849316	0.724684135
ENSBTAG00000048599	HIST1H2AG	0.002643441	-3.001607947	1.86E-07	0.036145122	0.884376588	0.027352077	0.004211163	-2.409711474	2.85E-06	0.025746353	0.280147388	0.976285803	0.008363447	-1.384488194	0.109477856	0.048523678	1.383184283	0.000176158	0.01407514	-0.077394112	1	0	-4.743326253	1.26E-05	0.031040102	0.579404938	0.289560956	0.017206137	-0.218236673	1	0.057370818	1.542200424	0.003358268	0.003599712	-2.256440863	0.024714063	0.014965774	0.417135822	1	0	-1.051011307	1	0.067875036	2.528993632	0.724684135
ENSBTAG00000010766	OIP5	0.004846309	-2.63642192	2.21E-07	0.059865359	1.291605815	1.72E-05	0.005053396	-2.592511083	6.91E-08	0.059216612	1.232283765	0.000160914	0.018519061	-0.678610923	0.911944217	0.033776285	0.239912498	1	0.02815028	0.242809303	0.986607545	0.004384387	-2.565651751	0.001341221	0.034426295	0.269332187	0.725513474	0.032500481	0.222642397	1	0.041115753	0.543157073	1	0.005999521	-2.089108307	0.02357343	0.014965774	-0.003914705	1	0.032444199	0.536529738	1	0	1.105373745	1
ENSBTAG00000037899	DLK1	0.064764314	1.929070527	2.66E-07	0.036521634	0.842418812	0.146260981	0.020213583	-0.167410186	1	0.011156753	-1.076274693	0.258835529	0.011947781	-0.927212407	0.942154317	0.019980338	-0.178878379	1	0.00703757	-0.713220695	1	0.00701502	-1.593865354	0.273874004	0.001128731	-3.886122331	5.76E-06	0.01911793	-0.12565902	1	0.004780902	-2.056555154	0.330807439	0.029997604	0.471945395	0.733616954	0.029931549	0.958017254	1	0	-1.098317022	1	0	1.478248833	1
ENSBTAG00000009097	FANCI	0.180194589	-1.761160702	2.69E-07	0.989849231	1.011642828	0.000101606	0.258144305	-1.223767416	0.000236602	0.857782656	0.724732037	0.033927888	0.391887225	-0.556312159	0.885200032	0.781136065	0.551173203	0.429811892	0.837470842	0.58652755	0.587559397	0.095579646	-2.614453034	1.21E-06	0.643376656	0.22132251	0.740254672	0.489419011	-0.198059368	1	0.781199308	0.51263306	0.869159562	0.259179299	-1.143029483	0.129138169	0.419041684	-0.391829544	1	0.302812528	-0.856537589	1	0.678750359	0.319041217	0.724684135
ENSBTAG00000015596	SLCO2B1	0.05066596	1.714599087	2.70E-07	0.028614888	0.662281599	0.285432302	0.029057026	0.677525179	0.163921711	0.0072948	-1.476651886	0.019704555	0.008960836	-1.121897899	0.431661413	0.018553171	-0.065109975	1	0.049262991	1.517525514	0.378955528	0.005261265	-1.753107273	0.098999183	0.001693096	-3.25922915	5.50E-06	0.026765102	0.549874524	0.999081768	0.001912361	-2.858615777	0.023130572	0.007199425	-1.276563828	0.322407198	0.074828872	2.17762938	1	0.010814733	0.112487425	1	0	1.685211214	1
ENSBTAG00000051898	FGF7	0.536178032	-1.692867531	3.01E-07	0.587734747	-1.577028942	2.49E-07	0.262776584	-2.758765166	2.42E-16	2.013364794	0.393476298	0.566331284	2.85910405	0.96008794	0.010554213	0.74545689	-1.185943601	0.00299968	2.252022433	0.499911745	0.623990082	2.379845493	0.626216296	0.305234882	4.5476571	1.819448365	1.76E-13	1.592523578	0.000116673	1	3.37340411	1.180138167	0.010091115	0.17878572	-3.203445422	5.03E-07	1.227193503	-0.379947886	1	1.351841642	-0.24036076	1	2.6471264	0.67674683	0.724684135
ENSBTAG00000009504	REEP4	0.25685439	-1.743434475	3.26E-07	1.76320424	1.481890544	8.56E-11	0.23582514	-1.877885247	7.76E-09	1.755901265	1.424068329	6.19E-09	0.413393231	-0.996182993	0.097890064	0.478100941	-0.791011608	0.143141526	1.37936374	0.811115238	0.461037121	0.342859096	-1.251210251	0.042530788	0.921044476	0.248135665	0.68672982	0.785746928	-0.005535696	1	0.462791267	-0.802483303	0.759824992	0.190784762	-2.090143982	0.001037964	0.703391398	-0.157459963	1	0.767846053	-0.034891641	1	1.086000574	0.453914926	0.724684135
ENSBTAG00000014328	MGC138914	0.390788755	1.310979245	3.27E-07	0.221012362	0.300914267	0.73398609	0.221086068	0.296106721	0.540895856	0.1531908	-0.306552882	0.941515967	0.141581208	-0.416411906	1	0.194570433	0.081254168	1	0.197051963	0.129020146	0.87430537	0.121009093	-0.638060117	0.576953348	0.015802234	-3.632179703	8.44E-16	0.147208062	-0.325402584	1	0.085100047	-1.153442898	0.295783158	0.166786679	-0.150749342	1	0.254418165	0.519379396	1	0.097332598	-0.796607206	1	0.135750072	0.040127721	0.724684135
ENSBTAG00000054218	IGFBP5	0.457315363	-1.69939663	3.65E-07	0.427717279	-1.823885207	3.00E-09	0.112859174	-3.76700758	7.44E-25	2.278981334	0.88279778	0.003434228	2.862090996	1.230976452	0.000128703	0.658399704	-1.139490696	0.005488539	2.512412527	0.885018464	0.423225631	3.454897289	1.489000545	1.50E-05	1.979794131	0.606347609	0.096412397	0.814423823	-0.758983842	0.988255168	3.451810895	1.4737699	0.000195073	0.10079195	-3.802250317	8.81E-09	0.6435283	-1.074014554	1	0.616439789	-1.139393568	1	0.135750072	-2.838906716	1
ENSBTAG00000017271	MASTL	0.004846309	-2.715388754	3.65E-07	0.034262564	0.176332151	1	0.001263349	-4.394234137	1.33E-12	0.059645717	1.143997676	0.001595695	0.026285119	-0.234852115	1	0.060892458	1.15970706	0.004232081	0.070375701	1.317082065	0.391100017	0.005261265	-2.418942506	0.004374368	0.043456143	0.557977633	0.293656651	0.01911793	-0.585090639	1	0.065976441	1.199176198	0.076467334	0.003599712	-2.757108434	0.006057536	0	-1.083946039	1	0.010814733	-0.546219155	1	0	1.027911771	1
ENSBTAG00000002574	MYOZ2	0.030399576	-2.099283878	3.68E-07	0.02221419	-2.588385276	1.94E-11	0.153286341	0.415199065	0.352953024	0.0072948	-4.135380528	3.55E-18	0.007766058	-3.967799941	6.40E-12	0.023310394	-2.472636215	8.04E-08	0.091488411	-0.296754549	1	0.013153162	-3.176921629	3.00E-06	0.007901117	-3.957783317	6.39E-14	0.063089169	-0.906057685	0.984104183	0.005737082	-4.242880927	2.47E-07	1.907847618	5.644388978	1.76E-104	0.059863098	-0.704947759	1	0.34607146	1.570637218	1	0.33937518	1.670577357	0.724684135
ENSBTAG00000012921	KIF24	0.014098354	-2.232213676	3.70E-07	0.104293738	0.92947363	0.004376383	0.017686885	-1.91187482	3.28E-06	0.099552564	0.821278772	0.032642477	0.045401569	-0.463855085	1	0.080397074	0.441677723	0.997975198	0.133713832	1.189511077	0.372615552	0.014906917	-2.039064823	0.004068774	0.071110051	0.234940403	0.741227604	0.086030686	0.521733529	0.970881815	0.092749489	0.64121043	0.777427415	0.032397412	-0.912600514	0.433399785	0.104760421	0.935649441	1	0.108147331	0.934076984	1	0	0.03890146	1
ENSBTAG00000013624	LMNB2	0.290778555	-1.729160909	3.89E-07	1.596786074	1.05347756	3.63E-05	0.406798366	-1.22694163	0.000130824	1.236683149	0.565503606	0.178101018	0.502404201	-0.87433106	0.22301277	1.022327286	0.236748096	1	2.174609162	1.307978754	0.252341418	0.220973126	-2.064200385	0.000119143	1.258535038	0.5723127	0.123850151	1.64414199	0.928448637	0.951640972	0.981997172	0.159843576	1	0.298776136	-1.605127076	0.015053918	1.586372089	0.838655905	1	0.638069255	-0.464674156	1	0.746625395	-0.214156423	0.724684135
ENSBTAG00000006405	PALB2	0.049784813	-1.88249874	4.60E-07	0.205951894	0.339721805	0.674417771	0.04463833	-2.051358686	9.31E-09	0.185802846	0.159870883	1	0.201320114	0.282983468	1	0.299705067	0.973998567	0.004060755	0.380028786	1.199284393	0.319496646	0.061381424	-1.499095079	0.018739019	0.237033505	0.551814555	0.153198025	0.221767989	0.414676725	0.982233875	0.325101303	1.026594606	0.063058293	0.026397892	-2.67057555	0.000156226	0.179589293	0.182273332	1	0.140591531	-0.1750693	1	0.203625108	0.589645852	0.724684135
ENSBTAG00000013745	ITGA5	0.492120675	-1.713605003	4.82E-07	0.402867507	-2.038279004	7.78E-11	0.298992588	-2.462314102	4.74E-13	1.100227479	-0.47959589	0.521093211	1.305892489	-0.198028678	1	0.523294562	-1.611573562	2.33E-05	13.3221202	3.24933825	0.000136515	1.595917022	0.114550999	1	6.883001489	2.892347279	6.57E-38	2.882983861	0.998357391	0.951640972	1.499290716	0.018343547	1	0.283177382	-2.434819182	0.00018533	2.035345321	0.449798366	1	0.811104985	-0.86814725	1	1.018125539	-0.542583926	0.724684135
ENSBTAG00000023814	ECT2	0.239672021	-1.715579773	4.83E-07	1.542191879	1.385962647	2.43E-09	0.295623657	-1.40514939	1.69E-05	1.502728795	1.290895309	2.94E-07	0.326771817	-1.217899594	0.016393444	0.621293362	-0.242943092	1	0.964147104	0.419558367	0.675519028	0.181513639	-2.055178509	0.000128949	0.75794285	0.075858703	1	0.802953065	0.156818913	1	0.610043034	-0.256931575	1	0.256779491	-1.530136712	0.022125556	0.77822027	0.112921759	1	0.454218792	-0.654493896	1	0.746625395	0.077513649	0.724684135
ENSBTAG00000014380	MCM2	0.486833792	-1.653933248	4.88E-07	1.885570539	0.502646311	0.228744297	0.58029829	-1.39444336	9.39E-06	1.684240583	0.298182068	0.81232821	1.448071086	0.044138139	1	2.421426656	0.916762859	0.005318952	2.392773835	0.766723393	0.480732423	0.475267597	-1.625126311	0.003233875	1.846039511	0.437178172	0.30844983	1.724437296	0.30046903	1	2.297701269	0.759707348	0.372117771	0.235181216	-2.630220576	2.67E-05	1.451680119	0.037559744	1	1.189620645	-0.246739935	1	1.018125539	-0.469714595	0.724684135
ENSBTAG00000015293	NXPH3	0.007049177	-2.677269248	5.63E-07	0.012048374	-1.951511957	4.08E-05	0.009685675	-2.241325113	5.11E-06	0.028750094	-0.625862864	0.613253239	0.066907575	0.728569685	0.482678655	0.029494784	-0.577302856	1	0.077413271	0.971753538	0.520171069	0.022798815	-0.905370288	0.53818692	0.176082032	2.58797958	4.84E-18	0.089854272	1.135335279	0.951640972	0.092749489	1.222171	0.07931339	0.004799617	-2.901265444	0.004733087	0.059863098	0.779214101	1	0.021629466	-0.425995557	1	0.203625108	2.567374724	0.724684135
ENSBTAG00000004926	LRR1	0.036127033	-1.858728714	5.95E-07	0.149851652	0.367469557	0.597045048	0.038742701	-1.762291918	5.93E-07	0.160914705	0.481466866	0.357064811	0.136802095	0.19985645	1	0.199803378	0.846894326	0.021947927	0.091488411	-0.310033887	1	0.042090119	-1.554561594	0.012815051	0.181161322	0.660523238	0.06350858	0.099413237	-0.266881328	1	0.225658552	0.977341502	0.087850178	0.021598275	-2.463850427	0.00046779	0.074828872	-0.45451339	1	0.140591531	0.308197804	1	0.135750072	0.65546387	0.724684135
ENSBTAG00000020059	GEN1	0.029959003	-1.93324745	6.24E-07	0.193527008	1.081995585	7.80E-05	0.018950234	-2.609348433	1.28E-11	0.148041529	0.571123135	0.211959583	0.099166584	-0.094087621	1	0.15936698	0.688497619	0.167373476	0.274465234	1.419293677	0.252321776	0.015783795	-2.744049227	1.20E-05	0.139962641	0.457534974	0.299410576	0.118531167	0.189372402	1	0.150120308	0.548338831	0.878947384	0.010799137	-3.199995716	2.81E-05	0.059863098	-0.523109436	1	0.021629466	-1.726217878	1	0.067875036	0.264668609	0.753294898
ENSBTAG00000010820	WNT11	0.004846309	-2.727730104	6.36E-07	0.007906745	-2.088682141	1.65E-05	0.009264559	-1.836026038	0.000189767	0.008153012	-2.014228297	0.000143086	0.016726894	-0.922879986	0.617282022	0.007135835	-2.177785362	0.000285687	0.204089533	2.799608273	0.03249991	0.01403004	-1.126493237	0.331104386	0.212201423	4.047807517	1.23E-51	0.059265583	0.995624891	0.951640972	0.021992147	-0.479139462	1	0.007199425	-1.954635734	0.058491378	0	-1.096059419	1	0	-1.560767463	1	0	1.015798391	1
ENSBTAG00000002127	TCP11L2	0.051987681	1.560173331	6.62E-07	0.010542327	-1.117618098	0.038545626	0.026530328	0.346812634	0.632968742	0.008153012	-1.469803956	0.00838227	0.015532116	-0.478485684	1	0.009514447	-1.227472486	0.09482917	0.035187851	0.946970437	0.618609433	0.058750791	1.61129888	0.000232413	0.003950558	-2.392154363	6.73E-05	0.017206137	-0.204127074	1	0.008605623	-1.243640707	0.572302389	0.045596358	1.170622505	0.043173993	0.029931549	1.019417799	1	0.043258933	1.298661779	1	0	1.539360347	1
ENSBTAG00000011059	CDKN2C	0.210594165	-1.698303412	6.64E-07	1.246630203	1.239983585	2.53E-07	0.199609136	-1.785091273	3.84E-08	1.32722449	1.322778462	1.27E-07	0.348277823	-0.909670403	0.179465115	0.66172976	0.085368512	1	0.492629907	-0.342347399	1	0.204312454	-1.675893268	0.002547148	0.566058584	-0.163823941	0.91042216	0.866042234	0.479530342	0.960297367	0.559365477	-0.175125347	1	0.189584858	-1.766031306	0.006477798	0.688425623	0.142524186	1	0.767846053	0.296183547	1	0.475125251	-0.304922932	0.724684135
ENSBTAG00000011083	POLD1	0.145389277	-1.731874834	6.64E-07	0.529375435	0.300745995	0.761470637	0.13391499	-1.861467458	1.95E-08	0.584871316	0.464135325	0.397829401	0.476716471	0.114576213	1	0.822048185	1.050828676	0.000757735	1.35825103	1.633688106	0.163866172	0.1324085	-1.799701163	0.001341221	0.578474625	0.428636691	0.334707072	0.311622261	-0.516078285	1	0.794585832	0.908559328	0.11733987	0.109191279	-2.057917377	0.001602097	0.299315488	-0.520886089	1	0.291997795	-0.569358027	1	0.271500144	-0.482153547	0.725739773
ENSBTAG00000030897	XRCC2	0.024231546	-1.990237755	6.83E-07	0.134414673	0.719036004	0.041584631	0.027372561	-1.818577949	1.60E-06	0.145466894	0.842324342	0.015294899	0.087816192	-0.015572478	1	0.143668143	0.805657468	0.059443723	0.098525981	0.234216692	0.858752759	0.041213242	-1.133242639	0.158410867	0.093684671	0.086306381	0.963092178	0.065000962	-0.428326886	1	0.134821423	0.648510073	0.689079126	0.016798658	-2.363323117	0.001940055	0.089794647	0.210783324	1	0.064888399	-0.25392472	1	0.271500144	1.835510001	0.724684135
ENSBTAG00000007121	TK1	0.362151473	-1.676057159	7.33E-07	1.244371133	0.267208844	0.83678219	0.408482831	-1.500629043	1.75E-06	1.319071478	0.360115449	0.662531072	1.170882561	0.153115751	1	1.710221774	0.798682767	0.031621841	0.809320562	-0.393932692	1	0.462991312	-1.248962913	0.040324745	1.564985498	0.628962755	0.07477274	1.191047046	0.168194613	1	1.995548293	0.983063406	0.075024622	0.224382078	-2.289694719	0.000263388	1.137398856	0.095019929	1	1.13554698	0.093521876	1	1.49325079	0.459795297	0.724684135
ENSBTAG00000025942	HPGD	0.000440574	-3.967224953	7.47E-07	0.000376512	-4.227435293	3.39E-08	0.002526698	-2.202487033	0.000432615	0.001287318	-2.997940642	2.76E-05	0.001194778	-2.886570423	0.002401418	0.001902889	-2.501395208	0.001695537	0.00703757	0.193253478	1	0.001753755	-2.289608285	0.040502644	0.113437463	5.987817842	6.26E-82	0.013382551	0.329048624	1	0	-3.754664812	0.014212516	0.002399808	-1.81306484	0.169505593	0	0.26996126	1	0.010814733	0.811485169	1	0	2.38181907	1
ENSBTAG00000004021	CDK2	0.12468232	-1.694499642	1.01E-06	0.349402848	-0.100879133	1	0.088434427	-2.212766955	3.61E-11	0.427818563	0.235727959	0.960182537	0.482690362	0.421314856	0.886226336	0.688370211	1.052031719	0.000690918	0.436329346	0.247289534	0.787945324	0.179759884	-1.08783435	0.1079041	0.585811376	0.746122742	0.025045051	0.365152465	-0.020400533	1	0.770681325	1.146642252	0.011440795	0.046796262	-3.01032855	4.34E-06	0.344212812	-0.070093453	1	0.324441994	-0.164134106	1	0.203625108	-0.547286259	0.740531051
ENSBTAG00000017026	DEPDC1B	0.004846309	-2.513506986	1.08E-06	0.046310938	0.95645824	0.007161477	0.002947814	-3.18401643	1.32E-09	0.066940517	1.640028868	2.86E-08	0.015532116	-0.810734585	0.716271865	0.034252008	0.401729744	1	0.063338131	1.378245928	0.368665255	0.005261265	-2.218905294	0.006710441	0.029347005	0.150636219	0.931046979	0.021029723	-0.255201258	1	0.03059777	0.225869365	1	0.005999521	-1.967574789	0.039310408	0.044897323	1.122317706	1	0.032444199	0.657609662	1	0	1.225779595	1
ENSBTAG00000015595	MCM5	0.771884891	-1.602217448	1.10E-06	2.719167419	0.396552716	0.48682281	0.839284827	-1.481691496	2.15E-06	2.536873968	0.269987976	0.877166408	2.589681583	0.291827731	1	3.880467041	0.997854244	0.001338366	3.589160752	0.734945609	0.495549922	0.694486968	-1.69507073	0.001837492	2.756925408	0.395734841	0.37544471	1.357373038	-0.683566704	1	3.979622423	0.955664538	0.090785498	0.381569524	-2.549176795	4.21E-05	0.972775337	-1.150647995	1	2.217020294	0.03168628	1	2.443501292	0.125248731	0.724684135
ENSBTAG00000004906	CCNE2	0.042735636	-1.798828636	1.44E-06	0.115589089	-0.281327219	0.926022637	0.046322795	-1.685842015	1.78E-06	0.103843623	-0.446420735	0.670685633	0.169658494	0.342041947	1	0.331578464	1.551262932	9.08E-09	0.147788972	0.163471374	0.868820194	0.042966997	-1.71053	0.005179725	0.182854418	0.466336835	0.264010568	0.149119855	0.13770276	1	0.277292288	1.105176525	0.027969189	0.10679147	-0.363323117	0.945913402	0.104760421	-0.220785899	1	0.151406264	0.225274123	1	0.33937518	1.474928475	0.724684135
ENSBTAG00000012100	PDE1A	0.000440574	-3.922830834	1.45E-06	0.001506047	-2.841660716	1.41E-05	0.002105582	-2.386060206	0.000213067	0	-4.972518045	8.60E-08	0.000597389	-3.433397795	0.000544505	0.001902889	-2.456407754	0.002303821	0.02815028	1.579028055	0.455436879	0.004384387	-1.225477948	0.376995875	0.10384325	5.457632126	1.76E-70	0.024853309	1.222264283	0.951640972	0.001912361	-2.112621217	0.235617347	0.001199904	-2.359892212	0.067865625	0	0.314161064	1	0	-0.15054698	1	0	2.426018874	1
ENSBTAG00000006039	ARHGDIB	0.003524589	-2.967918724	1.58E-06	0.003012094	-3.228129063	2.46E-08	0.002105582	-3.635367628	8.04E-09	0.007723906	-1.905162777	0.001524907	0.005973891	-2.183419542	0.00839628	0.003330056	-3.015572851	1.36E-05	0.01407514	-0.408953969	1	0.007891897	-1.726743368	0.117595822	0.235904774	5.21324939	1.30E-72	0.055441997	1.086824406	0.951640972	0.006693262	-1.92182338	0.227451802	0.002399808	-3.006493779	0.01069696	0.044897323	1.091768643	1	0.010814733	-0.378424941	1	0	1.195405946	1
ENSBTAG00000031769	H2B	0.004846309	-2.659796428	1.59E-06	0.033133029	0.184167801	1	0.011791257	-1.416490386	0.004516156	0.044627012	0.688229924	0.222182999	0.019713839	-0.610042394	1	0.058038124	1.141509581	0.008329221	0	-2.112344416	0.890361079	0.005261265	-2.36383287	0.007863493	0.038376853	0.417912537	0.525727558	0.066912755	1.246665627	0.951640972	0.050677556	0.841395397	0.587281003	0.01439885	-0.978802045	0.495438495	0.119726195	2.160876145	1	0	-1.494112725	1	0.135750072	2.672477724	0.724684135
ENSBTAG00000013138	TDP1	0.043616783	-1.79411126	1.62E-06	0.22289492	0.822181573	0.006284248	0.04463833	-1.766738816	5.87E-07	0.259609058	1.079514451	0.000142317	0.106335253	-0.419514495	1	0.185055986	0.467785034	0.752878146	0.239277383	0.815634336	0.502414306	0.050858894	-1.491842932	0.018785388	0.156893606	0.189966284	0.769232096	0.126178339	-0.132043758	1	0.196016962	0.528309401	0.897512957	0.035997125	-1.959188064	0.005414127	0.104760421	-0.245466705	1	0.108147331	-0.249110815	1	0.135750072	0.448637177	0.724684135
ENSBTAG00000000629	MMS22L	0.01850409	-2.008883278	1.63E-06	0.068148616	-0.021443643	1	0.015581304	-2.267040934	1.95E-08	0.076380847	0.167731988	1	0.092595305	0.473245107	0.904334002	0.136532309	1.166867173	0.000493039	0.253352524	1.928026398	0.133652822	0.023675692	-1.558232373	0.030659808	0.090862844	0.444987822	0.352482116	0.070736341	0.065451874	1	0.152988849	1.254323971	0.013895481	0.009599233	-2.740164293	0.000732009	0.089794647	0.575547617	1	0.032444199	-0.699805419	1	0.067875036	0.874571216	0.724684135
ENSBTAG00000033267	LIN9	0.041413915	-1.805951822	1.67E-06	0.211976081	0.809668791	0.008448421	0.047586144	-1.605886431	6.67E-06	0.220989529	0.863805715	0.007178163	0.124256925	-0.110359887	1	0.192667543	0.610159863	0.297502484	0.161864112	0.328468825	0.773629157	0.047351384	-1.531388189	0.016149405	0.136012083	0.03148911	1	0.05735379	-1.200463375	0.951640972	0.234264174	0.87715857	0.205076073	0.039596837	-1.760843383	0.014853297	0.044897323	-1.1849407	1	0.151406264	0.263493445	1	0.33937518	1.513014251	0.724684135
ENSBTAG00000007638	PIF1	0.003084015	-3.101317849	1.89E-06	0.075302338	1.980744691	1.09E-09	0.00463228	-2.579115082	1.27E-05	0.061791247	1.489790776	9.21E-05	0.008363447	-1.684936562	0.096410661	0.008563002	-1.696702086	0.029200491	0.077413271	1.655550431	0.316691832	0.006138142	-2.014922672	0.07042144	0.033297564	0.360970531	0.659981987	0.030588688	0.270290725	1	0.013386524	-0.955577506	1	0.005999521	-1.959096635	0.128925212	0.029931549	0.712904756	1	0.043258933	0.990808869	1	0.067875036	2.23698505	0.724684135
ENSBTAG00000037775	ENSBTAG00000037775	0.259497831	-1.618695263	2.21E-06	1.336239985	1.070849401	2.39E-05	0.379004689	-1.048140831	0.001962873	1.535340842	1.303557093	2.07E-07	0.484482529	-0.644359553	0.669957339	0.438615988	-0.811676946	0.11947131	0.619306169	-0.240087934	1	0.254294471	-1.583880538	0.004737275	1.119701128	0.689783674	0.042900927	0.382358602	-0.955254658	0.954409037	0.730521752	-0.006164561	1	0.262779012	-1.518321575	0.023130131	0.26938394	-1.392211148	1	0.540736657	-0.429108392	1	0.407250215	-0.722166335	0.731812052
ENSBTAG00000036016	FAM111B	0.106618803	-1.667915732	2.25E-06	0.280501208	-0.176672871	1	0.087592195	-1.968133169	4.49E-09	0.314534611	0.01355486	1	0.442665295	0.564104512	0.482678655	0.643652312	1.247986018	1.49E-05	0.450404487	0.545769893	0.617030748	0.166606722	-0.942001413	0.220301816	0.393362745	0.373608822	0.392865879	0.313534054	0.012298252	1	0.6941869	1.259846508	0.003440445	0.047996166	-2.722462291	3.76E-05	0.344212812	0.181279618	1	0.129776798	-1.170628953	1	0.33937518	0.288758249	0.724684135
ENSBTAG00000013669	KIF22	0.422069478	-1.566540877	2.28E-06	2.348303405	1.292980348	4.25E-08	0.394164876	-1.675722057	9.35E-08	2.281985075	1.197916967	3.35E-06	0.626063737	-0.941492509	0.099812755	1.163616818	0.016066679	1	1.484927292	0.365987238	0.7017488	0.28586206	-2.075211834	9.27E-05	1.217900723	0.08848717	0.981371492	0.81251203	-0.515113396	1	1.057535416	-0.130481002	1	0.719942497	-0.702182977	0.503129976	0.763254496	-0.589140941	1	1.070658581	-0.10726451	1	0.950250503	-0.273269517	0.724684135
ENSBTAG00000015656	WSCD1	0.103534788	1.351425369	2.35E-06	0.054594195	0.219813704	0.953559239	0.034110422	-0.541194801	0.334078097	0.0510636	0.106102049	1	0.047791125	0.003000697	1	0.046620788	-0.040556769	1	0.02111271	-0.792625413	1	0.055243282	0.231138655	0.937254704	0.005643655	-3.083314199	3.93E-09	0.065000962	0.484210273	0.979349477	0.020079786	-1.246216374	0.369497301	0.016798658	-1.465825657	0.090829295	0.164623519	1.887946016	1	0.032444199	-0.174393722	1	0	0.397449722	1
ENSBTAG00000004706	SUV39H1	0.051106534	-1.756369688	2.42E-06	0.230801665	0.644425444	0.068096187	0.059377401	-1.53876508	1.28E-05	0.277631505	0.959526028	0.001342773	0.137996873	-0.221332511	1	0.203609157	0.406225681	0.963979062	0.281502804	0.854214237	0.477160574	0.052612649	-1.63701735	0.00802288	0.191884266	0.301361041	0.562537323	0.267651022	0.783033535	0.951640972	0.1893237	0.269790368	1	0.064794825	-1.312758236	0.090829295	0.179589293	0.26661671	1	0.108147331	-0.440053598	1	0.271500144	0.996150024	0.724684135
ENSBTAG00000027444	SVIL	0.025553267	-1.95819912	2.64E-06	0.039910239	-1.318091134	0.000878425	0.1212815	0.470548636	0.262820654	0.026604565	-1.903410543	4.81E-06	0.026285119	-1.871437119	0.000686186	0.036630619	-1.414114883	0.004742025	0.415216636	2.227379262	0.072974503	0.038582609	-1.274474982	0.110102087	0.111744367	0.319585176	0.579230472	0.084118892	-0.102564431	1	0.025816868	-1.840872954	0.035637454	0.877129943	3.968809111	7.72E-42	0.119726195	0.530510403	1	0.032444199	-1.108255259	1	0.067875036	0.466660859	0.72702295
ENSBTAG00000037640	PID1	0.010573766	-2.144045064	2.69E-06	0.007530234	-2.662848928	7.56E-10	0.009685675	-2.27889276	1.81E-07	0.010727647	-2.128953385	2.72E-06	0.007766058	-2.51043147	2.58E-05	0.007135835	-2.678683598	3.39E-07	0.056300561	0.514487803	0.768408148	0.021921937	-0.999297266	0.329669344	0.349906602	4.780892415	3.96E-90	0.074559927	0.819099478	0.951640972	0.011474164	-1.889731057	0.054723739	0.002399808	-3.678381223	0.000107397	0.059863098	0.742511218	1	0.097332598	1.286457639	1	0	0.525554548	1
ENSBTAG00000009387	MYOM2	0.005286883	-3.103286503	2.69E-06	0.011671862	-2.03032228	0.000583439	0.024424747	-0.912499462	0.217258339	0.003861953	-3.530295716	1.79E-07	0.005376502	-2.997601735	0.000625396	0.009038724	-2.344462227	0.001550397	0.337803365	3.035830874	0.042813275	0.002630632	-3.732984308	0.000959625	0.005079289	-3.087756193	2.71E-05	0.036324067	-0.211199122	1	0.00095618	-4.604042949	0.001072384	0.727141922	5.841266375	2.95E-60	0.119726195	1.602638965	1	0.043258933	0.28298962	1	0	0.530716253	1
ENSBTAG00000008419	PDE2A	0.009692618	-2.49428907	2.82E-06	0.007906745	-2.820136478	1.33E-08	0.040848283	-0.359587994	0.758179758	0.0072948	-2.898704936	8.60E-08	0.010753003	-2.28650798	0.001202644	0.011417336	-2.245934022	0.000176158	0.197051963	2.009681984	0.175466147	0.00350751	-3.636411049	7.56E-05	0.007336751	-2.824721787	3.08E-06	0.051618411	0.055366974	1	0.007649442	-2.650086301	0.015055422	0.817134735	5.641922119	2.27E-74	0.209520842	2.120447719	1	0.043258933	0.055903897	1	0	0.304635016	1
ENSBTAG00000012142	RAD18	0.094282743	-1.660467293	2.97E-06	0.324553076	0.283782835	0.770758493	0.053060656	-2.51923865	4.58E-13	0.436829787	0.792884567	0.016878047	0.304071033	0.162517315	1	0.356791747	0.431987024	0.823264573	0.563005608	1.053655645	0.357760914	0.099087156	-1.518118816	0.010661418	0.501156553	0.994701817	0.000712204	0.221767989	-0.307887983	1	0.465659808	0.821557135	0.23036206	0.040796742	-2.767272713	3.43E-05	0.224486616	-0.221338973	1	0.17303573	-0.598307666	1	0.271500144	0.209408806	0.724684135
ENSBTAG00000021069	PBK	0.365676061	-1.592242827	2.99E-06	2.111101041	1.332960743	1.22E-08	0.262776584	-2.093395441	1.20E-10	2.243794652	1.410041618	7.71E-09	0.765255388	-0.441733389	1	0.959056216	-0.092339319	1	0.830433272	-0.290125073	1	0.29287708	-1.854699314	0.000588723	0.835260922	-0.307720308	0.650934245	1.062956914	0.067684371	1	0.906458928	-0.172661096	1	0.14998802	-2.804677055	8.93E-06	0.868014917	-0.223857935	1	1.146361713	0.173855142	1	1.357500718	0.394832825	0.724684135
ENSBTAG00000009211	UBE2S	2.991494524	-1.53543764	2.99E-06	15.76830954	1.227510372	2.35E-07	4.032609886	-1.08575748	0.000722429	14.53124155	1.036728755	0.00012587	4.538364704	-0.875977701	0.15298208	5.950334896	-0.471231158	0.911479708	5.017787483	-0.683670691	1	2.946308348	-1.497420908	0.004052247	12.19029454	0.688259715	0.039759105	7.23804834	-0.14920926	1	6.004812305	-0.434327843	1	3.452124275	-1.249376772	0.045960996	5.896515123	-0.457837997	1	8.705860178	0.11029343	1	8.755879631	0.048161877	0.724684135
ENSBTAG00000030913	MX1	3.572170487	1.193930469	3.24E-06	2.276766184	0.401308067	0.47289072	2.815583719	0.765256586	0.006491123	1.178753855	-0.679282626	0.13817291	1.081871591	-0.789584257	0.271235668	1.841045415	0.03565679	1	1.590490843	-0.18411273	1	1.060144879	-0.801699319	0.264536797	0.218409444	-3.165111901	9.04E-16	1.091633809	-0.738273446	0.98949521	0.446536202	-2.071737495	0.000824453	2.34941235	0.403001643	0.636791588	1.242159277	-0.541449026	1	0.951696516	-0.922530127	1	1.629000862	-0.180539165	0.724684135
ENSBTAG00000008271	MEDAG	0.049784813	-1.765897853	3.24E-06	0.078690943	-1.095547662	0.00362928	0.027793677	-2.63037724	2.20E-12	0.090112235	-0.871223106	0.067422841	0.082439691	-0.977760674	0.190807043	0.066125404	-1.331300708	0.003385244	0.260390094	0.77182039	0.519915017	0.059627669	-1.426367832	0.030394081	0.958292598	3.694600686	3.49E-62	0.294416124	0.956451948	0.951640972	0.071713523	-1.151090884	0.353263687	0.021598275	-2.835016114	8.54E-05	0.239452391	0.684023636	1	0.302812528	0.995694397	1	0.407250215	1.510907772	0.724684135
ENSBTAG00000012514	PODN	0.040532768	1.67549005	3.30E-06	0.006400699	-1.38567034	0.026264593	0.006737861	-1.287075494	0.034051478	0.009869435	-0.723521472	0.590215678	0.014337337	-0.126844926	1	0.009514447	-0.763022793	0.952126552	0.02815028	1.123756631	0.605628677	0.056120159	2.068474575	4.05E-06	0.01128731	-0.488786834	0.661460403	0.022941516	0.638698389	0.994129097	0.004780902	-1.550126056	0.525457722	0.007199425	-0.978802045	0.572617301	0	-0.13415259	1	0.032444199	1.415306697	1	0	1.97770522	1
ENSBTAG00000004411	CRISPLD1	0.052428255	-1.779389754	3.37E-06	0.099775598	-0.820249703	0.062926547	0.042953865	-2.082006857	1.20E-08	0.148041529	-0.183540245	1	0.136204706	-0.30500044	1	0.150328256	-0.156307196	1	0.66856916	2.047823039	0.090294745	0.081549606	-1.057574651	0.18497015	0.650149042	2.482717619	1.38E-23	0.193091094	0.23593922	1	0.285897911	0.849326916	0.254375951	0.027597796	-2.583204426	0.000358061	0.119726195	-0.324642198	1	0.129776798	-0.257004113	1	0.135750072	0.199510344	0.724684135
ENSBTAG00000005247	FRMD3	0.285932245	1.227411802	3.82E-06	0.111823972	-0.386538167	0.716457509	0.169709877	0.303641563	0.530388482	0.120149647	-0.264505587	1	0.108724809	-0.407832535	1	0.127017862	-0.172271612	1	0.161864112	0.24410262	0.824757705	0.136792888	-0.046775733	1	0.067723859	-1.12993015	0.008033753	0.110883995	-0.341395721	1	0.040159573	-1.846001575	0.011272732	0.241180737	0.819116431	0.10525476	0.089794647	-0.459701337	1	0.129776798	-0.028106677	1	0.135750072	0.42762276	0.724684135
ENSBTAG00000052609	H4	0.05066596	-1.690036817	3.85E-06	0.187126309	0.366357983	0.58476066	0.055166238	-1.569435162	5.67E-06	0.230858964	0.72249539	0.038011547	0.097971806	-0.666457141	0.685157247	0.309695236	1.236761348	1.97E-05	0.056300561	-1.272410094	1	0.052612649	-1.55931116	0.010604487	0.169874012	0.190170861	0.766855071	0.112795788	-0.411759036	1	0.28494173	0.993603431	0.069965051	0.047996166	-1.666152419	0.017779013	0.044897323	-1.361905705	1	0.129776798	-0.12165226	1	0.067875036	-0.251050811	0.820680438
ENSBTAG00000020907	PSMC3IP	0.099129053	-1.62761328	3.91E-06	0.293302606	0.063285335	1	0.085907729	-1.848362143	3.07E-08	0.27505687	-0.043283044	1	0.37575772	0.45854246	0.812189085	0.589419966	1.269231011	9.68E-06	0.281502804	0.019390264	0.938802994	0.094702768	-1.625578266	0.004871467	0.419323557	0.64336335	0.059722883	0.258092057	-0.126984418	1	0.525899167	0.970819952	0.072516501	0.045596358	-2.650839364	5.74E-05	0.314281263	0.199087454	1	0.259553595	-0.080388465	1	0.33937518	0.43217681	0.724684135
ENSBTAG00000011541	RBL1	0.04317621	-1.722133484	3.97E-06	0.174701424	0.486810225	0.295301506	0.048849493	-1.54450571	1.19E-05	0.188377482	0.606511022	0.138777745	0.138594262	0.08459124	1	0.211696437	0.798540544	0.042926792	0.211127103	0.723074425	0.547573419	0.077165219	-0.795330454	0.39762273	0.136012083	0.054825014	1	0.135737304	0.060680774	1	0.226614732	0.847751977	0.23036206	0.044396454	-1.576656301	0.03035618	0.029931549	-1.579416877	1	0.064888399	-0.819429714	1	0.203625108	0.948053785	0.724684135
ENSBTAG00000050209	ENSBTAG00000050209	0.011014339	-2.15650318	4.19E-06	0.068148616	0.680897277	0.119359722	0.008422326	-2.547214997	2.31E-08	0.075522635	0.847389249	0.035883259	0.033453787	-0.481403167	1	0.088484353	1.115592003	0.003449299	0.02815028	-0.409502418	1	0.009645652	-2.208989825	0.003707735	0.050228528	0.146299146	0.898741909	0.045883032	0.043534611	1	0.088924768	1.035853215	0.158965483	0.007199425	-2.518321575	0.004827777	0.074828872	0.938117697	1	0.032444199	-0.114842919	1	0.067875036	1.458440352	0.724684135
ENSBTAG00000054051	ENSBTAG00000054051	0.001321721	-3.41468393	4.29E-06	0.009789304	-0.810623308	0.421697978	0.033689306	1.255369247	0.001713294	0	-5.471619809	4.56E-09	0.000597389	-3.934381903	0.000105689	0.002378612	-2.695489635	0.00065285	0.154826542	3.35911111	0.012942365	0	-4.34196369	0.00078847	0.001128731	-3.435015577	2.98E-05	0.005735379	-1.156378203	0.986677003	0	-4.209566773	0.006063578	0.209983228	4.747022992	1.51E-38	0	-0.1849407	1	0	-0.649648744	1	0	1.92691711	1
ENSBTAG00000019585	MYOM1	0.016301222	-2.133163445	4.33E-06	0.023720236	-1.610503682	0.00017581	0.07327424	0.166151096	0.878697196	0.0072948	-3.277677926	3.91E-11	0.007766058	-3.112159599	5.19E-07	0.017126004	-2.047766464	9.09E-05	0.309653085	2.279467773	0.087613183	0.008768775	-2.866565323	0.000176634	0.015237868	-2.186129808	2.38E-05	0.045883032	-0.494084765	1	0.009561803	-2.734168406	0.002641533	0.958723426	5.217874787	4.34E-74	0.089794647	0.633800983	1	0.043258933	-0.318618442	1	0.203625108	1.934878396	0.724684135
ENSBTAG00000013242	MYMK	0.106618803	-1.705870439	4.42E-06	0.070784198	-2.341897938	7.71E-12	0.50702405	0.78894575	0.009705837	0.018022447	-4.296145059	2.92E-24	0.014934727	-4.493321612	8.77E-18	0.06327107	-2.46616672	1.98E-09	0.893771403	1.501728981	0.212787641	0.01052253	-4.899445454	4.14E-13	0.021445889	-3.995420974	8.67E-18	0.233238747	-0.459137201	1	0.007649442	-5.298511459	2.68E-12	4.700024604	5.293913911	8.16E-102	0.26938394	-0.193511191	1	0.118962065	-1.322844836	1	0.543000287	0.837972423	0.724684135
ENSBTAG00000039462	PCLAF	0.661300925	-1.514182606	4.51E-06	2.953734201	0.933040336	0.000421637	1.009836937	-0.871385499	0.00945125	2.571631545	0.659777984	0.066834601	1.23540058	-0.536647568	0.848029366	2.374805868	0.512310868	0.533963274	0.971184674	-0.848200783	1	0.320060282	-2.515580597	1.59E-06	2.255768855	0.415876547	0.33783649	1.793261845	0.041023314	1	2.216425943	0.368919116	1	0.383969332	-2.23028437	0.000343887	1.481611668	-0.242047607	1	2.011540364	0.200081427	1	1.629000862	-0.133456623	0.724684135
ENSBTAG00000012296	GABRG1	0.039211048	1.562595993	4.62E-06	0.016943026	0.076413342	1	0.0206347	0.404344647	0.5885403	0.012873176	-0.354287663	0.980272477	0.008960836	-0.850044547	0.814737524	0.018553171	0.228206997	1	0.01407514	0.344562802	1	0.01052253	-0.567045756	0.850494202	0.002821827	-2.402697857	0.000282958	0.028676895	0.918828141	0.954409037	0.003824721	-1.850880128	0.219813541	0.007199425	-1.011968909	0.492618987	0.014965774	0.837923409	1	0.010814733	0.373215364	1	0	1.945179317	1
ENSBTAG00000019984	GINS1	0.333954764	-1.559445903	4.78E-06	1.026370865	0.208482906	0.949408566	0.289306912	-1.781511463	3.10E-08	1.112671549	0.340170265	0.710613833	1.083066369	0.282196655	1	1.392439258	0.7164029	0.0874062	0.767095141	-0.241156159	1	0.462991312	-1.013830298	0.140837268	1.463964075	0.783364094	0.014413758	1.018985675	0.172082992	1	1.66949081	0.951024084	0.097673533	0.137988979	-2.761570425	1.20E-05	0.793186044	-0.189386605	1	0.843549185	-0.103105985	1	1.15387561	0.334496639	0.724684135
ENSBTAG00000026139	ARMCX1	0.215881048	1.256147227	4.86E-06	0.073419779	-0.585139617	0.341770904	0.080433217	-0.432043196	0.467119849	0.0802428	-0.434663209	0.731121184	0.125451703	0.282879011	1	0.093241577	-0.19174871	1	0.182976823	0.847148775	0.494759275	0.199051189	1.005337478	0.024210428	0.047406701	-1.216699478	0.005987735	0.074559927	-0.478489485	1	0.068844982	-0.625722496	1	0.0863931	-0.281575968	1	0.104760421	0.161436804	1	0.097332598	0.020099549	1	0.135750072	0.854656676	0.724684135
ENSBTAG00000013921	CKM	0.005286883	-3.040745037	4.86E-06	0.007153722	-2.666626654	8.34E-06	0.014739071	-1.602820759	0.008760811	0.003003741	-3.793547904	5.48E-08	0.002986945	-3.679516286	4.56E-05	0.009514447	-2.209140664	0.003754599	0.063338131	0.735753559	0.626576078	0.005261265	-2.858350433	0.010626286	0.003386193	-3.545467028	4.46E-06	0.003823586	-2.916063873	0.951640972	0.005737082	-2.725953516	0.067797117	0.794336556	6.691044753	5.67E-80	0.044897323	0.485890563	1	0.054073666	0.609760798	1	0.271500144	2.921483224	0.724684135
ENSBTAG00000003314	SKA3	0.23218227	-1.565437396	5.14E-06	1.22140392	1.181262942	1.34E-06	0.262355468	-1.386564556	2.24E-05	1.069760961	0.900602805	0.002275767	0.400848061	-0.709965356	0.507014215	0.725952275	0.222326939	1	0.513742617	-0.295569372	1	0.141177275	-2.228631911	2.95E-05	0.792369145	0.359831313	0.457437734	0.825894581	0.39486944	0.980007147	0.676975655	0.101409789	1	0.133189362	-2.29062955	0.000301531	0.50883633	-0.297483479	1	0.497477724	-0.335446233	1	0.882375467	0.489930638	0.724684135
ENSBTAG00000001333	PPARG	0.018063516	-1.975823922	5.18E-06	0.012424886	-2.550318255	3.60E-10	0.011791257	-2.599639082	1.09E-09	0.046343435	-0.561729326	0.55797698	0.035843344	-0.925325971	0.388142209	0.009514447	-2.875403267	8.96E-09	0.133713832	1.088481156	0.410674907	0.061381424	-0.097291313	1	0.429482136	3.891665573	2.37E-60	0.107060409	0.740902399	0.951640972	0.046852835	-0.496001611	1	0.01439885	-2.138655333	0.009440061	0	-2.172410305	1	0.021629466	-1.049865856	1	0.067875036	0.940592047	0.724684135
ENSBTAG00000018267	TRIM54	0.004405736	-2.613146335	5.57E-06	0.004894652	-2.516698561	1.34E-06	0.005895628	-2.228216234	2.29E-05	0.003432847	-2.951707858	4.64E-07	0.007168669	-1.876887869	0.01995171	0.007135835	-1.932947795	0.002810562	0.02111271	0.067722596	1	0.005261265	-2.190392606	0.019909961	0.002257462	-3.368683825	8.92E-07	0.009558965	-1.243751238	0.968484537	0.008605623	-1.534757655	0.40108332	0.476361952	6.302727617	2.66E-92	0.059863098	1.475455761	1	0.054073666	1.276653158	1	0.067875036	2.256806491	0.724684135
ENSBTAG00000004931	POLE2	0.022909826	-1.798006809	5.72E-06	0.086597688	0.267828432	0.865105814	0.015581304	-2.368000234	9.93E-10	0.096977929	0.454707414	0.463477395	0.106932642	0.596683545	0.502571794	0.130823641	0.965806325	0.006324957	0.063338131	-0.088396606	1	0.023675692	-1.658437355	0.011684205	0.110615636	0.656741037	0.079791983	0.042059446	-0.775514933	0.994129097	0.131952882	0.905975724	0.193828246	0.010799137	-2.685936415	0.000423003	0.044897323	-0.333537192	1	0.086517865	0.376804797	1	0.067875036	0.776275692	0.725701688
ENSBTAG00000008436	CDC25B	0.245840051	-1.565964205	5.88E-06	1.327203704	1.232113233	3.51E-07	0.184870065	-1.999474961	1.06E-09	1.389444843	1.282519928	4.30E-07	0.470742581	-0.55194605	0.904234446	0.574672574	-0.249185368	1	1.104898506	0.725016064	0.509746507	0.27533953	-1.335583714	0.026329694	0.64168356	-0.071087706	1	0.975014436	0.557161668	0.954409037	0.650202606	-0.047892256	1	0.143988499	-2.261663837	0.000397247	0.853049142	0.350771982	1	0.400145126	-0.726255617	1	0.746625395	0.184404641	0.724684135
ENSBTAG00000014793	C16H1orf112	0.010133192	-2.036324965	6.04E-06	0.059865359	0.739227523	0.052720443	0.013054606	-1.679510953	6.48E-05	0.050205388	0.417844506	0.654656096	0.042414623	0.136614365	1	0.068504015	0.946301817	0.021335673	0.077413271	1.100534466	0.44196618	0.009645652	-1.973548788	0.007144854	0.050228528	0.407149305	0.450704685	0.024853309	-0.575336071	1	0.069801162	0.909757525	0.284489716	0.004799617	-2.773641015	0.001421183	0.014965774	-0.420879653	1	0.021629466	-0.298697748	1	0	0.68905328	1
ENSBTAG00000049560	ENSBTAG00000049560	0.022028678	2.04915479	6.09E-06	0.006024187	-0.254007695	1	0.007158977	0.026065698	1	0.004720165	-0.596142166	0.918857628	0.004779112	-0.511400307	1	0.006660113	-0.07222738	1	0.02111271	1.936478063	0.446150341	0.00701502	0.085561831	1	0	-3.855748682	0.001040027	0.011470758	0.873369141	0.984104183	0.002868541	-1.005208274	1	0.003599712	-0.661061747	0.917471605	0	0.988390903	1	0.010814733	1.533951194	1	0	3.100248713	1
ENSBTAG00000047807	SAPCD2	0.02599384	-1.902072274	6.26E-06	0.216870733	1.643189226	1.49E-10	0.021476932	-2.189662993	5.34E-08	0.202967082	1.451556937	2.38E-07	0.040622456	-1.203143255	0.087615306	0.05518379	-0.763022793	0.471676301	0.295577944	1.763045544	0.179733187	0.014906917	-2.588776477	0.00015367	0.049099797	-0.925650696	0.076763309	0.193091094	1.158830294	0.951640972	0.068844982	-0.388976023	1	0.023998083	-1.887289425	0.021262569	0.254418165	1.568246513	1	0.140591531	0.737573811	1	0.135750072	1.08245313	0.724684135
ENSBTAG00000007749	TONSL	0.034364738	-1.783238718	6.35E-06	0.119730717	0.153823803	1	0.021055816	-2.508759497	1.03E-10	0.156623647	0.607931603	0.171054352	0.125451703	0.221612204	1	0.205036324	1.071838711	0.001427438	0.358916075	1.754629159	0.161532116	0.037705732	-1.566122605	0.019939596	0.123031676	0.19131099	0.783121579	0.12044296	0.160549211	1	0.208447306	1.010824503	0.090441628	0.026397892	-2.040202589	0.006522025	0.119726195	0.276887318	1	0.075703132	-0.358439832	1	0.203625108	1.215352941	0.724684135
ENSBTAG00000001003	CKMT2	0.000881147	-3.382262453	7.07E-06	0.003765117	-1.717154533	0.005073476	0.027372561	1.462413704	6.04E-05	0.002574635	-2.177930419	0.001365648	0.001792167	-2.471532923	0.009367103	0.002854334	-2.009626854	0.010469574	0.042225421	2.025808954	0.258599925	0	-3.89326688	0.001904933	0.001128731	-2.982983871	0.000132968	0	-2.721356329	0.951640972	0.001912361	-2.163470358	0.175004936	0.155987541	4.794385184	2.42E-44	0	0.263756111	1	0	-0.200951934	1	0	2.375613921	1
ENSBTAG00000011803	MYH3	0.518995663	-1.697529289	7.20E-06	0.4702631	-1.869743384	6.82E-08	1.888285581	0.335460416	0.537790443	0.108134682	-4.007693733	8.87E-22	0.083634469	-4.323971629	8.30E-17	0.310646681	-2.449263158	9.08E-09	6.981269542	2.205779699	0.090950702	0.095579646	-4.086727922	1.99E-10	0.187933707	-3.160431118	1.90E-12	0.906189887	-0.786313329	1	0.09466185	-4.092326697	9.56E-09	23.10415465	5.369586388	9.73E-97	1.466645893	-0.082249401	1	0.865178651	-0.837349514	1	1.357500718	-0.211263825	0.724684135
ENSBTAG00000004729	PKMYT1	0.109262245	-1.601781911	7.28E-06	0.347143777	0.21387503	0.952043434	0.075379821	-2.161845049	2.52E-10	0.443266375	0.627667673	0.115846245	0.4205619	0.512100286	0.64180505	0.55136218	1.000268966	0.002303821	0.816358132	1.435334425	0.224850941	0.095579646	-1.729520453	0.002774228	0.329025079	0.116625137	0.893088846	0.294416124	-0.051450456	1	0.509644102	0.793324708	0.284976048	0.051595879	-2.591456279	9.86E-05	0.254418165	-0.206951731	1	0.270368328	-0.139157875	1	0.203625108	-0.268489921	0.724684135
ENSBTAG00000019743	CHTF18	0.108381098	-1.599389578	7.56E-06	0.485700079	0.82833825	0.00508633	0.120860384	-1.441276898	2.13E-05	0.436400681	0.617251993	0.128575448	0.266435522	-0.201019417	1	0.437188821	0.610098369	0.296664753	0.795245422	1.411306196	0.230289576	0.092949013	-1.755983236	0.002320227	0.357243354	0.264589056	0.613805103	0.359417086	0.257730674	1	0.416894612	0.492992356	0.926294955	0.074394058	-2.054785036	0.002069858	0.179589293	-0.663721569	1	0.118962065	-1.244157234	1	0.407250215	0.553549681	0.724684135
ENSBTAG00000004094	SPARCL1	0.259497831	1.219501389	7.93E-06	0.127260951	-0.021753729	1	0.112859174	-0.216232713	0.862835368	0.086250282	-0.641993926	0.298693915	0.100958751	-0.37841368	1	0.097523078	-0.44284448	1	0.182976823	0.550776569	0.654962316	0.072780831	-0.8516895	0.358914244	0.025396447	-2.430442848	1.79E-08	0.074559927	-0.776629454	0.992403538	0.057370818	-1.19476517	0.303336772	0.485961186	2.107875949	2.35E-09	0.179589293	0.570994131	1	0.194665197	0.657314239	1	0.067875036	-0.024055954	0.783301076
ENSBTAG00000011814	CENPP	0.125122893	-1.558942977	8.24E-06	0.607313355	1.030440194	8.06E-05	0.155813039	-1.2325244	0.000245614	0.589162375	0.945757314	0.001242492	0.273006801	-0.344302786	1	0.384859364	0.200685935	1	0.274465234	-0.287257858	1	0.096456523	-1.872874495	0.000713667	0.442462542	0.423352228	0.302603039	0.181620336	-0.9138079	0.960297367	0.414026071	0.301671143	1	0.088792908	-1.970052293	0.002447441	0.164623519	-0.947536894	1	0.324441994	-0.038770859	1	0.135750072	-0.837683291	0.802755664
ENSBTAG00000000632	RAD54B	0.032602444	-1.772353595	9.45E-06	0.146463047	0.608677118	0.129618713	0.027793677	-2.015357506	1.09E-07	0.169067717	0.848586487	0.014221109	0.084231858	-0.309976502	1	0.143668143	0.552300976	0.530872498	0.288540374	1.526677212	0.227869926	0.046474507	-1.175814391	0.132154856	0.147863758	0.588012039	0.141725781	0.087942479	-0.209471928	1	0.153945029	0.625383064	0.731639373	0.022798179	-2.157646364	0.00445767	0.089794647	-0.001340761	1	0.075703132	-0.272667471	1	0.271500144	1.623618834	0.724684135
ENSBTAG00000021190	CDH2	0.031280723	-1.772099398	9.73E-06	0.045557914	-1.231218541	0.001440676	0.014739071	-2.874606375	1.29E-12	0.096977929	-0.030024724	1	0.091400526	-0.119144515	1	0.048523678	-1.105641121	0.041226175	0.492629907	2.367406935	0.046613	0.111363441	0.189559552	0.957615152	0.430046502	2.723632631	9.58E-29	0.164414199	0.771190846	0.951640972	0.112829276	0.209415613	1	0.008399329	-3.429054237	1.80E-05	0.089794647	0.058013044	1	0.021629466	-1.632152097	1	0	-0.642078642	1
ENSBTAG00000010866	BMPER	0.003524589	-2.911335195	9.80E-06	0.001882558	-3.76513834	7.59E-09	0.001684465	-3.845014821	1.90E-08	0.002574635	-3.322925486	9.42E-07	0.001792167	-3.60618245	7.62E-05	0.002378612	-3.379885378	1.04E-05	0.190014393	2.942464358	0.046741394	0.00701502	-1.824940018	0.128160351	0.227439292	5.227768635	5.74E-65	0.049706618	0.984827982	0.951640972	0.00095618	-3.882525754	0.00544413	0.005999521	-1.941989379	0.151524893	0.029931549	0.729911182	1	0.043258933	1.007882382	1	0	1.251115379	1
ENSBTAG00000011538	KIF1A	0.326465014	1.220740641	9.93E-06	0.099022574	-0.797368593	0.074841238	0.229929511	0.591717326	0.081437586	0.106418258	-0.672440671	0.261311433	0.094387472	-0.831813073	0.408303342	0.124163528	-0.424106322	1	0.626343739	1.984666856	0.100387877	0.218342494	0.463505166	0.56192596	0.018624061	-3.20757888	2.20E-12	0.172061371	0.098916194	1	0.039203392	-2.079432859	0.004691077	0.416366744	1.467815772	0.000340268	0.254418165	0.711496562	1	0.064888399	-1.120933214	1	0.135750072	0.231371443	0.724684135
ENSBTAG00000012225	KPNA2	1.777714346	-1.458094649	1.07E-05	8.910902146	1.229085011	2.39E-07	2.517012248	-0.930917951	0.004880061	8.712136702	1.148935499	9.59E-06	2.013201139	-1.240080032	0.007289546	4.599759203	0.030379327	1	5.855258325	0.370490188	0.695319591	1.111003773	-2.090032323	2.69E-05	4.763244717	0.085445925	0.984075326	2.663127665	-0.779297033	0.960297367	3.943287571	-0.206265724	1	2.670986666	-0.784505264	0.317184064	2.424455456	-0.911330053	1	3.969007062	-0.197751521	1	5.973003159	0.326288693	0.724684135
ENSBTAG00000049516	ARL6IP1	0.848985265	-1.460637269	1.12E-05	5.281705975	1.675231834	2.68E-14	1.10332476	-1.066069848	0.000996672	4.201375681	1.163762274	7.41E-06	0.869798474	-1.392545634	0.001596391	1.334401134	-0.761492082	0.170040854	3.800287855	0.816254943	0.453309901	0.737453965	-1.608893813	0.003607397	2.137816468	-0.016450545	1	1.89841046	-0.192102128	1	1.262158	-0.809496114	0.616213933	0.808735405	-1.457253299	0.02959665	1.721064059	-0.337342662	1	2.022355097	-0.102906985	1	1.832625969	-0.279204273	0.724684135
ENSBTAG00000014623	MCM8	0.011895486	-1.982313258	1.22E-05	0.073043268	0.887348155	0.010055834	0.015160188	-1.63842111	0.000111317	0.065224094	0.664022761	0.161168294	0.041219845	-0.094812356	1	0.063746792	0.614707093	0.471676301	0.112601122	1.438978403	0.299549363	0.01052253	-2.029080735	0.005975607	0.05248599	0.285722424	0.674558141	0.042059446	-0.016602812	1	0.066932621	0.656873546	0.780296636	0.008399329	-2.261621103	0.008584105	0.044897323	0.411980265	1	0.075703132	0.954150398	1	0.067875036	1.520411245	0.724684135
ENSBTAG00000004036	GJC1	0.108821671	-1.550910941	1.22E-05	0.346390754	0.27507635	0.83678219	0.077485403	-2.064752301	8.82E-10	0.40421774	0.532861377	0.253782834	0.259864242	-0.196037798	1	0.402461091	0.51691896	0.500833484	0.541892898	0.895776511	0.434331196	0.183267394	-0.714647177	0.466339149	0.568316046	1.091783898	0.000185657	0.367064258	0.330943561	0.999285842	0.434105858	0.600163187	0.677779053	0.068394537	-2.134387179	0.0011755	0.254418165	-0.15231299	1	0.20547993	-0.464502233	1	0.407250215	0.594141633	0.724684135
ENSBTAG00000052382	H2B	0.019825811	-1.780502802	1.25E-05	0.077561408	0.343386116	0.701258295	0.038321585	-0.7966716	0.065704389	0.103843623	0.844234713	0.015294899	0.034051177	-0.941739014	0.284695089	0.109891858	0.92943838	0.013508448	0.042225421	-0.38365675	1	0.02104506	-1.599543666	0.019111522	0.073367513	0.237740888	0.719704216	0.049706618	-0.314170977	1	0.122391079	1.032394397	0.086984101	0.026397892	-1.245721192	0.14748734	0.029931549	-0.527886576	1	0.010814733	-1.578748939	1	0	-0.003373918	1
ENSBTAG00000016433	FANCB	0.002643441	-2.634550477	1.36E-05	0.024096748	0.607762572	0.357480744	0.002526698	-2.708737558	2.35E-06	0.026175459	0.740177021	0.192967698	0.011350392	-0.570901318	1	0.033300563	1.153689281	0.010410037	0.042225421	1.525927955	0.38620665	0.00701502	-1.176568347	0.316218117	0.027089543	0.774391202	0.118105836	0.005735379	-1.197020187	0.964450009	0.03155395	0.991106679	0.392427535	0.001199904	-2.901265444	0.01197991	0	-0.22520457	1	0.010814733	0.314506057	1	0	1.88665324	1
ENSBTAG00000013915	DSN1	0.157725337	-1.519988954	1.36E-05	0.544435902	0.453613492	0.363092075	0.094330056	-2.29344036	7.72E-12	0.769386845	1.059640271	0.000121765	0.494040754	0.266948585	1	0.599410135	0.599758579	0.296515945	0.394103926	-0.070657213	0.984057841	0.215711861	-0.994163945	0.166424816	0.432303964	0.054106466	0.99407137	0.424418048	0.025798271	1	0.595700329	0.547547212	0.786981509	0.080393579	-2.411615253	0.000177996	0.463939007	0.174837105	1	0.335256727	-0.28987094	1	0.678750359	0.742311079	0.724684135
ENSBTAG00000006972	TRIP13	0.137458953	-1.525896783	1.40E-05	0.536905669	0.666892373	0.046564259	0.130124943	-1.614628412	1.01E-06	0.514068845	0.574523486	0.176235112	0.335135264	-0.137049827	1	0.462402104	0.386078038	1	0.344840935	-0.067489116	0.981255132	0.085057116	-2.160675258	7.90E-05	0.615722747	0.855695628	0.006804362	0.470301081	0.37652222	0.984104183	0.56605874	0.676768563	0.491834374	0.055195591	-2.754921665	2.47E-05	0.389110135	0.121694108	1	0.400145126	0.152313921	1	0.33937518	0.059269258	0.724684135
ENSBTAG00000011677	HIST1H1C	0.391669902	-1.491413452	1.45E-05	1.30837812	0.431422259	0.404033997	0.362581152	-1.613902365	5.87E-07	1.78250583	0.968784018	0.000629489	0.625466348	-0.753830501	0.343350964	1.862452919	1.029132435	0.000826116	0.724869721	-0.488252328	1	0.319183404	-1.731343573	0.001586843	1.063828944	0.071251485	1	0.936778575	-0.122009278	1	1.723036907	0.819001776	0.266902225	0.317974603	-1.718766456	0.007964981	0.793186044	-0.354604299	1	0.58399559	-0.792765438	1	0.678750359	-0.541410602	0.724684135
ENSBTAG00000009586	CDC25A	0.072254065	-1.582439133	1.65E-05	0.175077935	-0.220583919	1	0.088855544	-1.276325004	0.000277514	0.160914705	-0.351501831	0.867133829	0.249708628	0.355567702	1	0.348704467	0.940488328	0.005297323	0.548930468	1.48189074	0.215178365	0.097333401	-1.075814993	0.139460565	0.342569851	0.885171473	0.004569882	0.353681707	0.857029886	0.951640972	0.359523794	0.91480276	0.135676759	0.058795304	-1.786732013	0.010166058	0.344212812	0.824922623	1	0.162220997	-0.227789979	1	0.135750072	-0.071191327	0.725879652
ENSBTAG00000003458	CDCA7	0.109702818	-1.522828663	1.98E-05	0.232684224	-0.371017331	0.726768755	0.109069127	-1.537710149	4.42E-06	0.219273105	-0.458803364	0.625383191	0.480300806	0.813090302	0.061112073	0.561352349	1.120622455	0.000236138	0.408179066	0.50347928	0.641426143	0.177129252	-0.749607218	0.424876655	0.321688328	0.158061252	0.815288917	0.453094944	0.661250828	0.951640972	0.709485785	1.408113656	0.000410381	0.079193675	-1.908512866	0.00408772	0.254418165	-0.13702155	1	0.37851566	0.402968042	1	0.33937518	0.386750479	0.724684135
ENSBTAG00000000310	MFAP5	0.007930324	-2.091550073	2.04E-05	0.007906745	-2.133000491	2.19E-06	0.007158977	-2.246150184	1.51E-06	0.010727647	-1.665311456	0.000713242	0.007168669	-2.164007894	0.000858993	0.007135835	-2.22165447	6.30E-05	0.084450841	1.507037499	0.30605123	0.01403004	-1.170436584	0.244181393	0.257350662	4.79792493	8.82E-83	0.01911793	-0.640912549	1	0.008605623	-1.820308429	0.100430556	0.002399808	-3.229669635	0.001137389	0	-1.138844285	1	0.021629466	-0.013898134	1	0	0.973013525	1
ENSBTAG00000009145	SLC7A4	0.073135212	1.367361573	2.06E-05	0.02221419	-0.66108847	0.400590986	0.027372561	-0.322688411	0.762207709	0.022313506	-0.640269765	0.522102876	0.046596347	0.533079633	0.885200032	0.036630619	0.147764005	1	0.091488411	1.550861247	0.293915875	0.049105139	0.604136934	0.49408549	0.003386193	-3.226255022	1.02E-07	0.01911793	-0.706077596	1	0.021992147	-0.590170775	1	0.038396933	0.234468987	0.945277958	0.029931549	0.386475269	1	0.043258933	0.663234211	1	0	0.908883187	1
ENSBTAG00000015014	CENPO	0.04934424	-1.577226976	2.13E-05	0.242850039	1.025276063	0.000120294	0.066115262	-1.141500995	0.001453081	0.194384964	0.598361866	0.143907091	0.101556141	-0.456117871	1	0.16745426	0.337381798	1	0.084450841	-0.593294145	1	0.053489527	-1.386065085	0.030012012	0.181725687	0.464374916	0.261575462	0.179708543	0.420363791	0.981110943	0.173068635	0.369723459	1	0.027597796	-2.300170847	0.000887778	0.13469197	0.10946386	1	0.086517865	-0.507803552	1	0.135750072	0.480466658	0.724684135
ENSBTAG00000000140	EPHX1	0.120276584	1.254635716	2.21E-05	0.072666756	0.366245596	0.687661583	0.03200484	-0.952163679	0.026987999	0.062220353	0.100350368	1	0.047193736	-0.32925434	1	0.04091212	-0.562904846	0.982251717	0.112601122	1.022634707	0.44196618	0.098210278	0.812387768	0.155947028	0.038376853	-0.647962594	0.295315653	0.036324067	-0.641150598	1	0.025816868	-1.184725918	0.424575842	0.015598754	-1.858924534	0.024116096	0.119726195	1.17762938	1	0.054073666	0.1240754	1	0	0.109229503	1
ENSBTAG00000012784	RACGAP1	0.478462894	-1.418298723	2.23E-05	2.304251537	1.200698895	6.26E-07	0.429959763	-1.585806928	4.30E-07	2.209466181	1.085566592	4.82E-05	0.753904996	-0.700478881	0.435173768	1.204053216	0.027266954	1	1.506040002	0.346758193	0.713699764	0.375303563	-1.716788798	0.001660528	1.299169353	0.148322262	0.874011731	1.317225385	0.157870682	1	1.235384952	0.064783311	1	0.314374891	-1.956950401	0.001977008	1.152364631	-0.041918522	1	0.940881783	-0.33195477	1	1.289625682	0.102744892	0.724684135
ENSBTAG00000014727	RFC4	0.225133093	-1.464895376	2.40E-05	0.831714321	0.640891916	0.056931914	0.209715928	-1.577982309	1.15E-06	0.805860844	0.570125662	0.172941494	0.622479403	0.126393664	1	0.958580494	0.861917588	0.013759698	0.485592337	-0.234972793	1	0.213958106	-1.478305197	0.010049959	0.627574422	0.140184528	0.894595504	0.384270395	-0.590605072	1	0.907415108	0.707531783	0.492368059	0.154787637	-1.931449014	0.002575139	0.314281263	-0.82823587	1	0.659698722	0.207111679	1	0.543000287	-0.007600051	0.724684135
ENSBTAG00000021708	CEP128	0.042735636	-1.61646002	2.41E-05	0.224400967	1.09770802	4.01E-05	0.026109212	-2.35065487	2.03E-10	0.250597834	1.275332746	2.09E-06	0.075271022	-0.73407334	0.582326578	0.140338087	0.23816647	1	0.323728225	1.451114789	0.235959401	0.043843874	-1.502587539	0.020350415	0.132061524	0.136565263	0.869999268	0.131913718	0.138328423	1	0.110916915	-0.129606906	1	0.033597317	-1.854427632	0.010542517	0.089794647	-0.238379959	1	0.064888399	-0.703088003	1	0	-0.937619472	1
ENSBTAG00000010077	FANCD2	0.152879028	-1.487915712	2.45E-05	0.689016391	0.979669847	0.000237396	0.204241415	-1.052344989	0.002291515	0.648808092	0.843410192	0.006993545	0.28674675	-0.504664221	1	0.529954675	0.479325729	0.7014183	0.788207852	1.003512962	0.375775544	0.073657709	-2.486775445	5.06E-06	0.435690157	0.150419496	0.82600062	0.414859083	0.069842951	1	0.458966546	0.224694834	1	0.075593962	-2.423672474	0.000179533	0.553733654	0.499736569	1	0.20547993	-0.894420944	1	0.135750072	-1.058071505	0.825908316
ENSBTAG00000014278	TBX2	0.001321721	-3.558419408	2.64E-05	0.001882558	-3.225351978	1.82E-05	0.002947814	-2.615927748	0.000353391	0.003861953	-2.254661274	0.005184764	0.005376502	-1.721967292	0.271221759	0.001902889	-3.107297047	0.000844312	0.070375701	2.090806209	0.260278254	0.01052253	-0.73378248	0.882821895	0.152943047	5.049337416	1.15E-45	0.026765102	0.65311563	0.984104183	0.001912361	-2.758804543	0.175004936	0.001199904	-3.003748402	0.069962047	0	-0.327384965	1	0.021629466	0.801113485	1	0.067875036	2.788588954	0.724684135
ENSBTAG00000044175	CENPK	0.188565487	-1.461746833	2.89E-05	0.834349903	0.978402678	0.000211655	0.155391922	-1.759108103	7.20E-08	0.82302508	0.92642545	0.001556293	0.40741934	-0.258787978	1	0.648409535	0.49560184	0.623568136	0.436329346	-0.128099526	1	0.13942352	-1.842060206	0.000797531	0.547434523	0.208539726	0.76169887	0.359417086	-0.425176544	1	0.625341918	0.405420153	1	0.076793866	-2.680234056	2.98E-05	0.50883633	0.102407163	1	0.37851566	-0.321500698	1	0.746625395	0.666310662	0.724684135
ENSBTAG00000011500	CASQ2	0.000881147	-4.010293675	3.14E-05	0.001129535	-3.851419682	7.41E-06	0.004211163	-2.1773146	0.006270121	0.002145529	-3.041379903	0.000697946	0.001194778	-3.520860636	0.006069612	0.000951445	-3.885251052	0.000275703	0.140751402	3.032178479	0.090995381	0	-4.516920769	0.006142682	0.003950558	-2.175628949	0.025497866	0.009558965	-0.739813234	1	0	-4.384523851	0.037365087	0.35757144	6.740727047	6.62E-55	0.029931549	1.233124492	1	0.021629466	0.768416448	1	0	1.751960032	1
ENSBTAG00000010175	COL8A2	0.110143392	1.271105141	3.28E-05	0.061371405	0.242085144	0.934676703	0.041269399	-0.405796424	0.596492704	0.049347176	-0.119338036	1	0.049583292	-0.102548004	1	0.054708068	0.048965528	1	0.091488411	0.879377656	0.524078507	0.036828854	-0.533553318	0.801118179	0.012980406	-2.089787545	2.71E-05	0.07647172	0.566691165	0.961534014	0.023904508	-1.151894007	0.52343288	0.050395975	-0.057009873	1	0.074828872	0.728486297	1	0.021629466	-0.740487975	1	0.067875036	1.249696102	0.724684135
ENSBTAG00000010196	NUP43	0.077540948	-1.51476289	3.41E-05	0.25188632	0.349662659	0.621761195	0.103594615	-1.080893244	0.002363894	0.233004493	0.211049565	0.972248362	0.221033953	0.119291376	1	0.315879627	0.721885572	0.088951291	0.260390094	0.373321795	0.729776178	0.113117196	-0.89164657	0.279236095	0.300242439	0.619413758	0.080940889	0.26000385	0.358600969	0.994129097	0.298328255	0.579954643	0.740656674	0.070794346	-1.557038682	0.02742337	0.179589293	-0.100506466	1	0.248738862	0.323384208	1	0.135750072	-0.107821303	0.728607089
ENSBTAG00000001617	G2E3	0.035686459	-1.614349436	3.68E-05	0.206328406	1.287224015	4.91E-07	0.045059446	-1.270825846	0.000644876	0.192239435	1.113645849	0.000110647	0.044206791	-1.259086522	0.033216666	0.106086079	0.075454646	1	0.246314954	1.323143818	0.288069679	0.028936957	-1.834919424	0.003720789	0.105536346	0.066902052	0.989855299	0.049706618	-1.00088407	0.960297367	0.109004555	0.118291027	1	0.055195591	-0.881355425	0.383669606	0.089794647	0.02165975	1	0.054073666	-0.666188421	1	0.067875036	0.322427986	0.749839411
ENSBTAG00000039046	CD24	0.000440574	-3.574907531	3.72E-05	0.000376512	-3.83511787	2.18E-06	0.001684465	-2.302363126	0.001120443	0.000858212	-3.024985465	0.000225535	0.001194778	-2.492291484	0.024138543	0.001902889	-2.103133422	0.019823878	0.02111271	1.602059024	0.521819543	0.009645652	0.180842335	1	0.078446803	5.165158174	1.93E-56	0.013382551	0.733438879	0.997551712	0.001912361	-1.762932428	0.519202169	0	-3.02014284	0.044177498	0	0.660336705	1	0	0.195628661	1	0	2.772194515	1
ENSBTAG00000051782	ATAD2	0.487274366	-1.381195765	3.96E-05	1.470654658	0.381389616	0.531517579	0.464912418	-1.458127194	3.39E-06	1.716423524	0.639989914	0.084312624	1.252127474	0.09859192	1	1.929054046	0.832309364	0.019228339	1.836805797	0.644123083	0.548220426	0.498943289	-1.288353222	0.031389324	1.292961332	0.15064028	0.869520281	1.34590228	0.1991678	1	1.754590857	0.617763075	0.6969043	0.367170674	-1.721809459	0.007444967	1.167330405	-0.014455671	1	0.800290252	-0.554384275	1	0.950250503	-0.303618484	0.724684135
ENSBTAG00000014465	SERPINE1	2.284814522	-1.393821905	4.21E-05	1.384056969	-2.17188606	1.83E-12	1.905130234	-1.674449176	1.31E-07	3.668426177	-0.667032053	0.164259793	6.641174202	0.283154872	1	2.650724819	-1.159682188	0.004412944	31.6831406	2.552871783	0.017868109	6.08289911	0.137511315	1	23.77163871	2.686675625	6.51E-33	7.945411755	0.530437873	0.968452876	7.659960411	0.493303061	0.980782134	0.833933393	-2.791600794	1.07E-05	6.629838069	0.236897533	1	3.093013678	-0.85946692	1	4.276127262	-0.450852734	0.724684135
ENSBTAG00000004272	ISG12(B)	0.098247906	-1.484917468	4.24E-05	0.080950013	-1.800085854	3.76E-08	0.052218424	-2.431198135	3.02E-12	0.284497199	0.183568049	1	0.281370248	0.159226408	1	0.11845486	-1.193321123	0.00674882	0.260390094	0.059310356	0.916243819	0.43931562	0.854999978	0.061505434	1.102770163	2.715415944	6.43E-32	0.126178339	-1.015987085	0.954409037	0.265818124	0.067881466	1	0.037197029	-2.787953226	3.55E-05	0.119726195	-0.944413693	1	0.302812528	0.284901979	1	0.271500144	0.318256622	0.724684135
ENSBTAG00000014576	GUCY1A1	0.003084015	-2.455325915	4.31E-05	0.003765117	-2.24268412	2.70E-05	0.000842233	-3.966644266	3.52E-09	0.009011224	-0.97542964	0.180537621	0.011350392	-0.589516996	1	0.000951445	-3.767414562	6.63E-07	0.063338131	2.036013736	0.199761869	0.020168182	0.289095225	0.962952407	0.119645483	4.123694527	5.65E-51	0.026765102	0.741381381	0.968452876	0.009561803	-0.763681686	1	0	-3.923224697	0.001562292	0	-0.242745151	1	0.010814733	0.296911997	1	0	1.869112659	1
ENSBTAG00000014595	LIG1	0.329989602	-1.420862818	4.36E-05	1.131794137	0.560496344	0.138460341	0.432486461	-1.012869127	0.002054127	1.108809596	0.511653722	0.273046165	0.779592726	-0.076104673	1	1.202150326	0.641474726	0.188488943	1.689016825	1.053069102	0.344350261	0.288492692	-1.559185537	0.005606737	1.075116254	0.441092874	0.305930249	0.636627073	-0.369514422	1	1.237297313	0.639940147	0.650136285	0.209983228	-2.004029419	0.001625655	0.553733654	-0.547921949	1	0.627254522	-0.375963677	1	0.543000287	-0.516756257	0.724684135
ENSBTAG00000010597	GGCT	0.126885187	-1.448097133	4.40E-05	0.531257993	0.889393081	0.001470302	0.188238995	-0.849913621	0.019506737	0.384478869	0.301775784	0.769896092	0.269422467	-0.272450248	1	0.517585894	0.80402139	0.035670573	0.161864112	-0.941787623	1	0.078918974	-2.077073497	0.00015642	0.389412187	0.312001279	0.509126387	0.189267508	-0.766943289	0.984104183	0.453229464	0.534388034	0.82114892	0.128389745	-1.349358049	0.057281584	0.164623519	-0.861688771	1	0.324441994	0.047337647	1	0.33937518	0.248750692	0.724684135
ENSBTAG00000006770	MTBP	0.071372918	-1.504840017	5.20E-05	0.272970975	0.649875455	0.058863408	0.077064287	-1.395296896	6.68E-05	0.276344187	0.655765341	0.083590888	0.151736822	-0.330394102	1	0.271161728	0.612324794	0.267254136	0.422254206	1.19520009	0.313591778	0.055243282	-1.808389709	0.002254245	0.259608124	0.526020398	0.175205321	0.128090132	-0.547373624	1	0.310758599	0.78448923	0.324433281	0.049196071	-1.948530371	0.004936446	0.13469197	-0.351433836	1	0.118962065	-0.552298789	1	0.203625108	0.436072539	0.724684135
ENSBTAG00000010719	ANGPTL1	0.002202868	-2.879241565	5.20E-05	0.001129535	-3.733238256	1.06E-07	0.000421116	-4.555985207	1.45E-08	0.002574635	-2.695677839	0.000109793	0.002986945	-2.389808526	0.013682549	0.001902889	-3.02165202	0.000205453	0.140751402	3.156549172	0.030744788	0.00701502	-1.194546088	0.46691974	0.143348834	5.011369566	1.45E-56	0.026765102	0.741381381	0.968848376	0.003824721	-1.927902548	0.345962176	0.002399808	-2.329518563	0.082579611	0.014965774	0.761620041	1	0.032444199	1.305682206	1	0	1.869112659	1
ENSBTAG00000023784	TMEM88B	0.030399576	1.521954009	5.21E-05	0.006024187	-1.152409555	0.089812654	0.016844653	0.46052988	0.548208467	0.004720165	-1.468592116	0.036308131	0.003584334	-1.743500454	0.085722716	0.006660113	-0.96005964	0.616393406	0.01407514	0.681597789	0.889228017	0.008768775	-0.470515924	0.945373564	0.002257462	-2.330907174	0.001378568	0.01911793	0.701394626	0.984104183	0.001912361	-2.260088548	0.154032526	0.070794346	2.784497697	1.15E-10	0.059863098	2.513232411	1	0.010814733	0.7090379	1	0	2.279798133	1
ENSBTAG00000009047	YPEL3	0.668790676	1.097253412	5.27E-05	0.270711904	-0.444643624	0.557352256	0.378162456	0.105090971	0.93010812	0.320112987	-0.168121443	1	0.295707586	-0.285175616	1	0.207890658	-0.842267882	0.130242481	0.197051963	-0.814050235	1	0.573477875	0.750022232	0.124002103	0.124160407	-1.60359027	3.30E-05	0.435888807	0.308503679	1	0.12525962	-1.547082853	0.035637454	0.718742593	1.087098433	0.010314988	0.733322947	1.059271445	1	0.37851566	0.117626149	1	0.203625108	-0.48258057	0.73662469
ENSBTAG00000006030	MYOG	1.303657187	-1.38317366	5.70E-05	1.617494216	-1.07141787	0.001277217	9.939187398	2.186439326	2.72E-23	0.200821552	-4.146064508	7.53E-28	0.177424551	-4.271785919	2.44E-20	1.075608187	-1.663683778	8.81E-06	2.596863368	-0.28678596	1	0.16046858	-4.373183627	4.24E-14	0.395055841	-3.118062833	6.85E-15	2.143119966	-0.570166074	1	0.162550652	-4.346809788	3.64E-12	27.72018596	3.772978113	6.62E-45	1.870721803	-0.763841448	1	2.552277021	-0.314408008	1	5.769378052	0.796037308	0.724684135
ENSBTAG00000015337	TSPAN12	0.049784813	-1.564515925	5.94E-05	0.041416286	-1.864937552	1.20E-07	0.037479353	-1.993578831	4.95E-08	0.081101012	-0.826091206	0.099825376	0.112309144	-0.301607922	1	0.074688406	-0.94286123	0.107243485	0.267427664	1.005661628	0.409735934	0.101717788	-0.438906808	0.856117088	0.686832799	3.097389546	6.62E-40	0.202650059	0.598316696	0.954409037	0.191236061	0.523746941	0.924392203	0.055195591	-1.318184884	0.103112653	0.239452391	0.878340758	1	0.129776798	0.024380629	1	0.33937518	1.481576851	0.724684135
ENSBTAG00000005390	GMFG	0.051547107	1.315956026	6.29E-05	0.023343725	-0.060184426	1	0.019371351	-0.352750564	0.711542301	0.024459035	0.019764042	1	0.01911645	-0.346520344	1	0.021883227	-0.153520861	1	0.00703757	-0.819183625	1	0.045597629	1.001872193	0.082019178	0.005643655	-2.092816066	0.000238077	0.015294344	-0.529595526	1	0.008605623	-1.413959511	0.381774135	0.021598275	-0.115181411	1	0.014965774	0.263756111	1	0.075703132	1.81774416	1	0	1.372521326	1
ENSBTAG00000009548	MAD2L1BP	0.003524589	-2.363403425	7.23E-05	0.023343725	0.431668671	0.713569364	0.008843443	-1.092175148	0.054136537	0.0218844	0.31770119	0.96046661	0.017324283	-0.045581764	1	0.027591895	0.702385201	0.5258541	0.049262991	1.622937754	0.339326767	0.009645652	-0.849259697	0.578423335	0.034426295	1.063073298	0.012077016	0.013382551	-0.279234951	1	0.027729229	0.683777291	0.975135266	0.005999521	-1.398027341	0.254261569	0	-0.323268856	1	0	-0.787976901	1	0	1.788588954	1
ENSBTAG00000002670	DEPP1	0.020706958	-1.705439094	7.79E-05	0.027861865	-1.287697332	0.001641174	0.110753592	0.97821418	0.00129875	0.0072948	-3.200700147	5.50E-12	0.004779112	-3.678912774	1.29E-09	0.015698837	-2.095263262	1.30E-05	0.077413271	0.4107965	0.753944849	0.007891897	-2.928739761	3.74E-05	0.003950558	-3.940199004	3.14E-12	0.028676895	-1.071489305	0.960297367	0.001912361	-4.541741752	6.78E-07	0.843532626	4.941110044	6.09E-74	0.089794647	0.710089741	1	0.054073666	0.021784519	1	0.135750072	1.594742131	0.724684135
ENSBTAG00000011405	CEP72	0.031721297	-1.693008207	7.83E-05	0.166041655	0.988050019	0.001457578	0.024845863	-2.060849527	3.01E-07	0.178508046	1.094986473	0.000570604	0.080647523	-0.252825549	1	0.140813809	0.654979677	0.311365536	0.309653085	1.746507119	0.183578364	0.022798815	-2.079130905	0.002658487	0.048535432	-1.028975988	0.043853393	0.131913718	0.502274989	0.970881815	0.130996702	0.499313639	1	0.021598275	-2.11598447	0.008938716	0.104760421	0.307763293	1	0.064888399	-0.35038756	1	0.135750072	1.000599356	0.724684135
ENSBTAG00000010880	TNNI2	0.062120873	-1.796243999	7.95E-05	0.072290244	-1.593399152	0.000150215	0.327207381	0.860334058	0.012298319	0.027891882	-2.974653789	8.07E-11	0.018519061	-3.499486985	3.59E-09	0.059941013	-1.838193514	0.000334628	0.323728225	0.731926523	0.548364732	0.021921937	-3.204390368	1.20E-05	0.020881523	-3.339405001	2.69E-10	0.080295306	-1.30011368	0.954409037	0.016255065	-3.605576101	2.21E-05	2.648188486	4.933935347	5.95E-63	0.089794647	-0.947727891	1	0.508292458	1.380917972	1	1.561125826	2.94824562	0.724684135
ENSBTAG00000046140	NPDC1	0.11366798	1.192248563	8.18E-05	0.039157216	-0.614181981	0.366284657	0.030320375	-0.998428864	0.018834534	0.071660682	0.375599574	0.718965896	0.053167627	-0.108604366	1	0.045669344	-0.354861315	1	0.049262991	-0.042460322	1	0.11837846	1.151491511	0.010387908	0.027653909	-1.103008276	0.026926782	0.059265583	0.08754738	1	0.033466311	-0.776607365	0.988000244	0.0287977	-0.973423865	0.362303631	0.059863098	0.358434964	1	0.237924129	2.119361806	1	0.067875036	1.144403043	0.724684135
ENSBTAG00000000109	NPTXR	0.059036858	-1.544967896	8.23E-05	0.060618382	-1.528690869	2.01E-05	0.034952655	-2.328727031	4.22E-10	0.122295176	-0.428272258	0.756199219	0.112309144	-0.543075478	1	0.095620188	-0.804912646	0.281849911	1.055635515	2.785056651	0.007699027	0.127147235	-0.340098056	0.959935336	0.721823459	2.821095919	4.41E-32	0.344122742	1.159363748	0.951640972	0.168287733	0.085595544	1	0.0287977	-2.468536142	0.000696998	0.284349714	0.887627926	1	0.17303573	0.187024092	1	0.067875036	-0.331004372	0.802692631
ENSBTAG00000015878	RHNO1	0.322499852	-1.374239556	8.25E-05	1.199942753	0.763775833	0.010205175	0.280042353	-1.593589846	7.79E-07	1.271011619	0.847362314	0.005422093	0.630842849	-0.323013688	1	1.048492014	0.499580807	0.591120035	0.415216636	-0.892126048	1	0.30690712	-1.388936645	0.017077018	0.926123765	0.285231135	0.607954544	1.135605049	0.569023536	0.954409037	0.937056697	0.290718523	1	0.233981312	-1.768441681	0.006022235	1.062569984	0.455025884	1	0.605625056	-0.348189236	1	0.746625395	-0.023958167	0.724684135
ENSBTAG00000021346	CCDC34	0.451587907	-1.332888054	8.25E-05	1.5847377	0.706997662	0.022899885	0.307414914	-1.918290788	2.65E-09	1.788513312	0.906113296	0.001887721	0.988678898	-0.104358204	1	1.149345148	0.137514327	1	1.147123927	0.118598037	0.854828101	0.455976292	-1.261844592	0.037151228	1.656412707	0.735332447	0.024964907	1.083986637	0.038138787	1	1.352038949	0.379383338	1	0.175186008	-2.638050397	2.70E-05	0.897946465	-0.232706976	1	0.908437584	-0.217033557	1	1.221750646	0.193322217	0.724684135
ENSBTAG00000005293	CDC25C	0.047141372	-1.514140441	8.31E-05	0.263181671	1.35613604	4.47E-08	0.049691726	-1.441413905	6.14E-05	0.228284329	1.043607703	0.00033482	0.0764658	-0.75500632	0.520607751	0.127969307	0.039258396	1	0.253352524	1.056624887	0.38722321	0.035951977	-1.831520167	0.002857508	0.117952387	-0.089414654	1	0.128090132	0.051627806	1	0.12525962	0.009438502	1	0.031197508	-2.001609491	0.005060065	0.104760421	-0.087590744	1	0.129776798	0.151177544	1	0.135750072	0.60619933	0.724684135
ENSBTAG00000008078	TRIM59	0.118954863	-1.410808559	8.91E-05	0.657765921	1.487410597	1.61E-10	0.074537589	-2.116408734	3.56E-10	0.696867951	1.553654467	1.91E-10	0.163087214	-0.904678851	0.208498809	0.17982304	-0.772277396	0.231717274	0.295577944	0.033255187	0.925860758	0.194666802	-0.618618525	0.583644821	0.253400104	-0.230530034	0.848144431	0.214120817	-0.45668811	1	0.176893356	-0.757870803	0.871908356	0.075593962	-1.98507919	0.002629977	0.224486616	-0.31707259	1	0.248738862	-0.194746784	1	0.678750359	1.252923753	0.724684135
ENSBTAG00000012443	DIAPH3	0.572305064	-1.326128525	8.94E-05	2.606966935	1.210969936	4.56E-07	0.554610194	-1.379397581	1.20E-05	2.584504721	1.158021517	8.56E-06	0.988081508	-0.466939619	1	1.271130064	-0.076403167	1	2.188684302	0.717421088	0.508080452	0.470006332	-1.560273396	0.005139317	1.274901637	-0.070319912	1	1.106928153	-0.274731745	1	1.362556932	0.033697886	1	0.235181216	-2.55007501	4.61E-05	1.152364631	-0.21304903	1	0.854363918	-0.641117111	1	1.15387561	-0.220086877	0.724684135
ENSBTAG00000008807	ENSBTAG00000008807	0.005727456	-2.169207896	8.96E-05	0.00677721	-1.973248789	7.80E-05	0.016844653	-0.606898048	0.385194525	0.003861953	-2.710252871	1.53E-06	0	-5.52690968	1.90E-08	0.007135835	-1.845301672	0.003443594	0.049262991	1.16541927	0.494396219	0.007891897	-1.580596752	0.1079041	0.001693096	-3.607981033	2.04E-07	0.015294344	-0.56376213	1	0.001912361	-3.20653908	0.005072393	0.418766553	5.887446566	2.31E-84	0.014965774	0.230096799	1	0.032444199	0.771450508	1	0	1.338933258	1
ENSBTAG00000005603	CXCL11	0.096926185	1.166615094	0.000103836	0.082079548	0.889325804	0.005669128	0.055587354	0.194963194	0.820565509	0.026175459	-0.995703432	0.046034193	0.021506006	-1.247896751	0.063816166	0.074212683	0.676653575	0.254570975	0.02815028	-0.514183346	1	0.012276285	-1.98792341	0.00432471	0.02257462	-1.183604066	0.01438527	0.028676895	-0.721356329	1	0.023904508	-1.04486704	0.60065187	0.025197987	-0.947974055	0.368435761	0	-1.75927836	1	0.043258933	0.104048345	1	0	0.35257945	1
ENSBTAG00000014773	HMMR	0.793913569	-1.314881511	0.000103836	4.409328391	1.637243927	1.27E-13	0.997203447	-0.970324968	0.003164729	3.788575823	1.277864519	3.33E-07	0.898473149	-1.099005548	0.027890501	1.277790177	-0.575216807	0.584091912	1.871993647	0.024714417	0.909286	0.415639928	-2.209597148	2.57E-05	1.651333417	-0.166774584	0.901807738	1.0667805	-0.79924399	0.977833535	1.282237787	-0.54204427	1	0.32877374	-2.529900484	5.00E-05	0.91291224	-1.007353295	1	1.081473314	-0.766431465	1	1.696875898	-0.15074097	0.724684135
ENSBTAG00000040169	ENSBTAG00000040169	0.054190549	-1.49611153	0.000105116	0.207457941	0.659366051	0.061049976	0.065694146	-1.211323776	0.000941498	0.175075199	0.351057097	0.694846472	0.125451703	-0.190345903	1	0.196473322	0.540033029	0.507595718	0.394103926	1.50611589	0.218325655	0.051735772	-1.492332619	0.020798899	0.188498073	0.459931661	0.286199637	0.195002887	0.48281661	0.968452876	0.225658552	0.721764105	0.468229988	0.04319655	-1.725707951	0.018536099	0.224486616	0.73401558	1	0.064888399	-0.928154559	1	0	-1.162146058	1
ENSBTAG00000007137	RFC5	0.309723218	-1.358866305	0.000105899	1.144595535	0.769821462	0.0093679	0.316258357	-1.33269334	4.69E-05	1.030712326	0.565700489	0.176495344	0.705516482	-0.069182766	1	1.065142295	0.612595034	0.247786012	1.006372525	0.452753139	0.657607573	0.319183404	-1.256370281	0.039833575	0.883231988	0.290265955	0.5974874	0.575449696	-0.364439769	1	1.043192711	0.535854535	0.901133866	0.173986104	-2.124679427	0.000792581	0.553733654	-0.397269438	1	0.746216587	0.022679384	1	0.33937518	-0.951670466	0.756596434
ENSBTAG00000044006	GINS2	0.194733517	-1.368877906	0.000106942	0.548577531	0.27416578	0.826163074	0.146969596	-1.798810064	3.55E-08	0.599460916	0.418891529	0.512554597	0.52868932	0.198254116	1	0.769243007	0.841029393	0.019265542	0.147788972	-1.610284251	0.930693213	0.151699805	-1.675918727	0.00266547	0.747219906	0.770073585	0.018429477	0.460742116	-0.016791365	1	0.816577979	0.870655426	0.149326558	0.079193675	-2.593828663	5.00E-05	0.329247037	-0.46305152	1	0.421774592	-0.12662543	1	0.203625108	-0.877843036	0.773628033
ENSBTAG00000001543	BRI3BP	0.052868828	-1.455767444	0.000108494	0.158887933	0.279377834	0.80199952	0.061482983	-1.23375968	0.000513424	0.156623647	0.249745909	0.911199888	0.148749876	0.158589155	1	0.235006831	0.940565925	0.005318952	0.175939253	0.431425534	0.720205679	0.067519566	-1.027924266	0.172369924	0.119081118	-0.19284802	0.919109991	0.160590613	0.27202996	1	0.305021517	1.288253165	0.00341095	0.049196071	-1.465141537	0.045589213	0.119726195	-0.025750506	1	0.086517865	-0.490458551	1	0.067875036	-0.087752579	0.802167867
ENSBTAG00000038173	ENSBTAG00000038173	0.054631122	-1.474997082	0.00011538	0.178090029	0.398663943	0.514084978	0.068220844	-1.144715587	0.001700806	0.219273105	0.751812665	0.030811424	0.086024025	-0.760150486	0.505025998	0.249754223	0.96833439	0.004422797	0.098525981	-0.433969285	1	0.047351384	-1.611855676	0.009849097	0.165923453	0.261961621	0.639872617	0.208385438	0.590475103	0.954409037	0.206534946	0.59223763	0.750717736	0.053995687	-1.398027341	0.065905921	0.13469197	0.061314846	1	0.054073666	-1.142509661	1	0.271500144	1.170484571	0.724684135
ENSBTAG00000006608	GGT5	0.189887208	1.098314975	0.000122677	0.096763504	-0.064898714	1	0.109069127	0.134000153	0.896157404	0.081959223	-0.330330675	0.917491289	0.091400526	-0.147158891	1	0.106561802	0.094577052	1	0.049262991	-0.857372595	1	0.105225298	0.075200036	1	0.048535432	-1.114818182	0.012389562	0.068824548	-0.528065627	1	0.051633736	-0.981830316	0.587032533	0.10079195	0.013717735	1	0.074828872	-0.19097709	1	0.118962065	0.348839789	1	0.135750072	0.91862357	0.724684135
ENSBTAG00000019166	NSMCE4A	0.246721198	-1.3533526	0.000122743	0.832843856	0.611172438	0.080692873	0.200030252	-1.676117785	2.42E-07	0.814013856	0.556601741	0.192967698	0.619492457	0.090337907	1	0.821572463	0.563249206	0.386147771	0.464479627	-0.324448338	1	0.309537752	-0.959149818	0.187808249	0.856142445	0.618738319	0.084473488	0.349858121	-0.753831648	0.986677003	0.873948797	0.620284572	0.700198618	0.122390225	-2.296881298	0.000292854	0.26938394	-1.065907284	1	0.778660786	0.418300247	1	0.746625395	0.382078198	0.724684135
ENSBTAG00000033603	IP6K3	0.032602444	1.574183967	0.000126194	0.011295351	-0.266979992	1	0.019792467	0.660589888	0.291509832	0.004291059	-1.66508952	0.03118927	0.005973891	-1.132395538	0.667663857	0.008563002	-0.661369013	1	0.02111271	1.039377971	0.68711407	0.013153162	0.034281326	1	0.003386193	-1.897527095	0.014799045	0.017206137	0.493214357	1	0.001912361	-2.322948572	0.203286712	0.039596837	1.708377064	0.005061141	0.014965774	1.111133968	1	0	-0.359133602	1	0.067875036	3.222991778	0.724684135
ENSBTAG00000005299	EDNRB	0	-4.137843725	0.000131145	0.000376512	-3.386913507	0.000147848	0	-4.212030806	3.27E-05	0.001716424	-1.814088682	0.052989487	0.000597389	-2.637270128	0.051546518	0.000951445	-2.405470788	0.031187076	0.02111271	2.056317833	0.398370966	0.002630632	-1.017765422	0.680744105	0.063208935	5.934056631	4.69E-57	0.001911793	-0.86839744	1	0	-2.91905163	0.163268019	0.001199904	-1.563764545	0.354052652	0	1.105574442	1	0.010814733	1.652006955	1	0	3.217432252	1
ENSBTAG00000004464	C19H17orf53	0.009252045	-1.838438647	0.000131851	0.041792797	0.492089456	0.46236096	0.008843443	-1.912625728	2.05E-05	0.044197906	0.578806859	0.323676112	0.03166162	0.028182291	1	0.048047955	0.71332526	0.271076246	0.091488411	1.650233618	0.250416637	0.011399407	-1.423849637	0.102936801	0.047971066	0.696046954	0.104728524	0.042059446	0.486482682	0.994129097	0.045896655	0.604283861	0.926294955	0.005999521	-2.189161911	0.016643128	0.059863098	1.225868676	1	0.010814733	-0.56798697	1	0	1.006180389	1
ENSBTAG00000044138	METTL23	0.035686459	1.377889948	0.000137958	0.013930932	-0.241500904	1	0.021055816	0.43836823	0.517519452	0.011156753	-0.573774353	0.69886088	0.010753003	-0.587568725	1	0.012844503	-0.347985294	1	0.01407514	0.344562802	1	0.02806008	0.875762032	0.252078344	0.003386193	-2.175628949	0.000809608	0.013382551	-0.11926503	1	0.007649442	-0.984146659	0.926294955	0.017998562	0.223461036	0.99616474	0.014965774	0.837923409	1	0.032444199	1.382463441	1	0	1.945179317	1
ENSBTAG00000007173	PDGFRA	0.191208928	-1.395339947	0.000140051	0.180725611	-1.502653614	5.42E-06	0.137283921	-1.899574131	1.92E-08	0.330840634	-0.552299589	0.422693541	0.326771817	-0.553323409	0.940660702	0.180774485	-1.470711983	0.000327518	2.266097573	2.316660754	0.037509759	0.396348623	-0.247372646	1	2.357354642	3.111807309	1.42E-44	0.745599274	0.70162622	0.951640972	0.403508088	-0.218952935	1	0.154787637	-1.62606094	0.019136102	0.359178586	-0.341292538	1	0.248738862	-0.865057095	1	0.407250215	-0.068864006	0.724684135
ENSBTAG00000030670	PCNT	0.312807233	-1.347726472	0.000143256	1.361466268	1.092710234	1.56E-05	0.354158826	-1.163730089	0.000526065	1.242690631	0.893361727	0.002722496	0.476119082	-0.68233085	0.58505238	0.712632049	-0.058919401	1	2.153496451	1.558170773	0.18149044	0.300768977	-1.347859985	0.024067143	0.827924171	0.181615975	0.813062348	0.787658721	0.095052313	1	0.750601538	0.023865327	1	0.358771345	-1.073378561	0.170929494	0.838083368	0.185942282	1	0.432589326	-0.755749628	1	0.407250215	-0.732872077	0.731195986
ENSBTAG00000013125	PLAUR	0.38902646	-1.357205681	0.000146765	0.437506583	-1.197412258	0.000211655	0.240457419	-2.086090671	2.91E-10	0.856066233	-0.126208596	1	1.17147995	0.378560204	1	0.546604956	-0.829516551	0.11303932	3.828438136	2.076531238	0.06465764	1.02156227	0.15317316	1	3.501887852	2.406251365	5.27E-25	0.630891694	-0.563047885	1	1.302317573	0.528177906	0.925223674	0.169186487	-2.495051795	0.00010125	0.389110135	-1.218899755	1	0.994955449	0.106089654	1	1.357500718	0.529895701	0.724684135
ENSBTAG00000010787	RFC3	0.570983344	-1.285771643	0.000156149	1.669829341	0.436361558	0.38490594	0.49902284	-1.495874567	1.75E-06	1.756759477	0.51377932	0.262198233	1.514978661	0.250323031	1	2.065586354	0.784424492	0.036643668	0.795245422	-0.704661117	1	0.570847242	-1.230919018	0.043733243	1.575144076	0.31507812	0.541031276	0.856483269	-0.609317977	1	2.179134911	0.80892115	0.276724745	0.325174028	-2.038307417	0.001171257	0.703391398	-0.873524584	1	1.384285842	0.092790108	1	2.104126113	0.65243273	0.724684135
ENSBTAG00000010543	FGFR4	1.479886614	1.039273013	0.000156742	1.312519748	0.847844391	0.002507315	0.552083496	-0.617665627	0.10609561	0.841905739	0.062645373	1	0.557363995	-0.582429913	0.742024739	1.058957905	0.441546623	0.82816572	1.463814581	0.858301806	0.437874879	0.422654948	-0.98105922	0.171225848	0.132061524	-2.731274246	2.98E-12	1.061045121	0.400974878	0.97572615	0.327013664	-1.355924237	0.091188137	0.197984187	-2.075626835	0.001127987	1.466645893	0.852852411	1	0.659698722	-0.290492885	1	0.610875323	-0.351067637	0.724684135
ENSBTAG00000002882	LMNB1	1.022571251	-1.276710892	0.000169033	4.310682329	1.122910763	4.84E-06	1.239345331	-0.986725327	0.002521093	3.420832083	0.670715016	0.058414074	1.817257526	-0.37189418	1	2.736830561	0.281920665	1	2.125346171	-0.122672303	0.996542009	0.588384792	-2.035340016	0.000111308	2.483772512	0.119459971	0.926576021	2.219591686	-0.056893204	1	3.010055595	0.410615145	1	0.401967894	-2.569975409	3.53E-05	2.289763487	-0.021045976	1	1.892578299	-0.292382677	1	2.6471264	0.142195852	0.724684135
ENSBTAG00000013476	CPA5	0.082827831	1.163678159	0.000181235	0.072290244	0.942975187	0.003385725	0.053060656	0.379061516	0.453131695	0.022742612	-0.96990339	0.066878025	0.016726894	-1.380930375	0.03577437	0.059941013	0.57829122	0.559552297	0.049262991	0.393950829	0.826388303	0.007891897	-2.354611066	0.001006514	0.008465482	-2.352821951	2.66E-06	0.045883032	0.16646618	1	0.014342705	-1.533308438	0.154032526	0.021598275	-0.935786832	0.392764017	0.044897323	0.469730773	1	0.064888399	0.81774416	1	0	0.576241961	1
ENSBTAG00000009363	GINS3	0.0383299	-1.472227975	0.000190045	0.117095135	0.284920512	0.811219478	0.03200484	-1.747835193	1.69E-06	0.111567529	0.198512894	1	0.118283034	0.286067895	1	0.182201652	1.03706551	0.001871365	0.211127103	1.138111924	0.35061815	0.042090119	-1.261428237	0.074659998	0.124724773	0.373450297	0.442008276	0.107060409	0.134941906	1	0.177849536	0.915501022	0.163347082	0.022798179	-2.100203038	0.004098671	0.044897323	-0.753936452	1	0.118962065	0.37244736	1	0	-0.644370454	1
ENSBTAG00000016026	PCOLCE2	0.252889228	-1.329330322	0.000206724	0.300456328	-1.084297547	0.001505217	0.167183179	-1.958046838	2.66E-09	0.574143669	-0.045883514	1	0.795124841	0.478229479	0.814737524	0.377247807	-0.708791464	0.336565212	1.569378133	1.424389928	0.218551182	0.750607127	0.371440361	0.664353991	1.925615044	2.08546232	5.46E-18	0.680598312	0.212158728	1	0.97721627	0.782516736	0.348025219	0.081593483	-2.892129139	7.80E-06	0.419041684	-0.467347383	1	0.410959859	-0.503347348	1	0.610875323	0.106015656	0.724684135
ENSBTAG00000009772	LIX1	0.333073617	1.039813142	0.000206724	0.226283525	0.369089079	0.571116747	0.106963545	-0.848602501	0.024531644	0.21455294	0.271255986	0.867133829	0.207294004	0.205875826	1	0.195046155	0.110889936	1	0.105563552	-0.711553803	1	0.204312454	0.178615609	0.952849482	0.021445889	-3.177729247	2.28E-13	0.172061371	-0.074315663	1	0.147251767	-0.31796142	1	0.034797221	-2.396353681	0.000413401	0.299315488	0.765789683	1	0.216294663	0.301081638	1	0.475125251	1.479911882	0.724684135
ENSBTAG00000036028	BEX2	1.257837536	1.02542872	0.000214544	0.367475409	-1.022787437	0.002066308	0.474598093	-0.61151893	0.111690463	0.819592233	0.276574228	0.868665655	1.047820415	0.666641262	0.271221759	0.461450659	-0.647128772	0.398451064	0.372991215	-0.884310691	1	1.753754969	1.484154083	1.43E-05	0.142220103	-2.395427061	5.04E-10	0.825894581	0.259001337	1	0.365260876	-0.963166503	0.491834374	0.454763678	-0.630702146	0.594649675	0.853049142	0.302161013	1	0.616439789	-0.162547031	1	0.746625395	0.135965885	0.724684135
ENSBTAG00000005278	WEE1	0.152879028	-1.345178742	0.000219359	0.489088684	0.523336101	0.215409073	0.122123733	-1.689974447	4.12E-07	0.502482987	0.55800883	0.203456799	0.353654325	-0.031622043	1	0.56373096	0.746988541	0.073633703	1.175274207	1.725437914	0.140477677	0.145561662	-1.357473493	0.026903323	0.405778786	0.187643913	0.757437858	0.541037422	0.605857569	0.954409037	0.501038479	0.506494598	0.897344209	0.093592525	-1.979651188	0.002681441	0.419041684	0.244456264	1	0.270368328	-0.378424941	1	0.067875036	-1.507343933	0.973213938
ENSBTAG00000008170	POLA1	0.378893268	-1.304818367	0.000226742	1.330215798	0.741297111	0.014201362	0.312047194	-1.604487815	6.90E-07	1.431068113	0.853314174	0.004971332	0.809462179	-0.113918469	1	0.97618222	0.187728281	1	1.731242245	0.998839524	0.370036215	0.443700007	-1.014602722	0.142874159	1.106720722	0.38753971	0.397872716	0.829718167	-0.070115134	1	1.22964787	0.533566776	0.904015982	0.167986583	-2.41685517	0.000123442	1.017672661	0.226288308	1	0.454218792	-0.922950987	1	0.543000287	-0.605689985	0.724684135
ENSBTAG00000015804	SIGMAR1	0.320296984	-1.30963745	0.000229011	0.685627786	-0.122751699	1	0.366371199	-1.10952518	0.000977067	0.573714563	-0.407231754	0.662531072	0.564532664	-0.418506457	1	0.897688035	0.321642471	1	1.090823366	0.567815073	0.592445941	0.255171348	-1.587658704	0.004775491	2.184094438	1.888418228	1.59E-14	1.40325607	0.963232108	0.951640972	1.047017432	0.539792823	0.895734113	0.223182174	-1.765010917	0.006498577	1.242159277	0.750215278	1	0.475848258	-0.618979048	1	0.475125251	-0.538071654	0.724684135
ENSBTAG00000012212	CYP26B1	0.012776633	-2.331413311	0.000234104	0.009789304	-2.747503222	1.78E-06	0.006316745	-3.330492764	6.90E-08	0.015447812	-2.063025654	0.001273189	0.026285119	-1.237477585	0.487994215	0.00808728	-2.958780088	3.63E-05	0.387066356	2.763569203	0.071908908	0.030690712	-0.974199384	0.654445902	0.423838481	4.220006019	1.38E-40	0.116619374	1.016208598	0.951640972	0.034422491	-0.800972618	1	0.009599233	-2.532359408	0.054883702	0.149657744	1.440168949	1	0.20547993	1.84945302	1	0.067875036	1.081190377	0.724684135
ENSBTAG00000018920	TRIM47	0.117633143	-1.380583599	0.000234104	0.213482128	-0.470600277	0.532256474	0.056850703	-2.469887908	2.93E-12	0.293079317	0.049357705	1	0.227605233	-0.347535785	1	0.127969307	-1.244254517	0.005010353	0.872658693	1.640099398	0.171795595	0.184144272	-0.655049203	0.5625347	1.244425901	2.740416723	4.84E-32	0.284857159	0.007787529	1	0.289722632	0.030161178	1	0.073194154	-1.98608908	0.003780362	0.149657744	-0.814039005	1	0.486662991	0.794747128	1	0.678750359	1.297818805	0.724684135
ENSBTAG00000017743	XIRP2	0.003084015	-3.084142705	0.000237077	0.004141629	-2.747825792	0.000258583	0.042532748	0.813877365	0.182250139	0.002145529	-3.548188943	3.27E-05	0.000597389	-4.611884809	0.000183584	0.005708668	-2.244189881	0.028859465	0.190014393	2.942464358	0.092638857	0	-5.017765422	0.001584053	0.001693096	-3.696336908	0.000126737	0.009558965	-1.246622274	1	0	-4.885368504	0.011511617	0.399568086	5.379955891	8.42E-36	0	-0.860742431	1	0.021629466	0.265203137	1	0	1.251115379	1
ENSBTAG00000020451	USP1	1.085573271	-1.251914912	0.000237077	3.406677763	0.60169332	0.082653685	0.884344273	-1.568676327	4.86E-07	3.825908035	0.792272652	0.011611514	2.365063296	-0.027939451	1	3.288668463	0.517277807	0.510785571	1.871993647	-0.369464982	1	1.304793697	-0.924883348	0.15155463	2.699360128	0.183307328	0.802507593	3.08563392	0.368324237	1	3.226152344	0.450782948	1	0.620350452	-2.002920584	0.001357649	2.60404475	0.101078977	1	1.795245701	-0.431388736	1	2.239876185	-0.155261474	0.724684135
ENSBTAG00000011002	CCDC136	0.021147531	-1.711437412	0.00023853	0.012801397	-2.474019178	6.88E-09	0.011791257	-2.566499429	8.80E-09	0.029608306	-1.21432918	0.016886294	0.047791125	-0.457369667	1	0.01427167	-2.268657906	1.10E-05	0.647456449	3.428078255	0.000407932	0.082426484	0.387222842	0.752100538	0.349906602	3.302508865	1.24E-37	0.118531167	0.926584379	0.951640972	0.046852835	-0.462280993	1	0.022798179	-1.476161901	0.128545503	0.044897323	-0.136500345	1	0.032444199	-0.601208389	1	0.067875036	0.973013525	0.724684135
ENSBTAG00000004796	GRP	0.004405736	-2.556911101	0.00024215	0.004141629	-2.688569207	2.08E-05	0.005895628	-2.171515646	0.000614008	0.011156753	-1.255598393	0.143718913	0.009558225	-1.421223081	0.347384544	0.005232946	-2.303316244	0.004060755	0.190014393	3.003734501	0.050327825	0.008768775	-1.470515924	0.337272856	0.183983149	4.297099493	1.68E-39	0.036324067	0.591313798	0.985801469	0.009561803	-1.338119007	0.883014864	0.002399808	-2.892387293	0.039232051	0.029931549	0.788092253	1	0.032444199	0.741393274	1	0	1.309062728	1
ENSBTAG00000012109	EDN3	0.039211048	1.433862679	0.000242176	0.019578608	0.20757596	1	0.001263349	-3.564702424	1.67E-07	0.033041153	1.11543811	0.015077357	0.01254517	-0.461232003	1	0.017126004	-0.004981598	1	0.01407514	0.250586653	0.979090039	0.019291305	0.204462374	1	0.005643655	-1.601061619	0.021357068	0.013382551	-0.214722189	1	0.009561803	-0.781548107	1	0.001199904	-2.936241582	0.022573871	0.044897323	1.752902824	1	0.010814733	0.279529918	1	0	1.85178278	1
ENSBTAG00000002260	NCAPD3	0.177991721	-1.328102891	0.000242356	0.742481051	1.033998916	7.80E-05	0.184448948	-1.279443727	0.000143651	0.732054633	0.978830059	0.000690949	0.288538917	-0.566326131	0.883471947	0.470489384	0.203461416	1	1.090823366	1.408935678	0.226241538	0.127147235	-1.762583661	0.001777504	0.463908431	0.17677791	0.776914864	0.330740191	-0.33234454	1	0.462791267	0.166204809	1	0.110391183	-1.946515847	0.003039577	0.284349714	-0.496670454	1	0.237924129	-0.759196257	1	0.543000287	0.46117532	0.724684135
ENSBTAG00000003721	CHST1	0.037889327	-1.449787731	0.000243374	0.05572373	-0.881883989	0.03615335	0.037479353	-1.472596956	5.73E-05	0.243303035	1.675860704	2.01E-11	0.098569195	0.038190125	1	0.041387843	-1.307434703	0.004876885	0.140751402	0.606804736	0.636161795	0.213081229	1.25960491	0.001239474	0.057000914	-0.808643579	0.102242983	0.147208062	0.643597189	0.954409037	0.066932621	-0.537285195	1	0.212383037	1.222756423	0.005234949	0.104760421	0.287164332	1	0.032444199	-1.18068684	1	0	-0.606473846	1
ENSBTAG00000030190	COL6A3	0.011895486	-1.913600508	0.000250868	0.014683956	-1.636840924	0.000675552	0.005895628	-2.912129017	1.81E-08	0.048059859	0.222650256	1	0.03166162	-0.427661425	1	0.013795948	-1.685313482	0.006237469	0.394103926	3.327145749	0.002690168	0.050858894	0.306667855	0.888049551	0.195834824	2.884395822	2.07E-23	0.030588688	-0.395416186	1	0.045896655	0.151971989	1	0.007199425	-2.389038558	0.018755907	0	-1.526693773	1	0	-1.991401818	1	0	0.585164037	1
ENSBTAG00000010578	IL17B	0.026434414	-1.662496841	0.000253209	0.024849771	-1.781272275	1.54E-05	0.11791257	0.708749135	0.051127258	0.009011224	-3.215990184	1.59E-11	0.010155614	-2.976736552	5.14E-07	0.022358949	-1.896321665	0.000186879	0.077413271	0.103465781	0.90410804	0.007891897	-3.235606751	1.46E-05	0.007336751	-3.433384123	3.80E-10	0.036324067	-1.053895245	0.971074806	0.003824721	-4.108085455	5.32E-06	1.113511063	5.182876185	4.89E-76	0.089794647	0.403915717	1	0.043258933	-0.548167427	1	0	-0.297418335	1
ENSBTAG00000021204	TES	0.151997881	-1.316792483	0.000254893	0.28313679	-0.359792605	0.738782865	0.112016941	-1.78270784	6.25E-08	0.451419387	0.415476406	0.529949708	0.338122209	-0.063800448	1	0.283530508	-0.346747005	1	0.274465234	-0.336756711	1	0.347243484	-0.020424083	1	1.033353208	1.87063669	5.84E-14	0.449271358	0.364808387	0.986677003	0.508687921	0.56838375	0.738307166	0.055195591	-2.700121124	3.30E-05	0.329247037	-0.055854921	1	0.259553595	-0.399837239	1	0.475125251	0.529208847	0.724684135
ENSBTAG00000049122	COL6A5	0.072694639	1.270878833	0.000261142	0.04894652	0.572928362	0.355532446	0.046743912	0.483265609	0.353265054	0.030037412	-0.245003926	1	0.018519061	-0.95247236	0.554347561	0.02854334	-0.319439215	1	0.119638692	1.857375517	0.207290757	0.018414427	-0.91837727	0.491568136	0.005643655	-2.629630771	8.41E-06	0.024853309	-0.416137477	1	0.007649442	-2.103969346	0.068817975	0.040796742	0.257073606	0.915664005	0.014965774	-0.264375167	1	0.010814733	-0.729083212	1	0	0.845337371	1
ENSBTAG00000001615	RUNDC3A	0.076659801	1.148383127	0.000277001	0.015436979	-1.467184606	0.000436333	0.013475722	-1.647106058	8.66E-05	0.049347176	0.372814654	0.747481506	0.068102353	0.890772251	0.087365047	0.018077449	-1.194879031	0.042681396	0.02111271	-0.513418194	1	0.15696107	2.287846679	9.11E-12	0.009029848	-2.162064221	1.73E-05	0.032500481	-0.218626643	1	0.016255065	-1.258140276	0.392427535	0.005999521	-2.522163641	0.003615615	0.044897323	0.569521542	1	0.021629466	-0.312136123	1	0	0.675650576	1
ENSBTAG00000006707	ACSL5	0.091639302	-1.351730481	0.000279932	0.103917226	-1.180434678	0.000675552	0.04927061	-2.283584067	5.65E-11	0.190523011	-0.215554162	1	0.186385387	-0.241034888	1	0.11845486	-0.95316738	0.067650546	0.457442057	1.094336172	0.351673557	0.185021149	-0.243674786	1	1.07060133	3.038357661	1.39E-41	0.217944403	0.010682176	1	0.192192241	-0.184647575	1	0.026397892	-3.039153738	1.01E-05	0.164623519	-0.301115714	1	0.183850463	-0.178766854	1	0.135750072	-0.19239382	0.73462635
ENSBTAG00000018864	CENPU	0.16301222	-1.305779816	0.000282194	0.560249393	0.699130478	0.029094236	0.147390712	-1.464168911	8.88E-06	0.617054257	0.854102852	0.005685685	0.37575772	0.003837142	1	0.529478953	0.573157941	0.36935145	0.168901682	-1.108600176	1	0.15345356	-1.336178025	0.02699561	0.397877669	0.094930182	0.927594781	0.307798675	-0.286744823	1	0.557453117	0.613660642	0.630762833	0.049196071	-2.954229512	6.04E-06	0.26938394	-0.42280453	1	0.465033525	0.32906252	1	0.271500144	-0.239778126	0.724684135
ENSBTAG00000010444	ERBB3	0.006608604	-2.151649524	0.000287324	0.011671862	-1.367208097	0.017754454	0.018950234	-0.617385752	0.431885263	0.006007482	-2.290765247	0.000105328	0.007168669	-1.969997274	0.018912249	0.008563002	-1.770411772	0.012917243	0.126676262	2.265024037	0.140477677	0.001753755	-3.515580597	0.000713667	0.003386193	-2.96953834	1.39E-05	0.032500481	0.282087681	1	0.001912361	-3.383183679	0.006719894	0.419966457	5.332934322	2.65E-58	0.059863098	1.38378116	1	0.032444199	0.594455933	1	0.135750072	2.753300204	0.724684135
ENSBTAG00000002002	ATAD2	0.115430275	-1.325966708	0.000287324	0.362204245	0.51022008	0.244721044	0.117491453	-1.304743811	0.000118386	0.391773669	0.634970122	0.104774381	0.274798968	0.033064338	1	0.411975537	0.711124868	0.090046451	0.450404487	0.760454219	0.501321694	0.119255338	-1.217317615	0.059823727	0.299113709	0.16863898	0.79272433	0.172061371	-0.648869783	1	0.453229464	0.809914719	0.246940918	0.082793387	-1.728746065	0.010166431	0.164623519	-0.609023339	1	0.118962065	-1.073731383	1	0.203625108	-0.084380481	0.724684135
ENSBTAG00000012074	MYB	0.028637282	-1.467686574	0.000287491	0.033886052	-1.237488957	0.001106469	0.018529118	-2.116716628	2.57E-08	0.105560047	0.601041532	0.177453886	0.142775986	1.08363103	0.004123092	0.115124804	0.740853854	0.106521741	0.063338131	-0.088396606	1	0.077165219	0.074876052	1	0.071674417	-0.044872257	1	0.089854272	0.312050548	1	0.186455159	1.467727609	0.000534971	0.013198946	-2.420845423	0.001305852	0.074828872	0.253473138	1	0.043258933	-0.475293591	1	0	-0.224745685	1
ENSBTAG00000019777	CDCA3	0.622971025	-1.24140501	0.000292114	2.982725601	1.424731832	4.42E-10	0.692736347	-1.083876665	0.000798714	2.670755003	1.16500299	7.18E-06	0.832162963	-0.774769276	0.294641306	1.105578693	-0.345789122	1	1.111936076	-0.306172861	1	0.328829057	-2.126440494	5.57E-05	1.318922145	-0.062720542	1	1.200606011	-0.197954328	1	1.220086067	-0.178692789	1	0.241180737	-2.555992582	4.32E-05	1.361885472	-0.016272627	1	1.211250112	-0.183199195	1	1.221750646	-0.184089882	0.724684135
ENSBTAG00000019665	IL1RN	0.01233606	-1.696286769	0.000296278	0.017696049	-1.189467443	0.008674303	0.008422326	-2.25267279	4.32E-07	0.064794988	0.931843724	0.011076167	0.080647523	1.264203276	0.001288297	0.018553171	-1.084246963	0.106819782	0.02815028	-0.120909419	1	0.093825891	1.461364167	0.000467855	0.02370335	-0.699323511	0.272577455	0.055441997	0.613008869	0.960297367	0.096574211	1.497292066	0.00178143	0.013198946	-1.441280539	0.124253493	0.029931549	0.22105166	1	0.054073666	0.762367403	1	0	0.743945039	1
ENSBTAG00000012219	CSPG4	0.1383401	-1.393696722	0.000306592	0.125754904	-1.560369192	6.30E-06	0.056850703	-2.721273798	1.32E-13	0.304665176	-0.165821305	1	0.31840837	-0.090133492	1	0.158891258	-1.17511623	0.013508448	3.44137178	3.446122061	2.01E-05	0.321814037	-0.070382769	1	1.287317678	2.42272936	3.97E-23	0.596479419	0.854947826	0.951640972	0.461835087	0.485203754	0.967482902	0.075593962	-2.188028696	0.001837297	0.50883633	0.61517358	1	0.324441994	-0.025523702	1	0.407250215	0.398797406	0.724684135
ENSBTAG00000007705	COLEC12	0.031280723	-1.515406519	0.000306592	0.079820478	-0.070383373	1	0.023161398	-1.967270572	4.37E-07	0.055783765	-0.638054315	0.37354323	0.049583292	-0.792146163	0.549740329	0.094668744	0.210479405	1	0.246314954	1.611301176	0.210824208	0.018414427	-2.18619796	0.001024834	0.333540003	2.527471751	1.87E-23	0.126178339	0.634325479	0.954409037	0.087968588	0.092690326	1	0.016798658	-2.268613639	0.003622803	0.13469197	0.822336466	1	0.118962065	0.622487869	1	0.067875036	0.604989015	0.725701688
ENSBTAG00000020747	ASS1	0.477141174	1.023425734	0.000330233	0.364839827	0.561736227	0.156117538	0.244247466	-0.123937495	1	0.211120093	-0.358269841	0.845005253	0.1911645	-0.498365351	1	0.340141465	0.421249884	0.852769175	0.119638692	-1.073938553	1	0.199051189	-0.423204914	0.8470258	0.04627797	-2.611161152	1.19E-10	0.19691468	-0.420586486	1	0.196973143	-0.436516943	1	0.214782845	-0.302071558	1	0.254418165	0.009001183	1	0.291997795	0.184609027	1	0.203625108	-0.05309669	0.724684135
ENSBTAG00000007531	NCF4	0.05066596	1.211123623	0.000339385	0.0289914	0.237290626	0.965250024	0.024845863	-0.017482017	1	0.016735129	-0.637708659	0.524280277	0.020908617	-0.269899062	1	0.026164728	0.068728783	1	0.01407514	-0.285914358	1	0.016660672	-0.571338785	0.79550135	0.015802234	-0.69426669	0.30714089	0.021029723	-0.160950933	1	0.018167426	-0.438941867	1	0.020398371	-0.252977008	1	0.044897323	1.215052919	1	0.054073666	1.341306116	1	0	1.317959128	1
ENSBTAG00000000079	CCSAP	0.053749975	-1.363403425	0.000350487	0.205198871	0.814695775	0.006253948	0.040848283	-1.780746398	3.97E-07	0.266045646	1.27500684	1.19E-06	0.123659536	-0.062594266	1	0.124163528	-0.058985959	1	0.147788972	0.252951728	0.837723416	0.085057116	-0.62016414	0.605512742	0.11625929	-0.160341971	0.968678953	0.154855234	0.28484882	1	0.137689964	0.106428795	1	0.045596358	-1.508522435	0.038743348	0.104760421	-0.131801008	1	0.118962065	-0.009191131	1	0.067875036	-0.023469135	0.793518361
ENSBTAG00000017348	FGF5	0.022909826	-1.50649653	0.000351632	0.015436979	-2.116511041	2.88E-08	0.017265769	-1.930487782	8.51E-07	0.050205388	-0.308139531	0.968006287	0.119477812	1.112119482	0.004147261	0.050426567	-0.296090215	1	0.084450841	0.575517236	0.678458113	0.092072136	0.650352846	0.327511927	0.154071778	1.582553131	2.54E-08	0.07647172	0.3659555	1	0.153945029	1.473060295	0.000809797	0.001199904	-4.736172671	7.86E-07	0.059863098	0.26996126	1	0.097332598	0.811485169	1	0.067875036	1.056164684	0.724684135
ENSBTAG00000001687	STC1	0.013657781	-1.679625402	0.000386306	0.018825584	-1.230737915	0.006551775	0.012212373	-1.850728473	2.35E-05	0.033899365	-0.306450576	0.996485574	0.048985903	0.285472186	1	0.027116173	-0.64617989	0.848899688	0.105563552	1.450677916	0.304829973	0.029813834	-0.458218431	0.882945618	0.156893606	2.413570545	1.59E-18	0.053530204	0.430955202	1	0.090837129	1.251567141	0.026804642	0.003599712	-3.169086134	0.000681884	0.074828872	1.100036259	1	0.010814733	-0.956985615	1	0	0.617748246	1
ENSBTAG00000005922	EFCC1	0.008811471	2.18937867	0.000410632	0.003012094	0.270676794	1	0.003368931	0.456700053	0.91170586	0.000858212	-1.274214071	0.540495481	0.001194778	-0.74152009	1	0.001902889	-0.312361384	1	0	1.290115018	1	0.004384387	0.941171922	0.772265411	0	-2.471084832	0.079460809	0	-0.612057687	1	0.002868541	0.430890841	1	0.001199904	-0.280457745	1	0	2.373054753	1	0	1.908346709	1	0	4.484912563	1
ENSBTAG00000049598	H2B	0.005727456	-1.922830834	0.000419809	0.029367912	0.574947671	0.367101514	0.008843443	-1.315193875	0.009095761	0.037332212	0.98781181	0.015294899	0.017324283	-0.273741129	1	0.042339287	1.197639059	0.003166276	0.01407514	-0.024671008	1	0.006138142	-1.665705355	0.074290963	0.016930965	-0.312747805	0.822948301	0.007647172	-1.182700516	0.958832293	0.03251013	0.697323823	0.872125784	0.008399329	-1.189161911	0.325515886	0	-0.533835842	1	0.021629466	0.593560683	1	0.067875036	2.581588583	0.724684135
ENSBTAG00000008056	GAD2	0.001762294	-2.917669129	0.000429182	0.00451814	-1.757395575	0.019721259	0.001684465	-2.99185621	8.77E-05	0.011585859	-0.351381932	1	0.01254517	-0.200034255	1	0.002854334	-2.296820533	0.015530529	0.00703757	-0.094548833	1	0.004384387	-1.563059307	0.376995875	0.095942133	3.881476223	4.48E-27	0.015294344	0.209467009	1	0.020079786	0.5293248	1	0.002399808	-2.10200111	0.214481159	0	-0.016715987	1	0.010814733	0.523682858	1	0	2.095141823	1
ENSBTAG00000045989	CDC42EP5	0.0383299	-1.424228618	0.000429182	0.032003494	-1.71925934	1.77E-06	0.013475722	-2.958248345	1.89E-13	0.063078565	-0.666959911	0.281164028	0.05734935	-0.786849978	0.507009425	0.027591895	-1.899767061	1.49E-05	0.133713832	0.543563375	0.669322383	0.089441503	-0.098302361	1	0.580732087	3.644772866	3.63E-59	0.191179301	1.043651289	0.951640972	0.041115753	-1.24138322	0.290322884	0.016798658	-2.472989399	0.000909518	0.164623519	0.883182021	1	0.075703132	-0.169655803	1	0	-0.59861601	1
ENSBTAG00000002742	MSH2	0.246280624	-1.263625604	0.000430991	0.731938724	0.489172257	0.269140995	0.260671002	-1.18222678	0.000397045	0.649237198	0.273716413	0.877652251	0.576480445	0.072636089	1	0.938124433	0.899781717	0.007859901	0.753020001	0.458232217	0.659708119	0.250786961	-1.180738194	0.063353934	0.593712493	0.120132688	0.929391574	0.325004812	-0.772193401	0.984104183	1.033630908	0.983281977	0.079664294	0.172786199	-1.70913476	0.008890372	0.254418165	-1.056244352	1	0.529921924	-0.042605495	1	0.610875323	0.206514732	0.724684135
ENSBTAG00000000357	PRAG1	0.011895486	-1.732287279	0.000452881	0.018825584	-1.078300341	0.031281808	0.034952655	-0.098841765	1	0.009440329	-2.069803125	2.30E-05	0.017921672	-1.089699077	0.278692178	0.026164728	-0.547213022	1	0.098525981	1.500682003	0.301447328	0.014906917	-1.304170579	0.168054498	0.103278884	1.754796575	1.48E-08	0.047794825	0.414909361	1	0.020079786	-0.873963741	0.961938634	0.218382558	2.907880113	7.27E-16	0.044897323	0.654236506	1	0.010814733	-0.814524056	1	0	0.760019801	1
ENSBTAG00000047468	FAM78B	0.011895486	1.991439292	0.000467401	0.001882558	-1.000177116	0.651719404	0.00800121	1.225374506	0.073575483	0.000858212	-1.840560894	0.192967698	0.002389556	-0.532933468	1	0.002854334	-0.372902926	1	0.00703757	1.759600301	0.795658762	0.001753755	-0.710904775	0.899277314	0.002821827	-0.340688195	0.920914371	0	-1.160950933	1	0	-2.200464566	0.677600846	0.008399329	1.277537709	0.337075234	0	1.824161507	1	0	1.359453463	1	0	3.936019317	1
ENSBTAG00000013004	ITIH5	1.686075043	0.981356838	0.000487146	1.145348558	0.313044838	0.713485349	0.894451065	-0.104092447	0.993985407	0.948323997	-0.008164942	1	0.85307158	-0.174281018	1	1.012812839	0.098978167	1	2.653163929	1.490251266	0.196114893	0.895291912	-0.095633374	1	0.134883352	-2.937462205	8.82E-14	1.038103605	0.126840915	1	0.564146379	-0.789263873	0.784968038	0.550756011	-0.817367413	0.378252072	1.092501533	0.195927066	1	0.821919719	-0.211208293	1	0.407250215	-1.099652315	0.763779627
ENSBTAG00000008088	KIF18B	0	-4.04621325	0.00049495	0.015436979	1.676781169	0.000489493	0.000842233	-2.511591088	0.004845842	0.014160494	1.452992557	0.010770868	0.001792167	-1.520860636	0.544740284	0.009038724	0.644994279	1	0.02111271	2.150184756	0.390132021	0	-2.959818072	0.086458749	0.005643655	-0.064120633	1	0.003823586	-0.179098279	1	0.004780902	-0.182086036	1	0.002399808	-0.874465385	0.76525099	0.014965774	2.209079018	1	0	0.732496873	1	0	3.309062728	1
ENSBTAG00000003515	SNCG	0.210594165	1.034353566	0.000498733	0.137050255	0.289792491	0.80199952	0.082117683	-0.547932935	0.273097234	0.118433223	0.041367884	1	0.114101311	-0.01692834	1	0.151279701	0.445100617	0.852992294	0.042225421	-1.250274447	1	0.137669765	0.274700013	0.850167474	0.012980406	-3.222670216	5.34E-12	0.089854272	-0.347686833	1	0.067888802	-0.786103277	0.906814773	0.074394058	-0.640673501	0.644308473	0.119726195	0.196548103	1	0.075703132	-0.43874146	1	0.067875036	0.133891557	0.766058616
ENSBTAG00000014762	ISG20	0.002643441	-2.400878131	0.000501543	0.003388605	-2.130573753	0.000627125	0.002947814	-2.277125834	0.000333358	0.012444071	-0.217630543	1	0.017324283	0.315063438	1	0.003330056	-2.07789613	0.008427744	0.063338131	2.290115018	0.180295782	0.007891897	-0.783968237	0.749392488	0.079011168	3.30441295	9.44E-25	0.013382551	0.055366974	1	0.021992147	0.688278683	1	0.002399808	-2.081316955	0.107522792	0	0.003820944	1	0.010814733	0.544293138	1	0	2.115678754	1
ENSBTAG00000021302	CHAD	0.030399576	1.413894263	0.00050503	0.013177909	-0.038651264	1	0.017265769	0.408238564	0.635901425	0.0072948	-0.931326358	0.340534315	0.00657128	-1.018360295	0.745920925	0.011417336	-0.247443907	1	0.02111271	1.022634707	0.693507984	0.004384387	-1.45534549	0.291008913	0.006772386	-0.987301166	0.222995808	0.009558965	-0.283434939	1	0.006693262	-0.896683817	1	0.035997125	1.537472876	0.013444336	0	0.089023266	1	0.021629466	1.220290715	1	0.067875036	3.206377064	0.724684135
ENSBTAG00000014567	MYLK	0.098688479	1.07625346	0.000506054	0.033886052	-0.716514552	0.181715427	0.02400363	-1.231038921	0.002045053	0.090541341	0.923525169	0.005990161	0.059141517	0.183342267	1	0.017126004	-1.711717261	0.000334628	0.042225421	-0.122057148	1	0.113994073	1.219707421	0.004047438	0.049664163	-0.09221294	1	0.065000962	0.338422178	1	0.015298885	-1.769222908	0.048330688	0.01439885	-1.817881857	0.024650858	0.074828872	0.737056788	1	0.032444199	-0.315476248	1	0	0.256806491	1
ENSBTAG00000000898	F2RL2	0.007930324	-1.810062904	0.00051581	0.002635582	-3.350100841	1.86E-10	0.001263349	-4.17550493	7.94E-12	0.012444071	-1.161739342	0.046331519	0.013142559	-1.033218254	0.40053091	0.008563002	-1.685020281	0.005271781	0.091488411	1.8952554	0.199388001	0.02455257	-0.083989076	1	0.181161322	4.052477124	2.28E-55	0.051618411	1.034305359	0.951640972	0.015298885	-0.757588208	1	0.003599712	-2.538379227	0.009789994	0.029931549	0.724220069	1	0.021629466	0.259512025	1	0	1.245446629	1
ENSBTAG00000040490	CCDC3	0.022028678	-1.569755043	0.00051581	0.02673233	-1.30510906	0.00208495	0.08127545	0.480991441	0.28056506	0.029608306	-1.131429508	0.023133725	0.034051177	-0.885704979	0.477337818	0.025689006	-1.330607093	0.015806579	0.105563552	0.873825722	0.516237128	0.049982017	-0.288742841	1	0.023138985	-1.462151707	0.003021685	0.047794825	-0.315340154	1	0.03251013	-0.914605725	0.862877394	0.585553231	3.971762429	2.13E-39	0.089794647	0.752902824	1	0.064888399	0.28819478	1	0.067875036	1.05121122	0.724684135
ENSBTAG00000010667	PIK3IP1	0.029518429	1.571107493	0.00051581	0.005271164	-1.263211522	0.146737387	0.009685675	-0.339410112	0.878482261	0.009440329	-0.376641884	1	0.013142559	0.156052097	1	0.005708668	-1.097348493	0.700609929	0.02111271	1.180816375	0.644589323	0.02104506	0.886855	0.419232522	0.010722944	-0.155820468	1	0.028676895	1.354927256	0.951640972	0.006693262	-0.735887605	1	0.004799617	-1.08859019	0.6649642	0.014965774	1.251425309	1	0.021629466	1.377831992	1	0	2.357157016	1
ENSBTAG00000007581	ADORA2B	0.015860648	-1.581979579	0.00051581	0.037651169	-0.275895482	0.96681864	0.005895628	-2.997017915	1.08E-10	0.04891807	0.155371737	1	0.065712797	0.629214183	0.539853623	0.040436398	-0.151008322	1	0.077413271	0.9105762	0.523653442	0.037705732	-0.23320722	1	0.114566194	1.609714279	6.70E-08	0.065000962	0.592632733	0.960297367	0.081275326	0.942741149	0.228442456	0.01439885	-1.569773995	0.079695245	0.059863098	0.718551319	1	0.021629466	-0.486512909	1	0	0.501707806	1
ENSBTAG00000053933	ENSBTAG00000053933	0.015420075	2.273089376	0.000516507	0.00451814	0.039351248	1	0.00463228	0.09151876	1	0.002574635	-0.743699354	0.983021855	0.002986945	-0.450471308	1	0.003805779	-0.178060292	1	0.02111271	2.602059024	0.345889161	0.006138142	0.595879834	0.898640119	0	-3.208050426	0.04957931	0	-1.349023281	1	0	-2.388536914	0.953714849	0.002399808	-0.427006408	1	0	1.636089159	1	0	1.171381115	1	0	3.747946969	1
ENSBTAG00000007071	RAI14	0.136577806	-1.29285539	0.000516661	0.111823972	-1.617997178	8.01E-07	0.084223264	-2.024692104	2.65E-09	0.244590352	-0.391290091	0.770318864	0.274201579	-0.199986372	1	0.149376811	-1.148349602	0.01048049	0.943034394	1.619234903	0.172409148	0.474390719	0.655393674	0.241464596	1.396804582	2.80020826	1.21E-34	0.372799637	0.270202044	1	0.325101303	0.066506079	1	0.070794346	-2.166756338	0.001147839	0.284349714	-0.081023631	1	0.216294663	-0.475098546	1	0.203625108	-0.294989146	0.72492632
ENSBTAG00000030566	GLE1	0.084149551	-1.30571214	0.00052082	0.264311206	0.533836122	0.182735542	0.089697776	-1.214310764	0.000511167	0.269478493	0.555096586	0.194730715	0.170853272	-0.19669197	1	0.245472722	0.388776131	0.994142156	0.337803365	0.82682235	0.484459069	0.112240318	-0.818753379	0.363565117	0.283311475	0.617068662	0.083342601	0.168237785	-0.198420377	1	0.267730485	0.499650243	0.925223674	0.088792908	-1.14628943	0.151669289	0.179589293	-0.018675372	1	0.259553595	0.464740057	1	0.203625108	0.389222518	0.724684135
ENSBTAG00000011869	CSRP3	0.002202868	-2.896835625	0.000533547	0.00225907	-2.930275103	0.000109215	0.013896839	-0.340604891	0.907713523	0.000858212	-3.95315272	9.92E-06	0	-5.014060158	0.000124694	0.001427167	-3.365472721	0.000507319	0.02111271	0.669963088	0.766695354	0.001753755	-2.823496601	0.047818693	0.001128731	-3.510613196	0.000218509	0.003823586	-1.651586051	0.983404223	0.002868541	-2.271723249	0.394713866	0.320374411	6.426089059	2.11E-56	0	-0.26007503	1	0.054073666	1.881874497	1	0.067875036	2.856095773	0.724684135
ENSBTAG00000007694	ENSBTAG00000007694	0.012776633	1.791414684	0.000538732	0.00451814	-0.015096536	1	0.003368931	-0.429128928	0.792948035	0.004291059	-0.074344666	1	0.004779112	0.134491193	1	0.003805779	-0.229899224	1	0.00703757	1.521440564	0.862678294	0.002630632	-0.520933831	0.989042811	0.000564365	-2.239759286	0.039506168	0.005735379	0.650976719	1	0.00095618	-1.420245773	1	0.009599233	1.207996775	0.37057306	0	1.588783444	1	0	1.1240754	1	0	3.700641254	1
ENSBTAG00000024947	TCAM1	0.010573766	-1.77540047	0.000555999	0.02221419	-0.690382777	0.374157589	0.007158977	-2.339410112	1.54E-06	0.032182941	-0.093203694	1	0.02568773	-0.426354518	1	0.023310394	-0.592129806	1	0.147788972	2.193821357	0.120027172	0.01403004	-1.263545989	0.216442938	0.156893606	2.845681558	4.02E-24	0.040147653	0.291648653	1	0.041115753	0.303004538	1	0.002399808	-3.320721615	0.00135928	0.059863098	1.101142196	1	0.021629466	-0.104950114	1	0.067875036	1.884448969	0.724684135
ENSBTAG00000037558	GRO1	0.004846309	-2.577637323	0.000613077	0.00451814	-2.719640653	6.56E-05	0.004211163	-2.780079924	6.79E-05	0.004720165	-2.620898265	0.000478498	0.00657128	-2.088204284	0.0764719	0.003805779	-2.875790723	0.000826116	0.154826542	2.551756188	0.140477677	0.005261265	-2.282421745	0.103217729	0.230825484	4.929859768	4.05E-46	0.045883032	0.77545875	0.960297367	0.007649442	-1.782041251	0.639626982	0.002399808	-3.039037152	0.052506701	0.029931549	0.641442394	1	0.021629466	0.176734349	1	0.067875036	2.165658603	0.724684135
ENSBTAG00000007937	PRIM2	0.088995861	-1.277879644	0.000614933	0.247744691	0.354091103	0.601177442	0.072010891	-1.603389309	2.16E-06	0.323116728	0.80909681	0.010482514	0.198930558	-0.01712564	1	0.321588295	0.786413414	0.038384214	0.197051963	0.007786942	0.94776867	0.093825891	-1.139153148	0.094646141	0.238726601	0.274475782	0.595059115	0.135737304	-0.566062468	1	0.324145123	0.740392545	0.381774135	0.053995687	-1.917718583	0.004360105	0.089794647	-0.968208133	1	0.237924129	0.289328825	1	0.135750072	-0.080248296	0.728709933
ENSBTAG00000044000	PRIM1	0.00616803	-1.837941936	0.000627462	0.02221419	0.075877124	1	0.00463228	-2.244945428	1.09E-05	0.023171718	0.146889429	1	0.028674675	0.488821085	1	0.045193621	1.295321193	0.000695936	0.035187851	0.968186923	0.611530639	0.01052253	-0.965265637	0.432536866	0.029347005	0.527907347	0.346458749	0.011470758	-0.708026745	1	0.043984294	1.150110394	0.125278323	0.003599712	-2.221422274	0.026732484	0.014965774	0.451985223	1	0.032444199	0.994349227	1	0	1.560319966	1
ENSBTAG00000005269	CCNB2	0.592571449	-1.185367515	0.00064874	2.643488569	1.354770895	5.63E-09	0.584509453	-1.211439449	0.00014654	2.422302698	1.144326407	1.21E-05	0.935511271	-0.462433655	1	1.016142895	-0.342028815	1	1.724204675	0.454613252	0.652479959	0.315675894	-2.059113506	0.000105043	1.373101232	0.139726799	0.891666868	0.554419973	-1.202457295	0.951640972	1.147416364	-0.140242306	1	0.170386391	-2.931824764	3.42E-06	0.463939007	-1.417927199	1	1.265323777	0.005204317	1	2.036251077	0.648066607	0.724684135
ENSBTAG00000000281	MND1	0.438811273	-1.182709319	0.000671023	1.556875835	0.909775921	0.000715488	0.368055664	-1.455699887	6.55E-06	1.570098419	0.90060857	0.002081003	0.894291426	-0.061995424	1	1.013764284	0.140336031	1	0.513742617	-0.851779876	1	0.337597832	-1.517108155	0.007072797	1.205484682	0.41841459	0.337483808	0.621332729	-0.593914489	1	1.173233232	0.356807332	1	0.142788595	-2.748114557	1.28E-05	0.628562526	-0.554562449	1	0.984140716	0.082033629	1	1.221750646	0.376999599	0.724684135
ENSBTAG00000012818	PDLIM5	0.137458953	-1.254340617	0.000693007	0.25640446	-0.291013684	0.884380985	0.161287551	-1.014886813	0.00381824	0.34585934	0.204216361	0.975410295	0.381134222	0.352666484	1	0.256890058	-0.278909215	1	0.443366916	0.552398215	0.615381053	0.27533953	-0.158232889	1	0.577910259	1.055791176	0.000354393	0.164414199	-0.90106171	0.963013028	0.778330767	1.482801732	0.000124308	0.151187924	-1.040598807	0.203176277	0.164623519	-0.79265872	1	0.216294663	-0.447777223	1	0.475125251	0.733244535	0.724684135
ENSBTAG00000013210	ADAMTS4	0.020266384	-1.653644201	0.000693618	0.045934426	-0.421856433	0.815761399	0.005053396	-3.626214387	1.35E-12	0.1021272	0.928348763	0.018845203	0.063323241	0.104196859	1	0.023786116	-1.405470788	0.018534397	0.443366916	2.974881575	0.012305577	0.055243282	-0.099201679	1	0.178339494	1.909147116	4.43E-10	0.063089169	0.120462003	1	0.069801162	0.256131833	1	0.008399329	-2.695920504	0.003664666	0.074828872	0.56697261	1	0.032444199	-0.485242371	1	0	0.087515223	1
ENSBTAG00000015604	ZNF385A	0.2766802	0.979316471	0.000693755	0.116342112	-0.484885022	0.493535771	0.153286341	-0.033261435	1	0.12916087	-0.309963454	0.936532111	0.169658494	0.130031545	1	0.134629419	-0.239964094	1	0.168901682	0.157477249	0.870063773	0.215711861	0.500379765	0.480285959	0.106100712	-0.603103551	0.257676195	0.26000385	0.765128468	0.951640972	0.122391079	-0.365236826	1	0.081593483	-0.953787838	0.286496012	0.254418165	0.763078045	1	0.075703132	-0.876409295	1	0	-1.303231755	1
ENSBTAG00000009696	ACTN2	0.006608604	-2.159870031	0.000698313	0.009412792	-1.692054821	0.003988569	0.024845863	-0.201635635	0.985588652	0.002574635	-3.42016021	3.84E-07	0.001792167	-3.70285847	3.82E-05	0.009514447	-1.628783003	0.04658693	0.154826542	2.543424914	0.102112634	0.002630632	-3.105896332	0.004427829	0.003386193	-2.977620686	4.10E-05	0.007647172	-1.609383552	0.960297367	0.001912361	-3.3912061	0.01139076	0.449964061	5.609734139	8.30E-59	0.014965774	0.045793214	1	0	-1.421574177	1	0.067875036	2.157651024	0.724684135
ENSBTAG00000009868	VGF	0.002643441	-2.630049085	0.000698313	0.002635582	-2.693098865	0.000115947	0.001263349	-3.525053348	4.53E-06	0.012444071	-0.466165379	0.99472146	0.008960836	-0.906813643	1	0.003330056	-2.307845903	0.009795736	0.133713832	3.104835769	0.051332563	0.018414427	0.177685451	1	0.112873098	3.957574438	8.80E-30	0	-3.205898339	0.951640972	0.011474164	-0.490864848	1	0.003599712	-1.887927645	0.264927846	0.014965774	0.783646348	1	0.010814733	0.318938303	1	0.067875036	2.895504158	0.724684135
ENSBTAG00000007652	RFTN2	0.158606484	1.009691708	0.000703869	0.06250094	-0.559938034	0.378820746	0.064851913	-0.492854525	0.349995404	0.066511412	-0.451707326	0.67685112	0.111114366	0.372029679	1	0.0489994	-0.916615223	0.122344504	0.112601122	0.428561788	0.728396929	0.212204351	1.401876319	0.000151519	0.054179087	-0.749279685	0.140168988	0.061177376	-0.502774036	1	0.075538244	-0.223113304	1	0.092392621	0.082710715	1	0.104760421	0.416275282	1	0.086517865	0.122352779	1	0.135750072	1.108800576	0.724684135
ENSBTAG00000032531	MUSTN1	0.01233606	-1.781056873	0.000703869	0.011671862	-1.893355639	6.97E-05	0.057692936	0.626539831	0.160285632	0.005578376	-2.904051029	7.16E-08	0.004181723	-3.190192362	6.65E-06	0.010465891	-2.00214671	0.000699766	0.056300561	0.652685097	0.663803528	0.009645652	-2.000624289	0.024071092	0.010158579	-2.011301637	0.000468742	0.032500481	-0.232209616	1	0.005737082	-2.655382933	0.011727287	0.529157736	4.899974915	2.27E-55	0.13469197	1.889537516	1	0.162220997	2.114412302	1	0	0.662371237	1
ENSBTAG00000021378	S100A13	3.851494129	0.953037631	0.000727445	2.057259869	-0.120339778	1	2.309823018	0.072043987	1	1.892786041	-0.25306941	0.964748628	2.185249189	-0.018904684	1	1.902889317	-0.241488793	1	0.858583553	-1.369553818	1	3.306704994	0.626185637	0.297093783	0.851627521	-1.464452392	5.32E-05	2.183267619	-0.020136328	1	1.359688391	-0.733641241	0.743811749	2.236621359	0.016510232	1	2.60404475	0.223871103	1	3.147087344	0.501808934	1	2.443501292	0.089229412	0.724684135
ENSBTAG00000051298	PVR	0.305317482	-1.240357019	0.000741872	0.375382154	-0.939778451	0.007375973	1.773741942	1.782694752	6.69E-15	0.143321364	-2.376546291	9.10E-12	0.157113323	-2.195668368	5.19E-07	0.495226945	-0.486894167	0.904231005	2.111271031	1.668866311	0.151656415	0.088564626	-2.989196269	5.46E-08	0.309836653	-1.193639173	0.002876478	1.020897468	0.623730049	0.951640972	0.224702371	-1.631278633	0.022824538	4.116871181	2.998463215	4.81E-24	0.927878014	0.468257768	1	0.432589326	-0.618667553	1	0.543000287	-0.233341933	0.724684135
ENSBTAG00000009156	CAMK2N1	0.101772494	1.045537557	0.000781348	0.063630475	0.232804785	0.939953267	0.03200484	-0.866856366	0.042176373	0.05621287	0.02457036	1	0.048985903	-0.186168491	1	0.054708068	-0.018148667	1	0.01407514	-1.418521854	0.997440081	0.046474507	-0.251473156	1	0.038941219	-0.541110623	0.408725687	0.074559927	0.46757843	0.984104183	0.034422491	-0.688638646	1	0.046796262	-0.227788676	1	0.059863098	0.404110689	1	0.151406264	1.53807908	1	0	0.188591125	1
ENSBTAG00000008963	CIT	0.064764314	-1.296728919	0.000795456	0.337354473	1.514414686	1.46E-10	0.043796097	-1.889045404	8.06E-08	0.332557058	1.43484991	1.63E-08	0.075868411	-1.027455751	0.117429465	0.088484353	-0.813136176	0.215850214	0.295577944	1.025217868	0.387881785	0.038582609	-1.982242484	0.00082711	0.148428123	0.001205614	1	0.128090132	-0.202771108	1	0.140558505	-0.077936825	1	0.020398371	-2.841531496	5.88E-05	0.119726195	-0.165657116	1	0.064888399	-0.993956617	1	0.135750072	0.358176229	0.724684135
ENSBTAG00000004515	KCNK1	0.038770474	-1.350548915	0.000795456	0.055347218	-0.825336849	0.060559531	0.027793677	-1.853194546	4.62E-07	0.101698094	0.159596563	1	0.145165542	0.733890027	0.201582432	0.105610357	0.219879561	1	0.260390094	1.538877666	0.216335174	0.106102176	0.219539838	0.921909305	0.177775129	1.086741539	0.000348329	0.107060409	0.23762757	1	0.201754044	1.230394523	0.009572965	0.010799137	-3.00786451	6.49E-05	0.014965774	-1.655874504	1	0.097332598	0.207906991	1	0.067875036	0.455983306	0.7422064
ENSBTAG00000008453	LBR	0.253770375	-1.21596973	0.000815702	0.941279223	0.951515201	0.000367084	0.19918802	-1.588776386	1.08E-06	0.889536491	0.823117973	0.00851137	0.434899237	-0.366862375	1	0.544226345	-0.016962772	1	1.210462058	1.148993923	0.31094865	0.225357514	-1.336537501	0.025695084	0.883231988	0.775623379	0.01695212	0.282945366	-0.971995547	0.954409037	0.678888015	0.323765352	1	0.081593483	-2.789140825	1.38E-05	0.179589293	-1.524489081	1	0.475848258	-0.19336423	1	0.203625108	-1.114311543	0.801103345
ENSBTAG00000037844	CDH18	0.000440574	-3.780811829	0.000824275	0	-5.048111593	1.28E-05	0	-4.862088335	2.98E-05	0	-4.831162196	8.91E-05	0.001792167	-2.277094564	0.26786044	0.000951445	-3.063682271	0.017272588	0.035187851	1.9933404	0.374003409	0.001753755	-2.102329717	0.364798807	0.101021422	6.131799577	1.40E-43	0.015294344	0.698044973	0.992403538	0.001912361	-1.969932799	0.871460416	0.001199904	-2.217873207	0.383142516	0	0.455516914	1	0	-0.009191131	1	0	2.567374724	1
ENSBTAG00000003959	ARHGAP24	0.146270424	1.008873885	0.00082964	0.038027681	-1.208079897	0.00127451	0.098541219	0.320531739	0.523381825	0.062220353	-0.429368191	0.744608533	0.047791125	-0.811713679	0.44114446	0.041387843	-1.049654826	0.049872199	0.084450841	0.154855188	0.907012596	0.162222335	1.091171345	0.010071542	0.067159493	-0.296141756	0.761169456	0.110883995	0.478578405	0.971074806	0.017211245	-2.233718805	0.002850327	0.211183133	1.486708087	0.000264253	0.074828872	0.115783327	1	0.010814733	-1.937607904	1	0	-0.361970723	1
ENSBTAG00000017500	KCNK12	0.236588006	-1.225942242	0.000847139	0.176207471	-1.694843189	1.06E-07	0.132230525	-2.106594531	2.51E-10	0.506774045	-0.030040156	1	0.812449124	0.736262225	0.160487977	0.32063685	-0.752191345	0.25902997	0.872658693	0.76612566	0.48988502	0.798835388	0.681143031	0.241364033	1.605055447	1.98776468	5.76E-16	0.73030493	0.518237148	0.954409037	0.829964503	0.736923538	0.370126242	0.087593004	-2.595305837	6.10E-05	0.688425623	0.426322419	1	0.37851566	-0.424670565	1	0.814500431	0.679026332	0.724684135
ENSBTAG00000009218	ANLN	0.907140976	-1.15999736	0.000850968	3.741396655	1.230462492	2.40E-07	0.835915896	-1.290100372	4.49E-05	3.48476886	1.059302852	8.32E-05	1.394306071	-0.478067382	0.982800935	1.726872056	-0.148967542	1	2.378698695	0.325941877	0.72482892	0.601537954	-1.714989881	0.001584845	2.276086012	0.295157408	0.584282585	0.873689406	-1.137353377	0.951640972	1.905667345	0.009017421	1	0.355171632	-2.464115901	7.43E-05	0.703391398	-1.42300489	1	1.265323777	-0.587224805	1	1.221750646	-0.649343609	0.724684135
ENSBTAG00000018307	SEMA3F	0.039651621	-1.423064568	0.000851933	0.03125047	-1.804345521	1.76E-06	0.027793677	-1.958044852	5.02E-07	0.034757576	-1.62375568	9.36E-05	0.057946739	-0.821101157	0.506517954	0.046145066	-1.185491574	0.027729167	0.415216636	2.111902045	0.090995381	0.060504546	-0.731896564	0.542684311	0.560979295	3.431783751	1.90E-47	0.271474608	1.529561946	0.951640972	0.077450605	-0.361702644	1	0.020398371	-2.255287169	0.004045727	0.149657744	0.709322961	1	0.043258933	-0.897480744	1	0.067875036	0.354866418	0.734777581
ENSBTAG00000009426	EZH2	0.868811075	-1.158828222	0.000858566	3.089654921	0.944342383	0.000341905	0.830020268	-1.233791055	0.000101222	2.81793832	0.752663715	0.020658045	1.3817609	-0.42419468	1	2.484222004	0.522552494	0.500441711	2.702426919	0.575429413	0.583045967	0.688348825	-1.451926577	0.010604487	1.599976158	-0.197293649	0.845205477	2.127825621	0.23723486	1	2.225031566	0.314494159	1	0.65154796	-1.516623287	0.021569062	1.975482224	0.114320485	1	1.157176446	-0.651831466	1	1.696875898	-0.133148685	0.724684135
ENSBTAG00000007366	HAUS8	0.180635163	-1.216707189	0.000858566	0.469886588	0.309100722	0.730684631	0.160866434	-1.398403539	2.29E-05	0.428676775	0.148612776	1	0.514949371	0.438486454	0.851971981	0.689797378	0.958289362	0.003473023	0.365953645	-0.082724192	0.992015985	0.199928066	-1.010853639	0.153049695	0.466165893	0.279013275	0.577607863	0.325004812	-0.271812154	1	0.669326212	0.832925872	0.20150267	0.110391183	-1.861218835	0.004251761	0.224486616	-0.734888791	1	0.302812528	-0.339095849	1	0.067875036	-1.625739905	0.998608625
ENSBTAG00000013573	BIRC5	1.579015667	-1.155779009	0.000858566	6.743700864	1.30632154	2.12E-08	1.910604746	-0.866383129	0.00979773	5.414887112	0.856490379	0.004160123	2.078913936	-0.711358737	0.408303342	3.211125723	-0.038016444	1	1.956444489	-0.757612281	1	0.798835388	-2.108191194	2.17E-05	3.541393436	0.118738764	0.927594781	3.307401909	0.007511005	1	3.125753412	-0.077353381	1	0.83873301	-2.018278592	0.001227962	3.262538824	-0.025395763	1	2.768571684	-0.258386795	1	3.461626831	0.008255778	0.724684135
ENSBTAG00000015177	PRSS23	0.581997683	-1.167784988	0.000858566	0.429599837	-1.65094646	6.39E-08	0.229929511	-2.565178996	1.36E-14	2.117637523	0.949336694	0.000903506	2.63627793	1.280240123	3.82E-05	0.590371411	-1.138051984	0.005010353	1.653828974	0.437108029	0.661830691	3.81354018	1.851238722	3.68E-09	0.895083664	-0.487389293	0.336756622	1.194870632	-0.033036549	1	2.397144021	1.055022697	0.038257187	0.181185529	-2.800402359	9.48E-06	1.062569984	-0.202912393	1	1.232879578	0.010623018	1	1.221750646	-0.016346536	0.724684135
ENSBTAG00000016869	POLD3	0.526925987	-1.157128203	0.000915223	1.357324639	0.36167948	0.589358558	0.793804264	-0.524082032	0.20428752	1.000674914	-0.151996181	1	1.138026163	0.05627404	1	2.072722189	1.084299262	0.000275703	0.823395702	-0.416095349	1	0.376180441	-1.60281598	0.00381337	1.015857878	-0.123579526	0.972963293	0.967367264	-0.187821925	1	1.742160513	0.715112284	0.461009411	0.991120838	-0.154480946	1	0.718357172	-0.605868597	1	0.670513455	-0.707038032	1	1.221750646	0.137133647	0.724684135
ENSBTAG00000000820	GNG11	9.938017966	0.938043595	0.000919193	5.6239551	-0.038020822	1	5.717496284	-0.010313902	1	5.515726994	-0.069162049	1	6.063498979	0.083015455	1	5.519806187	-0.067119948	1	2.04089533	-1.506907207	0.977350306	7.418383519	0.392921881	0.679152094	1.686888443	-1.870951103	2.14E-07	2.961367374	-0.979174859	0.951640972	4.772295894	-0.284590674	1	5.619151193	-0.036566418	1	2.678873622	-1.118455275	1	6.629431415	0.192817113	1	4.751252513	-0.350141144	0.724684135
ENSBTAG00000004150	NRG1	0	-3.843396367	0.000930521	0.000753023	-2.491163469	0.008030881	0.000842233	-2.30514021	0.010658994	0.002574635	-0.995238121	0.573720099	0.004181723	-0.255399493	1	0.000951445	-2.105910507	0.120089965	0.02111271	2.358501993	0.33135416	0.007891897	0.692934518	0.778619792	0.036683757	3.970644785	1.58E-24	0.011470758	1.306328548	0.951640972	0.002868541	-0.583184345	1	0	-2.280457745	0.184563355	0	1.400021801	1	0	0.935313756	1	0	3.511879611	1
ENSBTAG00000016194	FBXO32	0.107940524	1.058854269	0.000948518	0.03125047	-0.997389299	0.026110269	0.041690516	-0.537328649	0.340902686	0.059645717	0.036855508	1	0.070491909	0.304434023	1	0.02664045	-1.208752216	0.029693248	0.140751402	1.337972132	0.312816505	0.168360477	1.710066747	3.51E-06	0.019752792	-1.625757112	0.00060991	0.043971239	-0.367604706	1	0.027729229	-1.077256063	0.577244279	0.081593483	0.521188204	0.505038143	0.059863098	0.329632473	1	0.043258933	-0.135075572	1	0.067875036	1.115678754	0.724684135
ENSBTAG00000033140	LRRC3B	0.000440574	-3.315148257	0.000962842	0.000753023	-2.980548309	0.000710656	0.001263349	-2.369572083	0.00527237	0.001716424	-2.00673376	0.039178814	0	-3.835496238	0.007289546	0.000475722	-3.190105634	0.005937314	0.01407514	1.440140462	0.670969904	0.000876877	-2.22875308	0.195454647	0.072803148	6.05824297	3.50E-52	0.001911793	-1.056842529	1	0.00095618	-2.096356162	0.557692527	0.002399808	-1.157399348	0.65882653	0	0.91848889	1	0	0.453780845	1	0	3.0303467	1
ENSBTAG00000021057	TMEM190	0.022909826	-1.574907531	0.00100496	0.019578608	-1.83511787	1.79E-05	0.021476932	-1.67781212	0.000117265	0.024029929	-1.508241193	0.001669453	0.02568773	-1.365056295	0.065329426	0.023786116	-1.507832506	0.006922831	0.365953645	2.585570901	0.042813275	0.032444467	-0.986946471	0.379226621	0.402956958	3.788322178	1.41E-50	0.091766065	0.565246845	0.964033473	0.036334852	-0.815852743	1	0.016798658	-1.879266371	0.041071733	0.074828872	0.468540921	1	0.054073666	0.003832876	1	0	-0.010498352	1
ENSBTAG00000023938	CENPA	0.370081797	-1.19260915	0.001008176	1.732706793	1.443806033	3.03E-10	0.193292391	-2.175480186	3.25E-11	1.543064748	1.172168274	7.18E-06	0.538844934	-0.594240812	0.709562682	0.495702667	-0.736327525	0.21497096	0.760057571	-0.05244978	0.959309803	0.238510676	-1.786021896	0.001094149	0.95434204	0.30441295	0.571709582	1.112663533	0.511100526	0.954409037	0.632035181	-0.337170381	1	0.152387829	-2.416336394	0.0001301	1.062569984	0.428659006	1	0.800290252	0.023133913	1	0.475125251	-0.635565335	0.725203879
ENSBTAG00000020263	TIMP4	0.01233606	-1.556702935	0.001036798	0.010542327	-1.816913275	2.01E-05	0.008843443	-2.045380936	3.25E-06	0.035615788	0.066162423	1	0.052570237	0.694872449	0.41877228	0.014747392	-1.282754922	0.029751051	0.098525981	1.620976237	0.249613778	0.042966997	0.364477037	0.814745374	0.133754621	2.46094401	4.87E-20	0.030588688	-0.09613683	1	0.054502277	0.730075997	0.644900542	0.002399808	-3.325126794	0.000495779	0.029931549	0.355352752	1	0.010814733	-0.696515349	1	0	0.877856292	1
ENSBTAG00000006368	N4BP3	0.009252045	-1.658859309	0.001064377	0.023343725	-0.281049377	0.973446617	0.020213583	-0.499765652	0.459071495	0.015876918	-0.867911382	0.192967698	0.029869453	0.127519232	1	0.042339287	0.703758281	0.349882765	0.049262991	1.003343368	0.544123768	0.016660672	-0.715581262	0.63779699	0.02370335	-0.232447081	0.898450228	0.01911793	-0.431161567	1	0.049721376	0.918347301	0.361675091	0.101991854	2.06315583	7.19E-07	0.044897323	1.075374205	1	0.086517865	1.794240223	1	0	1.179104134	1
ENSBTAG00000044012	TMEM196	0.001321721	-3.405494759	0.001149796	0.001129535	-3.665705098	0.000117629	0.000421116	-4.488871011	2.09E-05	0.0072948	-1.212813526	0.480115161	0.004779112	-1.722904412	0.582326578	0.003330056	-2.261896317	0.103768193	0.309653085	4.449392775	0.002254729	0.007891897	-0.969247485	0.895603963	0.108922539	3.941201007	2.32E-19	0.01911793	0.344873592	1	0.015298885	-0.038039667	1	0.004799617	-1.516011414	0.681171402	0	-0.175838493	1	0	-0.640546537	1	0	1.936019317	1
ENSBTAG00000032456	HIST2H2AB	0.013657781	-1.507793335	0.001159996	0.04894652	0.495345421	0.410672997	0.011370141	-1.783187507	3.06E-05	0.064365882	0.968532215	0.006187117	0.023895562	-0.641355928	0.922264202	0.064222514	0.947282433	0.021947927	0.035187851	0.182881794	0.954101761	0.01403004	-1.365784182	0.100901783	0.049664163	0.495093501	0.318447047	0.01911793	-0.834450108	0.992403538	0.049721376	0.484722904	1	0.011999042	-1.529817214	0.091505749	0.029931549	0.259634122	1	0.064888399	1.025574287	1	0	0.782419186	1
ENSBTAG00000010008	TTC12	0.042735636	1.177305837	0.001162701	0.021837678	0.019116764	1	0.029899259	0.545633781	0.276054623	0.018022447	-0.283218884	1	0.011947781	-0.866720647	0.655283207	0.019504616	-0.152704718	1	0.02111271	0.351515562	1	0.020168182	-0.066170054	1	0.007336751	-1.567053891	0.006831596	0.011470758	-0.732809846	1	0.009561803	-1.106137183	0.731354944	0.035997125	0.805469264	0.305392258	0.014965774	0.427502537	1	0.010814733	-0.037205507	1	0	1.535896492	1
ENSBTAG00000002940	WNT16	0.000440574	-3.148898913	0.001171794	0.001129535	-2.386913507	0.00380876	0.001684465	-1.867734898	0.022174315	0.000858212	-2.596142166	0.005972317	0.000597389	-2.659465874	0.047865814	0.000475722	-3.023856291	0.006013217	0.00703757	1.011579518	0.96085379	0.00350751	-0.70715264	0.854394057	0.055872183	4.88326474	6.93E-41	0.007647172	0.46475791	1	0.005737082	-0.066608819	1	0.001199904	-1.585960292	0.37399329	0.059863098	3.44987035	1	0	0.618840091	1	0	3.195405946	1
ENSBTAG00000024958	FAM214A	0.308401497	0.951932321	0.001175322	0.099022574	-0.935381993	0.014300649	0.200872485	0.209864197	0.730368256	0.128731764	-0.511956965	0.52264937	0.161892436	-0.138957584	1	0.11227047	-0.718238884	0.369912798	0.380028786	1.128525875	0.337237018	0.327075302	0.965624965	0.024887357	0.119645483	-0.609021594	0.253914801	0.248533091	0.511805533	0.960297367	0.087968588	-1.038763418	0.442795483	0.27957767	0.699900873	0.20273457	0.344212812	1.001667988	1	0.118962065	-0.468194078	1	0	-1.481299123	1
ENSBTAG00000016315	COTL1	0.204426135	-1.204762641	0.001183137	0.192773985	-1.314469104	6.97E-05	0.18192225	-1.387634407	3.37E-05	0.238153764	-0.973486436	0.016118026	0.270617245	-0.751871637	0.454557257	0.20836638	-1.16746114	0.007074683	0.415216636	-0.070474698	0.974379609	0.313045262	-0.515011208	0.721544765	2.362433932	3.281736758	7.21E-52	0.764717204	0.828296011	0.951640972	0.277292288	-0.69355412	0.962642629	0.160787158	-1.485025471	0.032161191	0.493870556	0.188535891	1	0.616439789	0.498500633	1	0.543000287	0.378540805	0.724684135
ENSBTAG00000003653	LYAR	0.662622646	-1.134758156	0.001184696	1.682630739	0.362422871	0.586852247	1.028366055	-0.453509166	0.309662114	1.295470655	-0.080770833	1	1.178648619	-0.225970784	1	2.018965566	0.658103526	0.152948108	1.027485235	-0.408282115	1	0.519111471	-1.444954293	0.011020208	2.23883789	0.81665732	0.009079338	1.278989524	-0.092520029	1	2.137062978	0.69906573	0.493409564	0.506359557	-1.465440778	0.027831396	1.077535758	-0.339328291	1	1.351841642	-0.013618385	1	1.900501005	0.438231064	0.724684135
ENSBTAG00000003788	RCC1	0.08767414	-1.231091843	0.001206918	0.281630743	0.662371489	0.047386229	0.236246256	0.344385774	0.423909407	0.160485599	-0.292738689	0.96046661	0.111711755	-0.835910984	0.321146539	0.228346718	0.281929243	1	0.302615514	0.681465048	0.564256813	0.042966997	-2.205802428	0.000109954	0.194141728	0.016418864	1	0.263827436	0.477136043	0.964033473	0.211315847	0.147443781	1	0.350372015	0.921975306	0.049087013	0.194555067	0.100431139	1	0.129776798	-0.47158699	1	0.271500144	0.723312085	0.724684135
ENSBTAG00000015107	SLC16A1	0.581116536	-1.137978236	0.001220256	0.894968285	-0.476010399	0.421153113	0.713371047	-0.82597535	0.016171448	1.07405202	-0.17563412	1	1.195972902	-0.0002403	1	1.07418102	-0.173215613	1	3.378033649	1.510721885	0.189335139	0.968072743	-0.322461873	0.891302004	3.434163993	1.828730758	1.11E-13	0.925307817	-0.379244059	1	1.881762837	0.702059605	0.493409564	0.411567128	-1.57928589	0.016347338	0.868014917	-0.460645349	1	0.908437584	-0.39695308	1	0.746625395	-0.649450371	0.724684135
ENSBTAG00000017697	CTF1	0.081946684	1.039101125	0.001279264	0.028614888	-0.719924508	0.198519338	0.045901679	0.042874812	1	0.039048635	-0.218257665	1	0.054362405	0.314436316	1	0.030921951	-0.577216226	0.931616387	0.070375701	0.776513684	0.636794818	0.088564626	1.079195117	0.020453976	0.008465482	-2.435586151	9.87E-07	0.043971239	0.022159929	1	0.016255065	-1.442720806	0.20878589	0.082793387	0.952864237	0.079258014	0.014965774	-0.615209139	1	0.032444199	-0.076546399	1	0	0.494966228	1
ENSBTAG00000021125	NUP160	0.105737656	-1.219394863	0.001306576	0.310998655	0.519206473	0.203022848	0.122965966	-0.993496568	0.005619551	0.277631505	0.313448301	0.76059013	0.204904448	-0.180274754	1	0.304938013	0.466016865	0.703901835	0.422254206	0.89758905	0.440179874	0.082426484	-1.525987059	0.010891783	0.390540918	0.870327375	0.004880414	0.248533091	0.121648499	1	0.305021517	0.436204641	1	0.075593962	-1.629686806	0.018866494	0.164623519	-0.381502877	1	0.194665197	-0.180934691	1	0.475125251	1.144073397	0.724684135
ENSBTAG00000009206	FOXS1	0.246280624	0.972832506	0.001306576	0.06250094	-1.279694338	0.000406449	0.125492664	-0.175114684	0.935751349	0.047630753	-1.670489507	1.11E-05	0.152334211	0.138541192	1	0.128920751	-0.128780389	1	0.218164673	0.681415273	0.56713323	0.106979053	-0.399449185	0.894075506	0.316609039	1.378624472	9.71E-07	0.122354753	-0.180207618	1	0.09370567	-0.593756684	1	0.116390704	-0.264818621	1	0.059863098	-0.928424506	1	0.291997795	1.104813498	1	0.067875036	-0.140119752	0.792933874
ENSBTAG00000027625	SFRP1	0.122038878	-1.21721546	0.001314902	0.168677237	-0.733159885	0.091525201	0.045480563	-2.692357963	3.29E-14	0.423527505	0.801300729	0.016199599	0.415782787	0.730846281	0.151090715	0.27782184	0.077091989	1	0.232239813	-0.160143862	1	0.29287708	0.155588547	0.972400588	0.493255436	1.02903588	0.000442296	0.3555935	0.441796762	0.971074806	0.420719333	0.717399993	0.428080462	0.034797221	-2.939405704	1.46E-05	0.478904782	0.879439619	1	0.183850463	-0.46404367	1	0.271500144	0.260803669	0.724684135
ENSBTAG00000021823	HJV	0.015420075	-1.482769311	0.001334178	0.021084655	-1.038651264	0.024598088	0.071589774	0.980262009	0.001650763	0.005578376	-2.930697869	1.01E-09	0.001792167	-4.224095373	1.10E-09	0.009038724	-2.23646127	1.21E-05	0.035187851	0.035640417	1	0.00350751	-3.303342396	2.21E-05	0.003386193	-3.501299445	1.13E-09	0.036324067	-0.103198165	1	0.007649442	-2.315473451	0.009572665	0.513558982	4.741085436	6.87E-65	0.119726195	1.709152621	1	0.021629466	-0.351716131	1	0.067875036	1.638029277	0.724684135
ENSBTAG00000004956	CHEK2	0.048463092	-1.273801293	0.001334178	0.188632356	0.960139182	0.000613488	0.049691726	-1.241751504	0.000649645	0.163060235	0.673443347	0.077572447	0.090803137	-0.290495967	1	0.120833472	0.159999096	1	0.154826542	0.553149423	0.643417256	0.035075099	-1.674343746	0.00719594	0.146735027	0.472504879	0.264010568	0.108972202	0.009997732	1	0.160638291	0.594302535	0.748234719	0.01439885	-2.874465385	7.76E-05	0.089794647	-0.091226265	1	0.097332598	-0.039284818	1	0.135750072	0.795475339	0.724684135
ENSBTAG00000024869	CX3CL1	0.027315561	1.402372393	0.001334178	0.012424886	0.03229649	1	0.006316745	-0.990562893	0.169498241	0.009869435	-0.321967202	1	0.014934727	0.339687225	1	0.009038724	-0.443292254	1	0.01407514	0.747321971	0.857898334	0.02104506	0.873308469	0.374758078	0.003950558	-1.567946371	0.046001208	0.021029723	0.901243829	0.960297367	0.009561803	-0.270142213	1	0.003599712	-1.429054237	0.374518193	0.044897323	2.251425309	1	0	-0.231583552	1	0	2.344982302	1
ENSBTAG00000053034	H4	0.00616803	-2.003001183	0.001337485	0.039157216	0.870953716	0.079402179	0.008422326	-1.57213263	0.005503664	0.041194165	0.941330101	0.06402516	0.010155614	-1.240752717	0.379708557	0.039009231	0.83001729	0.302514463	0.02111271	0.215279785	0.917722847	0.005261265	-2.041904775	0.056988614	0.033861929	0.577915387	0.345753007	0.021029723	-0.076338705	1	0.03251013	0.504678745	1	0.010799137	-1.04118083	0.53815456	0	-0.711261533	1	0	-1.175969577	1	0.067875036	2.40374971	0.724684135
ENSBTAG00000023007	ENSBTAG00000023007	0.019825811	1.419401357	0.001355972	0.004141629	-1.121640629	0.180549282	0.001263349	-2.590542429	0.00039631	0.011585859	0.468708978	0.89828577	0.014337337	0.808359952	0.739324194	0.008563002	-0.009292316	1	0	-0.381262235	1	0.026306325	1.775368456	0.001319004	0.001128731	-2.540625765	0.003009723	0.015294344	0.955202812	0.954409037	0.001912361	-1.721112253	0.587281003	0.001199904	-1.970389805	0.163644076	0	0.701677501	1	0	0.236969456	1	0	2.813535311	1
ENSBTAG00000014434	CCHCR1	0.044938504	-1.319999575	0.001377628	0.13592072	0.444679536	0.436766775	0.023582514	-2.282327419	2.16E-09	0.186661058	0.996578974	0.001276176	0.094387472	-0.161000273	1	0.162697037	0.735533306	0.113489299	0.316690655	1.634873821	0.194536897	0.056120159	-0.92632116	0.311729967	0.097635229	-0.109304189	1	0.133825511	0.377444486	0.994129097	0.143427046	0.487631742	0.993025482	0.031197508	-1.745286726	0.022693489	0.074828872	-0.249991249	1	0.118962065	0.289643996	1	0.135750072	0.859699809	0.724684135
ENSBTAG00000008319	DUSP9	0.011895486	-1.676627451	0.001401084	0.022590701	-0.739569663	0.307006119	0.005895628	-2.679377178	9.19E-08	0.0583584	0.830770773	0.070969636	0.075868411	1.242100167	0.005428521	0.015223115	-1.303591174	0.058311722	0.02815028	-0.0509219	1	0.080672729	1.290909556	0.009490383	0.029911371	-0.271922609	0.877956195	0.034412274	0.002740044	1	0.113785456	1.857921936	5.60E-05	0.001199904	-3.976703579	0.000291066	0	-1.298322499	1	0.032444199	0.243274033	1	0.067875036	1.815633777	0.724684135
ENSBTAG00000015074	PTGDS	0.165655661	0.978399051	0.001455514	0.07567885	-0.350469966	0.828497679	0.058114052	-0.759846325	0.073227128	0.108992894	0.251593643	0.933207791	0.099763973	0.102716446	1	0.075164128	-0.349091401	1	0.119638692	0.423764633	0.724322309	0.192913047	1.143192188	0.005700953	0.047406701	-1.042362418	0.023352204	0.055441997	-0.731639302	1	0.054502277	-0.796926037	0.892037635	0.076793866	-0.282550124	1	0.089794647	0.13520619	1	0.17303573	0.958720231	1	0.067875036	0.435669044	0.741163675
ENSBTAG00000031776	H2B	0.003084015	-2.063843144	0.001455514	0.018825584	0.624313749	0.428108297	0.006737861	-0.997017915	0.117926725	0.024459035	1.077192322	0.019612261	0.011350392	-0.180631724	1	0.022358949	0.901042254	0.201115509	0	-0.943682167	1	0	-4.017765422	0.001040622	0.013544772	0.082168809	1	0.009558965	-0.232209616	1	0.020079786	0.698561657	1	0.003599712	-1.524080844	0.259540564	0	0.139257569	1	0.032444199	1.691690657	1	0.067875036	3.256806491	0.724684135
ENSBTAG00000032862	DYDC2	0.008370898	2.036527182	0.001520769	0.002635582	0.039351248	1	0.001684465	-0.54016024	0.828016676	0.000429106	-1.913624356	0.22540148	0.001194778	-0.769000826	1	0.00618439	1.42460421	0.289612118	0.00703757	2.290115018	0.702740683	0.000876877	-0.783968237	0.9069135	0	-2.497557043	0.08049756	0.005735379	1.442390097	0.960297367	0.00095618	-0.65157132	1	0.002399808	0.304504756	1	0	2.346582542	1	0	1.881874497	1	0	4.458440352	1
ENSBTAG00000005163	S100A1	0.587725139	0.94662959	0.001559586	0.293302606	-0.237488957	0.970999369	0.508708515	0.694309143	0.024675625	0.184086423	-0.966091776	0.020171315	0.189372333	-0.895301899	0.236047009	0.253560002	-0.460143695	1	0.211127103	-0.648934016	1	0.266570755	-0.361612598	0.915701429	0.054179087	-2.749506792	2.03E-11	0.172061371	-0.983959738	0.960079602	0.1262158	-1.466425239	0.068817975	1.336693237	2.189018149	1.78E-10	0.299315488	-0.130118957	1	0.58399559	0.801865281	1	0.543000287	0.75665609	0.724684135
ENSBTAG00000026704	CENPW	0.733995564	-1.111467671	0.001572946	2.172095935	0.661352606	0.040960179	0.86413069	-0.864084897	0.010243879	2.271257428	0.723879583	0.030478642	1.376384399	-0.1194946	1	1.714027553	0.235006325	1	0.795245422	-0.903006017	1	0.523495858	-1.560957658	0.004877063	2.137816468	0.592323911	0.100779032	1.141340428	-0.389047107	1	1.806224593	0.300603228	1	0.437965019	-1.804763243	0.004494897	0.91291224	-0.701422446	1	1.48161844	-0.007909396	1	1.968376041	0.36149365	0.724684135
ENSBTAG00000020199	F2R	0.021588105	-1.424360969	0.001572946	0.031626982	-0.867162123	0.078548976	0.005474512	-3.386528537	5.07E-13	0.045485223	-0.284548607	1	0.046596347	-0.232155208	1	0.045669344	-0.273163496	1	0.119638692	1.216337091	0.366380113	0.025429447	-1.103757421	0.222407665	0.255657566	2.913134464	5.53E-31	0.063089169	0.254444689	1	0.06406408	0.264483029	1	0.003599712	-3.570737469	6.82E-05	0.089794647	0.921276707	1	0.043258933	-0.031645982	1	0.067875036	1.218820127	0.724684135
ENSBTAG00000002804	PDGFRB	0.001321721	-2.654634723	0.001594154	0.002635582	-1.883480892	0.01335189	0.000421116	-3.744251845	1.79E-05	0.006007482	-0.70305737	0.759125941	0.004181723	-1.133837513	0.796999801	0.000951445	-2.952365248	0.003033459	0.042225421	2.336657603	0.228879222	0.00701502	-0.359001621	1	0.071110051	4.295207433	2.11E-34	0.009558965	0.20423036	1	0.003824721	-1.106137183	1	0.002399808	-1.514469249	0.383658886	0.014965774	1.573353404	1	0.021629466	1.701302252	1	0	2.677557641	1
ENSBTAG00000009777	NUP35	0.041854489	-1.263528733	0.001770621	0.132532115	0.590984345	0.128606107	0.056850703	-0.800904818	0.048034419	0.123582494	0.456811738	0.435159934	0.077660578	-0.29565826	1	0.127493584	0.502656382	0.649154558	0.070375701	-0.298889781	1	0.038582609	-1.312837919	0.054996819	0.138269545	0.626404333	0.090819483	0.043971239	-1.064997978	0.954409037	0.15872593	0.815479408	0.305114376	0.032397412	-1.534716013	0.042553669	0.044897323	-0.681021919	1	0.097332598	0.181031285	1	0.067875036	0.429228431	0.747035363
ENSBTAG00000002080	NOV	0.026874988	-1.81591563	0.001781012	0.015813491	-2.620962563	3.42E-07	0.005474512	-4.079275597	6.48E-12	0.0802428	-0.141366402	1	0.057946739	-0.633384848	1	0.015698837	-2.582450547	4.81E-05	0.436329346	2.368541665	0.113059815	0.130654745	0.626090768	0.521469998	0.482532492	3.349312623	1.44E-27	0.175884957	1.055366974	0.951640972	0.037291032	-1.248947991	0.80118844	0.016798658	-2.341744865	0.044057902	0.26938394	1.683254267	1	0.086517865	0.13185275	1	0.135750072	1.118266548	0.724684135
ENSBTAG00000010106	CCND3	2.502898438	0.907300589	0.001788487	1.196554148	-0.343737855	0.720412996	2.460161545	0.883843853	0.000978393	0.702446327	-1.170141617	0.000743005	1.010782293	-0.586794094	0.719748066	1.485205112	0.012630434	1	1.252687478	-0.237865888	1	0.806727286	-0.909784338	0.166635967	0.924430669	-0.72666698	0.084229388	1.946205285	0.413227416	0.994129097	0.909327469	-0.727977753	0.758889782	2.317014938	0.69036435	0.224528072	2.035345321	0.457118043	1	1.146361713	-0.365704606	1	1.49325079	-0.011373571	0.724684135
ENSBTAG00000009685	ERI1	0.152438454	-1.164021675	0.001809179	0.379523783	0.292411426	0.78287935	0.155813039	-1.135682521	0.000859183	0.411083434	0.421907041	0.514258167	0.342901322	0.112491721	1	0.419111372	0.447964865	0.74729665	0.330765795	0.069393349	0.905373393	0.158714825	-1.049495991	0.132154856	0.428353405	0.474009161	0.222271707	0.368976051	0.21746656	1	0.545022773	0.830733377	0.211086465	0.181185529	-0.840128174	0.364985891	0.209520842	-0.533598342	1	0.335256727	0.098846515	1	0.271500144	-0.009076277	0.724684135
ENSBTAG00000013798	PTPRN	0.000440574	-3.481798126	0.001809445	0.00225907	-1.890259424	0.055485329	0.000842233	-2.962252497	0.002097156	0.003861953	-1.131429508	0.53568073	0.004779112	-0.759898619	1	0.001902889	-2.008355197	0.190490615	0.049262991	2.732119564	0.191527008	0.015783795	1.009393413	0.466339149	0.054179087	3.754432495	4.66E-18	0.011470758	0.628256643	1	0.004780902	-0.642638195	1	0	-2.927576721	0.177005583	0	0.752902824	1	0.032444199	2.314506057	1	0	2.864760634	1
ENSBTAG00000023730	TUBB3	0.026434414	-1.325568345	0.001822278	0.076055361	0.342743391	0.698284213	0.039163818	-0.733106224	0.098190957	0.073806212	0.28578741	0.886277958	0.028674675	-1.167416105	0.08177577	0.049950845	-0.344661876	1	0.098525981	0.753448074	0.589655171	0.026306325	-1.253549275	0.09753888	0.19639919	2.014923906	1.85E-14	0.030588688	-0.965694641	0.968380133	0.048765195	-0.348528942	1	0.050395975	-0.289922211	1	0.014965774	-1.086376865	1	0.064888399	0.262354775	1	0	0.024267066	1
ENSBTAG00000004286	CDC45	0.24451833	-1.151036533	0.001901667	0.774108033	0.735632647	0.016729741	0.266145515	-1.025867942	0.00283555	0.845767691	0.875689575	0.003801058	0.439080961	-0.228217246	1	0.643652312	0.390210921	1	0.809320562	0.680490463	0.538092002	0.199928066	-1.395212028	0.018334602	0.546870158	0.118180766	0.932339714	0.302063296	-0.76027517	0.984104183	0.676019475	0.440672949	1	0.167986583	-1.631700519	0.013959411	0.224486616	-1.109566493	1	0.324441994	-0.617835812	1	0.543000287	0.17117105	0.724684135
ENSBTAG00000017215	WDR76	0.144948704	-1.172532274	0.001917825	0.266570276	-0.226280879	0.983599696	0.06864196	-2.29844241	1.66E-11	0.366027316	0.300615579	0.778398171	0.467158246	0.687617606	0.211040238	0.55136218	1.002433086	0.002034112	0.471517197	0.641865148	0.565593818	0.204312454	-0.607090475	0.605702649	0.378689242	0.345483268	0.450339433	0.271474608	-0.168974062	1	0.610999214	1.085672599	0.024291035	0.033597317	-3.194900264	2.24E-06	0.314281263	0.08528797	1	0.227109396	-0.379420075	1	0.33937518	0.318702977	0.724684135
ENSBTAG00000007547	CACNG1	0.011454913	-1.801457577	0.001917825	0.005271164	-2.934362061	5.42E-08	0.02400363	-0.706721429	0.321452071	0.003432847	-3.466570119	1.48E-08	0.001792167	-4.113882906	7.69E-07	0.006660113	-2.549109098	8.61E-05	0.140751402	1.984049308	0.19924429	0.004384387	-2.927934011	0.002267566	0.003386193	-3.39064184	7.76E-07	0.022941516	-0.626372284	1	0.003824721	-3.060585031	0.009236205	0.656347577	6.102551297	3.45E-81	0.014965774	-0.363910841	1	0.032444199	0.175394177	1	0	0.745944616	1
ENSBTAG00000013736	PROM1	0.014098354	-1.461250749	0.001919274	0.030873959	-0.279096278	0.956680361	0.016844653	-1.204976048	0.00527237	0.037761318	0.052553977	1	0.043012012	0.262285491	1	0.040436398	0.164368438	1	0.084450841	1.312900337	0.354886912	0.022798815	-0.677205256	0.635695721	0.080139899	1.311817046	3.81E-05	0.070736341	1.011378962	0.951640972	0.076494424	1.160077833	0.049422195	0.003599712	-3.003748402	0.000941859	0	-1.329438624	1	0.032444199	0.212023099	1	0	0.782419186	1
ENSBTAG00000050846	ENSBTAG00000050846	0	-4.092755835	0.00198499	0	-4.352966175	0.000408175	0.000421116	-3.155447278	0.003733469	0	-4.136016777	0.001873255	0.001194778	-1.995276682	0.507936338	0	-3.967713213	0.008427744	0.00703757	1.079218235	0.88085312	0	-3.006360658	0.18634213	0.002257462	-1.325006573	0.329408538	0.013382551	1.248012052	0.954409037	0	-2.873963741	0.533565307	0.128389745	6.954422699	3.68E-41	0.014965774	2.162157971	1	0.021629466	2.294000401	1	0	3.262520142	1
ENSBTAG00000050091	GCNT4	0.044938504	-1.266603318	0.00203359	0.079067455	-0.40445649	0.711205896	0.088013311	-0.226124461	0.857153391	0.072948	-0.523882548	0.540706828	0.108724809	0.116517759	1	0.100853134	-0.003916519	1	0.274465234	1.480471919	0.233710447	0.060504546	-0.763209677	0.46393636	0.227439292	1.363641461	1.74E-06	0.147208062	0.571028563	0.954409037	0.179761897	0.897374282	0.195707024	0.074394058	-0.444079921	0.867799371	0.074828872	-0.1992361	1	0.021629466	-1.666188421	1	0.067875036	0.324667617	0.749177746
ENSBTAG00000000345	CLDN15	0.062561447	-1.265080929	0.002132369	0.064760011	-1.233379656	0.000943604	0.050533958	-1.59272785	1.40E-05	0.082817435	-0.839014804	0.096690525	0.10215353	-0.492674873	1	0.070406905	-1.077326458	0.041882618	0.492629907	1.844915548	0.135686119	0.100840911	-0.49584285	0.79655903	0.717308535	3.136229729	9.27E-41	0.19691468	0.511792712	0.960297367	0.115697817	-0.287310912	1	0.037197029	-1.923769418	0.009097999	0.224486616	0.748022438	1	0.054073666	-1.137126465	1	0.135750072	0.437822321	0.724684135
ENSBTAG00000014246	CENPH	0.235266285	-1.138217056	0.002162532	0.66416662	0.543646424	0.167699989	0.304888216	-0.742090948	0.048920346	0.665114116	0.533355522	0.235995083	0.522715429	0.120320074	1	0.668389873	0.533072553	0.492038804	0.288540374	-0.72837221	1	0.189405537	-1.405481237	0.016884563	0.573395336	0.270037402	0.643693006	0.351769914	-0.468853005	1	0.680800376	0.524775435	0.840656362	0.13558917	-1.873990736	0.003782883	0.434007458	-0.132742101	1	0.594810323	0.30709669	1	0.746625395	0.654368014	0.724684135
ENSBTAG00000003398	KCNG1	0.059036858	-1.211712773	0.002165402	0.125754904	-0.030012346	1	0.031583724	-2.151188845	1.90E-09	0.270765811	1.321676655	3.72E-07	0.170255883	0.458349315	0.856354472	0.077067017	-0.797155866	0.241433168	0.084450841	-0.50189194	1	0.228865023	0.91290688	0.044235667	0.110615636	-0.22792992	0.864325648	0.214120817	0.776275489	0.951640972	0.195060782	0.654157469	0.60026783	0.021598275	-2.548378809	0.00029145	0.149657744	0.338853269	1	0.064888399	-0.780301403	1	0.135750072	0.571505986	0.724684135
ENSBTAG00000003990	ITPRIP	0.045819651	-1.295290241	0.002229974	0.059865359	-0.905507198	0.038853447	0.024424747	-2.235538319	6.41E-09	0.099552564	-0.088154018	1	0.111114366	0.09033638	1	0.090862965	-0.232019276	1	0.436329346	2.096728003	0.089761918	0.131531623	0.350565905	0.756032861	0.335797465	2.039446817	1.21E-14	0.145296269	0.494483907	0.968510822	0.138646144	0.430503384	1	0.025197987	-2.048755579	0.007280043	0.224486616	1.167940323	1	0.129776798	0.401500898	1	0	-0.731024836	1
ENSBTAG00000025450	SYNE2	0.410614565	-1.099831785	0.002269901	1.341134637	0.856066274	0.002310178	0.276673423	-1.704428001	1.79E-07	1.614296324	1.175778036	7.43E-06	0.649959299	-0.372021935	1	0.840601356	0.031354513	1	2.962817013	1.866933632	0.101970217	0.467375699	-0.856937811	0.2912736	0.74044752	-0.170024299	0.898806149	0.74942286	-0.14068862	1	1.033630908	0.347342648	1	0.113990895	-2.897203072	6.57E-06	0.748288721	-0.133415251	1	0.432589326	-0.913918248	1	0.407250215	-0.890678568	0.740792604
ENSBTAG00000004249	TANC2	0.116311422	1.021483301	0.002280695	0.079443966	0.362130239	0.694738946	0.06527303	0.028304865	1	0.062649459	-0.038549293	1	0.044206791	-0.569651691	1	0.058038124	-0.159054454	1	0.154826542	1.332550284	0.316451658	0.038582609	-0.746681004	0.556512039	0.016930965	-1.988413212	4.11E-05	0.084118892	0.425229546	0.98954227	0.042071933	-0.614284087	1	0.076793866	0.28495518	0.817063115	0.044897323	-0.130623778	1	0.032444199	-0.595331823	1	0.067875036	0.978880532	0.724684135
ENSBTAG00000005213	ZWILCH	0.277120774	-1.134810703	0.002286782	0.876519212	0.753679038	0.012861558	0.345736499	-0.797839108	0.030180085	0.738920327	0.436677531	0.459544762	0.465366079	-0.315915441	1	0.73308811	0.416518379	0.925381562	0.999334955	0.819146243	0.462789177	0.220973126	-1.416910767	0.015892963	0.698120108	0.327577834	0.524830864	0.758981825	0.428515255	0.970881815	0.696099261	0.308597257	1	0.211183133	-1.466069079	0.031645524	0.718357172	0.344309212	1	0.400145126	-0.488650235	1	0.475125251	-0.164010866	0.724684135
ENSBTAG00000008864	LY96	0.040532768	-1.241653018	0.002286782	0.040663262	-1.258553618	0.000615715	0.020213583	-2.278856722	1.16E-09	0.042910588	-1.158736854	0.00548961	0.048985903	-0.925195709	0.252518633	0.029494784	-1.704896885	9.07E-05	0.182976823	1.077082491	0.398717004	0.053489527	-0.767499926	0.452168036	0.582425183	3.878574694	1.35E-70	0.05735379	-0.622362695	1	0.041115753	-1.145473929	0.365845443	0.022798179	-1.959380045	0.007037364	0.014965774	-1.616050606	1	0.108147331	0.386263898	1	0.067875036	0.495807204	0.740991773
ENSBTAG00000020605	SMTNL2	0.053309402	-1.226397726	0.002289711	0.054594195	-1.211001255	0.000887583	0.05727182	-1.122987506	0.002320247	0.073377106	-0.739499366	0.167965266	0.112906533	-0.050540701	1	0.063746792	-0.946352221	0.094820606	0.246314954	1.115579711	0.366289228	0.084180239	-0.487836143	0.781026054	0.480839396	2.592891757	1.02E-27	0.152943441	0.413230051	0.984104183	0.178805717	0.662137883	0.600029777	0.073194154	-0.680490021	0.585816107	0.194555067	0.821555012	1	0.086517865	-0.283834465	1	0	-0.882380836	1
ENSBTAG00000027524	SMTNL1	0.000440574	-3.541740667	0.002345269	0.000753023	-3.208576265	0.001706842	0.001263349	-2.599053929	0.008649414	0.001287318	-2.56812779	0.024225863	0	-4.0606711	0.015910421	0.000475722	-3.416698044	0.012804818	0.02815028	1.966051178	0.409735934	0.001753755	-1.861970749	0.473816825	0.080704265	5.546837076	1.21E-35	0.013382551	0.767790384	0.994129097	0.00095618	-2.322948572	0.671915316	0.001199904	-1.978802045	0.449456417	0	0.693314028	1	0.032444199	2.253843275	1	0.067875036	3.813535311	0.724684135
ENSBTAG00000008923	GPR83	0.003965162	-2.078950036	0.002351153	0.005647675	-1.633074094	0.009291623	0.002526698	-2.681516089	2.87E-05	0.011585859	-0.551054276	0.834303794	0.01254517	-0.395429944	1	0.00808728	-1.068435801	0.496299652	0.070375701	2.223663368	0.189335139	0.01052253	-0.600104045	0.891302004	0.085783554	3.140311076	9.02E-22	0.036324067	1.226353171	0.951640972	0.024860688	0.653632541	1	0.003599712	-1.865420245	0.163996344	0.014965774	0.806014161	1	0.021629466	0.930784098	1	0	1.913370578	1
ENSBTAG00000018050	CDR2	0.081065536	-1.192349273	0.002363466	0.185243751	0.111350972	1	0.045901679	-2.050806308	4.94E-09	0.284497199	0.848341868	0.00723933	0.173242828	0.000411757	1	0.172211483	-0.010169507	1	0.218164673	0.367723328	0.738838758	0.144684785	-0.271049531	1	0.297420612	0.88784667	0.004614473	0.271474608	0.675167268	0.951640972	0.261037223	0.634818483	0.63521658	0.040796742	-2.099211306	0.002280617	0.254418165	0.614433964	1	0.151406264	-0.114623814	1	0.135750072	0.134764595	0.724684135
ENSBTAG00000018589	RFC2	0.481546909	-1.08237805	0.002390973	1.074940872	0.198612987	0.953559239	0.416062925	-1.310963407	3.47E-05	1.401459807	0.64870087	0.077525459	1.224050188	0.396029449	1	1.269227175	0.468694309	0.708027374	0.745982431	-0.35675425	1	0.600661077	-0.703319336	0.455630175	1.282802754	0.475632282	0.242749361	0.464565702	-1.058691572	0.954409037	1.54423119	0.743936274	0.394713866	0.249580066	-1.980246104	0.001726	0.389110135	-1.266758606	1	1.189620645	0.31474529	1	0.950250503	-0.003849976	0.724684135
ENSBTAG00000011981	MYBL1	0.176670001	-1.1432444	0.002400751	0.498877988	0.537491053	0.185983996	0.224033883	-0.781376536	0.037515983	0.500766563	0.531490924	0.251391863	0.326771817	-0.174344483	1	0.63318642	0.93079483	0.005675812	0.492629907	0.444880212	0.674449184	0.137669765	-1.456831163	0.013859504	0.226310561	-0.743965818	0.107849163	0.477948253	0.402706396	0.979349477	0.579445264	0.715873692	0.40108332	0.151187924	-1.301944863	0.071198241	0.404075909	0.176449374	1	0.140591531	-1.291169846	1	0.271500144	-0.201899191	0.724684135
ENSBTAG00000050881	ENSBTAG00000050881	0.000881147	-2.870363414	0.002418323	0.009036281	0.138886922	1	0.003368931	-1.30514021	0.119206666	0.015447812	1.050716512	0.134208284	0.001194778	-2.380930375	0.091016438	0.019028893	1.412922405	0.023113739	0.01407514	1.290115018	0.704834624	0.000876877	-2.377808889	0.135112006	0.012980406	0.729213818	0.389546937	0.003823586	-0.612057687	1	0.020079786	1.402876465	0.245087876	0.001199904	-1.901265444	0.317993048	0.014965774	1.779214101	1	0	0.305682206	1	0	2.882248061	1
ENSBTAG00000006078	ENSBTAG00000006078	0.127766335	-1.157012762	0.002430938	0.149098629	-0.936832293	0.011832549	0.150338526	-0.91194583	0.011871032	0.164776658	-0.767853216	0.10482213	0.237163458	-0.183251584	1	0.206463491	-0.407956052	1	0.380028786	0.530593299	0.626576078	0.154330437	-0.821806703	0.348867595	1.057056559	2.507799833	8.08E-27	0.420594462	0.683398197	0.951640972	0.373866499	0.522346241	0.871908356	0.074394058	-1.868729015	0.005159569	0.344212812	0.408268232	1	0.237924129	-0.118125503	1	0.135750072	-0.485850215	0.759457028
ENSBTAG00000027320	KCNB1	0.115430275	1.016552482	0.002458282	0.074925826	0.269579509	0.873901253	0.086328846	0.50673357	0.227388412	0.037332212	-0.847781817	0.147888247	0.038830289	-0.757821902	0.715478809	0.063746792	-0.001080533	1	0.239277383	1.959966416	0.137322049	0.031567589	-1.031515664	0.28512651	0.011851675	-2.486786147	6.25E-07	0.084118892	0.432559088	0.98949521	0.012430344	-2.328927425	0.00685838	0.130789554	1.108584546	0.029695576	0.13469197	1.205506515	1	0.032444199	-0.5882482	1	0	-0.015228504	1
ENSBTAG00000011734	ANKRD1	15.18568973	0.885434719	0.002514119	5.256856204	-0.87862109	0.011557308	15.75648825	0.960843572	0.000222809	5.665484947	-0.749206559	0.079653788	6.502579939	-0.515887301	0.882379848	8.990676302	-0.010878577	1	23.91366321	1.410437616	0.282776155	8.284738474	-0.135955723	1	1.362942653	-2.85162633	3.51E-14	8.279975532	-0.133818751	1	4.045598864	-1.20788487	0.115657992	21.67986841	1.354351434	0.000656026	11.19439927	0.288839405	1	6.748393479	-0.438020852	1	10.86000574	0.177854521	0.724684135
ENSBTAG00000015392	TTF2	0.369641223	-1.115583251	0.002524155	1.355065569	1.055335836	3.33E-05	0.309941612	-1.389508442	2.01E-05	1.275302678	0.913910726	0.001730547	0.611726399	-0.318992565	1	0.740223944	-0.021144717	1	1.013410095	0.437825285	0.667007601	0.385826093	-1.001002212	0.151925782	0.869122851	0.236376159	0.70760322	0.577361489	-0.384866532	1	0.844307208	0.181596389	1	0.179985624	-2.100606396	0.000907843	0.538767879	-0.460671099	1	0.540736657	-0.460988489	1	0.543000287	-0.391174833	0.724684135
ENSBTAG00000020884	CASP4	0.02599384	-1.298697736	0.002583632	0.017696049	-1.896632259	4.72E-07	0.015160188	-2.100447505	9.76E-08	0.027891882	-1.196491776	0.006659055	0.035245955	-0.809264697	0.504501366	0.024737561	-1.361860645	0.005323705	0.070375701	0.350882107	0.833913583	0.053489527	-0.162347266	1	0.382639801	3.811487185	2.54E-63	0.05735379	-0.030968195	1	0.025816868	-1.221185856	0.345962176	0.020398371	-1.527270531	0.059526174	0.014965774	-1.036964671	1	0.064888399	0.311979445	1	0	0.073636983	1
ENSBTAG00000050992	CNIH2	0.007930324	-1.609015385	0.002629945	0.027108842	0.267243848	0.953267169	0.009685675	-1.329214345	0.005937903	0.027891882	0.312010078	0.943095949	0.020908617	-0.139112455	1	0.030921951	0.480313643	1	0.01407514	-0.164450846	1	0.014906917	-0.603989571	0.761202076	0.039505584	0.878960938	0.033738584	0.047794825	1.125593111	0.951640972	0.041115753	0.908111773	0.401022432	0.007199425	-1.526542081	0.14259094	0.014965774	0.33028073	1	0.032444199	0.872071322	1	0	1.438900166	1
ENSBTAG00000019738	MDM1	0.006608604	-2.01634272	0.00265437	0.032380005	0.39837226	0.83678219	0.005474512	-2.289198666	0.000170438	0.041194165	0.808180791	0.206056239	0.029869453	0.255219581	1	0.038533509	0.680618188	0.751000665	0.126676262	2.40114633	0.140477677	0.026306325	0.070247192	1	0.021445889	-0.260517846	0.965690007	0.024853309	0.043294142	1	0.045896655	0.920364501	0.617122413	0.001199904	-3.495051795	0.009440061	0	-0.817501581	1	0.021629466	0.308617497	1	0.067875036	2.29728556	0.724684135
ENSBTAG00000009471	CEP135	0.068288903	-1.184323075	0.002766596	0.217247245	0.698577092	0.033558582	0.05727182	-1.456312766	3.33E-05	0.210690988	0.627694575	0.111287431	0.137399484	-0.086609578	1	0.187434598	0.419135997	0.910153092	0.323728225	1.186492386	0.323264958	0.073657709	-1.012543839	0.188930516	0.201478479	0.529213708	0.175554882	0.141472683	-0.026560755	1	0.166375373	0.210786376	1	0.04319655	-1.761463644	0.012499266	0.164623519	0.281407152	1	0.075703132	-0.77035123	1	0	-1.197431836	1
ENSBTAG00000043950	LCA5	0.014538928	-1.416030356	0.002798348	0.051582101	0.588179963	0.222539783	0.00800121	-2.285587413	2.21E-07	0.065224094	0.99274248	0.004422459	0.034051177	-0.103452232	1	0.048047955	0.448372376	1	0.049262991	0.602059024	0.763911858	0.023675692	-0.622605249	0.683556075	0.04627797	0.380392643	0.505865949	0.042059446	0.254880784	1	0.045896655	0.36267493	1	0.01439885	-1.284639472	0.176562911	0.059863098	1.000721705	1	0.010814733	-0.792093009	1	0	0.782419186	1
ENSBTAG00000002997	ADAMTSL1	0.003965162	-2.083566664	0.002907346	0.004141629	-2.071494521	0.001132083	0.004211163	-2.015633593	0.001460452	0.012014965	-0.500428203	0.928944182	0.015532116	-0.080608736	1	0.006660113	-1.350329234	0.209550868	0.126676262	3.04500252	0.044007741	0.018414427	0.196731207	1	0.075624975	2.806029415	6.95E-16	0.047794825	1.628950413	0.951640972	0.013386524	-0.256579762	1	0.011999042	-0.37850789	1	0.014965774	0.801512768	1	0	-0.667682667	1	0	1.908883187	1
ENSBTAG00000007681	DHFR	0.244958904	-1.109798877	0.002950961	0.535399622	0.131267067	1	0.269935561	-0.965209177	0.005334043	0.492613551	-0.008859753	1	0.695958257	0.547986527	0.574368596	0.846785746	0.906228828	0.007074683	0.274465234	-0.830593264	1	0.327952179	-0.623470038	0.565354296	0.558721833	0.193003918	0.790801771	0.346034535	-0.524925095	1	0.857693732	0.854543357	0.165867946	0.185985145	-1.446733202	0.034147239	0.50883633	0.058933717	1	0.497477724	0.021374619	1	0.271500144	-0.641160897	0.73745114
ENSBTAG00000002736	DNMT1	1.390890753	-1.057596666	0.003029008	3.21428029	0.286555525	0.778117462	1.249031007	-1.227455594	0.000105334	3.138909519	0.240382939	0.93853506	3.191252369	0.256922966	1	4.449906669	0.83121871	0.018536833	4.067715519	0.580821842	0.577264447	1.543304373	-0.854751964	0.211250678	3.325805819	0.325616546	0.517224843	2.250180374	-0.279641936	1	4.329584414	0.722711026	0.435599276	0.878329847	-1.672115411	0.009097999	1.840790254	-0.57224573	1	2.217020294	-0.302353966	1	2.036251077	-0.462987044	0.724684135
ENSBTAG00000015532	NR0B1	0.00616803	2.267852728	0.003074203	0	-2.585139617	0.141508995	0.001684465	0.087870983	1	0.001287318	-0.246199695	1	0.000597389	-0.795967874	1	0.003805779	1.321510717	0.833642767	0	1.835549154	1	0	-1.238534101	0.804820714	0	-1.925650696	0.317446053	0.001911793	0.972904814	1	0.00095618	-0.066608819	1	0.004799617	1.724996686	0.332567359	0	2.91848889	1	0	2.453780845	1	0	5.0303467	1
ENSBTAG00000017116	RASD2	0.003524589	-1.973456907	0.003074203	0.011295351	-0.322356749	0.978665224	0.004211163	-1.747039662	0.003073105	0.011156753	-0.328661855	1	0.009558225	-0.521573606	1	0.011417336	-0.283215038	1	0.02815028	1.317082065	0.541962464	0.005261265	-1.260644802	0.373373011	0.065466397	2.896779547	1.09E-19	0.01911793	0.585453147	0.995349123	0.012430344	-0.089328895	1	0.003599712	-1.607819726	0.221311509	0.029931549	1.652208825	1	0	-0.408228152	1	0	2.168337703	1
ENSBTAG00000000869	RNF219	0.074456933	-1.166028824	0.003074203	0.204445847	0.457338442	0.351982085	0.073695356	-1.187099113	0.000844963	0.193955858	0.357429577	0.662531072	0.161295047	0.048838405	1	0.250229945	0.786783262	0.044706695	0.232239813	0.60449972	0.604844701	0.080672729	-0.98877113	0.204670232	0.176082032	0.189037767	0.768332724	0.217944403	0.500479833	0.960297367	0.216096749	0.499412118	0.926294955	0.0575954	-1.458446126	0.046202647	0.179589293	0.290193042	1	0.108147331	-0.416492982	1	0.203625108	0.697251803	0.724684135
ENSBTAG00000020066	ZW10	0.252008081	-1.107586277	0.003074203	0.621244287	0.340458368	0.667802719	0.239615186	-1.189821174	0.00037441	0.671550704	0.465979546	0.380764443	0.504793757	-0.012175447	1	0.691224545	0.507474991	0.579876199	0.738944861	0.546360258	0.60876373	0.337597832	-0.620414133	0.570931738	0.734803865	0.597312893	0.103092265	0.384270395	-0.410999043	1	0.768768964	0.63884273	0.569883535	0.187185049	-1.476782451	0.029695576	0.448973233	-0.155668908	1	0.475848258	-0.080627788	1	0.543000287	0.168635688	0.724684135
ENSBTAG00000013929	RRAD	0.047141372	-1.385035534	0.003173552	0.026355818	-2.275787681	1.99E-08	0.256880956	1.439656734	4.24E-07	0.008582118	-3.849898758	3.82E-15	0.01911645	-2.657127903	3.38E-06	0.03472773	-1.828785478	0.000271373	0.175939253	0.665290928	0.596163761	0.015783795	-2.865961609	6.69E-05	0.040634315	-1.574859645	0.001435908	0.084118892	-0.432751449	1	0.019123606	-2.587845722	0.002544241	1.28869707	4.393462343	2.13E-47	0.059863098	-0.644207335	1	0.17303573	0.664560827	1	0.271500144	1.467650475	0.724684135
ENSBTAG00000019203	S100A4	18.11330109	0.874209464	0.00320479	9.646982499	-0.197176567	0.994379664	6.447711984	-0.833805583	0.014691387	12.56379109	0.241675437	0.93853506	13.06489878	0.294466857	1	8.674320953	-0.360330507	1	4.750359819	-1.206921012	1	20.68290923	1.013924046	0.013836575	6.943952962	-0.698242905	0.10281629	4.087413458	-1.436973599	0.951640972	7.704900885	-0.520465699	1	6.375090815	-0.796916792	0.307653172	3.576820087	-1.621019267	1	30.35695592	1.480762041	1	13.43925711	0.220286167	0.724684135
ENSBTAG00000007783	MYBL2	1.004948308	-1.054460137	0.00320479	2.590776933	0.481142222	0.273559937	1.150489788	-0.849749581	0.01189172	2.638142956	0.501242256	0.286880849	1.71331183	-0.210376666	1	2.612667033	0.476705274	0.669750404	2.603900938	0.408514693	0.677344957	0.7321927	-1.475194468	0.009009304	2.543030888	0.421446245	0.328386531	3.207988673	0.736505139	0.951640972	2.525272181	0.390579624	1	0.59395256	-1.76521017	0.00555243	2.723770945	0.464549415	1	1.600580505	-0.298011524	1	1.561125826	-0.360500046	0.724684135
ENSBTAG00000047231	TNNI1	0.008811471	-1.723158489	0.003287898	0.005271164	-2.485603943	2.84E-06	0.038742701	0.568136105	0.282578819	0.001716424	-3.881202878	2.83E-09	0.001792167	-3.673166785	8.61E-06	0.005708668	-2.312361384	0.00041563	0.035187851	0.588305869	0.740747016	0.001753755	-3.493966784	0.000543002	0.001693096	-3.763321242	2.35E-07	0.003823586	-2.322056233	0.951640972	0	-4.951966253	0.000188083	0.437965019	5.579458256	2.12E-68	0	-0.92734018	1	0.086517865	1.799736211	1	0.067875036	2.187232015	0.724684135
ENSBTAG00000010546	LIN54	0.131290923	-1.14413967	0.003396988	0.289160977	0.104590596	1	0.115806988	-1.340587582	0.000103268	0.385766187	0.591986374	0.143718913	0.281967637	0.059367896	1	0.411024093	0.691312572	0.119555834	1.217499628	2.198791662	0.051971132	0.173621742	-0.674386141	0.532617351	0.290083861	0.104879219	0.915131776	0.305886882	0.180849938	1	0.44079912	0.751411339	0.372117771	0.068394537	-2.016766139	0.002907458	0.389110135	0.55191288	1	0.108147331	-1.212724525	1	0.135750072	-0.512859336	0.757039762
ENSBTAG00000015778	SASS6	0.111465113	-1.131713904	0.003443073	0.383665411	0.911308053	0.001226748	0.088855544	-1.481333267	1.28E-05	0.350150399	0.7230718	0.034036037	0.199527947	-0.214231677	1	0.282579064	0.346346489	1	0.450404487	0.997584938	0.386857167	0.123639725	-0.923044479	0.24479978	0.265251779	0.23671929	0.674558141	0.141472683	-0.694777095	1	0.288766452	0.358870854	1	0.069594441	-1.741691763	0.010572353	0.074828872	-1.376545725	1	0.194665197	-0.173978737	1	0.203625108	0.149687646	0.724684135
ENSBTAG00000000842	UBASH3B	0.023350399	-1.369017032	0.003457223	0.024849771	-1.299701025	0.002202917	0.026530328	-1.18401643	0.005693903	0.039477741	-0.57231929	0.56284767	0.059738906	0.091121004	1	0.050902289	-0.166283125	1	0.211127103	1.958909109	0.140477677	0.059627669	0.09217971	1	0.205429038	2.305707363	3.05E-17	0.087942479	0.679218488	0.954409037	0.073625883	0.414303812	1	0.011999042	-2.160540032	0.010674022	0.044897323	0.051126658	1	0.032444199	-0.413581386	1	0	0.158982538	1
ENSBTAG00000017071	C1QTNF3	0.548514092	0.887711725	0.003631853	0.357309593	0.152783988	1	0.138126153	-1.351771138	6.18E-05	0.502482987	0.73480963	0.033927888	0.390692447	0.287401519	1	0.313025293	-0.067167802	1	0.323728225	0.008069025	0.941346977	0.408624908	0.348350044	0.709339543	0.056436549	-2.636830239	6.04E-11	0.344122742	0.082820661	1	0.293547353	-0.159083782	1	0.062395016	-2.41473601	0.00023165	0.523802105	0.703775967	1	0.270368328	-0.232748802	1	0.067875036	-1.362202798	0.955823388
ENSBTAG00000017505	PAXIP1	0.085911846	-1.16076196	0.003675433	0.193150497	0.11917413	1	0.078748752	-1.298632245	0.000247286	0.208974564	0.248438528	0.91542366	0.192956667	0.112036342	1	0.287812009	0.788194944	0.047450535	0.499667477	1.500682003	0.212787641	0.113117196	-0.695837327	0.52031913	0.219538175	0.320328546	0.522009548	0.206473645	0.212743563	1	0.309802418	0.846305564	0.228978581	0.082793387	-1.138358282	0.168118639	0.179589293	0.089023266	1	0.162220997	-0.074858049	1	0.203625108	0.496648671	0.724684135
ENSBTAG00000010349	IL1A	0	-3.541740667	0.003675433	0.00451814	0.115300101	1	0.00463228	0.166480817	1	0.005578376	0.45879351	0.999258942	0.007168669	0.86494348	0.995331167	0.004757223	0.221070816	1	0.00703757	1.635611584	0.83714167	0.004384387	0.216031763	1	0.005079289	0.338944224	0.923685271	0.005735379	0.767790384	1	0.007649442	0.987838965	1	0.001199904	-0.961928226	0.738051169	0	1.701677501	1	0	1.236969456	1	0	3.813535311	1
ENSBTAG00000000593	ST8SIA1	0.377571547	0.875723307	0.003709364	0.209340499	-0.128365669	1	0.178974436	-0.378652256	0.532020911	0.263900117	0.256691038	0.89014188	0.257474686	0.207375569	1	0.205987769	-0.149607076	1	0.358916075	0.689143223	0.546717312	0.420024315	0.97430455	0.020453976	0.032168833	-2.912481474	3.33E-12	0.277209987	0.308553594	1	0.139602324	-0.720765826	0.926294955	0.095992333	-1.259129235	0.093512691	0.389110135	0.818086993	1	0.086517865	-1.237632597	1	0	-1.833672088	1
ENSBTAG00000022150	MXRA5	0.003524589	-2.198216343	0.003748401	0.002635582	-2.633074094	0.000118369	0.003368931	-2.272403424	0.000865364	0.008582118	-0.961176285	0.412129692	0.007766058	-1.047506641	0.827799922	0.007135835	-1.20960181	0.443133892	0.154826542	3.383689133	0.020818343	0.01403004	-0.155937014	1	0.093684671	3.467834618	2.51E-23	0.030588688	1.015973536	0.954409037	0.009561803	-0.680426182	1	0.007199425	-1.007277213	0.65278949	0.044897323	1.85181785	1	0.021629466	0.967425941	1	0	1.949781219	1
ENSBTAG00000015346	NASP	2.051751105	-1.035439402	0.003934738	4.908959403	0.371973031	0.552586015	1.998618057	-1.080498803	0.000771464	4.009565352	0.025025608	1	4.762982991	0.299086108	1	6.793314863	0.917624267	0.004953021	4.560345427	0.201833936	0.797281444	1.772169396	-1.205925909	0.030797343	4.869345429	0.336954499	0.491210258	1.452962689	-1.468490714	0.951640972	7.415178253	0.98378107	0.069772478	1.011519209	-2.012900983	0.001244297	1.257125052	-1.658788623	1	3.54723247	-0.166247565	1	3.868877046	-0.098859484	0.724684135
ENSBTAG00000014218	DKK1	0.001762294	-2.632751605	0.004019392	0.001129535	-3.221176302	0.000136533	0	-5.053849137	1.31E-06	0.002145529	-2.406664367	0.008466877	0.001194778	-2.892829413	0.027442735	0.001902889	-2.507708982	0.017750879	0.02111271	1.199512469	0.636794818	0.000876877	-2.88706173	0.065979461	0.111744367	5.791144274	8.78E-51	0.005735379	-0.702660235	1	0.007649442	-0.540540007	1	0	-3.416723435	0.065138269	0	0.263756111	1	0.010814733	0.805253216	1	0	2.375613921	1
ENSBTAG00000009842	CRYM	0.00616803	-1.655668543	0.004034748	0.006400699	-1.640389478	0.001486166	0.003790047	-2.335340448	1.42E-05	0.006436588	-1.601680349	0.005528015	0.008363447	-1.166235503	0.313703284	0.003330056	-2.46616672	0.000144317	0.02815028	0.879090581	0.684649171	0.00350751	-2.194992674	0.017077018	0.144477565	4.547960233	1.08E-64	0.015294344	-0.158920397	1	0.003824721	-2.062595756	0.111387246	0.008399329	-1.028270721	0.427068085	0.014965774	0.628096368	1	0.021629466	0.752341685	1	0	1.735974328	1
ENSBTAG00000006107	SLF1	0.080624963	-1.144102715	0.004085824	0.169806772	0.027167593	1	0.073695356	-1.286258367	0.000270224	0.189664799	0.210361269	0.973962281	0.22282612	0.46295775	0.841107515	0.242618388	0.620883791	0.246887257	0.415216636	1.341329611	0.261776383	0.115747828	-0.550282646	0.695771314	0.190755535	0.213210702	0.728698162	0.135737304	-0.292261631	1	0.260081043	0.687288162	0.519687905	0.195584378	0.243249451	0.830783078	0.089794647	-0.699513873	1	0.086517865	-0.800744197	1	0.135750072	0.188137946	0.724684135
ENSBTAG00000011959	GPR19	0.003524589	-1.876288248	0.004138093	0.019202096	0.673701776	0.345284894	0.005895628	-1.177590161	0.051216931	0.028750094	1.397344527	0.000296215	0.013739948	0.11971584	1	0.012844503	0.003140442	1	0.00703757	0.073458966	1	0.007891897	-0.631965144	0.814745374	0.010158579	-0.338634536	0.796966703	0.026765102	1.154902648	0.951640972	0.014342705	0.214572934	1	0.004799617	-1.184805506	0.423219744	0	0.150662332	1	0	-0.314045713	1	0	2.262520142	1
ENSBTAG00000011759	C1QL1	0.042735636	1.068781381	0.004138093	0.014307444	-0.748495515	0.291810908	0.013896839	-0.778157185	0.1661362	0.031753835	0.546519881	0.465874695	0.025090341	0.156365692	1	0.01427167	-0.722737506	0.763569698	0.00703757	-0.739632326	1	0.049982017	1.240185625	0.014085065	0.007336751	-1.653676245	0.003799977	0.022941516	0.095076684	1	0.022948327	0.03981324	1	0.016798658	-0.387113681	0.974790155	0.014965774	0.34330741	1	0.054073666	1.476707242	1	0	1.451897506	1
ENSBTAG00000048743	ENSBTAG00000048743	0.003524589	-2.311873125	0.004162241	0.022590701	0.436110014	0.858834775	0.006737861	-1.43311703	0.057808314	0.032612047	1.074626686	0.078321278	0.005973891	-1.524163258	0.40053091	0.031397674	0.98819306	0.266974517	0.02815028	0.983226322	0.646010862	0.001753755	-2.836435657	0.043929718	0.026525178	0.683889828	0.334707072	0.013382551	-0.227857591	1	0.033466311	1.030067201	0.615308524	0.004799617	-1.614313488	0.425267448	0	-0.272937181	1	0.010814733	0.26662943	1	0.067875036	2.843195284	0.724684135
ENSBTAG00000014906	VCAN	0.366997782	-1.103751915	0.004197995	0.42583472	-0.890355006	0.013530593	0.173499924	-2.237018006	3.25E-11	0.792987668	0.116717936	1	0.869798474	0.260118449	1	0.534236176	-0.516225758	0.823264573	5.749694774	3.027037065	0.000498962	1.052252981	0.54932737	0.441525327	1.997289461	1.711118499	2.59E-11	0.699716242	-0.079738088	1	1.142635463	0.675145103	0.592221176	0.0863931	-3.135542756	2.16E-06	0.568699428	-0.36298574	1	0.37851566	-0.943479435	1	0.203625108	-1.540124436	0.83932343
ENSBTAG00000012244	TUBA1B	18.85831099	-1.026320169	0.004221754	48.54553464	0.511464089	0.204040162	30.83497922	-0.256167058	0.711262549	48.18472848	0.486588135	0.312327133	29.8258437	-0.298767337	1	39.80463874	0.160316946	1	24.86373517	-0.549665318	1	16.00389097	-1.22364442	0.026903323	46.38350634	0.405169789	0.352412894	17.80644011	-1.041323111	0.951640972	43.57409261	0.289053878	1	38.05616041	0.07946123	1	16.05827596	-1.190219712	1	38.07867539	0.063633899	1	42.28614737	0.137315379	0.724684135
ENSBTAG00000046096	ENSBTAG00000046096	0.003084015	-1.929257103	0.004241074	0.023343725	1.192202736	0.003653876	0.004211163	-1.524647241	0.011474535	0.016306023	0.526752523	0.711794446	0.004181723	-1.439824064	0.237886805	0.017126004	0.604310232	0.943343537	0.00703757	0.193253478	1	0.005261265	-1.041904775	0.504539348	0.022010254	1.013273728	0.040354182	0.015294344	0.505399895	1	0.012430344	0.135884045	1	0.003599712	-1.391741078	0.318368011	0	0.26996126	1	0.010814733	0.811485169	1	0	2.38181907	1
ENSBTAG00000015986	NDE1	0.21367818	-1.093415353	0.004248791	0.730432677	0.948147742	0.000457563	0.137283921	-1.76891549	8.82E-08	0.757800986	0.989687305	0.00053959	0.376355109	-0.199720064	1	0.366781916	-0.245816608	1	0.647456449	0.609209057	0.576274519	0.197297434	-1.159822124	0.077881254	0.519780614	0.314242906	0.559108633	0.711187	0.761977089	0.951640972	0.443667661	0.057700356	1	0.074394058	-2.555575484	8.31E-05	0.658494075	0.636267281	1	0.389330393	-0.112264851	1	0.543000287	0.419798436	0.724684135
ENSBTAG00000009277	RGS17	0.048463092	-1.216635328	0.004359341	0.066266057	-0.752786466	0.125373532	0.067799728	-0.706238519	0.115411617	0.120149647	0.214969519	0.983800931	0.109919587	0.066922512	1	0.077067017	-0.497352301	1	0.372991215	1.861780696	0.137322049	0.117501583	0.170450729	0.97388317	0.269202338	1.59782969	1.11E-08	0.151031648	0.545894673	0.960297367	0.140558505	0.445490809	1	0.041996646	-1.333897004	0.109576186	0.119726195	0.327042356	1	0.064888399	-0.501672716	1	0.135750072	0.849631109	0.724684135
ENSBTAG00000004542	FAM78A	0.005727456	-1.889321572	0.004422824	0.005271164	-2.046224484	0.000606604	0.024845863	0.320622822	0.739870736	0.003861953	-2.432998515	0.000225434	0.007168669	-1.510565655	0.207740863	0.00618439	-1.764278949	0.029561226	0.02111271	0.426617017	0.85737001	0.008768775	-1.162106154	0.458832249	0.02878264	0.553789837	0.40773497	0.032500481	0.746700779	0.960297367	0.002868541	-2.51506932	0.090441628	0.22198227	4.265522332	1.34E-29	0.044897323	1.509556753	1	0.032444199	1.044848709	1	0	1.610443445	1
ENSBTAG00000000648	ADAMTS5	0.315450674	0.892089365	0.004459246	0.10692932	-0.902545797	0.025596198	0.239615186	0.414408331	0.304954411	0.113283953	-0.799322861	0.108304829	0.17204805	-0.131037068	1	0.133202252	-0.539440262	0.911479708	0.724869721	1.986386299	0.095416687	0.294630835	0.708866254	0.20201784	0.190755535	0.031179098	1	0.217944403	0.233849871	1	0.100398932	-0.926986578	0.660436841	0.182385433	-0.03366398	1	0.164623519	-0.083946039	1	0.064888399	-1.328287635	1	0.135750072	0.024267066	0.724684135
ENSBTAG00000008759	CDC23	0.133493791	-1.101168075	0.00459119	0.428846814	0.820579142	0.005535328	0.140231735	-1.030563382	0.003408195	0.388340822	0.623655788	0.118332846	0.195943612	-0.490210197	1	0.329199852	0.334164595	1	0.555968038	1.067722596	0.352325886	0.097333401	-1.51174466	0.011020208	0.330718176	0.334768917	0.474260674	0.27912178	0.062601445	1	0.321276582	0.276220888	1	0.142788595	-0.933359074	0.28908453	0.254418165	-0.018979927	1	0.227109396	-0.193049829	1	0.203625108	-0.081000483	0.724684135
ENSBTAG00000016649	CCND2	2.354425146	0.851041336	0.004638566	1.639708406	0.231870161	0.896492323	1.647407046	0.235487473	0.68928943	1.347821572	-0.097116692	1	1.307087268	-0.141818339	1	1.476166388	0.051357838	1	1.111936076	-0.366415198	1	1.384589548	-0.049874351	1	0.656921428	-1.199743271	0.001180818	0.961631885	-0.585684618	1	0.873948797	-0.742489177	0.732199919	0.872330326	-0.738392947	0.458508412	1.077535758	-0.411110299	1	0.638069255	-1.159442833	1	0.407250215	-1.685224459	0.83562172
ENSBTAG00000017223	MEST	3.150982156	0.849997597	0.004670664	2.158541514	0.202561504	0.953559239	2.531751319	0.470288558	0.188182334	1.537486372	-0.356041321	0.767176354	1.488693542	-0.394136939	1	2.216390332	0.239032544	1	1.39343888	-0.464424376	1	1.267087965	-0.626790753	0.475696241	0.817765592	-1.309757168	0.000346518	2.210032721	0.211581533	1	0.899765666	-1.133282054	0.170420825	1.537077232	-0.330660561	0.875703412	2.798599817	0.536041982	1	1.535692106	-0.325172412	1	1.764750933	-0.158191408	0.724684135
ENSBTAG00000014484	TMEM26	0.015860648	-1.36954692	0.004694113	0.011295351	-1.897223372	8.97E-06	0.013054606	-1.663368742	0.000129905	0.049347176	0.406922509	0.692054504	0.072284076	1.026245007	0.028823212	0.022358949	-0.846339956	0.391800527	0.084450841	1.233689584	0.389255841	0.099087156	1.506893072	0.000248063	0.067159493	0.907604913	0.015426019	0.036324067	-0.033093926	1	0.084143867	1.225902788	0.03407718	0.008399329	-2.07413773	0.019666161	0.014965774	-0.405387477	1	0.021629466	-0.283184749	1	0	0.704524689	1
ENSBTAG00000008134	BDNF	0.061680299	-1.194487796	0.004709131	0.022590701	-2.711149826	2.47E-13	0.015581304	-3.22134606	2.05E-15	0.082388329	-0.753013105	0.176235112	0.17204805	0.422823694	0.982864478	0.051378012	-1.460056438	0.00138914	0.485592337	1.913366003	0.120027172	0.215711861	0.766367921	0.160256995	0.599356148	2.824988089	2.06E-31	0.137649097	0.073499606	1	0.207491126	0.70032371	0.547138016	0.016798658	-2.93854345	9.23E-05	0.149657744	0.292178918	1	0.075703132	-0.633681996	1	0	-1.061124425	1
ENSBTAG00000021135	RMI1	0.116311422	-1.095604709	0.004770055	0.25866353	0.174445303	0.972792027	0.080012101	-1.6675166	6.65E-07	0.30938534	0.474093463	0.342704704	0.279578081	0.289573679	1	0.349655912	0.675536381	0.126796507	0.175939253	-0.364714781	1	0.163099212	-0.53882399	0.69297427	0.321123963	0.517895759	0.17121042	0.227503368	-0.029430994	1	0.374822679	0.736571311	0.381774135	0.061195112	-1.953745022	0.003329223	0.224486616	0.014525644	1	0.194665197	-0.201277782	1	0.33937518	0.70809371	0.724684135
ENSBTAG00000031849	TMEM119	0.033924165	-1.28025394	0.004770055	0.007153722	-3.562543318	4.53E-16	0.009685675	-3.10951948	1.18E-12	0.015447812	-2.441136584	1.33E-08	0.041219845	-0.955166469	0.330566457	0.01427167	-2.534088816	1.28E-07	0.204089533	1.453043909	0.269231899	0.057873914	-0.424470992	0.899682122	0.558157467	4.307309423	4.24E-77	0.107060409	0.504044615	0.970881815	0.026773048	-1.538548709	0.142006375	0.041996646	-0.875466909	0.461491521	0.074828872	0.190323225	1	0.118962065	0.731511762	1	0.135750072	1.299241757	0.724684135
ENSBTAG00000020979	NGFR	0.011895486	-1.602741739	0.004770055	0.00677721	-2.4429083	1.21E-06	0.005053396	-2.817898202	1.57E-07	0.012014965	-1.593077491	0.004760176	0.013142559	-1.408542606	0.138380319	0.007135835	-2.312361384	0.000204506	0.190014393	2.557736693	0.070485896	0.021921937	-0.627849035	0.807284711	0.244370256	4.250938036	7.52E-54	0.051618411	0.655563989	0.960297367	0.008605623	-1.910146077	0.155402936	0.008399329	-1.892387293	0.081231399	0	-1.227408841	1	0.043258933	0.638648573	1	0	0.884448969	1
ENSBTAG00000013802	DAB1	0	-4.04621325	0.004878179	0.001129535	-2.270504015	0.061678514	0.00463228	-0.399116358	0.954734819	0.000429106	-3.077600091	0.023741472	0.000597389	-2.54490611	0.312588543	0.001902889	-1.551148244	0.763569698	0.035187851	2.759600301	0.240608869	0.000876877	-1.947943972	0.498479859	0.02370335	2.38813933	2.68E-05	0.009558965	0.857427597	0.984104183	0	-2.827421155	0.65490745	0.0575954	3.852719188	8.31E-10	0	1.197204918	1	0	0.732496873	1	0	3.309062728	1
ENSBTAG00000016915	FLT1	0.006608604	-1.791432945	0.005002654	0.012424886	-0.899248207	0.264498616	0.005895628	-1.962252497	0.000606825	0.018451553	-0.272952422	1	0.023895562	0.146546631	1	0.012844503	-0.816073564	0.858189823	0.140751402	2.77910846	0.058055431	0.01753755	-0.294974795	1	0.093120305	2.642033814	1.13E-15	0.01911793	-0.091225523	1	0.03155395	0.579754227	1	0.001199904	-3.277051143	0.009012475	0.014965774	0.403428402	1	0.010814733	-0.061279642	1	0	1.511879611	1
ENSBTAG00000054582	ENSBTAG00000054582	0.000440574	-2.922830834	0.00506201	0.009036281	0.792436507	0.47289072	0.000842233	-2.399116358	0.006923549	0.009011224	0.777132809	0.565839925	0.002389556	-1.072299102	0.992467174	0.017126004	1.952233536	0.000183019	0.01407514	1.835549154	0.575222803	0.000876877	-1.836435657	0.307443353	0.005643655	0.056733761	1	0.003823586	-0.06662355	1	0.007649442	0.558995666	1	0.001199904	-1.359892212	0.505038143	0	1.307763293	1	0	0.843055248	1	0	3.419621103	1
ENSBTAG00000048906	ENSBTAG00000048906	0.338801074	0.882651674	0.005173148	0.129520021	-0.722077932	0.124621685	0.193713507	-0.069385767	1	0.177220729	-0.213442746	1	0.219839175	0.134491193	1	0.15936698	-0.378655634	1	0.851545982	2.110006586	0.072974503	0.395471746	1.058930802	0.011760353	0.050228528	-2.102395146	4.64E-07	0.206473645	0.040264137	1	0.138646144	-0.563284787	1	0.233981312	0.225333194	0.853944016	0.329247037	0.747998901	1	0.281183062	0.516123527	1	0.407250215	1.137636873	0.724684135
ENSBTAG00000000265	SYNPR	0.000440574	-2.998118961	0.005199703	0.000376512	-3.258329301	0.001102674	0.001263349	-2.047643988	0.025900879	0.001287318	-2.016717849	0.058387608	0.001792167	-1.484023868	0.643934066	0.001427167	-1.848414284	0.219028376	0.035187851	2.797075006	0.184114202	0.00350751	-0.552642691	0.974120127	0.045713605	4.393427161	1.10E-27	0.015294344	1.518338951	0.951640972	0.001912361	-1.182086036	1	0.002399808	-0.837939509	0.864516227	0.014965774	2.245299206	1	0.010814733	1.780591161	1	0	3.344982302	1
ENSBTAG00000001872	ORC6	0.188565487	-1.068912652	0.005231835	0.414162858	0.18443098	0.978554424	0.162129783	-1.304780785	9.01E-05	0.437687999	0.273357337	0.885503357	0.409808896	0.156974819	1	0.547080679	0.645882904	0.194106572	0.190014393	-0.930436057	1	0.220973126	-0.7820662	0.376995875	0.607257265	0.806339398	0.012433931	0.330740191	-0.166816406	1	0.606218312	0.761083991	0.321112264	0.095992333	-1.984589368	0.002225092	0.329247037	-0.132312548	1	0.367700927	0.011157514	1	0.407250215	0.260068663	0.724684135
ENSBTAG00000032092	CDH11	0.172264265	-1.102304744	0.005231835	0.033886052	-3.5376625	1.13E-22	0.048428377	-2.995907039	1.50E-16	0.163489341	-1.185166147	0.001995305	0.284954583	-0.306612054	1	0.059941013	-2.6635267	2.65E-11	1.491964862	2.137209111	0.060548716	0.644504951	0.97509068	0.021265829	2.002368751	3.498626838	9.11E-59	0.541037422	0.666183431	0.951640972	0.138646144	-1.364401018	0.1163273	0.065994729	-2.422681801	0.000301257	0.389110135	0.198957889	1	0.17303573	-0.935365698	1	0.33937518	0.136293683	0.724684135
ENSBTAG00000003758	TKT	0.775850053	-1.017883538	0.005238962	0.738715934	-1.1111996	0.000551754	0.479651489	-1.753912785	2.22E-08	1.457243572	-0.021673886	1	1.723467444	0.246303257	1	0.920522707	-0.74741685	0.190246373	2.625013648	0.832424858	0.44541357	2.124674145	0.565398628	0.3875195	5.153785634	2.228711468	1.39E-21	1.248400836	-0.248857196	1	1.837778543	0.335896057	1	0.286777095	-2.412072076	0.000113176	1.062569984	-0.477228566	1	2.087243496	0.494342437	1	1.629000862	0.106144073	0.724684135
ENSBTAG00000001725	CXCL10	0.118954863	0.937385902	0.005534759	0.146086535	1.371514565	2.84E-07	0.072432007	0.086355547	0.97789848	0.032612047	-1.166910785	0.011434812	0.034648566	-1.039168758	0.211061835	0.110843303	0.800446647	0.083070528	0.091488411	0.505843709	0.697580265	0.009645652	-2.792846388	5.25E-05	0.014109137	-2.348912962	8.23E-07	0.059265583	-0.183599672	1	0.014342705	-2.240979725	0.00685838	0.015598754	-2.091696101	0.00906119	0.044897323	-0.229609749	1	0.054073666	-0.107154385	1	0.067875036	0.880050505	0.724684135
ENSBTAG00000004305	RGS16	0.007930324	-1.639037868	0.005534759	0.010165816	-1.309798316	0.018971783	0.019792467	-0.277125834	0.865774576	0.006007482	-2.036481104	0.000356854	0.013142559	-0.860704131	0.801352319	0.009514447	-1.362987457	0.073177182	0.02815028	0.549946991	0.789556938	0.009645652	-1.238534101	0.296254224	0.091991575	2.451530116	5.06E-15	0.036324067	0.696573586	0.961534014	0.017211245	-0.420245773	1	0.101991854	2.342346004	1.14E-07	0.029931549	0.889537516	1	0.032444199	0.843055248	1	0.067875036	2.413251578	0.724684135
ENSBTAG00000052532	ENSBTAG00000052532	0.054631122	-1.203617509	0.005534759	0.129896533	0.163366694	1	0.051797307	-1.290071	0.000767173	0.158769176	0.500021576	0.37354323	0.100361362	-0.248917789	1	0.183153097	0.737063833	0.12110812	0.584118319	2.355836504	0.047849974	0.049105139	-1.295538531	0.081885381	0.151249951	0.402523785	0.403248771	0.193091094	0.74580539	0.951640972	0.147251767	0.346017586	1	0.059995208	-0.983399756	0.331915787	0.209520842	0.908128378	1	0.064888399	-0.661267828	1	0.135750072	0.690336246	0.724684135
ENSBTAG00000050102	ENSBTAG00000050102	0.000440574	-2.870363414	0.005750895	0.008283257	0.704932209	0.637979425	0.002526698	-1.068808598	0.247123842	0.008582118	0.757847138	0.591230435	0.000597389	-2.380930375	0.13754259	0.010465891	1.090185171	0.320831196	0.00703757	1.290115018	0.911922258	0.001753755	-1.185585221	0.599532161	0.010158579	1.023935543	0.138008919	0.007647172	0.750512393	1	0.009561803	0.933391181	1	0.001199904	-1.307424792	0.473182851	0	1.359757931	1	0	0.895049886	1	0	3.471615741	1
ENSBTAG00000009709	TAF5	0.135696659	-1.077632561	0.005772374	0.44353077	0.881486511	0.001897776	0.11791257	-1.297219822	0.000132135	0.437687999	0.834215282	0.009020413	0.209683561	-0.387291875	1	0.330151297	0.337344895	1	0.464479627	0.806740389	0.480732423	0.13942352	-0.984730642	0.187322091	0.292341323	0.134094703	0.863378952	0.175884957	-0.61492758	1	0.328926024	0.310973831	1	0.089992812	-1.606391739	0.019136102	0.179589293	-0.491290147	1	0.237924129	-0.130051017	1	0.271500144	0.239800066	0.724684135
ENSBTAG00000007777	OGG1	0.091198729	-1.087461536	0.005991186	0.256780972	0.594523298	0.099498881	0.082117683	-1.25267279	0.000298552	0.239870187	0.462751523	0.375693383	0.169061105	-0.114731667	1	0.293520677	0.802260119	0.032864388	0.154826542	-0.183397938	1	0.083303361	-1.165217423	0.085791701	0.208250865	0.21620116	0.717380332	0.154855234	-0.226687738	1	0.275379927	0.642070424	0.60026783	0.058795304	-1.649305145	0.017640771	0.029931549	-2.047399369	1	0.20547993	0.231945557	1	0.135750072	0.064458441	0.724684135
ENSBTAG00000008430	RANBP3L	0.003084015	-2.057990417	0.006090455	0.002635582	-2.318200757	0.000697052	0.002526698	-2.330675302	0.000659954	0.002145529	-2.527970663	0.000840527	0.000597389	-3.603322796	0.00099144	0.001427167	-2.956217574	0.000784105	0.01407514	0.658421466	0.871010708	0.004384387	-1.398314545	0.387248198	0.113437463	5.241574435	3.56E-56	0.013382551	0.20031531	1	0	-3.879677392	0.019588026	0.003599712	-1.518321575	0.33797242	0.014965774	1.150662332	1	0.043258933	2.025160374	1	0	2.256806491	1
ENSBTAG00000013726	RNPEP	0.320737557	0.85223455	0.006174606	0.221765385	0.221092251	0.915060141	0.160024202	-0.317322267	0.655914572	0.19481407	0.002100897	1	0.174437606	-0.1702227	1	0.232152497	0.289516587	1	0.239277383	0.330364485	0.757080944	0.211327474	0.129478377	1	0.076189341	-1.432462015	0.000415905	0.206473645	0.096431674	1	0.128128161	-0.623999241	1	0.103191758	-0.932961034	0.307048545	0.209520842	0.18308381	1	0.259553595	0.459250045	1	0.135750072	-0.031662962	0.72553667
ENSBTAG00000035175	DONSON	0.160809352	-1.068145561	0.006231554	0.353167964	0.184711852	0.981569496	0.154128573	-1.138141626	0.000950251	0.346717552	0.150319857	1	0.346485656	0.143781634	1	0.526148896	0.855805305	0.018536833	0.71079458	1.183368205	0.306247387	0.1674836	-0.956117904	0.208957382	0.392798379	0.347274565	0.445773451	0.391917567	0.320792747	1	0.515381184	0.756753203	0.343877586	0.1151908	-1.487899824	0.032623975	0.284349714	-0.103998893	1	0.151406264	-0.984943585	1	0.475125251	0.683054539	0.724684135
ENSBTAG00000013111	RRM1	1.20276584	-0.99728603	0.006294817	3.264356345	0.639576523	0.05280833	1.653302675	-0.503966241	0.227388412	2.933796908	0.438834012	0.43420184	1.841153089	-0.320277907	1	2.997526397	0.46814011	0.7010653	2.561675517	0.17734296	0.81482574	0.737453965	-1.674580866	0.002047072	2.707261245	0.291037261	0.592227757	1.846792049	-0.298689643	1	3.162088263	0.518862582	0.924392203	0.987521126	-1.229829312	0.082260662	1.975482224	-0.204018553	1	1.881763566	-0.271383382	1	2.579251364	0.134798184	0.724684135
ENSBTAG00000015016	CALCOCO1	0.398719079	0.858095306	0.006315466	0.172442354	-0.548053838	0.345284894	0.292254726	0.321208112	0.469700855	0.226997011	-0.09863758	1	0.176229773	-0.487045923	1	0.158891258	-0.659730882	0.491845987	0.274465234	0.213061959	0.824757705	0.391087358	0.756154665	0.128160351	0.089169747	-1.519008327	0.00012437	0.303975089	0.349389073	0.994129097	0.12717198	-0.954392718	0.544361034	0.48716109	1.083613166	0.012089568	0.389110135	0.724851308	1	0.075703132	-1.500729881	1	0.407250215	0.882876549	0.724684135
ENSBTAG00000031797	MANF	3.086658415	-0.995153144	0.006361482	4.940586385	-0.261945213	0.887782564	4.499206769	-0.408236031	0.39196276	5.22136036	-0.167998803	1	5.221180401	-0.162257967	1	5.666328665	-0.034269448	1	9.106615713	0.651717259	0.720205679	3.371593928	-0.817746902	0.24641992	15.08379639	1.641761246	5.86E-11	4.324475791	-0.43228408	1	8.138050562	0.525546641	0.906814773	3.669306929	-0.682143669	0.423552432	3.11288108	-0.911042349	1	5.75343803	-0.020859775	1	5.2942528	-0.204467864	0.724684135
ENSBTAG00000020432	MIS12	0.088114714	-1.096965097	0.006431489	0.215364686	0.333949048	0.679164824	0.08927666	-1.082031213	0.002577227	0.233862705	0.46743395	0.378655833	0.15950288	-0.16172447	1	0.234055386	0.461655426	0.75229091	0.204089533	0.243671385	0.811501748	0.079795851	-1.186757191	0.083855577	0.278232185	0.739315281	0.02659557	0.198826473	0.181559289	1	0.2524316	0.550002053	0.823299827	0.081593483	-1.135320163	0.162872552	0.239452391	0.501589017	1	0.162220997	-0.051011307	1	0.407250215	1.329050274	0.724684135
ENSBTAG00000053253	ENSBTAG00000053253	0.051106534	-1.168438678	0.00644813	0.052711636	-1.141521904	0.00316561	0.026109212	-2.175279075	8.07E-09	0.120149647	0.179649858	1	0.228800011	1.248974248	0.000315517	0.098950245	-0.136383713	1	0.351878505	1.745884308	0.162873911	0.189405537	0.885413151	0.074174516	0.093684671	-0.218189411	0.898450228	0.152943441	0.532853108	0.960297367	0.322232762	1.755164237	5.24E-06	0.008399329	-3.554649067	6.97E-06	0.104760421	0.125830479	1	0.032444199	-1.341688468	1	0.135750072	0.819138017	0.724684135
ENSBTAG00000030965	MCM7	1.495747262	-0.994254391	0.006544355	3.478968007	0.36926346	0.563864566	1.505490846	-0.988723635	0.002452975	3.409246224	0.326649123	0.741330354	3.172733308	0.197017997	1	4.067425916	0.620168625	0.219028376	5.594868232	1.000031833	0.363167196	1.338991919	-1.113012498	0.055136626	3.557760035	0.38423755	0.397096743	2.009294455	-0.492802106	1	4.299942824	0.662165528	0.580562225	0.908327451	-1.669121286	0.009320142	1.706098284	-0.726736447	1	2.541462288	-0.151008786	1	3.733126975	0.34538828	0.724684135
ENSBTAG00000026972	MYF5	2.306402627	0.831372916	0.00654726	1.045949472	-0.497280349	0.371045079	1.307987292	-0.130602423	0.948074328	1.612579901	0.215123931	0.977966326	1.844737423	0.423547322	0.940324701	1.306333516	-0.130643771	1	1.083785796	-0.389410485	1	2.335124741	0.781510203	0.115930987	0.194706093	-2.981792053	2.66E-14	0.906189887	-0.658601165	1	1.582478402	0.169383253	1	0.854331764	-0.754973696	0.440945553	1.107467307	-0.358074839	1	1.65465417	0.219429533	1	1.561125826	0.107193236	0.724684135
ENSBTAG00000003202	OPRD1	0.003965162	-1.821453814	0.006624475	0.00451814	-1.686473789	0.005174591	0.004211163	-1.752599187	0.003090184	0.009440329	-0.589371208	0.7453355	0.016129505	0.256499546	1	0.013795948	0.00356797	1	0.056300561	2.18150452	0.196114893	0.008768775	-0.592016929	0.852921988	0.05756528	2.577985774	4.43E-15	0.021029723	0.710984029	0.979349477	0.019123606	0.529849321	1	0.010799137	-0.258515192	1	0	0.051126658	1	0	-0.413581386	1	0	2.162984468	1
ENSBTAG00000000030	RDM1	0.108381098	-1.069860625	0.006624475	0.391572157	1.080587301	3.66E-05	0.106121313	-1.107158903	0.001484099	0.331698846	0.748328498	0.023434155	0.145762931	-0.592910244	0.848029366	0.244997	0.22313244	1	0.154826542	-0.416209984	1	0.069273321	-1.671493508	0.004020333	0.279925282	0.435563883	0.293058976	0.133825511	-0.675009592	1	0.231395633	0.123870403	1	0.073194154	-1.569165881	0.023353093	0.149657744	-0.401665763	1	0.20547993	-0.000679631	1	0.33937518	0.833949487	0.724684135
ENSBTAG00000012481	RANGAP1	0.155522469	-1.066513611	0.00674037	0.525233806	0.957329328	0.000454632	0.235404023	-0.42369344	0.433064001	0.404646846	0.469763349	0.394171995	0.181008886	-0.809874108	0.356496976	0.282579064	-0.12738564	1	0.66856916	1.144890457	0.319881687	0.090318381	-1.811700995	0.001477376	0.366837567	0.292137153	0.558547414	0.562067145	0.913294031	0.951640972	0.292591173	-0.065564145	1	0.197984187	-0.644848673	0.597573447	0.628562526	1.055856402	1	0.227109396	-0.380911489	1	0.271500144	0.05393352	0.724684135
ENSBTAG00000012509	DYRK1B	0.054631122	1.007958029	0.006768094	0.03125047	0.050846887	1	0.046322795	0.7190565	0.062356143	0.021026188	-0.575576596	0.609709896	0.025090341	-0.279262902	1	0.018553171	-0.755968036	0.632453638	0.056300561	1.047509375	0.510358125	0.032444467	0.126089638	1	0.012416041	-1.324492335	0.016788787	0.024853309	-0.204633371	1	0.009561803	-1.599643527	0.213839875	0.052795783	0.865174344	0.195914335	0.014965774	-0.056933087	1	0	-1.524117862	1	0	1.052447992	1
ENSBTAG00000000942	SIPA1L2	0.040092195	-1.215795446	0.006768094	0.062124429	-0.555235672	0.451482988	0.024845863	-1.93561737	7.99E-07	0.123153388	0.578646247	0.240282741	0.096179639	0.155386417	1	0.053756623	-0.76116962	0.445885177	0.295577944	1.803268739	0.161532116	0.111363441	0.380332215	0.724215767	0.202042845	1.415190734	2.04E-06	0.151031648	0.82994686	0.951640972	0.116653997	0.450573207	1	0.058795304	-0.570459198	0.75422201	0.074828872	0.012465038	1	0.075703132	-0.035470456	1	0.203625108	1.53762738	0.724684135
ENSBTAG00000018189	CSTB	0.412376859	-1.006575504	0.006788779	0.565144045	-0.526163719	0.318992854	0.366371199	-1.192971928	0.000356668	1.064182585	0.524811508	0.252782319	1.308282046	0.844709244	0.048699482	0.686467321	-0.203985223	1	0.66153159	-0.232982228	1	1.032961677	0.436597405	0.621917476	0.997233817	0.397623331	0.383431189	0.678686519	-0.203509605	1	1.652279564	1.180658271	0.010895357	0.20758342	-1.949683245	0.002402299	0.448973233	-0.771950614	1	0.821919719	0.080420177	1	1.086000574	0.471810397	0.724684135
ENSBTAG00000006877	MMP16	0.054190549	-1.122005596	0.00695206	0.10467025	-0.095485991	1	0.055166238	-1.100192166	0.00292728	0.128302658	0.242739133	0.940199921	0.096179639	-0.219145762	1	0.088008631	-0.366406927	1	0.323728225	1.584176319	0.196915816	0.077165219	-0.539189241	0.71838375	0.296856247	1.690650772	1.60E-10	0.149119855	0.453672228	0.971181761	0.15776975	0.548357551	0.869159562	0.029997604	-1.882074918	0.008656814	0.059863098	-0.594523769	1	0.054073666	-0.795514152	1	0.067875036	0.193358117	0.768046272
ENSBTAG00000018530	TUBA8	0.062120873	0.96549293	0.007038578	0.041039774	0.25338862	0.93815425	0.048428377	0.53132689	0.22611461	0.030466518	-0.234364558	1	0.025090341	-0.512661073	1	0.025213283	-0.523258167	1	0.02815028	-0.029674167	1	0.029813834	-0.230714596	1	0.008465482	-2.08906239	5.68E-05	0.024853309	-0.427025793	1	0.019123606	-0.866310168	0.910887529	0.067194633	0.999581954	0.072797802	0.029931549	0.31202532	1	0.010814733	-0.739777813	1	0.067875036	1.836788042	0.724684135
ENSBTAG00000049416	RAB20	0.017622943	-1.29125364	0.00707834	0.010165816	-2.126752043	3.27E-07	0.00463228	-3.193415128	2.76E-11	0.04162327	0.038120476	1	0.065712797	0.778204038	0.236708195	0.019504616	-1.129497327	0.071347622	0.042225421	0.254304942	0.900381154	0.081549606	1.099243362	0.021524866	0.159715433	2.473547857	1.24E-20	0.049706618	0.337384484	1	0.033466311	-0.269790636	1	0.005999521	-2.567487631	0.00308713	0.029931549	0.107425238	1	0.043258933	0.383391517	1	0	0.630621327	1
ENSBTAG00000003454	RGS20	0.020266384	-1.24036716	0.007461327	0.01995512	-1.287910291	0.001732189	0.029478142	-0.676540494	0.169608473	0.021026188	-1.189072932	0.011870042	0.040622456	-0.157763352	1	0.047572233	0.086577612	1	0.070375701	0.762967152	0.640919482	0.025429447	-0.831273952	0.453683589	0.183418784	2.55304604	1.97E-23	0.034412274	-0.337163126	1	0.065976441	0.594163286	0.898958554	0.025197987	-0.815913203	0.485067329	0.029931549	-0.041982746	1	0.054073666	0.498327284	1	0	0.481576851	1
ENSBTAG00000017405	RORC	0.005727456	2.168317054	0.00752312	0.000753023	-0.878186592	0.865105814	0.002947814	0.952356012	0.585496887	0.002574635	0.741727473	0.966628708	0.001792167	0.329563008	1	0.000475722	-1.119716306	1	0	1.875077518	1	0.000876877	-0.158363752	1	0	-1.886122331	0.30941785	0.001911793	1.013546799	1	0	-1.066608819	1	0.001199904	0.318179693	1	0	2.958017254	1	0	2.493309209	1	0	5.069875064	1
ENSBTAG00000054812	HIST1H2BJ	0.005727456	-1.602741739	0.007565932	0.021461166	0.405479147	0.780547137	0.00463228	-1.90848124	0.000389943	0.031324729	1.062031825	0.012139183	0.008960836	-0.911445091	0.671923839	0.035203452	1.255391827	0.002823579	0	-1.308144306	0.983878059	0.00350751	-2.042542995	0.04008544	0.014109137	-0.254162351	0.900192995	0.024853309	0.655563989	0.980210086	0.033466311	1.083416625	0.246607818	0.004799617	-1.56599955	0.168440706	0.014965774	0.779214101	1	0.010814733	0.314506057	1	0	1.88665324	1
ENSBTAG00000024874	MAD2L1	0.002202868	-2.014329188	0.007641371	0.016566514	0.986883828	0.058268733	0.002526698	-1.858041502	0.005840201	0.018880659	1.203833226	0.013643652	0.008363447	-0.128543213	1	0.011417336	0.331494806	1	0.00703757	0.529302681	1	0.00350751	-1.199005736	0.42964323	0.015802234	0.856381446	0.16926221	0.007647172	-0.027095186	1	0.005737082	-0.565062326	1	0.002399808	-1.475369429	0.314300764	0	0.604380299	1	0.010814733	1.147534373	1	0	2.716238109	1
ENSBTAG00000012007	SOCS2	0.063883167	-1.146634204	0.007685728	0.092998387	-0.579468391	0.366337315	0.039163818	-1.887148184	3.57E-07	0.174646094	0.460441362	0.449241257	0.164281992	0.342290881	1	0.091338687	-0.590269066	0.832073598	0.147788972	0.210387825	0.832351959	0.140300398	0.089947849	1	0.386590359	1.854899285	3.70E-12	0.185443922	0.507833603	0.960797701	0.148207947	0.173792214	1	0.033597317	-1.984575142	0.007565566	0.149657744	0.287021314	1	0.129776798	0.064465911	1	0.271500144	1.257947412	0.724684135
ENSBTAG00000003616	DCLRE1B	0.014538928	-1.304137476	0.007767775	0.035392099	0.067464884	1	0.011370141	-1.672326918	0.000110545	0.04162327	0.337031918	0.845005253	0.029869453	-0.189631722	1	0.041387843	0.324340087	1	0.01407514	-0.716548713	1	0.026306325	-0.357972778	0.956684713	0.076189341	1.354457224	2.36E-05	0.034412274	0.080144547	1	0.057370818	0.822165226	0.449602492	0.016798658	-0.965318815	0.401845144	0.029931549	0.366391023	1	0.010814733	-0.685493943	1	0.135750072	2.478248833	0.724684135
ENSBTAG00000007402	ZFAND2A	0.03216187	-1.243644448	0.007772847	0.088856759	0.369673784	0.687661583	0.037058236	-1.034730111	0.015423544	0.103414517	0.623135272	0.195946934	0.06392063	-0.170363389	1	0.085630019	0.296308378	1	0.281502804	2.028601869	0.116547739	0.032444467	-1.158363752	0.188384077	0.083526092	0.25148878	0.710212731	0.110883995	0.671223483	0.954409037	0.108048374	0.643884564	0.755611583	0.033597317	-1.08149654	0.30275256	0.149657744	1.181168869	1	0.064888399	0.060137781	1	0.067875036	0.824058297	0.724684135
ENSBTAG00000000436	TNFAIP3	0.014538928	-1.370087739	0.007799412	0.018072561	-1.069315437	0.034897917	0.006316745	-2.571205944	8.52E-08	0.0291792	-0.312307242	1	0.037038122	0.075112646	1	0.019980338	-0.886096629	0.385036829	0.091488411	1.466495041	0.314012307	0.026306325	-0.423612579	0.923815153	0.125853504	2.248807249	8.19E-15	0.065000962	0.93226283	0.951640972	0.088924768	1.455781211	0.005072393	0.019198467	-0.844452816	0.552176235	0.044897323	0.720674491	1	0.010814733	-0.748276777	1	0	0.826172136	1
ENSBTAG00000049253	SEC14L6	0	-3.623270552	0.007928358	0.004894652	0.146266452	1	0.00800121	0.962340101	0.239222766	0.000858212	-2.049507784	0.132372754	0.002389556	-0.747058273	1	0.013795948	1.962260996	0.002809352	0.00703757	1.553149423	0.816311362	0.005261265	0.368883251	1	0.000564365	-2.208050426	0.092906422	0.003823586	0.252058885	1	0.007649442	0.898201753	1	0.005999521	0.606160456	0.918555507	0	1.620147615	1	0	1.155439571	1	0	3.732005425	1
ENSBTAG00000015214	CA3	0.227776534	0.874117491	0.007958499	0.133285138	-0.039720323	1	0.110753592	-0.338178093	0.649144118	0.151903482	0.177229075	1	0.144568153	0.092976382	1	0.122260639	-0.17580816	1	0.112601122	-0.205156541	1	0.270078265	1.077475366	0.012213064	0.015237868	-3.24031923	4.01E-12	0.091766065	-0.562132461	1	0.117610177	-0.219193527	1	0.085193196	-0.68924365	0.60093747	0.119726195	-0.044207411	1	0.140591531	0.131295833	1	0.135750072	0.47935732	0.724684135
ENSBTAG00000047147	CRYBG3	0.048903666	-1.191527976	0.007977357	0.079820478	-0.445107652	0.68737193	0.045059446	-1.321234186	0.000767613	0.104701835	-0.000176044	1	0.077660578	-0.461442426	1	0.066125404	-0.723012612	0.5258541	0.626343739	2.636743553	0.021165615	0.095579646	-0.132654669	1	0.316044673	1.923806534	2.01E-12	0.135737304	0.399117389	0.98949521	0.143427046	0.488411367	1	0.074394058	-0.495610222	0.845152604	0.119726195	0.337865325	1	0.064888399	-0.490860561	1	0.067875036	0.274737309	0.738241556
ENSBTAG00000046314	TBC1D8B	0.10617823	-1.057311707	0.008051195	0.239461434	0.240758644	0.865105814	0.088434427	-1.341238684	9.20E-05	0.322258517	0.747943924	0.025005815	0.234773901	0.195513447	1	0.196473322	-0.089329947	1	0.401141496	0.972615767	0.400422453	0.194666802	-0.096231689	1	0.326203252	0.737561264	0.024650385	0.103236823	-1.007286705	0.954409037	0.324145123	0.690534657	0.490455465	0.049196071	-2.096489725	0.00179831	0.149657744	-0.360263064	1	0.108147331	-0.824971108	1	0.271500144	0.61190145	0.724684135
ENSBTAG00000010472	TNFAIP8L3	0.058155711	-1.094304623	0.008051195	0.071913733	-0.783662087	0.071500893	0.029057026	-2.137195573	2.93E-09	0.1313064	0.194214944	1	0.154126378	0.446053354	0.882443625	0.08372713	-0.526345651	0.938347476	0.063338131	-0.749413347	1	0.141177275	0.296748798	0.809138703	0.33015381	1.795564941	3.22E-12	0.154855234	0.431603542	0.977833535	0.19027988	0.75990836	0.381774135	0.041996646	-1.481960099	0.045960996	0.149657744	0.471679922	1	0.162220997	0.550794704	1	0.067875036	0.118266548	0.777646748
ENSBTAG00000013988	BID	0.601823493	-0.978071326	0.008161126	0.934502012	-0.293881871	0.847299976	0.558821357	-1.096843257	0.00067083	1.19076882	0.106690168	1	1.446876308	0.415867056	0.969710704	1.562747852	0.558701857	0.385636727	0.830433272	-0.427389681	1	0.970703375	-0.213401137	1	1.750661743	0.735648213	0.024487024	1.322960764	0.252058885	1	1.904711164	0.830797003	0.236762898	0.473962144	-1.271355537	0.070198505	0.942843789	-0.243017538	1	1.10310278	-0.018567091	1	1.49325079	0.389613228	0.724684135
ENSBTAG00000002087	IL36A	0	-3.744832532	0.00828968	0.001506047	-1.623613765	0.276543603	0.000421116	-2.804372837	0.015271471	0.001287318	-1.743699354	0.27464971	0.004181723	-0.149604829	1	0	-3.619789909	0.036397533	0.01407514	2.030052178	0.53354763	0.007891897	0.800994264	0.745467378	0.02878264	3.399279887	2.34E-11	0.017206137	1.972904814	0.951640972	0.011474164	1.360812405	0.60065187	0	-2.18189391	0.417262369	0	1.498585635	1	0	1.033877591	1	0	3.610443445	1
ENSBTAG00000000736	LRP8	0.043616783	-1.173792408	0.008319099	0.081326525	-0.211256448	1	0.045901679	-1.101790237	0.005491901	0.0948324	0.043221975	1	0.104543086	0.198577696	1	0.132250808	0.595499091	0.416756344	0.337803365	1.91403804	0.129309914	0.078918974	-0.231231475	1	0.109486905	0.273665518	0.645002986	0.147208062	0.707132846	0.951640972	0.196973143	1.190397927	0.022211409	0.038396933	-1.26719911	0.149127154	0.149657744	0.810118559	1	0.075703132	-0.116485144	1	0.135750072	1.040945807	0.724684135
ENSBTAG00000050785	ENSBTAG00000050785	0.020706958	-1.225741703	0.00835396	0.041416286	-0.162470967	1	0.021476932	-1.177473584	0.004428051	0.045914329	0.009310861	1	0.048985903	0.116001362	1	0.08372713	1.025961149	0.005318952	0.063338131	0.607042431	0.709476335	0.027183202	-0.751888266	0.521836426	0.060951473	0.467024494	0.336470838	0.047794825	0.110254212	1	0.109004555	1.375159046	0.004267032	0.01439885	-1.606985074	0.058879794	0	-1.646844804	1	0.021629466	-0.523292758	1	0.067875036	1.466660859	0.724684135
ENSBTAG00000005347	GPN3	0.176229427	-1.030498431	0.008538813	0.544812414	0.835870294	0.003823291	0.214348207	-0.731556772	0.057042365	0.414087175	0.336129669	0.741330354	0.270617245	-0.349279053	1	0.406742592	0.301369159	1	0.344840935	0.04500252	0.917712752	0.144684785	-1.271508769	0.042134255	0.496641629	0.623598302	0.070651343	0.168237785	-1.016474625	0.954409037	0.426456415	0.355979251	1	0.163186966	-1.078615243	0.173860158	0.059863098	-2.204094293	1	0.465033525	0.477457747	1	0.543000287	0.75665609	0.724684135
ENSBTAG00000023659	MT2A	2.122683449	-0.975777787	0.008538813	3.411948927	-0.234484897	0.948079707	1.426320978	-1.587465147	4.19E-07	3.664135118	-0.114719487	1	6.309025883	0.769255996	0.10187798	5.276712077	0.487605879	0.628361763	2.06904561	-0.935611503	1	3.446128514	-0.201409651	1	5.082675583	0.414833653	0.340776021	3.632406721	-0.118377297	1	10.50459681	1.565105086	2.90E-05	0.387569044	-3.397310849	8.90E-08	2.304729261	-0.783826631	1	7.278315403	0.882010717	1	5.430002872	0.39032739	0.724684135
ENSBTAG00000016547	CEP57	0.23218227	-1.020178948	0.008597536	0.547447996	0.36189919	0.604345153	0.231613976	-1.028649524	0.002743563	0.568565292	0.418494362	0.515002085	0.374562942	-0.262159461	1	0.622720529	0.566041039	0.387190787	0.232239813	-0.90405171	1	0.284985182	-0.66583878	0.516007266	0.660307621	0.650580948	0.065822067	0.481771839	0.127409254	1	0.635859902	0.558995666	0.752369504	0.158387349	-1.516671837	0.024963249	0.374144361	-0.209508111	1	0.335256727	-0.373626236	1	0.610875323	0.52109596	0.724684135
ENSBTAG00000031774	HIST1H1E	0.047141372	-1.106262734	0.008624566	0.123495834	0.439363063	0.42236274	0.055166238	-0.870635131	0.027847849	0.150187058	0.771069558	0.026539062	0.082439691	-0.226490621	1	0.129396474	0.50241101	0.647373428	0.091488411	0.029786611	0.964371341	0.022798815	-2.086370538	0.000656911	0.123031676	0.409333552	0.368410017	0.086030686	-0.130459024	1	0.143427046	0.632637109	0.677600846	0.035997125	-1.407305155	0.067891583	0.074828872	-0.116025071	1	0.097332598	0.159408473	1	0.067875036	0.407701219	0.749149455
ENSBTAG00000021301	ACSF2	0.521198531	0.828362407	0.008640029	0.299703305	-0.112018151	1	0.446804416	0.561980567	0.092012928	0.263900117	-0.315066223	0.912102502	0.24851385	-0.396605763	1	0.278773285	-0.223930482	1	0.457442057	0.52858617	0.629225462	0.339351587	0.089032676	1	0.159151068	-1.079581422	0.008297283	0.156767027	-1.038876279	0.954409037	0.194104602	-0.751735481	0.87561802	0.465562815	0.569541865	0.332567359	0.224486616	-0.444757971	1	0.248738862	-0.322607726	1	0.271500144	-0.013574715	0.724684135
ENSBTAG00000025181	CCDC85C	0.020266384	-1.30066767	0.008878717	0.047440473	0.014945935	1	0.011370141	-2.15379754	9.69E-07	0.075951741	0.81715069	0.047248359	0.057946739	0.33761528	1	0.021407505	-1.20833832	0.049679978	0.190014393	2.080867972	0.121254561	0.058750791	0.354478533	0.797077681	0.081832996	0.911384805	0.014667169	0.10132503	1.169796863	0.951640972	0.069801162	0.619282591	0.871908356	0.007199425	-2.55092624	0.003926291	0.104760421	1.323811234	1	0.043258933	0.176198131	1	0	0.42441677	1
ENSBTAG00000033748	IL18RAP	0	-3.473027917	0.008910052	0	-3.733238256	0.001713695	0.001263349	-1.493443741	0.14245407	0.003003741	-0.387555544	1	0.004779112	0.334428763	1	0.004281501	0.141670247	1	0.00703757	1.705152517	0.814456605	0.005261265	0.530346674	0.977189068	0.019752792	2.89913882	1.05E-09	0.005735379	0.839049067	1	0.007649442	1.063787818	0.97983808	0	-1.910089295	0.344544153	0.014965774	2.788092253	1	0	1.305682206	1	0	3.882248061	1
ENSBTAG00000040116	H1FX	0.059918005	-1.080164596	0.008976841	0.192397473	0.839678903	0.004482946	0.057692936	-1.143184674	0.001602325	0.196101388	0.85233045	0.007444622	0.089608359	-0.440885259	1	0.134153697	0.193498959	1	0.070375701	-0.640861197	1	0.054366404	-1.163588547	0.099824076	0.15632924	0.438402875	0.316031202	0.130001925	0.143483358	1	0.130040521	0.138627498	1	0.045596358	-1.394484612	0.064680283	0.044897323	-1.021804864	1	0.064888399	-0.677251761	1	0.067875036	0.088783527	0.781106011
ENSBTAG00000008925	MRE11	0.117192569	-1.043819617	0.009126036	0.28313679	0.375478975	0.541817063	0.095593405	-1.359587994	6.87E-05	0.316251034	0.557365459	0.186073527	0.257474686	0.199586221	1	0.343947244	0.692428975	0.112912762	0.323728225	0.534511882	0.627631435	0.140300398	-0.724341454	0.460037381	0.250013911	0.153406033	0.826652953	0.059265583	-1.927291129	0.951640972	0.414026071	0.93634904	0.101886746	0.065994729	-1.807228506	0.007537531	0.13469197	-0.627613006	1	0.140591531	-0.605558395	1	0.271500144	0.482576755	0.724684135
ENSBTAG00000048062	KDM6B	0.763073419	0.824398848	0.009142032	0.330577263	-0.576285014	0.27727772	0.597564059	0.401663413	0.326426242	0.341568281	-0.515184682	0.487862143	0.42653579	-0.153547219	1	0.253084279	-0.973244976	0.047533163	1.513077572	1.705812336	0.140931108	0.708517008	0.638153807	0.25196022	0.384332897	-0.317635934	0.702535331	0.713098793	0.621953818	0.951640972	0.3155395	-0.600974073	1	0.485961186	0.050415135	1	0.688425623	0.560835717	1	0.270368328	-0.76141661	1	0.271500144	-0.566749556	0.729643096
ENSBTAG00000014907	IL11RA	0.04934424	-1.142354296	0.009340106	0.050076055	-1.140112268	0.00362928	0.045480563	-1.271665506	0.000878144	0.049347176	-1.145461623	0.008751552	0.056751961	-0.901391427	0.337123936	0.055659513	-0.950926151	0.12110812	0.429291776	2.112740134	0.086525301	0.054366404	-0.937497185	0.312389099	0.545177061	3.252807518	3.19E-43	0.145296269	0.534635009	0.960297367	0.052589917	-0.980353085	0.64088783	0.044396454	-1.209244398	0.168994337	0.074828872	-0.215613619	1	0.118962065	0.324126526	1	0	-0.692414686	1
ENSBTAG00000011662	SOX18	0.004846309	2.562595993	0.009340106	0.000753023	-0.375686251	1	0.000421116	-0.833519183	0.792772469	0	-1.859176572	0.587425115	0.000597389	-0.269899062	1	0.001427167	0.486004755	1	0	2.344562802	1	0.001753755	0.970919265	0.915504998	0.001693096	0.760240714	0.849769308	0	0.442390097	1	0.00095618	0.459459993	1	0	-0.252977008	1	0	3.427502537	1	0.010814733	4.019378021	1	0	5.539360347	1
ENSBTAG00000040028	OBSCN	0.001321721	-2.808962869	0.009417341	0.000753023	-3.491163469	0.000489493	0.003790047	-1.518786589	0.141279607	0.001716424	-2.523309286	0.021749254	0	-4.34028839	0.007589658	0.003330056	-1.655769206	0.432048	0.035187851	1.950484921	0.38514091	0.002630632	-1.722567692	0.521469998	0.000564365	-3.423556462	0.004505304	0.013382551	0.477493898	1	0	-3.610929335	0.2325737	0.196784283	6.290222968	1.43E-38	0.044897323	2.434455298	1	0.010814733	0.955875079	1	0	2.525554548	1
ENSBTAG00000001094	MTUS2	0.11851429	0.867261999	0.009442001	0.08245606	0.247063774	0.886981356	0.021476932	-1.845675245	9.85E-07	0.071660682	0.010785666	1	0.074076244	0.065945813	1	0.065173959	-0.140474866	1	0.02111271	-1.363327221	1	0.119255338	0.809208084	0.126534894	0.063208935	-0.183730747	0.941509636	0.078383513	0.167732487	1	0.076494424	0.118985639	1	0.013198946	-2.367386749	0.001695797	0.089794647	0.530155714	1	0.054073666	-0.158008294	1	0	-0.171710923	1
ENSBTAG00000018404	PRKG1	0.126444614	0.917457977	0.00952163	0.056853265	-0.429254933	0.72637097	0.092645591	0.377861239	0.453131695	0.06350767	-0.244490003	1	0.05734935	-0.389169661	1	0.082299963	0.176385801	1	0.422254206	2.573793733	0.03249991	0.080672729	0.142663325	1	0.027089543	-1.516172722	0.001604157	0.043971239	-0.713076851	1	0.03059777	-1.283787302	0.353933145	0.092392621	0.349160636	0.736178314	0.044897323	-0.333537192	1	0.021629466	-1.214305561	1	0	-0.224745685	1
ENSBTAG00000009155	SCN5A	0.019825811	1.228176954	0.009543949	0.009789304	0.021649246	1	0.013896839	0.6031791	0.393098789	0.006007482	-0.711277877	0.647290706	0.005973891	-0.65846435	1	0.016650282	0.903367307	0.32498109	0	-0.524853089	1	0.006138142	-0.544780573	0.888049551	0.001128731	-2.685823681	0.001146809	0.015294344	0.804960177	0.980210086	0.001912361	-1.866310168	0.405568172	0.005999521	-0.49895625	0.955038179	0.029931549	2.158315905	1	0	0.093378603	1	0	2.669944457	1
ENSBTAG00000013774	CCDC9B	0.09384217	0.942996491	0.009618085	0.029744423	-0.954624964	0.052574504	0.056008471	0.059442574	1	0.033041153	-0.77721648	0.237357386	0.049583292	-0.128543213	1	0.045669344	-0.265501795	1	0.211127103	2.026219044	0.130008114	0.080672729	0.628964116	0.402355548	0.016930965	-1.734980806	0.000502134	0.126178339	1.288566151	0.951640972	0.029641589	-0.868227371	0.926294955	0.118790512	1.22095418	0.014227848	0.059863098	0.440041733	1	0.010814733	-1.350786259	1	0	0.224385013	1
ENSBTAG00000020575	IFITM5	0.004846309	2.662131667	0.009664342	0.001506047	0.553924421	1	0.000842233	-0.128262448	1	0	-1.802593043	0.739460345	0	-1.269899062	1	0	-1.634289479	1	0	2.40114633	1	0.000876877	0.385956764	1	0	-1.36005352	0.676912595	0.001911793	1.557867315	1	0.00095618	0.518353682	1	0.003599712	1.988031091	0.393293254	0	3.484086066	1	0.010814733	4.07827171	1	0	5.595943876	1
ENSBTAG00000011382	SLC9A3R1	0.12600404	-1.036041444	0.009754045	0.230801665	-0.086212268	1	0.234982907	-0.055188785	1	0.195672282	-0.350592495	0.867133829	0.156515934	-0.680541448	0.621417748	0.252132835	0.060022985	1	0.211127103	-0.168846438	1	0.111363441	-1.166392126	0.084219683	0.100457057	-1.353267395	0.000755685	0.223679782	-0.115037407	1	0.225658552	-0.109916239	1	1.443484707	2.937510198	4.32E-22	0.179589293	-0.345295163	1	0.20547993	-0.186327271	1	0.271500144	0.385555011	0.724684135
ENSBTAG00000004727	PAQR4	0.056393417	-1.075073558	0.009866615	0.083962107	-0.469198137	0.547778432	0.082117683	-0.496794086	0.329674385	0.088824917	-0.371186472	0.844970985	0.125451703	0.184413586	1	0.168881427	0.687638616	0.143696652	0.147788972	0.458674477	0.708334481	0.079795851	-0.50269826	0.762944191	0.159715433	0.578681406	0.1261927	0.143384476	0.382328707	0.994129097	0.175937176	0.704699581	0.497546148	0.165586774	0.602785165	0.32919997	0.089794647	-0.120663057	1	0.17303573	0.70152918	1	0.135750072	0.766094316	0.724684135
ENSBTAG00000015209	MXD4	1.804589333	0.803476049	0.009926937	0.594511957	-1.026974148	0.001733231	1.330306457	0.278698915	0.592413961	0.927726915	-0.313912985	0.867133829	1.424772913	0.377135038	1	0.901969536	-0.354702961	1	0.570043178	-0.979393925	1	1.998403787	0.900529937	0.043474784	0.645069753	-0.864665023	0.029466647	1.514140065	0.440921421	0.968452876	0.94566232	-0.264647835	1	0.749940101	-0.607230453	0.620147524	1.721064059	0.606274133	1	1.10310278	-0.030793969	1	1.832625969	0.661562174	0.724684135
ENSBTAG00000012016	LMTK3	0.060799152	-1.067326649	0.009927568	0.059865359	-1.110395872	0.002381072	0.053060656	-1.279796256	0.000340178	0.110280211	-0.136194285	1	0.186982776	0.720210645	0.193797832	0.08991152	-0.456751293	1	0.035187851	-1.527381915	0.967931263	0.119255338	-0.003181256	1	0.300806805	1.566421472	4.15E-09	0.183532129	0.644052561	0.954409037	0.277292288	1.323128769	0.002387248	0.022798179	-2.379085777	0.00072409	0.119726195	0.142416526	1	0.183850463	0.683412093	1	0.135750072	0.665521916	0.724684135
ENSBTAG00000009348	OIT3	0.014538928	1.372074087	0.009927568	0.005647675	-0.221176302	1	0.011370141	0.931191402	0.124012867	0.004291059	-0.606195831	0.896057178	0.002389556	-1.281394701	0.63327795	0.005232946	-0.300288552	1	0.01407514	1.62996502	0.626576078	0.007891897	0.373984123	1	0.000564365	-2.727424585	0.005557362	0.007647172	0.487477987	1	0.002868541	-0.885368504	1	0.011999042	1.000003733	0.440472881	0	1.105574442	1	0	0.640866398	1	0	3.217432252	1
ENSBTAG00000046574	FRMPD1	0.019825811	-1.26079894	0.009994062	0.033133029	-0.49053987	0.644060323	0.116228104	1.7367271	8.45E-11	0.006865694	-2.790662833	4.14E-09	0.005973891	-2.896231997	2.02E-06	0.027116173	-0.779910721	0.506565612	0.190014393	2.151917724	0.101828133	0.004384387	-3.182210494	3.94E-05	0.005079289	-3.125588266	1.50E-08	0.065000962	0.583862523	0.960662177	0.005737082	-2.825730827	0.001618208	0.334773261	3.396836637	3.96E-26	0.059863098	0.710089741	1	0.021629466	-0.494954683	1	0	0.493285744	1
ENSBTAG00000017549	KITLG	0.027315561	-1.206974266	0.010126027	0.021084655	-1.619611834	4.92E-05	0.03200484	-0.972725002	0.025730232	0.041194165	-0.581191824	0.516650466	0.071089298	0.290743759	1	0.043290732	-0.49615856	1	0.147788972	1.381606144	0.301102892	0.064888934	0.147169905	1	0.200914114	2.15625262	1.99E-15	0.089854272	0.639004078	0.954409037	0.100398932	0.82140802	0.394713866	0.025197987	-1.215933666	0.209850796	0.074828872	0.569521542	1	0.054073666	0.104813498	1	0.067875036	1.091323483	0.724684135
ENSBTAG00000000526	TOPBP1	0.329989602	-1.00013895	0.010223361	0.830208275	0.49940974	0.246414265	0.408061715	-0.674292824	0.068097596	0.797707833	0.419261699	0.506554851	0.583649114	-0.09775964	1	0.833941243	0.487650728	0.648120475	1.069710656	0.791255433	0.47543426	0.321814037	-0.989838202	0.164503223	0.638861732	0.045085954	1	0.892807336	0.541519321	0.954409037	0.778330767	0.347052532	1	0.325174028	-0.961428937	0.246663318	0.838083368	0.437883001	1	0.475848258	-0.369331974	1	0.746625395	0.296308455	0.724684135
ENSBTAG00000031346	ANKUB1	0.000881147	-2.461250749	0.010419319	0.001882558	-1.685541514	0.058479746	0.005895628	-0.064132111	1	0.000429106	-3.101251359	0.001588566	0.001792167	-1.54490611	0.4797191	0	-3.9446296	0.001379915	0.01407514	1.699227683	0.610482246	0.000876877	-1.97159524	0.251616914	0.001693096	-1.635060567	0.084178038	0.001911793	-0.79968469	1	0.001912361	-1.242458654	0.975135266	0.105591566	5.75327114	2.51E-47	0	1.173745945	1	0.010814733	1.720719706	1	0	3.285603755	1
ENSBTAG00000019928	AQP11	0.027315561	1.100252779	0.010443845	0.009036281	-0.726183498	0.429401528	0.013054606	-0.143859303	1	0.012444071	-0.217630543	1	0.017921672	0.368151506	1	0.009514447	-0.614924154	1	0.01407514	0.516222854	0.937390971	0.01753755	0.3464284	0.924997374	0.009594213	-0.57969533	0.542798872	0.005735379	-0.965694641	0.994129097	0.011474164	-0.256940031	1	0.031197508	1.219356637	0.058204353	0.014965774	1.009001183	1	0.010814733	0.544293138	1	0	2.115678754	1
ENSBTAG00000011112	KCNK5	0.006608604	-1.55010414	0.010524658	0.032003494	0.942054047	0.026144377	0.018950234	0.030118215	1	0.032612047	0.953231578	0.041675018	0.017324283	-0.094191708	1	0.020931782	0.193080777	1	0.02111271	0.561186742	0.839143873	0.012276285	-0.560981992	0.833282532	0.007336751	-1.351785904	0.037582016	0.034412274	0.968692563	0.951640972	0.008605623	-1.034187341	0.914205402	0.005999521	-1.44330822	0.240747442	0.044897323	1.644126478	1	0.010814733	0.171381115	1	0	1.743945039	1
ENSBTAG00000033727	RBPMS	0.082387257	-1.038139384	0.011029561	0.080950013	-1.083812163	0.002507315	0.083802148	-1.016973937	0.004918703	0.151903482	-0.077230595	1	0.195943612	0.331823765	1	0.08991152	-0.896817587	0.107243485	0.126676262	-0.267402801	1	0.242895063	0.658885165	0.245867418	0.518087518	2.077875172	1.06E-16	0.191179301	0.280422618	1	0.175937176	0.155928024	1	0.051595879	-1.641445959	0.019152115	0.194555067	0.372577751	1	0.108147331	-0.441483661	1	0.135750072	0.256806491	0.724684135
ENSBTAG00000019806	YPEL2	0.039651621	1.000001305	0.011106164	0.016190003	-0.497455215	0.701737155	0.019371351	-0.204929749	0.934816094	0.023171718	0.083464049	1	0.023298173	0.099695466	1	0.011893058	-0.937451998	0.367153028	0.02111271	0.320488667	1	0.049982017	1.301423254	0.008455827	0.006772386	-1.709244569	0.00319909	0.028676895	0.459835232	1	0.017211245	-0.321181646	1	0.023998083	0.174444216	1	0.014965774	0.396623224	1	0.021629466	0.520276257	1	0	1.505090445	1
ENSBTAG00000006555	ZMYM1	0.297387158	-0.992755507	0.011149219	0.97177667	0.987762133	0.000168718	0.426590833	-0.432038498	0.355589559	0.823883292	0.663930516	0.069483431	0.347083045	-0.73291381	0.46669597	0.622244807	0.180645972	1	0.865621123	0.643022	0.557462806	0.219219371	-1.3961343	0.017526985	0.505671477	-0.152934401	0.974443014	0.648097831	0.226072191	1	0.570839641	0.037875281	1	0.311975082	-0.861835043	0.338450006	0.478904782	-0.196306492	1	0.313627261	-0.798927201	1	0.271500144	-0.81072884	0.750589769
ENSBTAG00000007665	NPR3	0.064764314	0.985452997	0.011207482	0.023720236	-0.688569207	0.366485543	0.052218424	0.608703146	0.15720389	0.018022447	-1.092221659	0.064262614	0.026285119	-0.489540873	1	0.049950845	0.523168045	0.873339378	0.126676262	1.881419045	0.193624962	0.012276285	-1.542150317	0.08904333	0.045713605	0.369891647	0.569578225	0.043971239	0.32691288	1	0.012430344	-1.511393661	0.295783158	0.015598754	-1.167247134	0.323450668	0.119726195	1.865325357	1	0.032444199	0.220290715	1	0	0.79065142	1
ENSBTAG00000004750	VSTM2L	0.002643441	-2.063008492	0.011251403	0.003388605	-1.788467777	0.01566872	0.002947814	-1.937855842	0.006471612	0.004291059	-1.42722569	0.118501723	0.00657128	-0.76217956	1	0.003805779	-1.561975274	0.184518686	0.02815028	1.59874629	0.474049516	0.009645652	-0.165217423	1	0.072238782	3.740441074	3.45E-26	0.021029723	1.006693128	0.954409037	0.006693262	-0.644876667	1	0.003599712	-1.32732435	0.492608137	0.029931549	1.931545043	1	0.043258933	2.216977981	1	0	2.445384199	1
ENSBTAG00000043994	GRK6	0.075778654	-1.058600479	0.011254566	0.28539586	1.173374203	5.10E-06	0.049691726	-1.701581712	1.40E-06	0.255317999	0.932437346	0.002145919	0.092595305	-0.727580899	0.569311178	0.117979138	-0.366379922	1	0.232239813	0.681254249	0.576527525	0.078918974	-0.942825002	0.257376468	0.17382457	0.253198025	0.657876086	0.246621298	0.764318192	0.951640972	0.134821423	-0.141399392	1	0.065994729	-1.185013252	0.14748734	0.239452391	0.755461248	1	0.151406264	0.109157044	1	0	-1.228314821	1
ENSBTAG00000000638	CDT1	0.001762294	-2.060334358	0.011350343	0.005271164	-0.638720657	0.71066188	0.001684465	-2.134521439	0.003249949	0.005149271	-0.648121694	0.803365633	0.011947781	0.657750094	1	0.019504616	1.531519414	0.002238037	0.02815028	2.100144074	0.317424971	0.002630632	-1.30520514	0.400941098	0.013544772	0.861569669	0.174044401	0.005735379	-0.13329459	1	0.023904508	1.748473465	0.012359689	0.001199904	-1.847158039	0.225878512	0	0.824161507	1	0.021629466	1.962794493	1	0	2.936019317	1
ENSBTAG00000009956	CENPM	0.543667782	-0.948960138	0.011397028	1.515083037	0.744218433	0.013169848	0.62030434	-0.748203126	0.033992433	1.413474772	0.603070095	0.121544809	0.959406833	-0.048858627	1	1.263994229	0.403500642	0.956659388	0.577080748	-0.775176443	1	0.380564828	-1.432097657	0.012424505	1.061571483	0.1120901	0.940116935	0.923396024	-0.102349632	1	1.216261346	0.316670548	1	0.311975082	-1.706094175	0.008074411	0.748288721	-0.397309849	1	0.778660786	-0.342928528	1	1.15387561	0.209516105	0.724684135
ENSBTAG00000000576	ADGRG2	0.007930324	-1.578354832	0.01152294	0.009789304	-1.303793333	0.027239591	0.009264559	-1.363068563	0.014714037	0.024459035	0.129388533	1	0.023895562	0.098513935	1	0.012368781	-0.918540371	0.584091912	0.119638692	2.500682003	0.096942509	0.02806008	0.353535287	0.891302004	0.062644569	1.742429438	1.48E-06	0.053530204	1.324853778	0.951640972	0.03155395	0.532567541	1	0.023998083	0.135876559	1	0.089794647	2.183753118	1	0	-1.108255259	1	0	1.468310596	1
ENSBTAG00000012263	ASAP3	0.007049177	1.842703912	0.01152294	0.000753023	-1.405433595	0.436211712	0.000842233	-1.219410336	0.384061999	0.002574635	0.156764972	1	0.001792167	-0.211005373	1	0.001902889	-0.223094046	1	0.00703757	2.40114633	0.683251644	0.007891897	1.900529937	0.075709385	0.003950558	0.824371051	0.592227757	0	-0.529595526	1	0	-1.569109159	1	0	-1.224962632	0.719212143	0	2.455516914	1	0	1.990808869	1	0	4.567374724	1
ENSBTAG00000031252	CD82	3.104281358	0.792576324	0.01152294	2.655913455	0.534387073	0.171274492	3.310816512	0.916187015	0.000540144	1.063753479	-0.961513769	0.009782535	0.722840765	-1.514911783	0.000403057	2.037994459	0.073018099	1	3.42729664	0.816104996	0.453380657	0.538402776	-1.919258492	0.000313335	0.290083861	-2.866338952	1.35E-13	2.37444692	0.292875631	1	0.444623841	-2.19299942	0.000330126	4.163667444	1.171609168	0.00555243	2.948257561	0.586278493	1	1.470803707	-0.412137579	1	1.900501005	-0.079833128	0.724684135
ENSBTAG00000009987	ITGB3	0.321618704	-1.000224817	0.01152294	0.269205858	-1.292349699	8.59E-05	0.151601875	-2.140891192	1.25E-10	0.738491221	0.331536411	0.748680823	0.780787504	0.40785522	1	0.330151297	-0.952842497	0.054772264	2.688351779	2.181964664	0.050224501	1.257442313	1.156543915	0.003130872	1.516450066	1.566126247	1.75E-09	0.854571476	0.514384275	0.956301276	0.78789257	0.405704091	1	0.12119032	-2.360271021	0.000249475	0.957809563	0.665487174	1	0.573180856	-0.06808482	1	0.543000287	-0.082128029	0.724684135
ENSBTAG00000006326	ALDH1L2	1.687396764	0.795091062	0.011537371	0.566650092	-1.004442809	0.002441738	0.557558008	-1.017098577	0.001875658	1.604855995	0.709591114	0.038011547	1.596223573	0.666270064	0.264456629	0.546129234	-1.036918574	0.014296483	0.935996824	-0.176692802	1	3.159389577	1.773416182	2.36E-08	0.432303964	-1.374501926	0.000315628	0.896630922	-0.243995804	1	0.489564315	-1.154053279	0.23036206	0.362371057	-1.584905863	0.015810501	0.972775337	-0.120344736	1	0.562366123	-0.902460671	1	0.814500431	-0.356246303	0.724684135
ENSBTAG00000012312	ROR1	0.014098354	-1.401998671	0.011564747	0.016190003	-1.222316322	0.016925903	0.011370141	-1.724382739	0.000336416	0.034757576	-0.017930707	1	0.043609402	0.347396301	1	0.019028893	-0.94576424	0.371164656	0.204089533	2.614271213	0.050994045	0.042966997	0.322453822	0.866897443	0.119081118	2.150636219	2.89E-12	0.074559927	1.149608348	0.951640972	0.042071933	0.291388531	1	0.004799617	-2.622926618	0.008639386	0.029931549	0.316299975	1	0.010814733	-0.735509481	1	0	0.838920629	1
ENSBTAG00000010647	NTRK2	0.002643441	-1.94474561	0.011640414	0.001129535	-3.033897734	2.94E-05	0.002105582	-2.248556682	0.000952135	0.003003741	-1.788093474	0.019939381	0.004779112	-1.07816969	0.735020382	0.003330056	-1.619789909	0.115122922	0.01407514	0.964629103	0.803090926	0.00350751	-1.358204331	0.358914244	0.081832996	4.566736633	5.81E-45	0.01911793	0.99493112	0.954409037	0.003824721	-1.225807414	0.910227178	0	-3.23201739	0.028962802	0.029931549	2.047568839	1	0.010814733	0.990808869	1	0	2.560319966	1
ENSBTAG00000012141	RAD9A	0.094723317	-1.054510898	0.011640414	0.219506315	0.290086389	0.780539448	0.109490243	-0.835949264	0.033221831	0.176791623	-0.0742184	1	0.185787998	0.007859126	1	0.318733961	0.918945466	0.008427744	0.323728225	0.833890884	0.478415628	0.086810871	-1.128796734	0.120880467	0.226874926	0.328336636	0.507388727	0.219856196	0.263986112	1	0.289722632	0.696160251	0.509139189	0.088792908	-1.077770967	0.2107399	0.164623519	-0.067224863	1	0.216294663	0.279118601	1	0.407250215	1.264975794	0.724684135
ENSBTAG00000012848	PTPRU	0.009692618	-1.483697659	0.011814479	0.011295351	-1.288768681	0.01749327	0.004211163	-2.658009336	9.92E-07	0.024888141	-0.054170934	1	0.037635511	0.612405895	0.827799922	0.009514447	-1.495961322	0.032864388	0.140751402	2.539474486	0.07347619	0.042966997	0.807420533	0.311202506	0.082961727	2.042044924	4.25E-10	0.049706618	1.018134068	0.951640972	0.036334852	0.546368058	1	0.010799137	-1.161346533	0.373142621	0.044897323	1.179575024	1	0.010814733	-0.2909621	1	0	1.282698024	1
ENSBTAG00000018069	TNFSF15	0.074456933	0.895171332	0.011885184	0.039157216	-0.192822194	1	0.01600242	-1.558896803	0.000133019	0.075093529	0.914832364	0.009020413	0.044206791	0.014061182	1	0.031397674	-0.527970444	1	0.035187851	-0.08256198	1	0.131531623	1.770532152	1.11E-06	0.00620802	-2.833407515	5.25E-08	0.047794825	0.165549892	1	0.007649442	-2.434117948	0.004691077	0.017998562	-1.247765582	0.187039146	0.014965774	-0.591446565	1	0.010814733	-1.05615461	1	0.067875036	1.520411245	0.724684135
ENSBTAG00000011880	CHAF1B	0.09384217	-1.028197399	0.011908755	0.156628863	-0.232115512	0.978139704	0.048849493	-2.016265799	5.68E-09	0.189235694	0.080825418	1	0.252098184	0.541007279	0.574368596	0.333005631	1.04498483	0.000823952	0.253352524	0.523136854	0.642437124	0.13591601	-0.423598395	0.850968152	0.264687414	0.625530405	0.078128291	0.168237785	-0.090520566	1	0.305021517	0.819301838	0.252683461	0.037197029	-2.285976373	0.00077	0.179589293	0.086914987	1	0.162220997	-0.076968178	1	0.135750072	0.079088242	0.724684135
ENSBTAG00000016399	AKAP4	0.039211048	0.996998817	0.011908755	0.015813491	-0.519277105	0.687661583	0.034952655	0.797512967	0.042708747	0.013302282	-0.769761651	0.342704704	0.015532116	-0.50051199	1	0.022358949	0.043782426	1	0.00703757	-0.672673903	1	0.025429447	0.259424358	0.952849482	0.010158579	-1.126481299	0.065673667	0.021029723	0.044797733	1	0.004780902	-2.01562489	0.089642067	0.035997125	0.786949176	0.313517812	0.074828872	2.009001183	1	0.032444199	0.952427777	1	0.067875036	2.522123642	0.724684135
ENSBTAG00000017592	GPAT3	0.011014339	-1.459430313	0.012029311	0.010918839	-1.502218657	0.003703679	0.03200484	0.179278092	0.900666469	0.012014965	-1.336929471	0.026797861	0.020311228	-0.516350584	1	0.016174559	-0.880741001	0.557201737	0.049262991	0.952245379	0.572997911	0.038582609	0.471250515	0.711597237	0.033861929	0.269096171	0.757039819	0.028676895	0.071367453	1	0.012430344	-1.166144492	0.756829338	0.217182653	3.416098539	1.36E-20	0.029931549	0.606996248	1	0.021629466	0.142288203	1	0.135750072	2.718854058	0.724684135
ENSBTAG00000035998	CKB	0.84590125	-0.957284574	0.012164374	0.520715666	-1.718364716	2.48E-08	0.580719406	-1.536722624	1.42E-06	1.077055761	-0.582902306	0.287585475	1.199557236	-0.398614861	1	0.636040754	-1.384238952	0.000323885	2.505374957	0.695654688	0.520618202	2.003665052	0.399324198	0.680800797	7.472199058	2.990685195	2.64E-42	0.898542715	-0.801053695	0.981110943	1.264070361	-0.307523713	1	1.1819056	-0.404704322	0.786239992	0.493870556	-1.629643845	1	2.227835027	0.520177635	1	1.968376041	0.301445654	0.724684135
ENSBTAG00000008185	RTN2	1.909886416	0.7902662	0.012208188	1.203331358	0.004281437	1	2.152746631	1.015735587	7.76E-05	0.64280061	-0.991035776	0.007191542	0.589025615	-1.095406343	0.029333423	1.044686235	-0.223247726	1	1.731242245	0.529079277	0.609674555	0.635736176	-0.958644832	0.184426912	0.242112794	-2.420567485	2.17E-10	1.049574363	-0.198703159	1	0.312670959	-1.998243195	0.00161692	3.71010367	1.772104531	8.35E-07	1.122433082	-0.099293665	1	0.72458712	-0.724973057	1	1.086000574	-0.151633082	0.724684135
ENSBTAG00000025664	ENSBTAG00000025664	0.036567606	1.005378483	0.012246713	0.009789304	-1.136498587	0.038807622	0.00800121	-1.410766718	0.005035695	0.024888141	0.340201903	0.91250579	0.028674675	0.562402217	0.913070177	0.013320225	-0.640246934	0.982251717	0.01407514	0.022634707	1	0.076288341	2.177685451	1.28E-08	0.007901117	-1.371549159	0.020813866	0.021029723	0.154145129	1	0.005737082	-1.681785933	0.23036206	0.009599233	-0.967574789	0.471434246	0	-0.486767589	1	0.010814733	0.052209414	1	0	1.625090221	1
ENSBTAG00000011808	MSTN	0.012776633	-1.415599637	0.012265591	0.022967213	-0.548194414	0.66921033	0.073695356	1.4721071	3.08E-06	0.017164235	-0.981093939	0.158369658	0.011350392	-1.535335958	0.063816166	0.016174559	-1.055907127	0.246887257	0.070375701	1.251768706	0.423970701	0.013153162	-1.269872067	0.247540138	0.005643655	-2.509431144	3.00E-05	0.022941516	-0.40465798	1	0.019123606	-0.733185085	1	0.225581983	3.254817632	8.55E-19	0.059863098	1.18308381	1	0.021629466	-0.023266316	1	0	0.96367566	1
ENSBTAG00000017816	FXYD1	0.034805312	1.02157684	0.012437317	0.012048374	-0.732171568	0.344296509	0.021898049	0.225374506	0.860504928	0.017164235	-0.167507063	1	0.01911645	0.017471811	1	0.018077449	-0.080070502	1	0	-1.486378941	1	0.015783795	-0.24058484	1	0.003950558	-2.220023068	0.000332735	0.021029723	0.239952282	1	0.009561803	-0.929105295	0.934729155	0.055195591	1.662201559	0.00072409	0.029931549	1.1893428	1	0.021629466	0.724634756	1	0	1.708418605	1
ENSBTAG00000010118	HAT1	0.476260027	-0.941190074	0.012458353	1.044066914	0.32545249	0.687661583	0.391217062	-1.247998111	8.85E-05	1.055600467	0.336970766	0.71774488	1.136831385	0.443021058	0.883728955	1.317750852	0.708827335	0.095085928	0.633381309	-0.442705025	1	0.538402776	-0.713096627	0.445943126	0.982560314	0.208570692	0.758521688	0.460742116	-0.920409254	0.960297367	1.402716505	0.75451568	0.382443261	0.224382078	-1.984857063	0.00171776	0.463939007	-0.872762014	1	1.211250112	0.48985556	1	1.561125826	0.823354372	0.724684135
ENSBTAG00000001323	CENPC	0.478022321	-0.94280838	0.012504785	1.405518135	0.850575025	0.002293438	0.441329904	-1.070463356	0.000996672	1.49285936	0.937471314	0.001126851	0.587830837	-0.603624997	0.675580498	0.879134865	0.023187774	1	1.520115142	0.815297653	0.459052233	0.519111471	-0.774747974	0.376233593	1.036175036	0.286849131	0.60469493	0.531478457	-0.718801883	0.994129097	0.890203862	0.041021003	1	0.435565211	-1.022916824	0.1989974	0.463939007	-0.879610679	1	0.735401854	-0.232549594	1	0.543000287	-0.599841155	0.724684135
ENSBTAG00000015172	MCM6	0.462161672	-0.940873901	0.012644276	1.054985753	0.396270743	0.494218293	0.526816517	-0.741503292	0.036669291	0.811010115	-0.051469487	1	0.921771323	0.15353494	1	1.377691866	0.83947572	0.018160116	1.477889722	0.82542106	0.453160477	0.413886173	-1.059823684	0.114934561	0.962807522	0.224604754	0.73212414	0.546772801	-0.625953913	1	1.345345687	0.736298622	0.415255761	0.367170674	-1.222287985	0.089106505	0.50883633	-0.699513873	1	0.746216587	-0.161042673	1	0.814500431	-0.018494163	0.724684135
ENSBTAG00000010907	PPP1R1A	0.092520449	0.877702822	0.012644276	0.060994894	0.165686981	1	0.048007261	-0.226815991	0.872442007	0.047630753	-0.238602547	1	0.051972848	-0.089938739	1	0.048047955	-0.220383062	1	0.01407514	-1.414429099	0.999144422	0.045597629	-0.27557487	1	0.020317158	-1.503923445	0.001414764	0.061177376	0.184408919	1	0.049721376	-0.143177953	1	0.095992333	0.853622058	0.129966995	0.059863098	0.408211199	1	0.118962065	1.216150985	1	0.203625108	2.196772782	0.724684135
ENSBTAG00000011482	SLC43A2	0.135256085	0.853248061	0.012644276	0.071913733	-0.215939654	1	0.105700196	0.426769846	0.317957891	0.054067341	-0.661905263	0.312461873	0.072881466	-0.179383394	1	0.079921351	-0.038702498	1	0.182976823	1.211175386	0.33647195	0.084180239	0.049231668	1	0.032733198	-1.391974994	0.001983608	0.116619374	0.541478354	0.960297367	0.053546097	-0.624126637	1	0.095992333	0.250094312	0.854062371	0.179589293	1.226611185	1	0.108147331	0.519039484	1	0.067875036	0.627853124	0.727054534
ENSBTAG00000005186	DBNDD2	0.021588105	-1.196133575	0.012669866	0.018825584	-1.426068441	0.000568418	0.016423537	-1.609201884	0.000101222	0.028320988	-0.787875955	0.201469426	0.03166162	-0.588831793	1	0.024737561	-0.981901656	0.157408909	0.035187851	-0.167696505	1	0.044720752	-0.049740205	1	0.24267716	3.174259823	9.00E-38	0.053530204	0.240922627	1	0.036334852	-0.354432993	1	0.016798658	-1.428644903	0.116271315	0.014965774	-0.676188766	1	0.183850463	2.055082083	1	0.067875036	1.435669044	0.724684135
ENSBTAG00000000128	FGF18	0.015860648	-1.291884947	0.012669866	0.017696049	-1.152667524	0.016798983	0.008843443	-2.148083889	2.63E-06	0.040335953	0.156090185	1	0.035843344	-0.028460885	1	0.016650282	-1.208525573	0.064930858	0.077413271	1.191173168	0.421075654	0.029813834	-0.289966674	1	0.148992489	2.549016374	4.71E-20	0.074559927	1.085379543	0.951640972	0.049721376	0.480297456	1	0.004799617	-2.683879829	0.004251761	0.014965774	-0.331489363	1	0.064888399	1.021440488	1	0	0.778320618	1
ENSBTAG00000020173	INPP5D	0.017622943	1.323212855	0.012755872	0.009789304	0.302385654	1	0.015581304	1.10406821	0.037676028	0.001287318	-2.462517602	0.004971332	0.004779112	-0.713505714	1	0.007611557	-0.082879538	1	0	-0.285914358	1	0.005261265	-0.497850218	0.967228163	0.001128731	-2.444117785	0.010360255	0.013382551	0.876043275	0.971074806	0.001912361	-1.624604272	0.711700851	0.01439885	0.928733908	0.425636221	0.014965774	1.806014161	1	0	0.332317333	1	0	2.908883187	1
ENSBTAG00000039992	TUBA1C	0.88423115	-0.935654874	0.012755872	2.517357153	0.799832012	0.005203095	0.99804568	-0.751522252	0.03262295	2.701221521	0.906234794	0.001820832	1.645209477	0.048576982	1	1.324410965	-0.298620336	1	1.126011216	-0.506819166	1	0.818126693	-1.007145025	0.102974533	1.807098292	0.199390009	0.7730559	0.846924304	-0.931914362	0.960297367	2.051006751	0.386064583	1	0.437965019	-1.909752761	0.002507215	0.972775337	-0.714931847	1	1.51406264	-0.080907795	1	1.357500718	-0.257291408	0.724684135
ENSBTAG00000008399	ATRIP	0.117633143	-1.002491872	0.012899355	0.244732598	0.16427786	0.990763984	0.170973226	-0.422399167	0.435172296	0.20210887	-0.152994395	1	0.192956667	-0.218776739	1	0.350131634	0.76359805	0.049917029	0.253352524	0.219656923	0.818466569	0.100840911	-1.178477473	0.076406319	0.345391679	0.721771952	0.027938449	0.23515054	0.092454511	1	0.326057483	0.595243433	0.69863261	0.136789075	-0.714775354	0.505038143	0.26938394	0.33489517	1	0.183850463	-0.208157704	1	0.135750072	-0.221679382	0.738241556
ENSBTAG00000011042	TMEM129	0.087233566	-1.040139237	0.013248956	0.174324912	0.053411192	1	0.104015731	-0.77317043	0.054335911	0.178937152	0.095866249	1	0.160100269	-0.082057516	1	0.234055386	0.541382618	0.480327017	0.626343739	1.924447823	0.105216354	0.100840911	-0.771477293	0.43609745	0.253400104	0.661392866	0.062828146	0.252356677	0.605655214	0.954409037	0.21992147	0.409135455	1	0.094792429	-0.847617423	0.399343138	0.299315488	0.876403489	1	0.183850463	0.18795113	1	0.203625108	0.588299845	0.724684135
ENSBTAG00000018167	KLHL31	0.009692618	-1.477610329	0.013332112	0.012048374	-1.186160515	0.041927314	0.02863591	0.180769204	0.891316442	0.007723906	-1.808654796	0.001634526	0.007766058	-1.731577287	0.039227611	0.016174559	-0.709773213	0.931616387	0.049262991	1.114265182	0.518392042	0.006138142	-1.959818072	0.043733243	0.01128731	-1.21566361	0.065619758	0.003823586	-2.21765152	0.951640972	0.021992147	-0.194364366	1	0.292776616	4.412557095	3.50E-39	0.029931549	0.76746092	1	0.021629466	0.302752875	1	0	1.288515351	1
ENSBTAG00000053974	ENSBTAG00000053974	0.001321721	-2.558419408	0.013341848	0.003012094	-1.606640686	0.124621685	0.0206347	1.454193197	0.005896138	0.000429106	-3.618168472	0.000776406	0.000597389	-3.085474491	0.041531284	0.001902889	-2.103133422	0.118592386	0.105563552	3.705152517	0.030744788	0	-3.496686285	0.053932907	0.001128731	-2.582445941	0.016913638	0.003823586	-0.723418796	1	0.00095618	-2.356115436	0.547077887	0.107991375	4.512313854	6.52E-20	0	0.660336705	1	0	0.195628661	1	0	2.772194515	1
ENSBTAG00000017407	HSF2BP	0.737520152	0.790136742	0.013360871	0.467251006	0.013639551	1	0.440066555	-0.084921122	1	0.447557434	-0.057126852	1	0.502404201	0.128376194	1	0.485712498	0.076378444	1	0.175939253	-1.358173419	1	0.530510878	0.208819592	0.90545091	0.121902945	-2.02661117	1.19E-07	0.548684594	0.252734463	1	0.403508088	-0.209202068	1	0.395968374	-0.234587733	1	0.568699428	0.311861163	1	0.389330393	-0.229123993	1	0.135750072	-1.282617997	0.85752929
ENSBTAG00000001727	PRXL2B	5.906329248	0.778164323	0.013360871	3.744408748	0.003159032	1	5.423135976	0.632876648	0.036821079	2.839393615	-0.444016095	0.559743241	2.824455485	-0.4378146	1	3.721575783	-0.006979558	1	1.829768227	-1.040121404	1	3.00505914	-0.33301064	0.87700421	1.304813008	-1.611292864	7.65E-06	2.802688554	-0.426787679	1	2.149493322	-0.833601887	0.56783592	6.533478164	0.855013908	0.082722678	2.394523908	-0.656204843	1	3.947377596	0.068042979	1	3.80100201	-0.044486278	0.724684135
ENSBTAG00000001822	SNX10	0.033483591	-1.129460141	0.013398739	0.03576861	-1.049289784	0.012645339	0.026530328	-1.485431927	0.000141296	0.062649459	-0.156281202	1	0.083634469	0.308937336	1	0.038533509	-0.907841757	0.180695093	0.084450841	0.392295412	0.791644838	0.099964033	0.580395124	0.425582713	0.239290967	2.207766779	2.78E-17	0.074559927	0.14170315	1	0.076494424	0.16704178	1	0.04319655	-0.669513412	0.645776521	0.089794647	0.575547617	1	0.054073666	-0.112650373	1	0.135750072	1.460627911	0.724684135
ENSBTAG00000054085	SELENOP	0.491680102	0.796529518	0.013398739	0.24736818	-0.360256211	0.743271594	0.221086068	-0.53336803	0.238211055	0.327407787	0.101844791	1	0.326771817	0.095321149	1	0.241191221	-0.389227468	1	0.225202243	-0.42062572	1	0.506835186	0.780105192	0.101658885	0.239855332	-0.390878646	0.568379335	0.311622261	0.023129496	1	0.231395633	-0.428995645	1	0.303575753	-0.018151897	1	0.434007458	0.524068683	1	0.248738862	-0.264049931	1	0.271500144	0.044797038	0.724684135
ENSBTAG00000023429	PLS1	0.180635163	0.811796518	0.013496843	0.123119322	0.158498513	1	0.127598245	0.215914177	0.733614452	0.090541341	-0.343705735	0.89324674	0.100361362	-0.169875497	1	0.139862365	0.364732754	1	0.197051963	0.859272652	0.479073569	0.096456523	-0.221218018	1	0.031604467	-1.90775444	5.12E-06	0.049706618	-1.147359734	0.954409037	0.106136014	-0.075170832	1	0.094792429	-0.239037817	1	0.044897323	-0.932753676	1	0.108147331	0.066705595	1	0.135750072	0.763391374	0.724684135
ENSBTAG00000043985	DACH1	0.041413915	-1.07309731	0.013496843	0.032756517	-1.450557515	6.54E-05	0.017686885	-2.340827066	7.94E-10	0.094403294	0.230422014	0.96046661	0.106932642	0.423903519	0.986229942	0.044717899	-0.948054687	0.106191956	0.091488411	0.247804213	0.864075578	0.1324085	0.748187905	0.177437162	0.291212592	2.256163989	1.32E-19	0.043971239	-0.867465165	0.971074806	0.122391079	0.620687989	0.71615064	0.019198467	-2.066845237	0.005057529	0.074828872	0.100957814	1	0.010814733	-1.952395426	1	0	-0.376748778	1
ENSBTAG00000025221	TEX30	0.397837932	-0.935880825	0.013496843	0.85807014	0.303018554	0.737729196	0.261092119	-1.583417859	9.78E-07	1.124257408	0.764883887	0.019035287	0.842318577	0.254317418	1	0.859630249	0.295078029	1	0.527817758	-0.438282913	1	0.603291709	-0.265390056	1	1.025452091	0.578487742	0.117521421	0.627068108	-0.199346199	1	0.864386994	0.28461926	1	0.12958965	-2.512060743	6.91E-05	0.6435283	-0.147229911	1	0.659698722	-0.115266898	1	0.678750359	-0.038860575	0.724684135
ENSBTAG00000016801	RXRG	0.039651621	1.025996514	0.013546651	0.035392099	0.845441203	0.058268733	0.015581304	-0.522936061	0.510242498	0.022313506	0.045621645	1	0.020311228	-0.089216893	1	0.014747392	-0.594059634	1	0.02815028	0.666490896	0.753944849	0.02104506	-0.014581165	1	0.002257462	-3.094708953	4.31E-06	0.013382551	-0.547168156	1	0.015298885	-0.467432459	1	0.027597796	0.399430014	0.808618085	0.014965774	0.417135822	1	0.010814733	-0.047572223	1	0.067875036	2.528993632	0.724684135
ENSBTAG00000030632	ALG10	0.109702818	-1.005338793	0.013575353	0.303468421	0.66006057	0.047386229	0.100225684	-1.148719158	0.000996672	0.280635246	0.50792682	0.276107039	0.195943612	-0.088660129	1	0.288763454	0.548410412	0.418131543	0.358916075	0.8147049	0.484300825	0.121009093	-0.808363133	0.369797432	0.227439292	0.147598286	0.836454649	0.15867882	-0.383715999	1	0.275379927	0.437857314	1	0.093592525	-1.169481562	0.133441987	0.164623519	-0.23253908	1	0.194665197	-0.031719273	1	0.135750072	-0.123969674	0.730492492
ENSBTAG00000005678	AACS	0.264784714	-0.978900735	0.013788035	0.580204513	0.281578978	0.811084381	0.400902737	-0.331392209	0.566656642	0.479311269	-0.041511127	1	0.397263726	-0.333132499	1	0.621293362	0.385583096	1	0.985259814	1.01353349	0.369162363	0.224480636	-1.176216354	0.069189245	0.735932596	0.657251644	0.062651652	0.674862933	0.473123975	0.960297367	0.614823935	0.344120641	1	0.479961665	-0.034844845	1	0.613596751	0.333835881	1	0.34607146	-0.480187657	1	0.746625395	0.633703352	0.724684135
ENSBTAG00000031287	TMEM158	1.369302648	-0.926901992	0.013788065	1.593397468	-0.704245093	0.072811124	0.690209649	-1.97159839	3.56E-10	3.563295236	0.630219062	0.09058665	3.246212163	0.447364072	0.872853381	1.655037984	-0.626907908	0.433153709	2.892441312	0.231345838	0.780647499	3.302320607	0.458372535	0.569477462	5.33946188	1.304998826	1.08E-06	3.73946713	0.626014542	0.954409037	4.024562897	0.766117002	0.353933145	0.423566169	-2.58689329	3.29E-05	3.187709952	0.363101661	1	1.784430968	-0.469520998	1	1.764750933	-0.517404722	0.724684135
ENSBTAG00000012216	MLKL	0.000440574	-2.68533152	0.013901157	0.00225907	-1.060184426	0.471563711	0.002947814	-0.665396424	0.586581485	0.002574635	-0.843235028	0.76059013	0.003584334	-0.310541047	1	0.005232946	0.185138275	1	0	0.460040019	1	0.00701502	0.681412648	0.837715275	0.018059696	2.328196789	6.05E-07	0.009558965	1.219997676	0.954409037	0.010517983	1.278887747	0.607307919	0.002399808	-0.522163641	0.910654156	0	1.542979755	1	0	1.07827171	1	0	3.654837565	1
ENSBTAG00000009292	TMEM100	0.057715137	-1.036144549	0.014004901	0.116718624	0.075361784	1	0.080854334	-0.517558811	0.300856938	0.165205764	0.664708863	0.08163152	0.149347265	0.468983735	0.846834004	0.098950245	-0.191466778	1	0.098525981	-0.095230797	1	0.099087156	-0.174186089	1	0.104971981	-0.094115374	1	0.15867882	0.535851851	0.960297367	0.175937176	0.708401648	0.493409564	0.07199425	-0.637215005	0.627348224	0.089794647	-0.117270873	1	0.075703132	-0.388654445	1	0	-0.81683765	1
ENSBTAG00000020869	DDC	0.004846309	-1.617976252	0.014333659	0.004894652	-1.645146926	0.004962987	0.002947814	-2.29818745	0.00010202	0.024888141	0.910125005	0.080406463	0.028674675	1.112150025	0.08177577	0.003805779	-1.923796096	0.010469574	0.035187851	1.511023948	0.430800761	0.027183202	0.993639342	0.20060268	0.032733198	1.352664528	0.000769129	0.017206137	0.366725828	1	0.027729229	1.021522091	0.435549906	0.003599712	-1.681820307	0.172688736	0.014965774	0.988390903	1	0.010814733	0.523682858	1	0	2.095141823	1
ENSBTAG00000015874	CASP3	0.177110574	-0.980721806	0.014333659	0.353544476	0.119287744	1	0.21055816	-0.716601431	0.064871386	0.317109246	-0.061983621	1	0.348875212	0.091783478	1	0.494751223	0.679347242	0.143324002	0.408179066	0.325642706	0.750043464	0.255171348	-0.386150636	0.887297792	0.359500816	0.140247521	0.845205477	0.39382936	0.269073668	1	0.590919428	0.911290326	0.113905201	0.245980353	-0.433517564	0.850461393	0.284349714	-0.161154447	1	0.324441994	0.008944665	1	0.407250215	0.433135373	0.724684135
ENSBTAG00000002174	RERG	0.000440574	-2.700438413	0.014475551	0	-3.975599093	0.000367084	0.001263349	-1.744251845	0.059465581	0.000858212	-2.143629961	0.046034193	0	-3.225955715	0.047706507	0.000475722	-2.57539579	0.051916664	0.01407514	2.060109412	0.520942683	0	-2.628993577	0.132079521	0.04627797	5.751951506	6.99E-45	0.005735379	0.588240964	1	0.00095618	-1.481646318	0.926294955	0.001199904	-1.137499791	0.65136182	0	1.528029413	1	0	1.063321369	1	0	3.639887223	1
ENSBTAG00000047524	TMEM200B	0.009252045	-1.535627543	0.014563923	0.013554421	-0.9991229	0.153388192	0.006737861	-1.997017915	0.000309722	0.012444071	-1.106714641	0.137444324	0.030466842	0.289762	1	0.025689006	0.016139365	1	0.077413271	1.720071937	0.293544998	0.007891897	-1.623032019	0.142258627	0.111180001	2.708588146	3.07E-17	0.03823586	0.652504189	0.968848376	0.033466311	0.437190829	1	0.005999521	-1.895352751	0.118297926	0.044897323	1.194251601	1	0.043258933	1.054424968	1	0	1.29728556	1
ENSBTAG00000022058	ACACB	0.538821473	-0.924850002	0.014710629	0.712736628	-0.497769414	0.371359185	0.493548328	-1.064718998	0.001042395	0.64794988	-0.639877794	0.187752753	1.550224616	0.769490992	0.103093403	2.003742451	1.259544964	6.29E-06	0.900808973	-0.099774273	0.988083801	0.546294673	-0.860022477	0.274179951	1.082453006	0.182826775	0.806650699	1.001779538	0.054639748	1	1.941046016	1.094023001	0.024420408	0.451163965	-1.130386802	0.130242793	0.957809563	-0.010743063	1	1.081473314	0.163230497	1	0.950250503	-0.018294807	0.724684135
ENSBTAG00000012607	NCAPH2	0.386823592	-0.960552013	0.014846955	0.998885511	0.591928511	0.099498881	0.360896687	-1.07202102	0.001514253	1.116962608	0.774810161	0.016778711	0.660114913	-0.113541317	1	0.790650511	0.176783239	1	1.35825103	0.943933868	0.395870728	0.391964236	-0.894924451	0.245391335	0.822844881	0.23758188	0.705834297	0.720745965	0.024163348	1	0.842394847	0.263498242	1	0.305975561	-1.24678634	0.082166021	0.823117593	0.219442407	1	0.821919719	0.216419438	1	0.610875323	-0.159050489	0.724684135
ENSBTAG00000016223	SCRN1	0.040092195	1.024381752	0.014867375	0.028238377	0.42103015	0.712469378	0.015581304	-0.541648322	0.49200198	0.026175459	0.287664817	0.977966326	0.025090341	0.2190213	1	0.013795948	-0.712899314	0.916209571	0.049262991	1.337643388	0.431343966	0.02104506	-0.032682972	1	0.009029848	-1.304691522	0.035882407	0.021029723	0.034305359	1	0.008605623	-1.275195441	0.611564567	0.022798179	0.104054888	1	0.014965774	0.400021801	1	0.021629466	0.523682858	1	0	1.508481034	1
ENSBTAG00000021723	EME1	0.059918005	-1.051554975	0.015086408	0.154369793	0.475209486	0.344342006	0.050533958	-1.315876807	0.000350282	0.145037788	0.358422476	0.685441021	0.129036037	0.157512991	1	0.1469982	0.375798032	1	0.309653085	1.440799377	0.242028236	0.065765811	-0.856632371	0.366101564	0.171567108	0.622830674	0.098694175	0.124266546	0.105074894	1	0.155857389	0.445453135	1	0.033597317	-1.801119235	0.014480939	0.194555067	0.818953216	1	0.108147331	0.004373596	1	0.067875036	0.115678754	0.76822736
ENSBTAG00000006419	TNNT1	0.03084015	-1.588695737	0.015275814	0.01995512	-2.259234663	3.81E-05	0.050112842	-0.860201225	0.23150408	0.026175459	-1.835717599	0.003357592	0.022103395	-2.030960332	0.021658375	0.027591895	-1.741693649	0.021318812	0.225202243	1.432078189	0.347901649	0.035075099	-1.321682944	0.376995875	0.025396447	-1.838293806	0.006598999	0.053530204	-0.66007646	1	0.019123606	-2.17236493	0.16547714	1.28269755	5.335932109	1.56E-51	0	-2.557682584	1	0.064888399	-0.209770391	1	0.543000287	2.731124928	0.724684135
ENSBTAG00000020755	SELP	0.011014339	6.584963806	0.015310317	0	-2.130573753	1	0	-1.944550495	1	0	-1.913624356	1	0	-1.380930375	1	0	-1.745320791	1	0	2.290115018	1	0	-0.783968237	1	0.000564365	-0.416637048	0.8244375	0	0.387942313	1	0	-0.65157132	1	0	-0.307424792	1	0	3.373054753	1	0	2.908346709	1	0	5.484912563	1
ENSBTAG00000054003	ENSBTAG00000054003	0.009692618	1.550105049	0.015410333	0.00225907	-0.777784695	0.775194077	0.001684465	-1.115662411	0.336729415	0.003861953	0.013444122	1	0.003584334	-0.028141316	1	0.003805779	0.009566711	1	0.00703757	1.741221772	0.815183761	0.002630632	-0.295867276	1	0.00620802	0.760240714	0.538321271	0.007647172	1.216830397	0.960297367	0	-2.218611912	0.617994693	0.005999521	0.80360652	0.856458187	0	1.806014161	1	0	1.341306116	1	0	3.917871971	1
ENSBTAG00000006563	KLHL40	0.056393417	-1.054804554	0.015410333	0.061747917	-0.933434223	0.023359877	0.264461049	1.576846877	1.89E-10	0.009869435	-3.598913915	7.92E-17	0.008960836	-3.656710009	7.39E-12	0.062795347	-0.882787792	0.163292293	0.218164673	1.025411791	0.41176986	0.00701502	-3.894642185	9.92E-09	0.009029848	-3.658711835	8.13E-14	0.087942479	-0.311710122	1	0.011474164	-3.228978628	8.87E-06	1.059515375	3.977977427	7.68E-47	0.179589293	0.795647445	1	0.064888399	-0.566271314	1	0.135750072	0.785158048	0.724684135
ENSBTAG00000027875	CCDC141	0.499169852	0.795116813	0.01547547	0.289914001	-0.126340022	1	0.477545908	0.722500362	0.016495479	0.248023199	-0.374975907	0.805250225	0.154723767	-1.080421263	0.064297506	0.16745426	-0.97992227	0.049679978	0.71783215	1.215556868	0.298150973	0.241141308	-0.393247117	0.884739129	0.035555026	-3.241718139	1.74E-14	0.204561852	-0.616996736	1	0.034422491	-3.219342823	5.24E-07	1.333093524	2.323229799	2.73E-12	0.314281263	0.051612496	1	0.151406264	-0.967336288	1	0.203625108	-0.300327973	0.725032583
ENSBTAG00000001229	SLC25A22	0.092079876	-1.017319708	0.015524606	0.123495834	-0.574075312	0.325823157	0.101489033	-0.872106282	0.022963989	0.105130941	-0.81567033	0.088166694	0.232981734	0.454575588	0.864715237	0.205036324	0.254184542	1	0.443366916	1.363324865	0.253731263	0.12539348	-0.505264375	0.757247998	0.436818888	1.552058832	6.53E-09	0.286768952	0.738280331	0.951640972	0.288766452	0.77378994	0.348867078	0.044396454	-1.997661072	0.004115295	0.344212812	1.013766131	1	0.108147331	-0.58210241	1	0.067875036	-0.46885277	0.835029028
ENSBTAG00000001290	TUBD1	0.039651621	-1.061980565	0.01552547	0.137426767	1.000462235	0.000408175	0.043374981	-0.930092442	0.019041364	0.139030305	0.99449984	0.001126851	0.055557183	-0.522665133	1	0.07754274	-0.010091815	1	0.063338131	-0.168344762	1	0.049982017	-0.658939774	0.583644821	0.082397361	0.087940879	0.966655157	0.053530204	-0.515874139	1	0.0631079	-0.309364246	1	0.038396933	-1.020883633	0.26997961	0.089794647	0.397108246	1	0.108147331	0.588362947	1	0	-0.304198385	1
ENSBTAG00000001241	ISL1	0.004405736	-1.790470614	0.015632165	0.00451814	-1.799367845	0.006730604	0.000842233	-3.779626175	7.72E-07	0.003432847	-2.133470095	0.003495266	0.002986945	-2.200951709	0.033216666	0.002854334	-2.337896476	0.005318952	0.084450841	2.621320926	0.113272575	0.002630632	-2.199005736	0.076031188	0.119645483	4.714731542	5.25E-48	0.022941516	0.719148222	0.980522262	0.004780902	-1.471592653	0.740656674	0.001199904	-2.73244638	0.054882317	0.029931549	1.537979074	1	0	-0.521641132	1	0	2.054924723	1
ENSBTAG00000003457	ATF5	2.653574598	0.771369962	0.015660652	0.831714321	-1.13255498	0.000406147	0.722635606	-1.334300452	2.42E-05	2.268253687	0.49960521	0.294269801	2.699601171	0.765461867	0.105408536	1.052773515	-0.744499995	0.194114566	1.681979255	-0.006931439	0.929792481	4.957865298	1.746287185	4.06E-08	0.7178729	-1.313432158	0.000348153	2.391653057	0.520614225	0.968510822	0.919845452	-0.91098534	0.441709821	0.557955436	-1.636900893	0.011749246	2.289763487	0.4320135	1	1.13554698	-0.573727653	1	1.15387561	-0.559121692	0.724684135
ENSBTAG00000038831	PHYHD1	0.199139253	0.7942539	0.015666928	0.093751411	-0.467893689	0.54160262	0.115806988	-0.121428257	1	0.124440705	-0.003838857	1	0.148152487	0.275290809	1	0.093241577	-0.461799034	1	0.119638692	0.007913201	0.981608554	0.237633798	1.015354823	0.016544191	0.055872183	-1.228424216	0.003670098	0.089854272	-0.460796529	1	0.087012408	-0.534253744	1	0.154787637	0.332839411	0.702133652	0.104760421	-0.085161964	1	0.086517865	-0.379337173	1	0.067875036	0.023054207	0.788354203
ENSBTAG00000021620	PITHD1	0.461280525	-0.918497822	0.015705651	1.120122275	0.530931683	0.180539661	0.533554378	-0.695906429	0.05481946	0.880096162	0.110215442	1	0.759878887	-0.12610789	1	1.104627249	0.486463863	0.640789027	0.745982431	-0.139919156	1	0.408624908	-1.054439673	0.116897268	1.213950164	0.632030732	0.073213993	0.705451621	-0.227598408	1	1.161759069	0.531463764	0.906707877	0.341972686	-1.302371564	0.062707696	0.478904782	-0.760893223	1	1.113917513	0.4370073	1	0.882375467	0.112174155	0.724684135
ENSBTAG00000027513	CXCL2	0	-4.752100532	0.015726999	0.000753023	-3.41277557	0.048557882	0.001263349	-2.804372837	0.091851721	0.001287318	-2.773446698	0.196747312	0.002986945	-1.640993214	1	0.000475722	-3.619789909	0.174832229	0.077413271	3.075376169	0.212787641	0.00350751	-1.314482954	1	0.086912285	5.068073979	4.61E-16	0.007647172	-0.142572403	1	0.010517983	0.133689832	1	0	-3.189161911	0.719989332	0	0.491317635	1	0	0.02660959	1	0	2.603175445	1
ENSBTAG00000016566	ITGA9	0.000440574	-2.973456907	0.015743444	0.001506047	-1.873937119	0.097283314	0.006316745	0.137911665	1	0.000858212	-2.419264404	0.052404892	0.002389556	-1.12429374	1	0.000951445	-2.250960839	0.150861788	0.056300561	3.446743196	0.082232933	0.005261265	-0.016141679	1	0.02878264	2.939848269	1.40E-09	0.009558965	0.920437394	0.976563589	0.00095618	-1.754664812	0.953714849	0.019198467	1.876714068	0.029899801	0.014965774	2.26996126	1	0	0.792869491	1	0	3.369435346	1
ENSBTAG00000017913	BUB3	1.126106039	-0.911786496	0.015844114	3.221434012	0.837553685	0.002572644	1.166071092	-0.861863646	0.010374299	3.21700679	0.813063772	0.008427803	1.538874224	-0.410300637	1	1.973771944	-0.021896515	1	1.829768227	-0.133991372	1	1.104865631	-0.896969363	0.174646749	2.464584085	0.335499625	0.497064336	1.433844758	-0.492587622	1	2.04909439	0.03618287	1	1.018718634	-1.005473754	0.204902996	1.376851247	-0.546193049	1	2.422500223	0.268742934	1	2.172001149	0.068623268	0.724684135
ENSBTAG00000004622	DZANK1	0.054190549	0.910942436	0.016165986	0.025602795	-0.349310836	0.885730104	0.033689306	0.100338461	0.983779487	0.023600823	-0.467725893	0.769282018	0.033453787	0.093104976	1	0.015223115	-1.120964852	0.099157681	0.035187851	0.389173688	0.900381154	0.059627669	0.997294681	0.06666332	0.014673503	-1.151134387	0.033506145	0.034412274	0.181303963	1	0.023904508	-0.388536914	1	0.061195112	1.021197955	0.069091156	0.029931549	0.464977243	1	0	-1.589431222	1	0	0.987134633	1
ENSBTAG00000033486	C17H4orf46	0.045819651	-1.042378992	0.016165986	0.155122816	0.982275172	0.000477103	0.047165028	-1.00338744	0.008974834	0.123582494	0.551643079	0.235995083	0.072881466	-0.308323823	1	0.145571033	0.825612149	0.036643668	0.056300561	-0.510438737	1	0.029813834	-1.602836107	0.013153759	0.076189341	-0.241602986	0.847877641	0.089854272	0.036048797	1	0.088924768	0.006853343	1	0.027597796	-1.68010179	0.024436485	0.089794647	0.20822762	1	0.097332598	0.260648453	1	0.067875036	0.508481034	0.740531051
ENSBTAG00000004896	ABLIM3	0.074897507	-1.027980114	0.016237561	0.088103735	-0.793215618	0.071061113	0.176026622	0.336887945	0.464089579	0.074664423	-1.035639637	0.015722408	0.062725852	-1.264444632	0.026306718	0.082775685	-0.867336072	0.16172352	0.168901682	0.278937468	0.785671904	0.092949013	-0.653389384	0.581511834	0.090298478	-0.721229017	0.155477962	0.168237785	0.242980734	1	0.084143867	-0.796532899	0.874664328	1.169906558	3.588666403	4.82E-35	0.13469197	0.032017836	1	0.162220997	0.248548975	1	0.271500144	1.141241548	0.724684135
ENSBTAG00000013792	UBALD2	0.602704641	-0.914678287	0.016287337	1.903266589	1.020171091	7.01E-05	0.448488881	-1.37253712	1.39E-05	2.283701499	1.336643948	6.81E-08	0.708503427	-0.644759831	0.559963533	0.811582294	-0.445478761	1	0.745982431	-0.524143276	1	0.6971176	-0.653302159	0.523706597	0.855578079	-0.356053703	0.562411888	1.70149578	0.688263952	0.951640972	0.817534159	-0.411646684	1	0.406767511	-1.437120847	0.033415471	1.990447998	0.885336906	1	0.811104985	-0.401650342	1	0.950250503	-0.170439265	0.724684135
ENSBTAG00000001562	NFE2	0.007049177	1.762533564	0.016507521	0.002635582	0.100751793	1	0.002947814	0.286775051	1	0.001287318	-0.802593043	0.876193928	0.001792167	-0.269899062	1	0.001902889	-0.283215038	1	0	1.317082065	1	0.007891897	1.833415741	0.090569925	0.000564365	-1.416637048	0.359640335	0.001911793	0.442390097	1	0.00095618	-0.597123535	1	0	-1.280457745	0.727839563	0	2.400021801	1	0	1.935313756	1	0	4.511879611	1
ENSBTAG00000020980	CAT	9.798356145	0.761219302	0.016706428	8.319778795	0.489575668	0.250744091	8.237456347	0.462520382	0.196630832	5.173729607	-0.309430722	0.867133829	4.710412753	-0.444501461	1	7.090165597	0.203553683	1	4.567382997	-0.465143881	1	4.028375164	-0.668824333	0.41603402	1.299733718	-2.380434719	7.75E-11	6.247739561	-0.004733885	1	3.501532271	-0.875157319	0.491834374	5.896329054	-0.091118396	1	6.959085107	0.135447563	1	4.769297315	-0.405835793	1	6.855378626	0.051126382	0.724684135
ENSBTAG00000044033	EDIL3	0.080184389	0.857192106	0.016775224	0.03576861	-0.492896436	0.584162596	0.039584934	-0.323710958	0.695631645	0.066082306	0.521197796	0.36241379	0.06392063	0.447606218	1	0.033300563	-0.585520007	0.910491261	0.063338131	0.523009563	0.739262821	0.131531623	1.605697659	1.57E-05	0.003950558	-3.563254676	1.07E-10	0.026765102	-0.786329944	0.999563928	0.022948327	-1.07300659	0.550196301	0.021598275	-1.134332512	0.227081084	0.029931549	-0.141963627	1	0	-2.194746784	1	0.067875036	1.383374537	0.724684135
ENSBTAG00000045754	SMIM1	0.023790973	1.103641377	0.016775224	0.006400699	-1.025940212	0.164237538	0.016844653	0.502553095	0.445703931	0.008582118	-0.567319331	0.778398171	0.00657128	-0.899061367	0.855805582	0.00618439	-1.028568418	0.497162713	0	-0.879809984	1	0.01403004	0.231833619	1	0.007336751	-0.754332459	0.38603718	0.021029723	0.869811321	0.954409037	0.004780902	-1.20653908	0.846668323	0.046796262	2.096965463	2.41E-05	0	0.203129752	1	0.032444199	1.756343615	1	0	2.314987562	1
ENSBTAG00000005273	IL1R1	0.067407756	-1.017361489	0.016786889	0.090362805	-0.575887899	0.328991462	0.022319165	-2.664795926	1.08E-12	0.192668541	0.684938447	0.067840595	0.168463715	0.433142911	0.924099109	0.090862965	-0.550129031	0.871082865	0.253352524	1.014260831	0.400348333	0.211327474	0.777342996	0.13182899	0.266944876	1.219804672	2.11E-05	0.200738266	0.672305229	0.951640972	0.184542799	0.559845811	0.829339732	0.015598754	-2.999029853	3.55E-05	0.179589293	0.573943825	1	0.118962065	-0.006831858	1	0.135750072	0.564431048	0.724684135
ENSBTAG00000010976	KANK1	0.18151631	0.813802112	0.016901071	0.0869742	-0.421587102	0.687661583	0.163814249	0.637947966	0.055087906	0.0875376	-0.40332694	0.799526777	0.075271022	-0.618211792	0.872853381	0.113697637	0.01861185	1	0.358916075	1.712019236	0.171580308	0.137669765	0.316147298	0.797135931	0.027653909	-2.107140103	1.33E-06	0.118531167	0.094278071	1	0.086056227	-0.395215256	1	0.143988499	0.381195574	0.651916638	0.164623519	0.652208825	1	0.032444199	-1.40285498	1	0.135750072	0.758000634	0.724684135
ENSBTAG00000026025	ENSBTAG00000026025	0.011454913	1.429958225	0.017150133	0.006400699	0.419199319	0.960364419	0.003368931	-0.543299947	0.740262715	0.004720165	-0.049507784	1	0.004181723	-0.165201684	1	0.004281501	-0.176299834	1	0	0.40114633	1	0.009645652	1.080148335	0.454977038	0.000564365	-2.34555395	0.033934089	0.005735379	0.542916973	1	0.002868541	-0.49659666	1	0.001199904	-1.18189391	0.55014646	0	1.484086066	1	0.021629466	2.633486867	1	0	3.595943876	1
ENSBTAG00000021462	CSF3	0.003084015	2.884524088	0.017174897	0.000753023	0.508836531	1	0	-1.096553588	0.63452523	0	-1.065627449	1	0.001194778	1.25847991	1	0.000475722	0.202211789	1	0	3.138111924	1	0	0.06402867	1	0	-0.623087926	0.93692748	0.003823586	3.027352598	0.951640972	0	0.196425587	1	0	0.540572114	1	0	4.22105166	1	0	3.756343615	1	0	6.33290947	1
ENSBTAG00000013109	STIM1	0.062120873	-1.064418889	0.017397237	0.051582101	-1.368480949	0.000248625	0.048428377	-1.44737595	0.000119565	0.069086047	-0.90435931	0.066979296	0.09558225	-0.381262219	1	0.068028293	-0.917882057	0.148047796	0.633381309	2.420940199	0.038711434	0.102594666	-0.26083074	1	0.56662295	2.879571926	1.44E-32	0.202650059	0.762763285	0.951640972	0.09561803	-0.363885805	1	0.041996646	-1.549403039	0.051538254	0.26938394	1.198450231	1	0.054073666	-0.937298213	1	0.067875036	0.051829474	0.76238766
ENSBTAG00000016177	FGL1	0.173585986	0.792556508	0.017412532	0.102787691	-0.09543729	1	0.152865224	0.574138786	0.088631148	0.083675647	-0.422844294	0.734068327	0.109919587	0.018117973	1	0.102756023	-0.091519414	1	0.084450841	-0.267182301	1	0.103471543	-0.070900911	1	0.04627797	-1.304053904	0.002128471	0.099413237	-0.113668189	1	0.075538244	-0.539818479	1	0.110391183	0.030971614	1	0.089794647	-0.08151111	1	0.097332598	-0.029555624	1	0.135750072	0.805171838	0.724684135
ENSBTAG00000015366	SFRP4	0.181075736	0.822831766	0.017509873	0.109941413	-0.025635161	1	0.152022992	0.520649249	0.166618404	0.057500188	-1.045539874	0.021162196	0.058544128	-0.986080752	0.22301277	0.122260639	0.148888729	1	0.154826542	0.526221096	0.664356801	0.059627669	-0.931084384	0.312923897	0.111744367	0.003801368	1	0.105148616	-0.069405991	1	0.06215172	-0.864914237	0.808811982	0.171586295	0.66028567	0.281622287	0.089794647	-0.117949948	1	0.20547993	0.940768186	1	0.067875036	0.18316235	0.751917123
ENSBTAG00000016677	C1QL3	0.01850409	1.223326002	0.017556847	0.009412792	0.067365624	1	0.017686885	1.149138921	0.013622471	0.0072948	-0.31972873	1	0.00657128	-0.424784664	1	0.007611557	-0.242820451	1	0.02815028	1.923987119	0.366426499	0.002630632	-1.480291847	0.365480034	0.001693096	-2.167408442	0.010453141	0.003823586	-0.731639302	1	0.004780902	-0.746349544	1	0.008399329	0.029610195	1	0	0.652208825	1	0	0.18750078	1	0	2.764066635	1
ENSBTAG00000015307	FBN2	0.047141372	-1.131252303	0.017697583	0.051958613	-1.001579016	0.026158861	0.032425957	-1.69948874	2.22E-05	0.067369623	-0.583726955	0.518886082	0.056751961	-0.821620139	0.556996681	0.050426567	-1.020455772	0.11303932	0.907846543	3.314989686	0.000407932	0.054366404	-0.859155733	0.442510621	0.465601527	2.966773375	5.57E-32	0.183532129	0.963023303	0.951640972	0.033466311	-1.555688644	0.139764218	0.016798658	-2.491136745	0.002163956	0.119726195	0.447680419	1	0.043258933	-0.86814725	1	0	-0.616625463	1
ENSBTAG00000017719	AKAP6	0.011454913	-1.31478472	0.017733135	0.012801397	-1.177140572	0.023010204	0.034952655	0.4245773	0.462046871	0.009869435	-1.536670358	0.003590276	0.014337337	-0.942188615	0.528810159	0.005232946	-2.402650269	5.39E-05	0.077413271	1.63278554	0.284339361	0.014906917	-0.839295311	0.54800944	0.033297564	0.335824882	0.634976506	0.026765102	0.061035724	1	0.021035967	-0.338906146	1	0.227981791	3.649852107	7.37E-28	0.029931549	0.690536943	1	0.054073666	1.234176241	1	0	1.211894069	1
ENSBTAG00000008688	HEYL	0.732233269	0.773524907	0.01779506	0.717254768	0.759718339	0.012480828	0.211400393	-1.241771846	0.000221581	0.639796869	0.53978534	0.229011164	0.421159289	-0.153508803	1	0.5432749	0.256784411	1	0.492629907	0.095401829	0.877362951	0.344612851	-0.45227665	0.80219099	0.103278884	-2.273286376	5.45E-09	0.734128516	0.684761481	0.951640972	0.197929323	-1.272892708	0.149891513	0.116390704	-2.032729859	0.001754947	1.017672661	1.136790157	1	0.313627261	-0.535947338	1	0.475125251	0.130132621	0.724684135
ENSBTAG00000011810	ANGPTL2	0.85206928	-0.90498681	0.01779506	1.072681802	-0.556370156	0.252070398	0.935299348	-0.764090466	0.029451332	1.622878442	0.122198724	1	1.651780756	0.145430552	1	1.085598356	-0.522460198	0.763569698	4.0958658	1.453610084	0.204203384	1.745863072	0.226369076	0.926645042	2.814490688	1.035205509	0.000323986	2.240621409	0.590676688	0.954409037	2.070130357	0.489014191	0.981134252	2.065035063	0.478264236	0.51598944	1.840790254	0.280026147	1	1.038214381	-0.540328232	1	1.357500718	-0.175187116	0.724684135
ENSBTAG00000047591	C23H6orf141	0.028196708	-1.141594973	0.0178781	0.074549314	0.407628814	0.594698213	0.023582514	-1.416117439	0.000593084	0.086679388	0.659541717	0.152451815	0.056154572	-0.063214531	1	0.073261239	0.365338261	1	0.105563552	0.931260354	0.489854846	0.035951977	-0.716248096	0.584976581	0.06885259	0.259090917	0.706356991	0.059265583	0.050072675	1	0.073625883	0.358051265	1	0.073194154	0.34909097	0.74782534	0.029931549	-0.417665807	1	0.032444199	-0.466048806	1	0.135750072	1.694192003	0.724684135
ENSBTAG00000019342	OSBPL3	0.00616803	-1.668016935	0.018032165	0.009036281	-1.149682576	0.114176704	0.003790047	-2.347515162	0.00015487	0.011156753	-0.813240288	0.521285956	0.016726894	-0.168941314	1	0.011417336	-0.764429614	1	0.056300561	1.731111744	0.325571714	0.018414427	-0.000101668	1	0.084654823	2.767319907	7.27E-16	0.021029723	0.256117102	1	0.042071933	1.264252401	0.170414928	0.001199904	-3.064289944	0.0201768	0.029931549	1.205110116	1	0.021629466	0.740402071	1	0.067875036	2.728047412	0.724684135
ENSBTAG00000040058	ORC5	0.059918005	-1.020258845	0.018295984	0.13817979	0.317360498	0.719404088	0.055587354	-1.140005107	0.002048157	0.148470635	0.432997653	0.494595141	0.10812742	-0.089073134	1	0.13891092	0.315580316	1	0.197051963	0.826167918	0.494846328	0.065765811	-0.826230273	0.378426499	0.207122134	0.976849419	0.001687534	0.122354753	0.112629578	1	0.141514685	0.328131266	1	0.034797221	-1.721794222	0.01906375	0.119726195	0.207754837	1	0.129776798	0.276211088	1	0.135750072	0.730684881	0.724684135
ENSBTAG00000038462	TMEM182	0.002643441	-2.056313839	0.018472194	0.00677721	-0.793094655	0.619913321	0.003790047	-1.595655353	0.040608572	0.008153012	-0.495020241	0.998433103	0.007766058	-0.519127669	1	0.004757223	-1.252100859	0.547136612	0.049262991	2.303535533	0.239584	0.005261265	-0.969918662	0.750302017	0.008465482	-0.402697857	0.864712382	0.005735379	-0.625354509	1	0.008605623	-0.302676177	1	0.125989937	4.317402169	4.27E-22	0	0.340039696	1	0	-0.124668349	1	0	2.451897506	1
ENSBTAG00000004240	TMPO	1.019927809	-0.897152716	0.018477242	3.306525654	1.093123197	1.08E-05	1.122696111	-0.751770891	0.031968288	2.612396603	0.636048808	0.085262975	1.182830343	-0.648220203	0.541300807	2.631695926	0.637920936	0.185854944	1.273800189	-0.499855793	1	0.551555938	-1.763381754	0.001060574	1.523222452	-0.259051506	0.737924392	1.328696143	-0.444893825	1	1.886543739	0.075718239	1	0.532757448	-1.796321028	0.004656911	0.987741112	-0.86349498	1	1.113917513	-0.692286305	1	0.882375467	-1.012611944	0.740038176
ENSBTAG00000020736	CD40	0.011895486	-1.330488803	0.018477242	0.020331631	-0.539770374	0.658880126	0.005474512	-2.443004002	1.47E-06	0.038619529	0.513007432	0.536772193	0.036440733	0.403340934	1	0.035203452	0.352689028	1	0.084450841	1.682047157	0.269673403	0.02104506	-0.415891681	0.952849482	0.071110051	1.554810934	4.12E-06	0.026765102	-0.008271312	1	0.041115753	0.585467878	1	0.002399808	-3.057687209	0.00357354	0.029931549	0.622792337	1	0.043258933	0.900353918	1	0	1.144403043	1
ENSBTAG00000048071	EXOSC2	0.076219227	-0.988248074	0.01848025	0.168300725	0.280017841	0.798763461	0.088434427	-0.763184553	0.054473164	0.142892258	0.0027763	1	0.130230816	-0.14127466	1	0.223113772	0.748452059	0.069877812	0.105563552	-0.357476652	1	0.072780831	-1.002538947	0.191854548	0.20260721	0.569251852	0.126986529	0.156767027	0.151547033	1	0.240001256	0.809716811	0.280577531	0.069594441	-1.049272608	0.214481159	0.13469197	0.044197018	1	0.129776798	-0.040403207	1	0.135750072	0.41537163	0.724684135
ENSBTAG00000013436	HAUS5	0.116751995	-0.986118741	0.018550482	0.27410051	0.390937359	0.513790186	0.119597035	-0.953708121	0.009815122	0.269478493	0.353544508	0.662531072	0.183398442	-0.269524288	1	0.291142066	0.478147086	0.682957034	0.71079458	1.731941663	0.146021851	0.140300398	-0.662504725	0.552438727	0.264687414	0.312087916	0.529740944	0.326916605	0.608730561	0.954409037	0.28494173	0.413680429	1	0.111591087	-0.986278088	0.262808275	0.314281263	0.57370226	1	0.162220997	-0.352529277	1	0.203625108	0.219861909	0.724684135
ENSBTAG00000052516	CDA	0.00616803	-1.4517593	0.018558006	0.00677721	-1.351760412	0.015724661	0.007580094	-1.165737154	0.036331892	0.022742612	0.551756529	0.551846189	0.036440733	1.328153438	0.005191102	0.01427167	-0.201143905	1	0.00703757	-0.258778228	1	0.041213242	1.479066169	0.002958415	0.008465482	-0.954602069	0.181444495	0.026765102	0.806546428	0.954409037	0.034422491	1.178343228	0.149891513	0.003599712	-1.847158039	0.100382653	0.044897323	1.833321507	1	0.032444199	1.368613462	1	0	1.931461035	1
ENSBTAG00000001894	NEDD1	0.449385039	-0.901580704	0.018598701	1.127275997	0.608623664	0.080424416	0.456911208	-0.880053334	0.009061135	1.157727667	0.640605713	0.084849805	0.735385935	-0.119352501	1	0.933842933	0.267248698	1	0.66153159	-0.258874341	1	0.43580811	-0.903549853	0.232692761	1.008521127	0.386843866	0.398230075	0.701628035	-0.180861367	1	0.921757812	0.230104789	1	0.323974124	-1.327105555	0.055983341	0.628562526	-0.3245145	1	0.778660786	-0.022786553	1	1.357500718	0.751290412	0.724684135
ENSBTAG00000002362	APOLD1	0.017622943	-1.265718548	0.018722281	0.019578608	-1.131581574	0.023857765	0.013054606	-1.715183802	0.000192808	0.018451553	-1.20114242	0.028796953	0.028077286	-0.534935821	1	0.024737561	-0.746328612	0.691701283	0.197051963	2.371602054	0.080204225	0.020168182	-0.985214849	0.407425784	0.19639919	3.016640379	1.47E-28	0.086030686	1.168539935	0.951640972	0.034422491	-0.20293029	1	0.015598754	-1.305515202	0.226532478	0.089794647	1.36164999	1	0.032444199	0.083918273	1	0	0.654837565	1
ENSBTAG00000009686	FBXO15	0.071813492	-1.002287742	0.018727938	0.172442354	0.409349214	0.479233237	0.059798518	-1.286590042	0.000326866	0.160056494	0.27441544	0.871739116	0.148749876	0.147448598	1	0.239764054	0.96387462	0.00437385	0.260390094	0.975517419	0.414097577	0.059627669	-1.220336681	0.078207243	0.13262589	-0.034452886	1	0.070736341	-0.926655285	0.96258095	0.234264174	0.851073834	0.224715655	0.061195112	-1.161573926	0.156924296	0.119726195	-0.035847169	1	0.151406264	0.239768089	1	0.271500144	1.225779595	0.724684135
ENSBTAG00000017604	RAB13	7.456707633	0.75238486	0.018956488	3.459765911	-0.532011733	0.289804199	3.800995909	-0.374673984	0.455285295	5.768899464	0.310808273	0.771398852	5.55332872	0.236217329	1	3.118835591	-0.679420289	0.301305781	3.4132215	-0.498013384	1	10.46816341	1.241374101	0.000687362	2.968562466	-0.744824955	0.072474717	4.919043418	0.038421467	1	2.755711634	-0.832490216	0.56992246	3.262539418	-0.574970382	0.552176235	5.746857378	0.247221751	1	4.077154394	-0.244069796	1	4.615502441	-0.126126098	0.724684135
ENSBTAG00000003222	ASNS	5.253839794	0.752016491	0.019104004	2.785809988	-0.316462516	0.785090134	3.910907269	0.246156329	0.659068133	3.725068153	0.163913226	1	3.838822112	0.205304707	1	2.811518966	-0.292653002	1	2.385736265	-0.508660652	1	4.429108175	0.421053063	0.635695721	1.325694531	-1.434681384	7.39E-05	2.074295417	-0.718468484	0.964033473	1.579609861	-1.13890406	0.163347082	4.47684243	0.428858493	0.590438448	1.466645893	-1.211187929	1	2.61716542	-0.377196458	1	2.850751508	-0.303681431	0.724684135
ENSBTAG00000021485	C3H1orf54	0.011454913	-1.377396697	0.019269027	0.008283257	-1.880030292	0.000187438	0.009264559	-1.694007033	0.00081328	0.0145896	-1.023807274	0.134612189	0.014337337	-1.004554496	0.540012672	0.00808728	-1.862167439	0.003658076	0.056300561	1.148838331	0.487465938	0.02806008	0.015313384	1	0.182854418	3.846738864	9.45E-44	0.017206137	-0.598637171	1	0.013386524	-1.039641771	0.900498028	0.009599233	-1.448701479	0.219355804	0.029931549	0.630755715	1	0	-1.42422863	1	0.067875036	2.154991678	0.724684135
ENSBTAG00000019014	MAGEF1	1.034466737	0.758174539	0.019487722	0.50603171	-0.441215001	0.498191258	0.96940977	0.648998878	0.033221831	0.432109622	-0.682920956	0.138914066	0.689386977	0.064574286	1	0.680758653	0.045653501	1	0.928959254	0.493879743	0.635053567	0.708517008	0.10490505	1	0.320559597	-1.118980879	0.004727947	0.41294729	-0.69227462	1	0.513468823	-0.384000884	1	0.800336076	0.288014318	0.730833692	0.419041684	-0.632462252	1	0.562366123	-0.224474972	1	0.610875323	-0.058835341	0.724684135
ENSBTAG00000002329	ASAP2	0.045379077	-1.033421696	0.019545772	0.084338618	-0.064736864	1	0.131388292	0.687786007	0.032928721	0.060503929	-0.592072502	0.406771163	0.048388514	-0.906926782	0.29821889	0.095144466	0.134119163	1	0.091488411	0.153652775	0.893465397	0.042090119	-1.082369426	0.174150944	0.067723859	-0.400032958	0.597854167	0.124266546	0.534378962	0.960297367	0.083187686	-0.070247396	1	0.315574795	2.028332456	2.75E-08	0.164623519	1.012465038	1	0.064888399	-0.234179106	1	0	-0.470145315	1
ENSBTAG00000016525	ITGA1	0.040532768	-1.066165061	0.019591416	0.056100242	-0.578365165	0.38516968	0.022319165	-1.963229601	3.55E-07	0.111996635	0.565209794	0.248075362	0.103945697	0.420026776	1	0.056610957	-0.546044966	0.963979062	0.344840935	2.156502784	0.079708444	0.112240318	0.528875887	0.49408549	0.189062438	1.45332519	5.06E-07	0.087942479	0.162143291	1	0.096574211	0.294951324	1	0.013198946	-2.536480944	0.00102759	0.104760421	0.555242029	1	0.032444199	-0.913250136	1	0.067875036	0.661427374	0.725739773
ENSBTAG00000002020	CREBRF	0.051987681	0.997982138	0.019688414	0.02673233	-0.133539212	1	0.026951445	-0.115662411	1	0.023600823	-0.325796521	1	0.026285119	-0.139814325	1	0.016174559	-0.894573274	0.556094137	0.091488411	1.762245022	0.256516141	0.059627669	1.142805783	0.049826875	0.01128731	-1.39534227	0.024481867	0.022941516	-0.249487607	1	0.016255065	-0.8062436	1	0.039596837	0.498751939	0.662878457	0.059863098	1.336128184	1	0.043258933	0.87142014	1	0	1.115678754	1
ENSBTAG00000032774	ADIRF	5.099639046	0.752907073	0.019688414	3.933794128	0.313223345	0.707351788	2.371727117	-0.520272819	0.208631044	3.604918506	0.159755798	1	3.484570398	0.099055336	1	3.681139385	0.191836366	1	1.611603554	-1.031185682	1	2.743749649	-0.269785212	0.947074974	0.951520212	-1.883364104	2.10E-07	3.44122742	0.072717068	1	3.011011775	-0.127711422	1	1.87665011	-0.830902132	0.272336306	5.58223386	0.756509186	1	7.354018535	1.163587312	1	4.344002298	0.336659798	0.724684135
ENSBTAG00000006754	DBP	0.037448753	0.97093884	0.019703657	0.013554421	-0.709264706	0.391757693	0.008843443	-1.330144216	0.008543429	0.025317247	0.29694263	0.973782062	0.026882508	0.389724443	1	0.015698837	-0.4575593	1	0.02111271	0.379666603	1	0.054366404	1.509407336	0.001301979	0.011851675	-0.856678554	0.21597207	0.013382551	-0.508221876	1	0.016255065	-0.34146866	1	0.01439885	-0.485092769	0.875703412	0.029931549	1.044019772	1	0.054073666	1.589985229	1	0	1.563843033	1
ENSBTAG00000000329	MEGF10	0.073575786	0.888824225	0.01973152	0.057229777	0.461741414	0.498918671	0.059798518	0.529339176	0.225300769	0.026604565	-0.77950943	0.246532697	0.023298173	-0.944359714	0.415220882	0.045193621	0.059253835	1	0.182976823	2.136331918	0.107738308	0.027183202	-0.683716763	0.662351054	0.007336751	-2.595342935	1.07E-06	0.040147653	-0.070163908	1	0.011474164	-1.884494408	0.060183705	0.087593004	1.079487248	0.043565431	0.029931549	0.007272369	1	0.010814733	-1.044124921	1	0	0.530716253	1
ENSBTAG00000022989	FAM174B	0.040092195	-1.035893498	0.019806806	0.044051868	-0.90984073	0.031456014	0.030741491	-1.4427119	0.000105334	0.064365882	-0.301875065	0.96046661	0.059738906	-0.402459617	1	0.059941013	-0.409016367	1	0.098525981	0.430292676	0.747763169	0.071027076	-0.125828024	1	0.304757363	2.480644405	3.03E-24	0.130001925	0.783748722	0.951640972	0.073625883	-0.069688212	1	0.037197029	-1.057356278	0.241538891	0.074828872	0.182498419	1	0.108147331	0.59714502	1	0	-0.295475311	1
ENSBTAG00000019707	GATA2	0.020266384	-1.235079328	0.019925997	0.035392099	-0.392670431	0.861653275	0.030320375	-0.627372318	0.298401803	0.028320988	-0.731083577	0.3560273	0.018519061	-1.326482591	0.095270564	0.030921951	-0.586284106	1	0.105563552	1.317082065	0.357636111	0.025429447	-0.826093713	0.534408429	0.194141728	2.694664493	2.31E-22	0.074559927	0.778257383	0.951640972	0.028685409	-0.644660192	1	0.0287977	-0.621208101	0.772011459	0.074828872	0.968070919	1	0.021629466	-0.501672716	1	0	0.486583316	1
ENSBTAG00000046744	PALM3	0.004846309	-1.806637816	0.020200876	0.007906745	-1.145073323	0.180609399	0.00463228	-1.880824897	0.005324516	0.006436588	-1.416124696	0.099825376	0.017324283	0.091023164	1	0.014747392	-0.170342379	1	0.077413271	2.353840615	0.183527292	0.001753755	-2.761530848	0.033741854	0.080139899	2.95985823	3.61E-16	0.022941516	0.571806506	0.994129097	0.027729229	0.820382219	0.907869063	0.001199904	-2.874465385	0.052489879	0.029931549	1.395492142	1	0.021629466	0.930784098	1	0.067875036	2.917871971	0.724684135
ENSBTAG00000013380	CEP192	0.065204888	-1.017840909	0.020200876	0.196915613	0.802089584	0.010695216	0.059377401	-1.165974989	0.00170919	0.198676023	0.797622983	0.020468326	0.109919587	-0.192693495	1	0.129396474	0.063404862	1	0.408179066	1.748980718	0.155003025	0.073657709	-0.782081127	0.438653543	0.129804062	0.068117351	0.985067664	0.124266546	0.01292239	1	0.134821423	0.127004186	1	0.056395496	-1.153069714	0.181675571	0.13469197	0.24102636	1	0.108147331	-0.085568529	1	0	-0.974519055	1
ENSBTAG00000038233	ENSBTAG00000038233	0.007930324	-1.359401495	0.020201987	0.010918839	-0.915878882	0.141622688	0.010106792	-1.013412353	0.058244144	0.013302282	-0.597528706	0.628667323	0.010753003	-0.869968455	0.686693921	0.00808728	-1.316363315	0.069352204	0.02815028	0.820036155	0.70336059	0.01753755	-0.120579089	1	0.093684671	2.939586508	3.50E-25	0.015294344	-0.218626643	1	0.021992147	0.216603469	1	0.021598275	0.203537127	1	0.014965774	0.569521542	1	0	-0.899008213	1	0	1.677557641	1
ENSBTAG00000009341	CCDC146	0.007930324	1.774899597	0.020201987	0.003012094	0.121813408	1	0	-3.072306042	0.024637584	0.001716424	-0.618168472	1	0.002986945	0.204032126	1	0.001902889	-0.449864908	1	0.01407514	2.797075006	0.380099622	0.00701502	1.468418925	0.316218117	0.002257462	-0.175628949	1	0.005735379	1.335474894	0.970881815	0	-1.779326867	0.986264949	0	-1.435180339	0.643758987	0	2.245299206	1	0.021629466	3.415306697	1	0	4.357157016	1
ENSBTAG00000001328	SLBP	0.494764116	-0.893003267	0.020201987	0.703700347	-0.347248247	0.716514626	0.403850551	-1.2099948	0.000152513	0.912708209	0.081762867	1	1.178648619	0.490744377	0.758870859	1.530398734	0.96020886	0.002811067	0.872658693	0.008235463	0.926002441	0.562078468	-0.659027405	0.516846605	1.153563057	0.45861916	0.272706074	0.737952102	-0.240316301	1	1.587259304	0.94035653	0.106498043	0.346772303	-1.360602724	0.047845645	0.718357172	-0.266564187	1	0.713772387	-0.278317126	1	0.678750359	-0.313305564	0.724684135
ENSBTAG00000008841	DCAF15	0.16301222	-0.957682224	0.020201987	0.377641224	0.401100448	0.513790186	0.144442898	-1.148181988	0.000954803	0.390486352	0.4494737	0.452348769	0.290331084	-0.043947359	1	0.352510246	0.271629278	1	0.577080748	0.966514083	0.398404508	0.203435576	-0.579315572	0.649390113	0.428353405	0.585701194	0.103858636	0.353681707	0.255199732	1	0.395858646	0.434781441	1	0.130789554	-1.217743986	0.11098828	0.404075909	0.467691627	1	0.270368328	-0.104440957	1	0.271500144	0.088276071	0.724684135
ENSBTAG00000012178	NR1D1	0.122920025	0.81413476	0.020201987	0.062877452	-0.314285707	0.885547364	0.10191015	0.490785676	0.21225836	0.048488965	-0.716015796	0.226190318	0.064518019	-0.253392683	1	0.057562402	-0.441238903	1	0.112601122	0.641614484	0.619121454	0.092949013	0.314711619	0.811821834	0.042327412	-0.898722368	0.070905875	0.084118892	0.172180639	1	0.041115753	-0.900776572	0.753228884	0.142788595	0.970649013	0.053510735	0.104760421	0.628096368	1	0.140591531	0.976733684	1	0.067875036	0.733988512	0.725203879
ENSBTAG00000000993	N4BP2L1	0.150235587	0.802530716	0.020418309	0.054594195	-0.868856276	0.047325697	0.042953865	-1.223406724	0.00129875	0.117145906	0.373241191	0.662531072	0.132620372	0.561067563	0.601996537	0.057562402	-0.763599525	0.369648187	0.190014393	1.069359233	0.386857167	0.266570755	1.687337482	1.52E-06	0.038376853	-1.356704255	0.002168036	0.151031648	0.724977301	0.951640972	0.053546097	-0.822849742	0.872125784	0.046796262	-1.003748402	0.290389087	0.074828872	-0.087995144	1	0.054073666	-0.552703188	1	0.067875036	0.435669044	0.739108338
ENSBTAG00000050495	GREM1	0.001321721	-2.464204066	0.020424372	0.001882558	-2.121640629	0.026821573	0.002526698	-1.704236166	0.067853595	0.008153012	-0.036481104	1	0.010753003	0.412431275	1	0.002378612	-1.736387667	0.311460462	0.02111271	1.696274365	0.516738631	0.018414427	1.250441794	0.2500332	0.028218274	2.098247017	3.33E-05	0.015294344	1.008974069	0.968452876	0.022948327	1.597425253	0.156456263	0.002399808	-1.325126794	0.678386398	0.014965774	1.761620041	1	0	0.28819478	1	0	2.864760634	1
ENSBTAG00000004490	TRIM31	0.017622943	1.175986902	0.021027863	0.013554421	0.725242658	0.357345292	0.008422326	-0.064132111	1	0.009011224	0.043306922	1	0.004181723	-1.009747165	0.846834004	0.010941614	0.356124472	1	0.00703757	0.610374292	1	0.009645652	0.207153612	1	0.001693096	-2.134049845	0.009851941	0.005735379	-0.275022699	1	0.001912361	-1.737986071	0.507860836	0.007199425	-0.137499791	1	0	0.68499876	1	0	0.220290715	1	0	2.79685657	1
[truncated: 16,037 more rows]
